# Supplementary material for: Hypervalent iodine compounds for anti-Markovnikov-type iodo-oxyimidation of vinylarenes
Source: publisher site journal article supplement (doi:10.3762/bjoc.14.188), 2018-08-16
Supplement: Additional file 1 [file 1860-5397-14-188-S1.pdf]

**Supporting Information**  
**for**  
**Hypervalent iodine compounds for anti-Markovnikov-**  
**type iodo-oxyimination of vinylarenes**

Igor B. Krylov<sup>1,2</sup>, Stanislav A. Paveliev<sup>1</sup>, Mikhail A. Syroeshkin<sup>1</sup>, Alexander A. Korlyukov<sup>3,4</sup>, Pavel V. Dorovatskii<sup>5</sup>, Yan V. Zubavichus<sup>5</sup>, Gennady I. Nikishin<sup>1</sup> and Alexander O. Terent'ev<sup>1,2\*</sup>

Address: <sup>1</sup>N. D. Zelinsky Institute of Organic Chemistry of the Russian Academy of Sciences, 47 Leninsky prosp., 119991 Moscow, Russian Federation, <sup>2</sup>All-Russian Research Institute for Phytopathology, 143050 B. Vyazyomy, Moscow Region, Russian Federation, <sup>3</sup>Nesmeyanov Institute of Organoelement Compounds, Russian Academy of Sciences, Vavilov str., 28, 119991 Moscow, Russian Federation, <sup>4</sup>Pirogov Russian National Research Medical University, Ostrovitianov str., 1, 117997 Moscow, Russian Federation and <sup>5</sup> National Research Center "Kurchatov Institute", Akademika Kurchatova pl., 1, 123182 Moscow, Russian Federation

Email: Alexander Olegovich Terent'ev\* - terentev@ioc.ac.ru

\*Corresponding author

**Experimental procedures, characterization data, copies of spectra and  
the ORTEP diagram and X-ray data for compound 3ca**

## Table of contents

|                                                  |       |     |
|--------------------------------------------------|-------|-----|
| Experimental details                             | ..... | S3  |
| NMR spectra of compounds                         |       |     |
| <b>3aa-ka, 3ab-db, 3fb, 3hb, 3kb, 4a-c</b>       | ..... | S13 |
| HRMS spectra of compounds                        |       |     |
| <b>3ga, 3ia, 3cb, 4a-c</b>                       | ..... | S65 |
| FT-IR spectra for compound                       |       |     |
| <b>3aa-ka, 3ab-db, 3fb, 3hb, 3kb, 4a-c</b>       | ..... | S71 |
| Structure Determination by X-ray crystallography | ..... | S92 |

## General methods

$^1\text{H}$ ,  $^{13}\text{C}$  and  $^{19}\text{F}$  NMR spectra were recorded on a Bruker AVANCE II 300 spectrometer (300.13 MHz, 75.47 MHz and 282.40 MHz, respectively) in  $\text{CDCl}_3$  and  $\text{DMSO}-d_6$ .  $^1\text{H}$ - $^{15}\text{N}$  HMBC NMR spectra were recorded on a Bruker AVANCE III 400 spectrometer (400.13 MHz and 40.56 Hz, respectively). Chemical shifts were reported in parts per million (ppm), and the residual solvent peak was used as an internal reference:  $^1\text{H}$  ( $\text{CDCl}_3$   $\delta$  = 7.26 ppm,  $\text{DMSO}-d_6$   $\delta$  = 2.50 ppm),  $^{13}\text{C}$  ( $\text{CDCl}_3$   $\delta$  = 77.16 ppm,  $\text{DMSO}-d_6$   $\delta$  = 39.52 ppm). Multiplicity was indicated as follows: s (singlet), d (doublet), t (triplet), q (quartet), dd (doublet of doublets), dt (doublet of triplets), td (triplet of doublets), m (multiplet).

High resolution mass spectra (HR-MS) were measured on a Bruker maXis instrument using electrospray ionization (ESI). The measurements were performed in the positive ion mode (interface capillary voltage – 4500 V) at a mass range from  $m/z$  50 to  $m/z$  3000 Da and external calibration with Electrospray Calibrant Solution (Fluka). A syringe injection was used for all acetonitrile solutions (flow rate 3  $\mu\text{L}/\text{min}$ ). Nitrogen was applied as a drying gas and the interface temperature was set at 180  $^\circ\text{C}$ . FT-IR spectra were recorded on a Bruker ALPHA FT-IR spectrometer.

## Materials

Column chromatography was performed using silica gel (0.060–0.200 mm, 60  $\text{\AA}$ , Acros). Dichloromethane (DCM) and hexane were distilled over  $\text{K}_2\text{CO}_3$ . Acetonitrile (MeCN) and ethyl acetate (EtOAc) were distilled over  $\text{P}_2\text{O}_5$ . Toluene (PhMe) was distilled over sodium metal. Methanol (MeOH) was distilled over magnesium turnings. Glacial acetic acid (AcOH) and *N,N*-dimethylformamide (DMF) were used as received from commercial sources.

Vinylarenes **1a–k**, *N*-hydroxyphthalimide (**2a**, NHPI), *N*-hydroxysuccinimide (**2b**, NHSI), (diacetoxyiodo)benzene ( $\text{PhI}(\text{OAc})_2$ ), 2-iodobenzoic acid, Oxone, *tert*-butylhydroperoxide (70% aqueous solution) (TBHP), sodium iodide dihydrate ( $\text{NaI}\cdot 2\text{H}_2\text{O}$ ), tetrabutylammonium iodide (TBAI), ammonium peroxydisulfate ( $(\text{NH}_4)_2\text{S}_2\text{O}_8$ ), 2,3-dichloro-5,6-dicyano-1,4-benzoquinone (DDQ), *m*-chloroperoxybenzoic acid (70–75%, balance 3-chlorobenzoic acid and water) (*m*-CPBA), sodium benzenesulfinate ( $\text{PhSO}_2\text{Na}$ ) and sodium azide ( $\text{NaN}_3$ ) were commercial reagents (Acros, Sigma, Alfa Aesar). [Bis(trifluoroacetoxy)iodo]benzene ( $\text{PhI}(\text{OCOCF}_3)_2$ ), 2-iodoxybenzoic acid (IBX) and Dess–Martin periodinane (DMP) were synthesized according to the literature [1-3].

## Experimental for Table 1

Iodine (127 mg, 0.5 mmol) was added to a stirred mixture of styrene **1a** (104 mg, 1 mmol) and *N*-hydroxyphthalimide **2a** (163 mg, 1 mmol) in solvent (6 mL) at 20–25 °C. Then, oxidant (PhI(OAc)<sub>2</sub>, PhI(OCOCF<sub>3</sub>)<sub>2</sub>, IBX, DMP, Oxone, TBHP, (NH<sub>4</sub>)<sub>2</sub>S<sub>2</sub>O<sub>8</sub> or DDQ, 84-948 mg, 0.6-3 mmol) was added. At entry 8, NaI·2H<sub>2</sub>O (186 mg, 1 mmol) was employed instead of I<sub>2</sub>. In entry 9, TBAI (369 mg, 1 mmol) was employed instead of I<sub>2</sub>. In entry 16 in addition to Oxone 2-iodobenzoic acid (12 mg, 0.05 mmol) was added. In entry 20 in addition to TBHP TBAI (16 mg, 0.05 mmol) was added. After stirring the reaction mixture under air atmosphere at 20–25 °C for 5 min – 24 h, DCM (30 mL) was added. The mixture was washed with aqueous solution of Na<sub>2</sub>S<sub>2</sub>O<sub>3</sub>·5H<sub>2</sub>O (200 mg in 20 mL of water), saturated aqueous NaHCO<sub>3</sub> solution (20 mL), then with water (20 mL), dried over anhydrous MgSO<sub>4</sub> and filtered. DCM was rotary evaporated at 20–25 °C under water-jet vacuum (20–30 mmHg). Product **3aa** was isolated by column chromatography on silica gel using EtOAc – DCM eluent (2.5% volume part of EtOAc).

**2-(2-Iodo-2-phenylethoxy)isoindoline-1,3-dione (3aa).** White solid: 90% yield (176 mg); mp = 135-136 °C. <sup>1</sup>H NMR (300.13 MHz, CDCl<sub>3</sub>): δ = 7.85-7.68 (m, 4H), 7.54 (d, *J* = 7.4 Hz, 2H), 7.36-7.17 (m, 3H), 5.53 (dd, *J*<sub>1</sub> = 9.8 Hz, *J*<sub>2</sub> = 5.7 Hz, 1H), 5.00-4.88 (m, 1H), 4.71 (dd, *J*<sub>1</sub> = 10.7 Hz, *J*<sub>2</sub> = 5.7 Hz, 1H). <sup>13</sup>C NMR (75.47 MHz, CDCl<sub>3</sub>): δ = 163.3, 139.8, 134.7, 128.9, 128.7, 128.6, 127.9, 123.7, 81.4, 25.2. <sup>15</sup>N NMR (40.56 MHz, CDCl<sub>3</sub>): δ = -163.0. IR (KBr) ν(cm<sup>-1</sup>): = 1731, 1720, 1465, 1192, 1138, 1127, 1114, 1081, 1020, 988, 875, 716, 696, 519. Anal. Calcd for C<sub>16</sub>H<sub>12</sub>INO<sub>3</sub>: C, 48.88; H, 3.08; N, 3.56. Found: C, 48.73; H, 2.95; N, 3.56.

## General procedure for synthesis of compounds **3aa–ka**, **3ab–db**, **3fb**, **3hb** and **3kb** (experimental for Figure 1)

Iodine (64 mg, 0.25 mmol) was added to a stirred mixture of vinylarene **1a–k** (52-97 mg, 0.50 mmol) and *N*-hydroxyimide **2a,b** (58-82 mg, 0.50 mmol) in DCM (3 mL) at 20–25 °C. Then, PhI(OAc)<sub>2</sub> (97 mg, 0.30 mmol) was added. In the additional experiments compounds **3ca** and **3ga** were prepared using IBX (140 mg, 0.50 mmol) or DMP (64 mg, 0.15 mmol) instead of PhI(OAc)<sub>2</sub>. After stirring for 10 min under air atmosphere at 20-25 °C DCM (30 mL) was added and the mixture was washed with aqueous solution of Na<sub>2</sub>S<sub>2</sub>O<sub>3</sub>·5H<sub>2</sub>O (200 mg in 20 mL of water), saturated aqueous NaHCO<sub>3</sub> solution (20 mL), then with water (20 mL), dried over anhydrous MgSO<sub>4</sub> and filtered. DCM was rotary evaporated at 20–25 °C under water-jet vacuum (20–30 mmHg). Products **3aa–ka**,



**3ab–db, 3fb, 3hb** and **3kb** were isolated by column chromatography on silica gel using with EtOAc – DCM eluent (with the volume part of EtOAc gradually increased from 0% to 2.5%).

Iodo-oxyimides **3aa–ka, 3ab–db, 3fb, 3hb** and **3kb** were stored in the freezer and handled with minimal heat due to their potential instability at elevated temperature, which was indicated by the darkening both pure powders and solutions when standing at room temperature for even a few hours.

***2-(2-Iodo-2-(p-tolyl)ethoxy)isoindoline-1,3-dione (mixture of regioisomers 4:1) (3ba).***

White solid: 81% yield (176 mg); mp = 135-136 °C. <sup>1</sup>H NMR (300.13 MHz, CDCl<sub>3</sub>): δ = 7.84-7.66 (m, 4H), 7.47-7.35 (m, 2H), 7.17 (d, *J* = 7.8 Hz, 0.4H), 7.09 (d, *J* = 7.9 Hz, 1.6H), 5.56-5.45 (m, 1H), 4.97-4.87 (m, 0.8H), 4.67 (dd, *J*<sub>1</sub> = 10.7 Hz, *J*<sub>2</sub> = 5.6 Hz, 0.8H), 3.73 (dd, *J*<sub>1</sub> = 10.4 Hz, *J*<sub>2</sub> = 6.2 Hz, 0.2H), 3.57 (dd, *J*<sub>1</sub> = 10.4 Hz, *J*<sub>2</sub> = 8.0 Hz, 0.2H), 2.33 (s, 0.6H), 2.25 (s, 2.4H). <sup>13</sup>C NMR (75.47 MHz, CDCl<sub>3</sub>): δ = 163.3, 138.7, 136.8, 134.7, 129.7, 128.7, 127.6, 123.7, 81.3, 25.6, 21.3. <sup>15</sup>N NMR (40.56 MHz, CDCl<sub>3</sub>): δ = -163.1. IR (KBr) ν(cm<sup>-1</sup>): 1786, 1726, 1375, 1359, 1187, 1129, 1113, 1081, 978, 877, 699. Anal. Calcd for C<sub>17</sub>H<sub>14</sub>INO<sub>3</sub>: C, 50.14; H, 3.47; N, 3.44. Found: C, 50.15; H, 3.48; N, 3.43.

***2-(2-(4-Chlorophenyl)-2-iodoethoxy)isoindoline-1,3-dione (3ca).***

White solid: 91% yield (194 mg); mp = 137-138 °C. <sup>1</sup>H NMR (300.13 MHz, CDCl<sub>3</sub>): δ = 7.87-7.70 (m, 4H), 7.50 (d, *J* = 8.5 Hz, 2H), 7.30 (d, *J* = 8.4 Hz, 2H), 5.50 (dd, *J*<sub>1</sub> = 10.2 Hz, *J*<sub>2</sub> = 5.3 Hz, 1H), 4.97-4.86 (m, 1H), 4.67 (dd, *J*<sub>1</sub> = 10.7 Hz, *J*<sub>2</sub> = 5.3 Hz, 1H). <sup>13</sup>C NMR (75.47 MHz, CDCl<sub>3</sub>): δ = 163.3, 138.5, 134.8, 134.4, 129.3, 129.2, 128.8, 123.7, 81.2, 23.7. <sup>15</sup>N NMR (40.56 MHz, CDCl<sub>3</sub>): δ = -163.7. IR (KBr) ν(cm<sup>-1</sup>): 1787, 1727, 1492, 1469, 1392, 1374, 1360, 1188, 1133, 1081, 1014, 977, 933, 877, 836, 787, 726, 698. Anal. Calcd for C<sub>16</sub>H<sub>11</sub>ClINO<sub>3</sub>: C, 44.94; H, 2.59; N, 3.28. Found: C, 44.91; H, 2.55; N, 3.22.

***2-(2-(4-Fluorophenyl)-2-iodoethoxy)isoindoline-1,3-dione (3da).***

White solid: 77% yield (158 mg); mp = 153-154 °C. <sup>1</sup>H NMR (300.13 MHz, CDCl<sub>3</sub>): δ = 7.87-7.68 (m, 4H), 7.53 (dd, *J*<sub>1</sub> = 8.6 Hz, *J*<sub>2</sub> = 5.3 Hz, 2H), 7.00 (t, *J* = 8.6 Hz, 2H), 5.50 (dd, *J*<sub>1</sub> = 10.1 Hz, *J*<sub>2</sub> = 5.4 Hz, 1H), 4.88 (m, 1H), 4.66 (dd, *J*<sub>1</sub> = 10.7 Hz, *J*<sub>2</sub> = 5.4 Hz, 1H). <sup>13</sup>C NMR (75.47 MHz, CDCl<sub>3</sub>): δ = 163.3, 162.5 (d, *J* = 248.6 Hz), 135.8 (d, *J* = 3.4 Hz), 134.8, 129.8 (d, *J* = 8.4 Hz), 128.8, 123.7, 115.9 (d, *J* = 21.8 Hz), 81.5, 24.1. <sup>19</sup>F NMR (282.40 MHz, CDCl<sub>3</sub>): δ = -112.5 (1F). IR (KBr) ν(cm<sup>-1</sup>): 1732, 1720, 1509, 1464, 1236, 1138,

1125, 986, 875, 837, 696. Anal. Calcd for C<sub>16</sub>H<sub>11</sub>FINO<sub>3</sub>: C, 46.74; H, 2.70; N, 3.41. Found: C, 46.51; H, 2.71; N, 3.29.

**2-(2-Iodo-2-(*m*-tolyl)ethoxy)isoindoline-1,3-dione (3ea).** White solid: 85% yield (173 mg); mp = 123-124 °C. <sup>1</sup>H NMR (300.13 MHz, CDCl<sub>3</sub>): δ = 7.82-7.67 (m, 4H), 7.34-7.27 (m, 2H), 7.20-7.13 (m, 1H), 6.98 (d, *J* = 7.4 Hz, 1H), 5.48 (dd, *J*<sub>1</sub> = 9.7 Hz, *J*<sub>2</sub> = 5.7 Hz, 1H), 4.97-4.88 (m, 1H), 4.67 (dd, *J*<sub>1</sub> = 10.7 Hz, *J*<sub>2</sub> = 5.7 Hz, 1H), 2.30 (s, 3H). <sup>13</sup>C NMR (75.47 MHz, CDCl<sub>3</sub>): δ = 163.2, 139.7, 138.6, 134.7, 129.5, 128.9, 128.8, 128.4, 125.0, 123.6, 81.3, 25.5, 21.45. IR (KBr) ν(cm<sup>-1</sup>): 1722, 1467, 1361, 1188, 1124, 983, 874, 789, 719, 699, 518. Anal. Calcd for C<sub>17</sub>H<sub>14</sub>INO<sub>3</sub>: C, 50.14; H, 3.47; N, 3.44. Found: C, 50.21; H, 3.31; N 3.31.

**2-(2-(3-Bromophenyl)-2-iodoethoxy)isoindoline-1,3-dione (3fa).** White solid: 79% yield (186 mg); mp = 134-135 °C. <sup>1</sup>H NMR (300.13 MHz, CDCl<sub>3</sub>): δ = 7.84-7.70 (m, 4H), 7.69-7.64 (m, 1H), 7.50-7.44 (m, 1H), 7.36-7.29 (m, 1H), 7.22-7.14 (m, 1H), 5.42 (dd, *J*<sub>1</sub> = 5.4 Hz, *J*<sub>2</sub> = 10.1 Hz, 1H), 4.93-4.84 (m, 1H), 4.65 (dd, *J*<sub>1</sub> = 10.8 Hz, *J*<sub>2</sub> = 5.4 Hz, 1H). <sup>13</sup>C NMR (75.47 MHz, CDCl<sub>3</sub>): δ = 163.2, 142.1, 134.8, 131.7, 131.0, 130.5, 128.7, 126.7, 123.8, 122.7, 81.2, 23.2. IR (KBr) ν(cm<sup>-1</sup>): 1720, 1464, 1369, 1189, 1134, 1123, 1080, 1069, 873, 787, 697, 519. Anal. Calcd for C<sub>16</sub>H<sub>11</sub>BrINO<sub>3</sub>: C, 40.71; H, 2.35; N, 2.97. Found: C, 40.92; H, 2.32; N 2.95.

**2-(2-Iodo-2-(*o*-tolyl)ethoxy)isoindoline-1,3-dione (3ga).** White solid: 87% yield (177 mg); mp = 112-113 °C. <sup>1</sup>H NMR (300.13 MHz, CDCl<sub>3</sub>): δ = 7.82-7.69 (m, 4H), 7.59 (d, *J* = 7.5 Hz, 1H), 7.21-7.09 (m, 3H), 5.69 (dd, *J*<sub>1</sub> = 9.7 Hz, *J*<sub>2</sub> = 5.9 Hz, 1H), 5.11-5.02 (m, 1H), 4.75 (dd, *J*<sub>1</sub> = 10.6 Hz, *J*<sub>2</sub> = 5.9 Hz, 1H), 2.40 (s, 3H). <sup>13</sup>C NMR (75.47 MHz, CDCl<sub>3</sub>): δ = 163.2, 137.5, 136.3, 134.7, 131.3, 128.8, 128.6, 126.8, 126.1, 123.7, 80.4, 22.4, 19.3. IR (KBr) ν(cm<sup>-1</sup>): 1791, 1720, 1542, 1465, 1190, 1128, 1019, 984, 875, 722, 697, 518. HRMS (ESI) Calcd for C<sub>17</sub>H<sub>14</sub>INO<sub>3</sub> [M + NH<sub>4</sub>]<sup>+</sup> = 425.0357, Found 425.0352.

**2-(2-Iodo-2-(perfluorophenyl)ethoxy)isoindoline-1,3-dione (3ha).** White solid: 63% yield (152 mg); mp = 140-141 °C. <sup>1</sup>H NMR (300.13 MHz, CDCl<sub>3</sub>): δ = 7.89-7.71 (m, 4H), 5.65 (dd, *J*<sub>1</sub> = 11.0 Hz, *J*<sub>2</sub> = 5.8 Hz, 2H), 5.02-4.90 (t, *J* = 11.0 Hz, 1H), 4.70 (dd, *J*<sub>1</sub> = 11.0 Hz, *J*<sub>2</sub> = 5.8 Hz, 1H). <sup>13</sup>C NMR (75.47 MHz, CDCl<sub>3</sub>): δ = 163.3, 135.0, 128.8, 123.9, 114.1 (td, *J*<sub>1</sub> = 14.8 Hz, *J*<sub>2</sub> = 4.6 Hz), 79.8 (t, *J* = 3.9 Hz), 6.4. <sup>19</sup>F NMR (282.40 MHz, CDCl<sub>3</sub>): δ = -140.1 (bs, 2F), -153.1 (t, *J* = 20.9 Hz, 1F) -161.2 (td, *J*<sub>1</sub> = 21.4 Hz, *J*<sub>2</sub>

= 6.9 Hz, 2F). IR (KBr)  $\nu(\text{cm}^{-1})$ : 1735, 1723, 1525, 1505, 1468, 1192, 1145, 1126, 1040, 1019, 994, 970, 909, 877, 697. Anal. Calcd for  $\text{C}_{16}\text{H}_7\text{F}_5\text{INO}_3$ : C, 39.78; H, 1.46; N, 2.90. Found: C, 39.64; H, 1.32; N, 2.83.

**2-((1-Iodo-1-phenylpropan-2-yl)oxy)isoindoline-1,3-dione (mixture of diastereomers 1:1) (3ia).** White solid: 51% yield (103 mg); mp = 118-119 °C.  $^1\text{H}$  NMR (300.13 MHz,  $\text{CDCl}_3$ ):  $\delta$  = 7.92-7.66 (m, 4H), 7.60-7.48 (m, 2H), 7.37-7.11 (m, 3H), 5.42 (d,  $J$  = 7.5 Hz, 0.5H), 5.32 (d,  $J$  = 6.8 Hz, 0.5H), 4.84-4.68 (m, 1H), 1.69 (d,  $J$  = 6.1 Hz, 1.5H), 1.32 (d,  $J$  = 6.3 Hz, 1.5H).  $^{13}\text{C}$  NMR (75.47 MHz,  $\text{CDCl}_3$ ):  $\delta$  = 164.1, 163.8, 140.3, 139.9, 134.8, 134.6, 129.13, 129.07, 128.9, 128.74, 128.67, 128.6, 128.50, 128.3, 123.8, 123.6, 87.4, 85.5, 34.3, 32.2, 19.4, 16.8. IR (KBr)  $\nu(\text{cm}^{-1})$ : 1721, 1376, 1189, 1125, 974, 875, 698. HRMS (ESI) Calcd for  $\text{C}_{17}\text{H}_{14}\text{INO}_3$   $[\text{M} + \text{NH}_4]^+$  = 425.0357, Found 425.0348.

**2-(2-Iodo-1,2-diphenylethoxy)isoindoline-1,3-dione (mixture of diastereomers 1.8:1) (3ja).** White solid: 83% yield (195 mg); mp = 164-165 °C.  $^1\text{H}$  NMR (300.13 MHz,  $\text{CDCl}_3$ ):  $\delta$  = 7.75-7.53 (m, 6H), 7.41-7.22 (m, 6H), 7.20-7.07 (m, 2H), 6.23 (d,  $J$  = 10.2 Hz, 0.65H), 5.89 (d,  $J$  = 9.5 Hz, 0.35 H), 5.64 (d,  $J$  = 10.2 Hz, 0.65H), 5.49 (d,  $J$  = 9.5 Hz, 0.35H).  $^{13}\text{C}$  NMR (75.47 MHz,  $\text{CDCl}_3$ ):  $\delta$  = 163.4, 163.1, 140.2, 139.9, 136.05, 134.5, 134.35, 134.0, 130.0, 129.4, 129.1, 128.8, 128.71, 128.66, 128.60, 128.55, 128.5, 128.33, 128.29, 128.2, 128.18, 123.5, 123.3, 91.1, 89.8, 31.8, 30.75. IR (KBr)  $\nu(\text{cm}^{-1})$ : 2361, 2343, 1731, 1372, 1188, 1132, 973, 875, 696. Anal. Calcd for  $\text{C}_{22}\text{H}_{16}\text{INO}_3$ : C, 56.31; H, 3.44; N, 2.98. Found: C, 55.97; H, 3.40; N, 2.95.

**2-((1-Iodo-2,3-dihydro-1H-inden-2-yl)oxy)isoindoline-1,3-dione (3ka).** White solid: 79% yield (160 mg); mp = 119-120 °C (dec).  $^1\text{H}$  NMR (300.13 MHz,  $\text{CDCl}_3$ ):  $\delta$  = 7.91-7.76 (m, 4H), 7.52-7.45 (m, 1H), 7.31-7.25 (m, 3H), 5.95 (m, 1H), 5.36 (dt,  $J_1$  = 5.6 Hz,  $J_2$  = 1.4 Hz, 1H), 3.55 (dd,  $J_1$  = 17.6 Hz,  $J_2$  = 5.6 Hz, 1H), 3.33 (d,  $J$  = 17.6 Hz, 1H).  $^{13}\text{C}$  NMR (75.47 MHz,  $\text{CDCl}_3$ ):  $\delta$  = 164.1, 143.0, 139.6, 134.9, 129.2, 128.9, 128.1, 125.9, 125.2, 123.9, 96.2, 36.0, 29.5.  $^{15}\text{N}$  NMR (40.56 MHz,  $\text{CDCl}_3$ ):  $\delta$  = -163.9. IR (KBr)  $\nu(\text{cm}^{-1})$ : 1791, 1736, 1463, 1369, 1357, 1186, 1122, 1003, 979, 878, 705. Anal. Calcd for  $\text{C}_{17}\text{H}_{12}\text{INO}_3$ : C, 50.39; H, 2.99; N, 3.46. Found: C, 50.40; H, 2.97; N, 3.43.

**1-(2-Iodo-2-phenylethoxy)pyrrolidine-2,5-dione (3ab).** White solid: 67% yield (116 mg); mp = 118-119 °C.  $^1\text{H}$  NMR (300.13 MHz,  $\text{CDCl}_3$ ):  $\delta$  = 7.50-7.44 (m, 2H), 7.36-7.22 (m, 3H), 5.43 (dd,  $J_1$  = 10.3 Hz,  $J_2$  = 5.2 Hz, 1H), 4.91 (dd,  $J_1$  = 10.6 Hz,  $J_2$  = 10.3 Hz, 1H),

4.56 (dd,  $J_1 = 10.6$  Hz,  $J_2 = 5.2$  Hz, 1H), 2.53-2.34 (m, 4H).  $^{13}\text{C}$  NMR (75.47 MHz,  $\text{CDCl}_3$ ):  $\delta = 170.8, 140.0, 129.0, 128.7, 127.7, 79.5, 25.4, 25.0$ . IR (KBr)  $\nu(\text{cm}^{-1})$ : 1722, 1707, 1212, 1077, 943, 811, 698, 651. Anal. Calcd for  $\text{C}_{12}\text{H}_{12}\text{INO}_3$ : C, 41.76; H, 3.50; N, 4.06. Found: C, 41.73; H, 3.48; N, 4.06.

**1-(2-Iodo-2-(p-tolyl)ethoxy)pyrrolidine-2,5-dione (3bb).** White solid: 39% yield (70 mg); mp = 126-127 °C (dec).  $^1\text{H}$  NMR (300.13 MHz,  $\text{CDCl}_3$ ):  $\delta = 7.37$  (d,  $J = 8.0$  Hz, 2H), 7.13 (d,  $J = 8.0$  Hz, 2H), 5.43 (dd,  $J_1 = 10.3$  Hz,  $J_2 = 5.3$  Hz, 1H), 4.89 (dd,  $J_1 = 10.6$  Hz,  $J_2 = 10.3$  Hz, 1H), 4.54 (dd,  $J_1 = 10.6$  Hz,  $J_2 = 5.3$  Hz, 1H), 2.53-2.41 (m, 4H), 2.31 (s, 3H).  $^{13}\text{C}$  NMR (75.47 MHz,  $\text{CDCl}_3$ ):  $\delta = 170.8, 138.8, 137.0, 129.7, 127.6, 79.5, 25.4, 21.4$ . IR (KBr)  $\nu(\text{cm}^{-1})$ : 1724, 1707, 1214, 1085, 997, 811, 657, 562. Anal. Calcd for  $\text{C}_{13}\text{H}_{14}\text{INO}_3$ : C, 43.47; H, 3.93; N, 3.90. Found: C, 43.55; H, 3.95; N, 3.88.

**1-(2-(4-Chlorophenyl)-2-iodoethoxy)pyrrolidine-2,5-dione (3cb).** White solid: 61% yield (116 mg); mp = 117-118 °C.  $^1\text{H}$  NMR (300.13 MHz,  $\text{CDCl}_3$ ):  $\delta = 7.46$  (d,  $J = 8.5$  Hz, 2H), 7.32 (d,  $J = 8.5$  Hz, 2H), 5.42 (dd,  $J_1 = 10.3$  Hz,  $J_2 = 5.3$  Hz, 1H), 4.84 (dd,  $J_1 = 10.6$  Hz,  $J_2 = 10.3$  Hz, 1H), 4.54 (dd,  $J_1 = 10.6$  Hz,  $J_2 = 5.3$  Hz, 1H), 2.61-2.54 (m, 4H).  $^{13}\text{C}$  NMR (75.47 MHz,  $\text{CDCl}_3$ ):  $\delta = 170.7, 138.5, 134.4, 129.2, 129.16, 79.7, 25.5, 23.4$ . IR (KBr)  $\nu(\text{cm}^{-1})$ : 1709, 1492, 1194, 1092, 1080, 996, 835, 649. HRMS (ESI) Calcd for  $\text{C}_{12}\text{H}_{11}\text{ClINO}_3$   $[\text{M} + \text{Na}]^+ = 401.9364$ , Found 401.9364.

**1-(2-(4-Fluorophenyl)-2-iodoethoxy)pyrrolidine-2,5-dione (3db).** White solid: 63% yield (114 mg); mp = 105-106 °C.  $^1\text{H}$  NMR (300.13 MHz,  $\text{CDCl}_3$ ):  $\delta = 7.52$ -7.45 (m, 2H), 7.07-6.97 (m, 2H), 5.43 (dd,  $J_1 = 10.2$  Hz,  $J_2 = 5.3$  Hz, 1H), 4.82 (dd,  $J_1 = 10.6$  Hz,  $J_2 = 10.2$  Hz, 1H), 4.53 (dd,  $J_1 = 10.6$  Hz,  $J_2 = 5.3$  Hz, 1H), 2.61-2.52 (m, 4H).  $^{13}\text{C}$  NMR (75.47 MHz,  $\text{CDCl}_3$ ):  $\delta = 170.7, 162.5$  (d,  $J = 249.0$  Hz), 135.8 (d,  $J = 3.4$  Hz), 129.7 (d,  $J = 8.4$  Hz), 116.0 (d,  $J = 21.9$  Hz), 79.9, 25.45, 23.8.  $^{19}\text{F}$  NMR (282.40 MHz,  $\text{CDCl}_3$ ):  $\delta = -112.2$  (1F). IR (KBr)  $\nu(\text{cm}^{-1})$ : 1726, 1707, 1601, 1509, 1208, 1082, 840, 812, 652. Anal. Calcd for  $\text{C}_{12}\text{H}_{11}\text{FINO}_3$ : C, 39.69; H, 3.05; N, 3.86. Found: C, 39.70; H, 3.03; N, 3.86.

**1-(2-(3-Bromophenyl)-2-iodoethoxy)pyrrolidine-2,5-dione (3fb).** White solid: 34% yield (72 mg); mp = 184-185 °C.  $^1\text{H}$  NMR (300.13 MHz,  $\text{DMSO}-d_6$ ):  $\delta = 7.76$  (t,  $J = 1.7$  Hz, 1H), 7.57-7.51 (m, 1H), 7.49-7.44 (m, 1H), 7.30 (t,  $J = 7.8$  Hz, 1H), 5.54 (dd,  $J_1 = 9.8$  Hz,  $J_2 = 5.7$  Hz, 1H), 4.72 (dd,  $J_1 = 11.0$  Hz,  $J_2 = 9.8$  Hz, 1H), 4.48 (dd,  $J_1 = 11.0$  Hz,  $J_2 = 5.7$

Hz, 1H), 2.59-2.53 (m, 4H).  $^{13}\text{C}$  NMR (75.47 MHz, DMSO- $d_6$ ):  $\delta$  = 171.7, 143.2, 130.9, 130.7, 130.4, 127.1, 121.4, 78.6, 25.4, 24.5. IR (KBr)  $\nu(\text{cm}^{-1})$ : 1725, 1707, 1211, 1202, 1083, 809, 789, 693, 670, 660. Anal. Calcd for  $\text{C}_{12}\text{H}_{11}\text{BrINO}_3$ : C, 33.99; H, 2.61; N, 3.30. Found: C, 34.02; H, 2.69; N, 3.26.

**1-(2-Iodo-2-(perfluorophenyl)ethoxy)pyrrolidine-2,5-dione (3hb).** White solid: 60% yield (130 mg); mp = 110-111 °C.  $^1\text{H}$  NMR (300.13 MHz,  $\text{CDCl}_3$ ):  $\delta$  = 5.56 (dd,  $J_1$  = 10.7 Hz,  $J_2$  = 5.8 Hz, 1H), 4.81 (t,  $J$  = 10.7 Hz, 1H), 4.59 (dd,  $J_1$  = 10.7 Hz,  $J_2$  = 5.8 Hz, 1H), 2.76-2.64 (m, 4H).  $^{13}\text{C}$  NMR (75.47 MHz,  $\text{CDCl}_3$ ):  $\delta$  = 170.6, 146.5-146.2 (m), 144.5-144.2 (m), 142.7-142.4 (m), 140.7-140.4 (m), 139.2-138.8 (m), 137.1-136.8 (m), 113.9 (td,  $J_1$  = 14.4 Hz,  $J_2$  = 4.2 Hz), 78.8 (t,  $J$  = 3.8 Hz), 25.4, 5.9.  $^{19}\text{F}$  NMR (282.40 MHz,  $\text{CDCl}_3$ ):  $\delta$  = -140.2 (bs, 2F), -152.9 (t,  $J$  = 21.0 Hz, 1F) -161.2 (td,  $J_1$  = 21.0 Hz,  $J_2$  = 6.4 Hz, 2F). IR (KBr)  $\nu(\text{cm}^{-1})$ : 1783, 1727, 1526, 1503, 1365, 1195, 1138, 1123, 1073, 1062, 1040, 1000, 969, 930, 902, 815, 750, 704, 687, 665. Anal. Calcd for  $\text{C}_{12}\text{H}_7\text{F}_5\text{INO}_3$ : C, 33.13; H, 1.62; N, 3.22. Found: C, 33.24; H, 1.61; N, 3.32.

**1-((1-Iodo-2,3-dihydro-1H-inden-2-yl)oxy)pyrrolidine-2,5-dione (3kb).** White solid: 60% yield (107 mg); mp = 147-148 °C (dec).  $^1\text{H}$  NMR (300.13 MHz,  $\text{CDCl}_3$ ):  $\delta$  = 7.46-7.41 (m, 1H), 7.32-7.22 (m, 3H), 5.87 (m, 1H), 5.29 (dt,  $J_1$  = 5.8 Hz,  $J_2$  = 1.5 Hz, 1H), 3.50 (dd,  $J_1$  = 17.5 Hz,  $J_2$  = 5.8 Hz, 1H), 3.34-3.20 (m, 1H), 2.74-2.65 (m, 4H).  $^{13}\text{C}$  NMR (75.47 MHz,  $\text{CDCl}_3$ ):  $\delta$  = 171.5, 142.7, 139.3, 129.2, 128.1, 125.9, 125.1, 95.4, 36.0, 29.7, 25.5. IR (KBr)  $\nu(\text{cm}^{-1})$ : 1730, 1194, 1066, 996, 719, 648. Anal. Calcd for  $\text{C}_{13}\text{H}_{12}\text{INO}_3$ : C, 43.72; H, 3.39; N, 3.92. Found: C, 43.71; H, 3.21; N, 3.93.

#### Gram-scale synthesis of compound 3aa (experimental for Scheme 4)

Iodine (1.27 g, 5 mmol) was added to a stirred mixture of styrene **1a** (1.04 g, 10 mmol) and *N*-hydroxyphthalimide (**2a**, 1.63 g, 10 mmol) in  $\text{CH}_2\text{Cl}_2$  (50 mL) at 20–25 °C. Then,  $\text{PhI}(\text{OAc})_2$  (1.94 g, 6 mmol) was added. After stirring the reaction mixture under air atmosphere at 20–25 °C for 10 minutes the mixture was washed with aqueous solution of  $\text{Na}_2\text{S}_2\text{O}_3 \cdot 5\text{H}_2\text{O}$  (300 mg in 50 mL of water), saturated aqueous  $\text{NaHCO}_3$  solution (50 mL), then with water (50 mL), dried over anhydrous  $\text{MgSO}_4$  and filtered. DCM was rotary evaporated at 20–25 °C under water-jet vacuum (20–30 mmHg). Crude solid product was washed with 2  $\times$  25 mL ice-cold hexane and then recrystallized from DCM – hexane mixture (50 mL, 1:1 v/v) at 30–35 °C. Yield of **3aa** – 3.1 g (79%), mp = 136–137

°C. Anal. Calcd for C<sub>16</sub>H<sub>12</sub>INO<sub>3</sub>: C, 48.88; H, 3.08; N, 3.56. Found: C, 48.88; H, 3.05; N, 3.56.

#### Synthesis of compound 4a

To a stirred solution of **3aa** (197 mg, 0.5 mmol) in CH<sub>2</sub>Cl<sub>2</sub>/MeOH (1/1 v/v, 5.0 mL) *m*CPBA (148 mg, 0.6 mmol) was added, and the reaction mixture was vigorously stirred at 20–25 °C for 24 h. Then CH<sub>2</sub>Cl<sub>2</sub> (20 mL) was added and the reaction mixture was washed with aqueous solution of Na<sub>2</sub>S<sub>2</sub>O<sub>3</sub>·5H<sub>2</sub>O (200 mg in 20 mL of water), water (20 mL), dried over anhydrous MgSO<sub>4</sub>, the solvent was rotary evaporated at 45–50 °C under water-jet vacuum (20–30 mmHg). Compound **4a** was analytically pure and no further purification was performed.

**2-(2-Methoxy-2-phenylethoxy)isoindoline-1,3-dione (4a)**. White solid: 87% yield (129 mg); mp = 127–128 °C. <sup>1</sup>H NMR (300.13 MHz, CDCl<sub>3</sub>): δ = 7.90–7.69 (m, 4H), 7.46–7.29 (m, 5H), 4.71 (dd, *J*<sub>1</sub> = 2.6 Hz, *J*<sub>2</sub> = 8.8 Hz, 1H), 4.42 (dd, *J*<sub>1</sub> = 8.8 Hz, *J*<sub>2</sub> = 11.5 Hz, 1H), 4.12 (dd, *J*<sub>1</sub> = 2.6 Hz, *J*<sub>2</sub> = 11.5 Hz, 1H), 3.25 (s, 3H). <sup>13</sup>C NMR (75.47 MHz, CDCl<sub>3</sub>): δ = 163.5, 137.5, 134.5, 129.2, 128.8, 128.6, 127.1, 123.6, 82.3, 81.2, 57.1. IR (KBr) ν(cm<sup>-1</sup>): 1785, 1731, 1464, 1451, 1376, 1186, 1138, 1083, 991, 764, 701. HRMS (ESI) Calcd for C<sub>17</sub>H<sub>15</sub>NO<sub>4</sub> [M + NH<sub>4</sub>]<sup>+</sup> = 315.1339, Found 315.1352.

#### Synthesis of compound 4b

To a stirred solution of **3aa** (197 mg, 0.50 mmol) in DMF (3.0 mL) sodium benzenesulfonate (820 mg, 5.0 mmol) was added, and the reaction mixture was vigorously stirred at 60 °C for 6 h. Upon completion of the reaction water (20 mL) was added and reaction mixture was extracted with an EtOAc/hexane mixture (1:1 v/v) (2 × 10 mL), the combined extracts were washed with water (3 × 20 mL), dried over anhydrous MgSO<sub>4</sub>, the solvent was rotary evaporated at 45–50 °C under water-jet vacuum (20–30 mmHg). Compound **4b** was isolated by column chromatography on silica gel using EtOAc – DCM eluent (5% volume part of EtOAc).

**(1-Phenylethane-1,2-diyldisulfonyl)dibenzene (4b)**. White solid: 69% yield (134 mg); mp = 179–180 °C (lit. 179 °C) [4]. <sup>1</sup>H NMR (300.13 MHz, CDCl<sub>3</sub>): δ = 7.61–7.24 (m, 10H), 7.18 (t, *J* = 7.4 Hz, 1H), 7.04 (t, *J* = 7.6 Hz, 2H), 6.91 (d, *J* = 7.6 Hz, 2H), 4.62 (dd, *J*<sub>1</sub> = 11.8 Hz, *J*<sub>2</sub> = 2.3 Hz, 1H), 4.18 (dd, *J*<sub>1</sub> = 14.4 Hz, *J*<sub>2</sub> = 2.3 Hz, 1H), 3.99 (dd, *J*<sub>1</sub> = 14.4 Hz, *J*<sub>2</sub> = 11.8 Hz, 1H). <sup>13</sup>C NMR (75.47 MHz, CDCl<sub>3</sub>): 139.2, 136.0, 134.3, 133.8,

130.0, 129.4, 129.3, 129.25, 129.2, 128.05, 128.6, 128.0, 66.5, 53.9. IR (KBr)  $\nu(\text{cm}^{-1})$ : 1308, 1146, 1080, 750, 727, 696, 685, 538, 528. Anal. Calcd for  $\text{C}_{20}\text{H}_{18}\text{S}_2\text{O}_4$ : C, 62.16; H, 4.69. Found: C, 62.17; H, 4.75. HRMS (ESI) Calcd for  $\text{C}_{20}\text{H}_{18}\text{S}_2\text{O}_4$   $[\text{M} + \text{Na}]^+ = 409.0539$ , Found 409.0544.

### Synthesis of compound 4c

To a stirred solution of **3ab** (173 mg, 0.50 mmol) in DMF (3.0 mL)  $\text{NaN}_3$  (325 mg, 5.0 mmol) was added, and the reaction mixture was vigorously stirred at 20–25 °C for 12 h. Then water (20 mL) was added and reaction mixture was extracted with of EtOAc/hexane mixture (1:1 v/v) ( $2 \times 10$  mL), combined extracts were washed with water ( $3 \times 20$  mL), dried over anhydrous  $\text{MgSO}_4$ , solvent was rotary evaporated at 45–50 °C under water-jet vacuum (20–30 mmHg). Compound **4c** was analytically pure and no further purification was performed.

**1-(2-azido-2-phenylethoxy)pyrrolidine-2,5-dione (4c)**. White solid: 86% yield (142 mg); mp = 106–107 °C.  $^1\text{H}$  NMR (300.13 MHz,  $\text{CDCl}_3$ ):  $\delta$  = 7.42–7.29 (m, 5H), 4.95 (dd,  $J_1 = 8.2$  Hz,  $J_2 = 4.5$  Hz, 1H), 4.30–4.19 (m, 2H), 2.68 (s, 4H).  $^{13}\text{C}$  NMR (75.47 MHz,  $\text{CDCl}_3$ ):  $\delta$  = 170.9, 135.2, 129.2, 127.3, 79.3, 64.2, 25.5. IR (KBr)  $\nu(\text{cm}^{-1})$ : 2118, 2092, 2077, 1722, 1709, 1320, 1253, 1234, 1214, 1085, 767, 709, 649. HRMS (ESI) Calcd for  $\text{C}_{12}\text{H}_{12}\text{N}_4\text{O}_3$   $[\text{M} + \text{Na}]^+ = 283.0802$ , Found 283.0792.

### Procedure for the electrochemical studies

Cyclic voltammetry (CV) was implemented on an IPC-Pro computer-assisted potentiostat manufactured by Econix (scan rate error 1.0%; potential setting 0.25 mV). The experiments were performed in a 10 mL five-neck glass conic electrochemical cell with a water jacket for thermostating. CV curves were recorded using a three-electrode scheme. The working electrode was a disc glassy-carbon electrode ( $d = 1.7$  mm). A platinum wire served as an auxiliary electrode. A  $\text{Ag}^+/\text{AgCl}$  electrode was used as the reference electrode and was linked to the solution by a bridge with a porous ceramic diaphragm filled with background electrolyte. The tested solutions were thermostatted at 25  $\pm$  0.5 °C. In a typical case, 5 mL of solution was utilized. The compound concentration was 2  $\text{mmol}\cdot\text{L}^{-1}$  ( $\text{I}_2$  and  $\text{PhI}(\text{OAc})_2$ ) or 4  $\text{mmol}\cdot\text{L}^{-1}$  (NHPI and styrene). The working electrode was polished before recording each CV curve.

## References

1. *Org. Synth.* **1988**, 66. doi: 10.15227/orgsyn.066.0132
2. Frigerio, M.; Santagostino, M.; Sputore, S. *J. Org. Chem.* **1999**, 64, 4537. doi: 10.1021/jo9824596
3. *Org. Synth.* **2000**, 77. doi: 10.15227/orgsyn.077.0141
4. Redman, R. P.; Thomas, P. J.; Stirling, C. J. M. *J. Chem. Soc., Perkin Trans. 2* **1978**, 11, 1135. doi: 10.1039/P29780001135



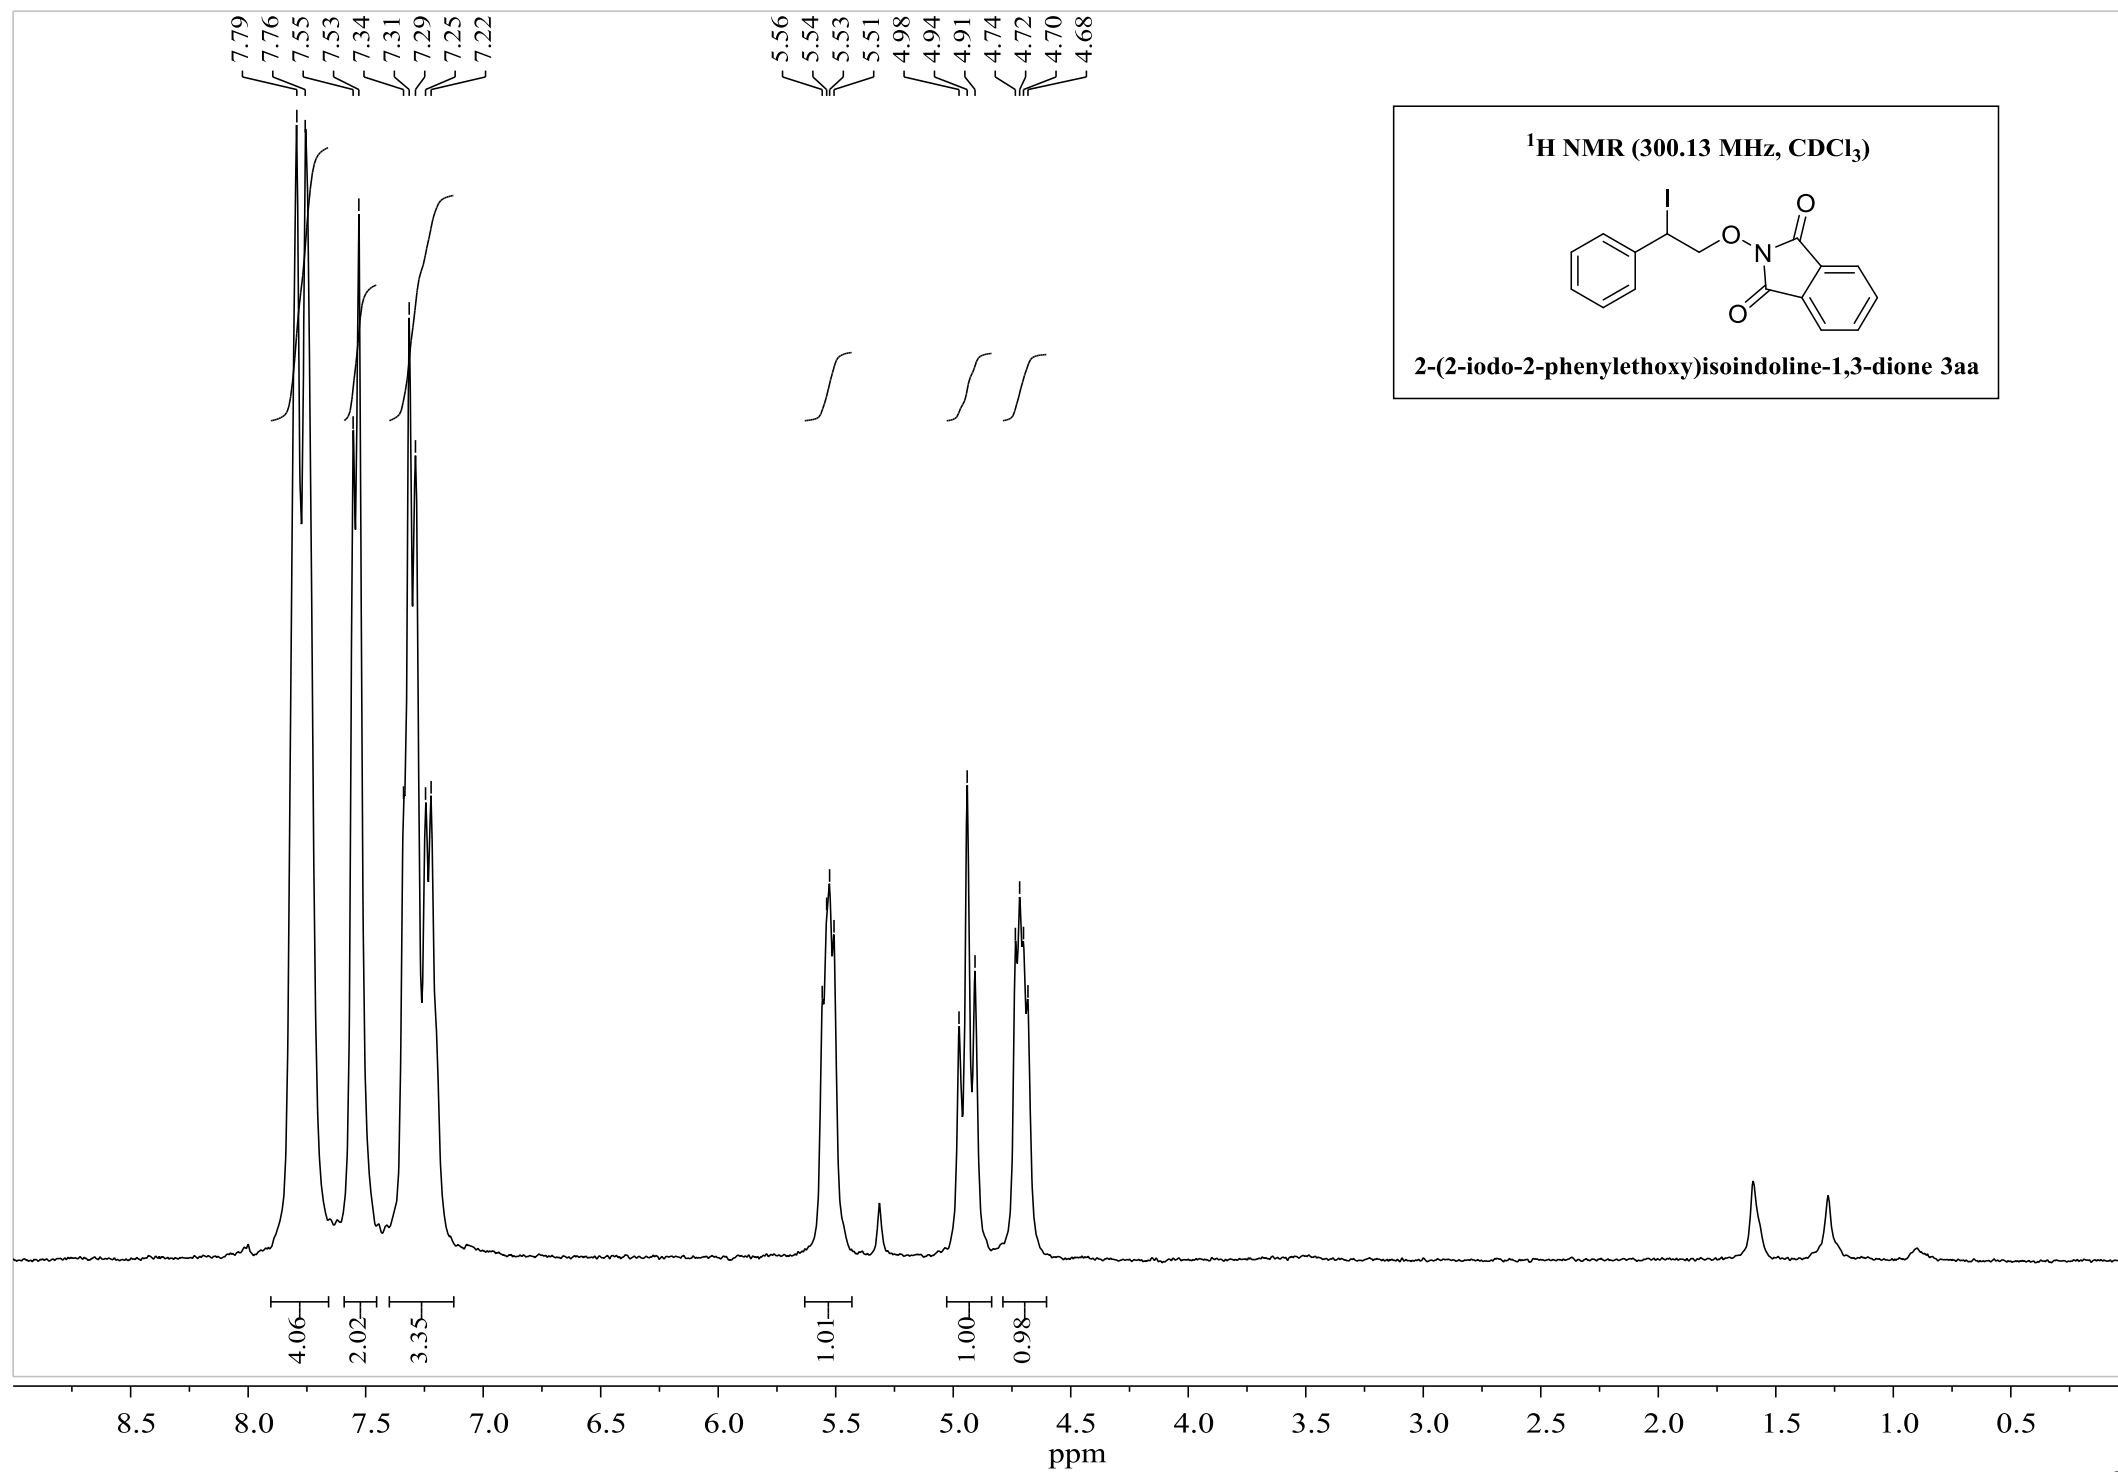

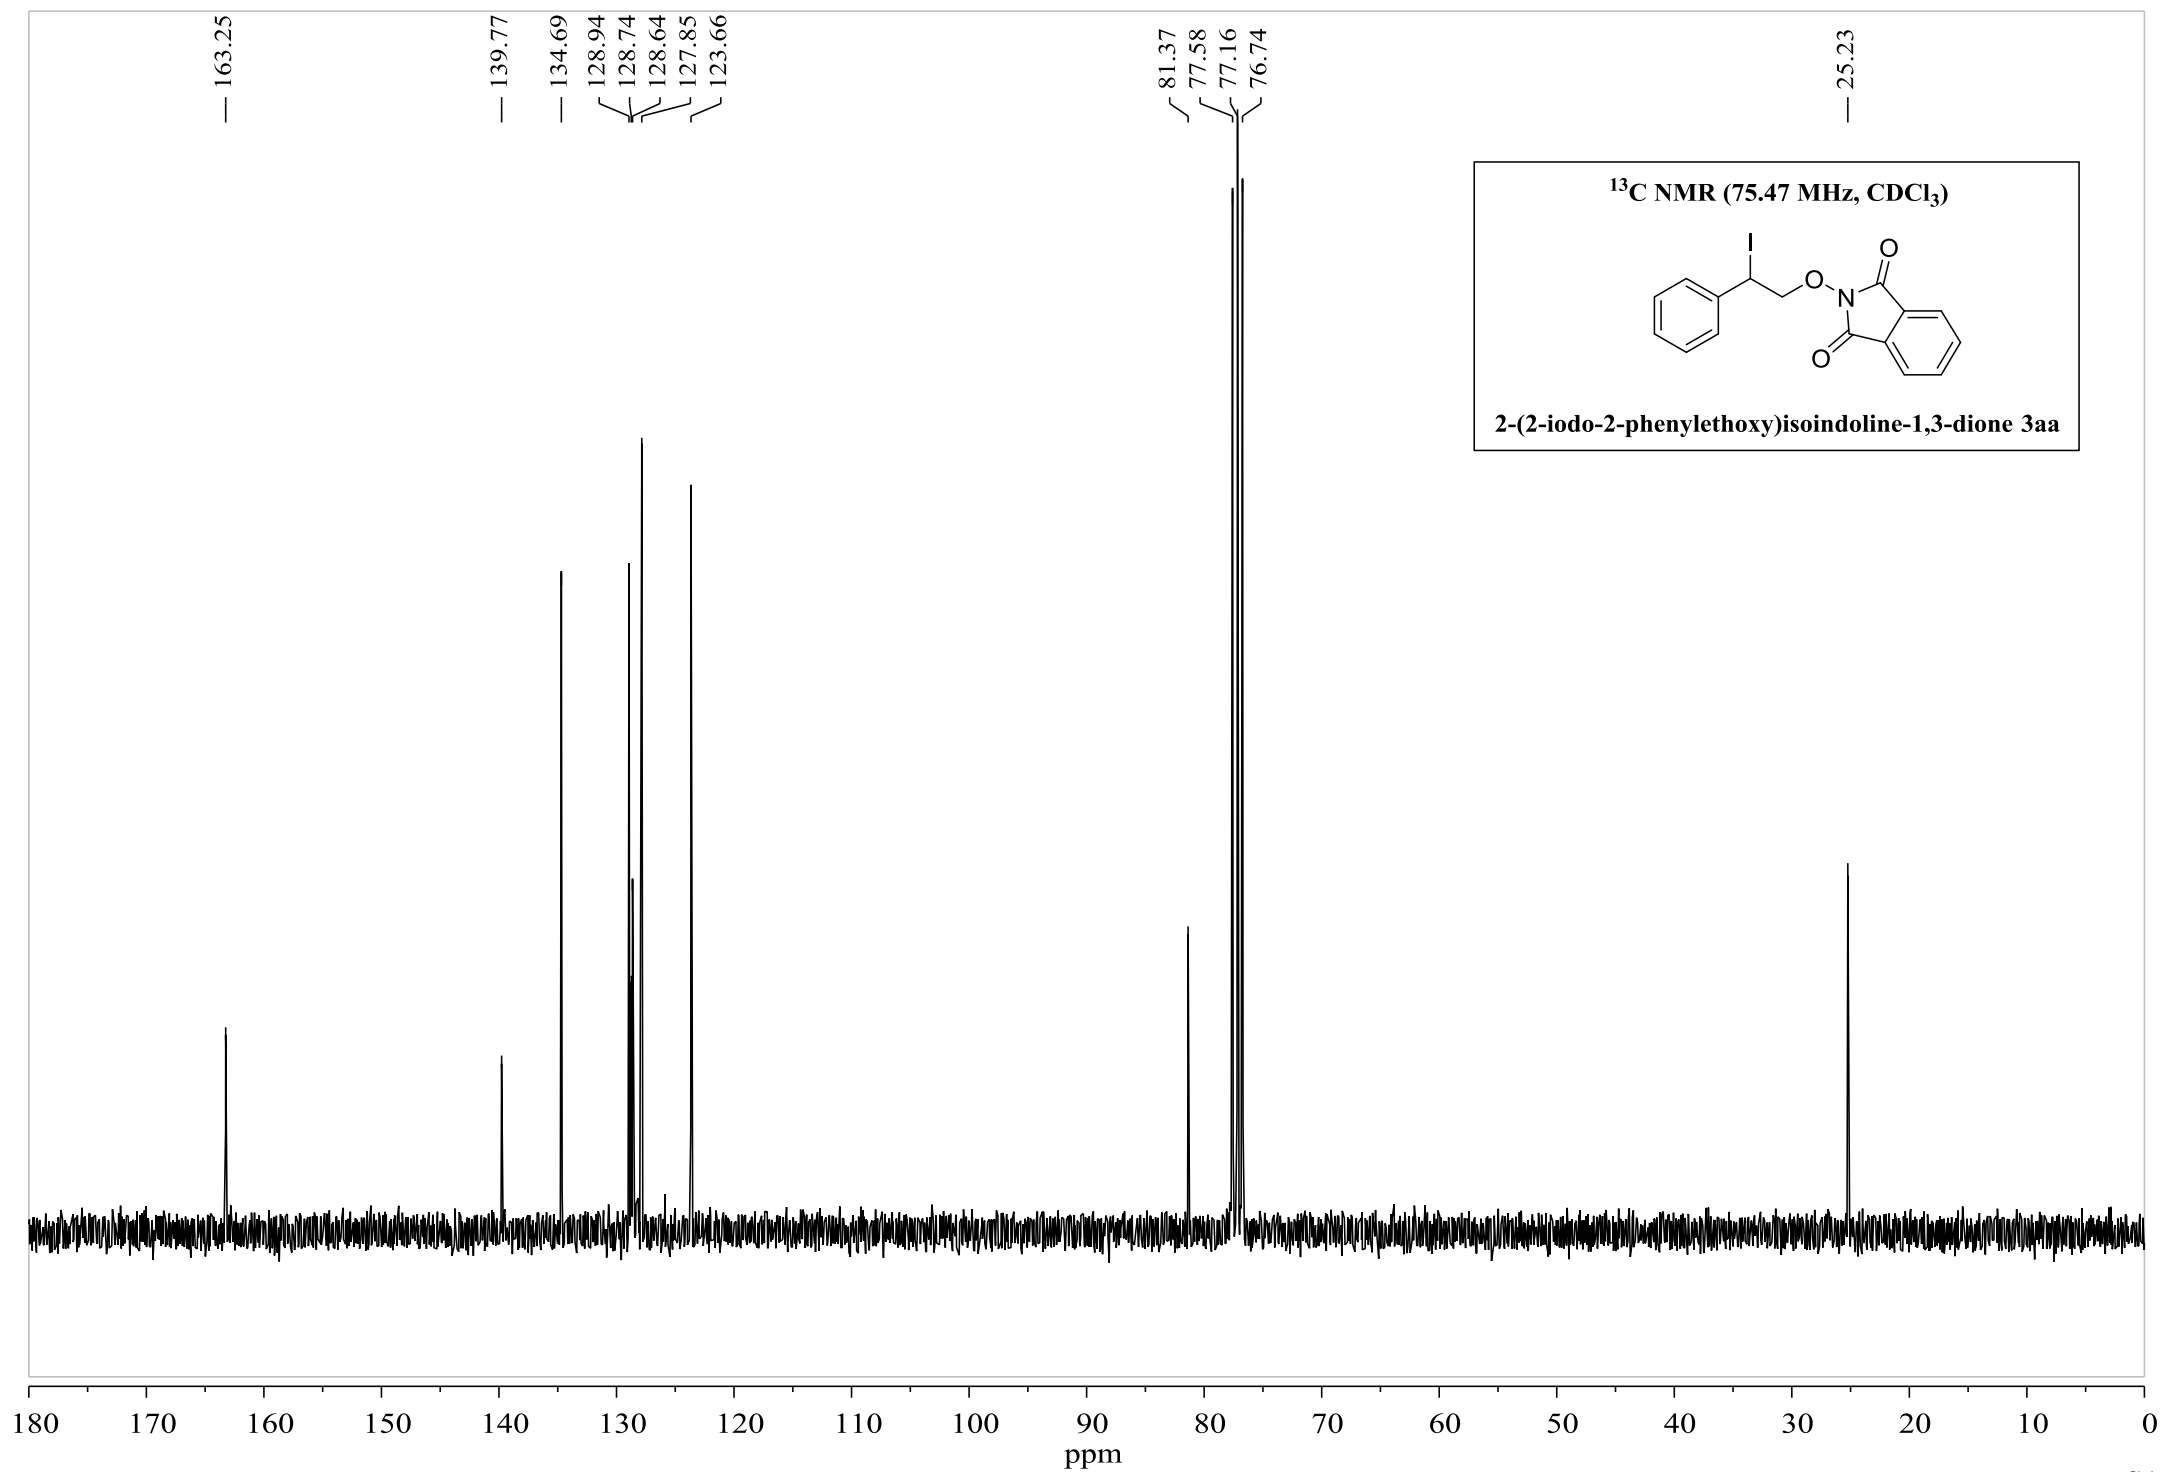

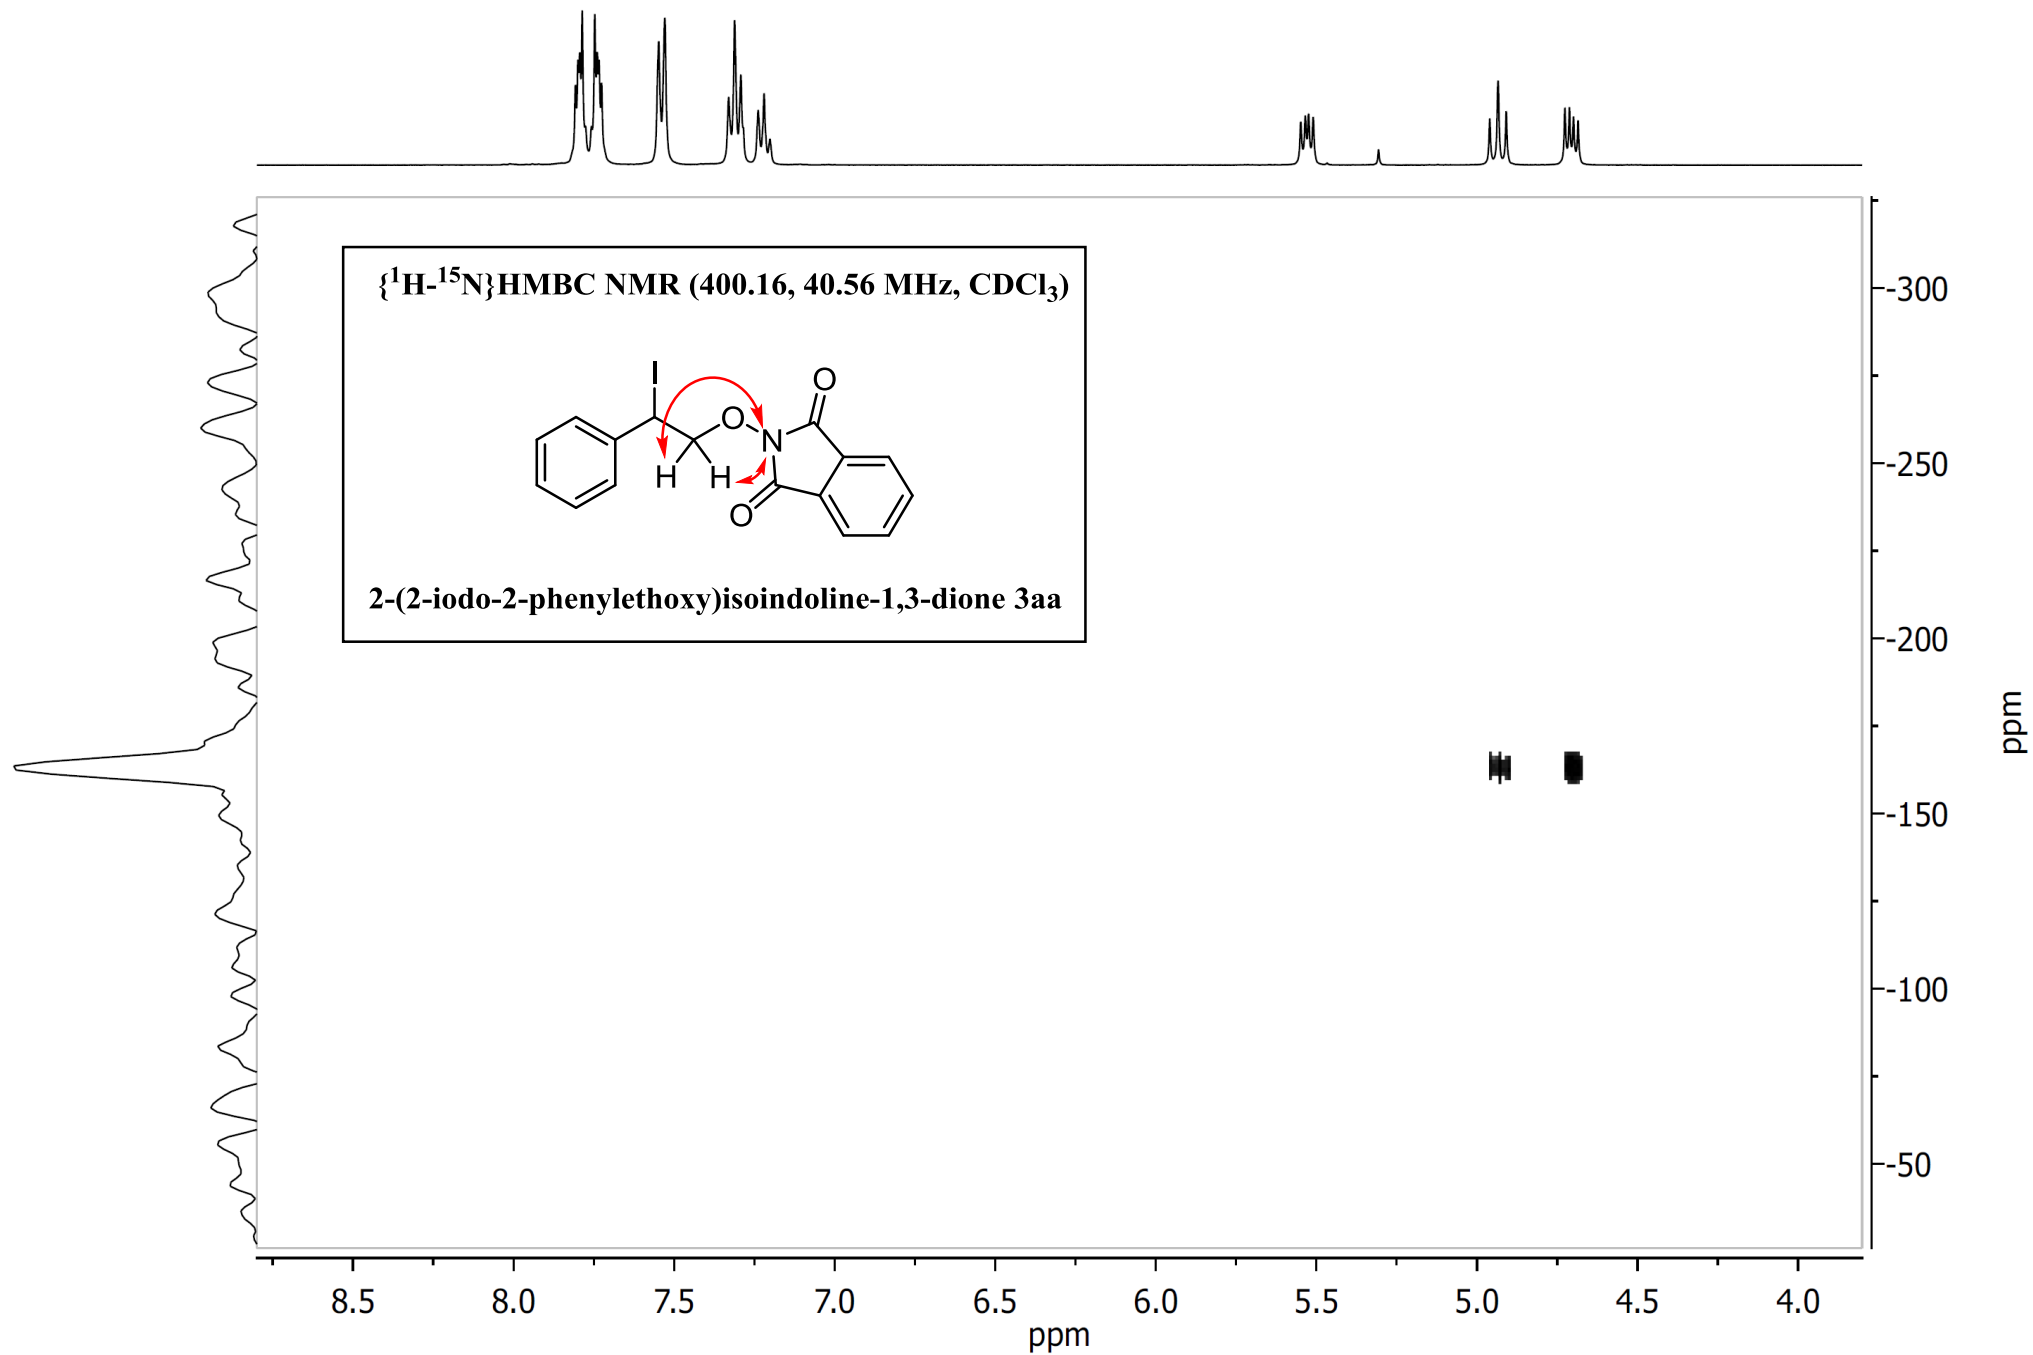

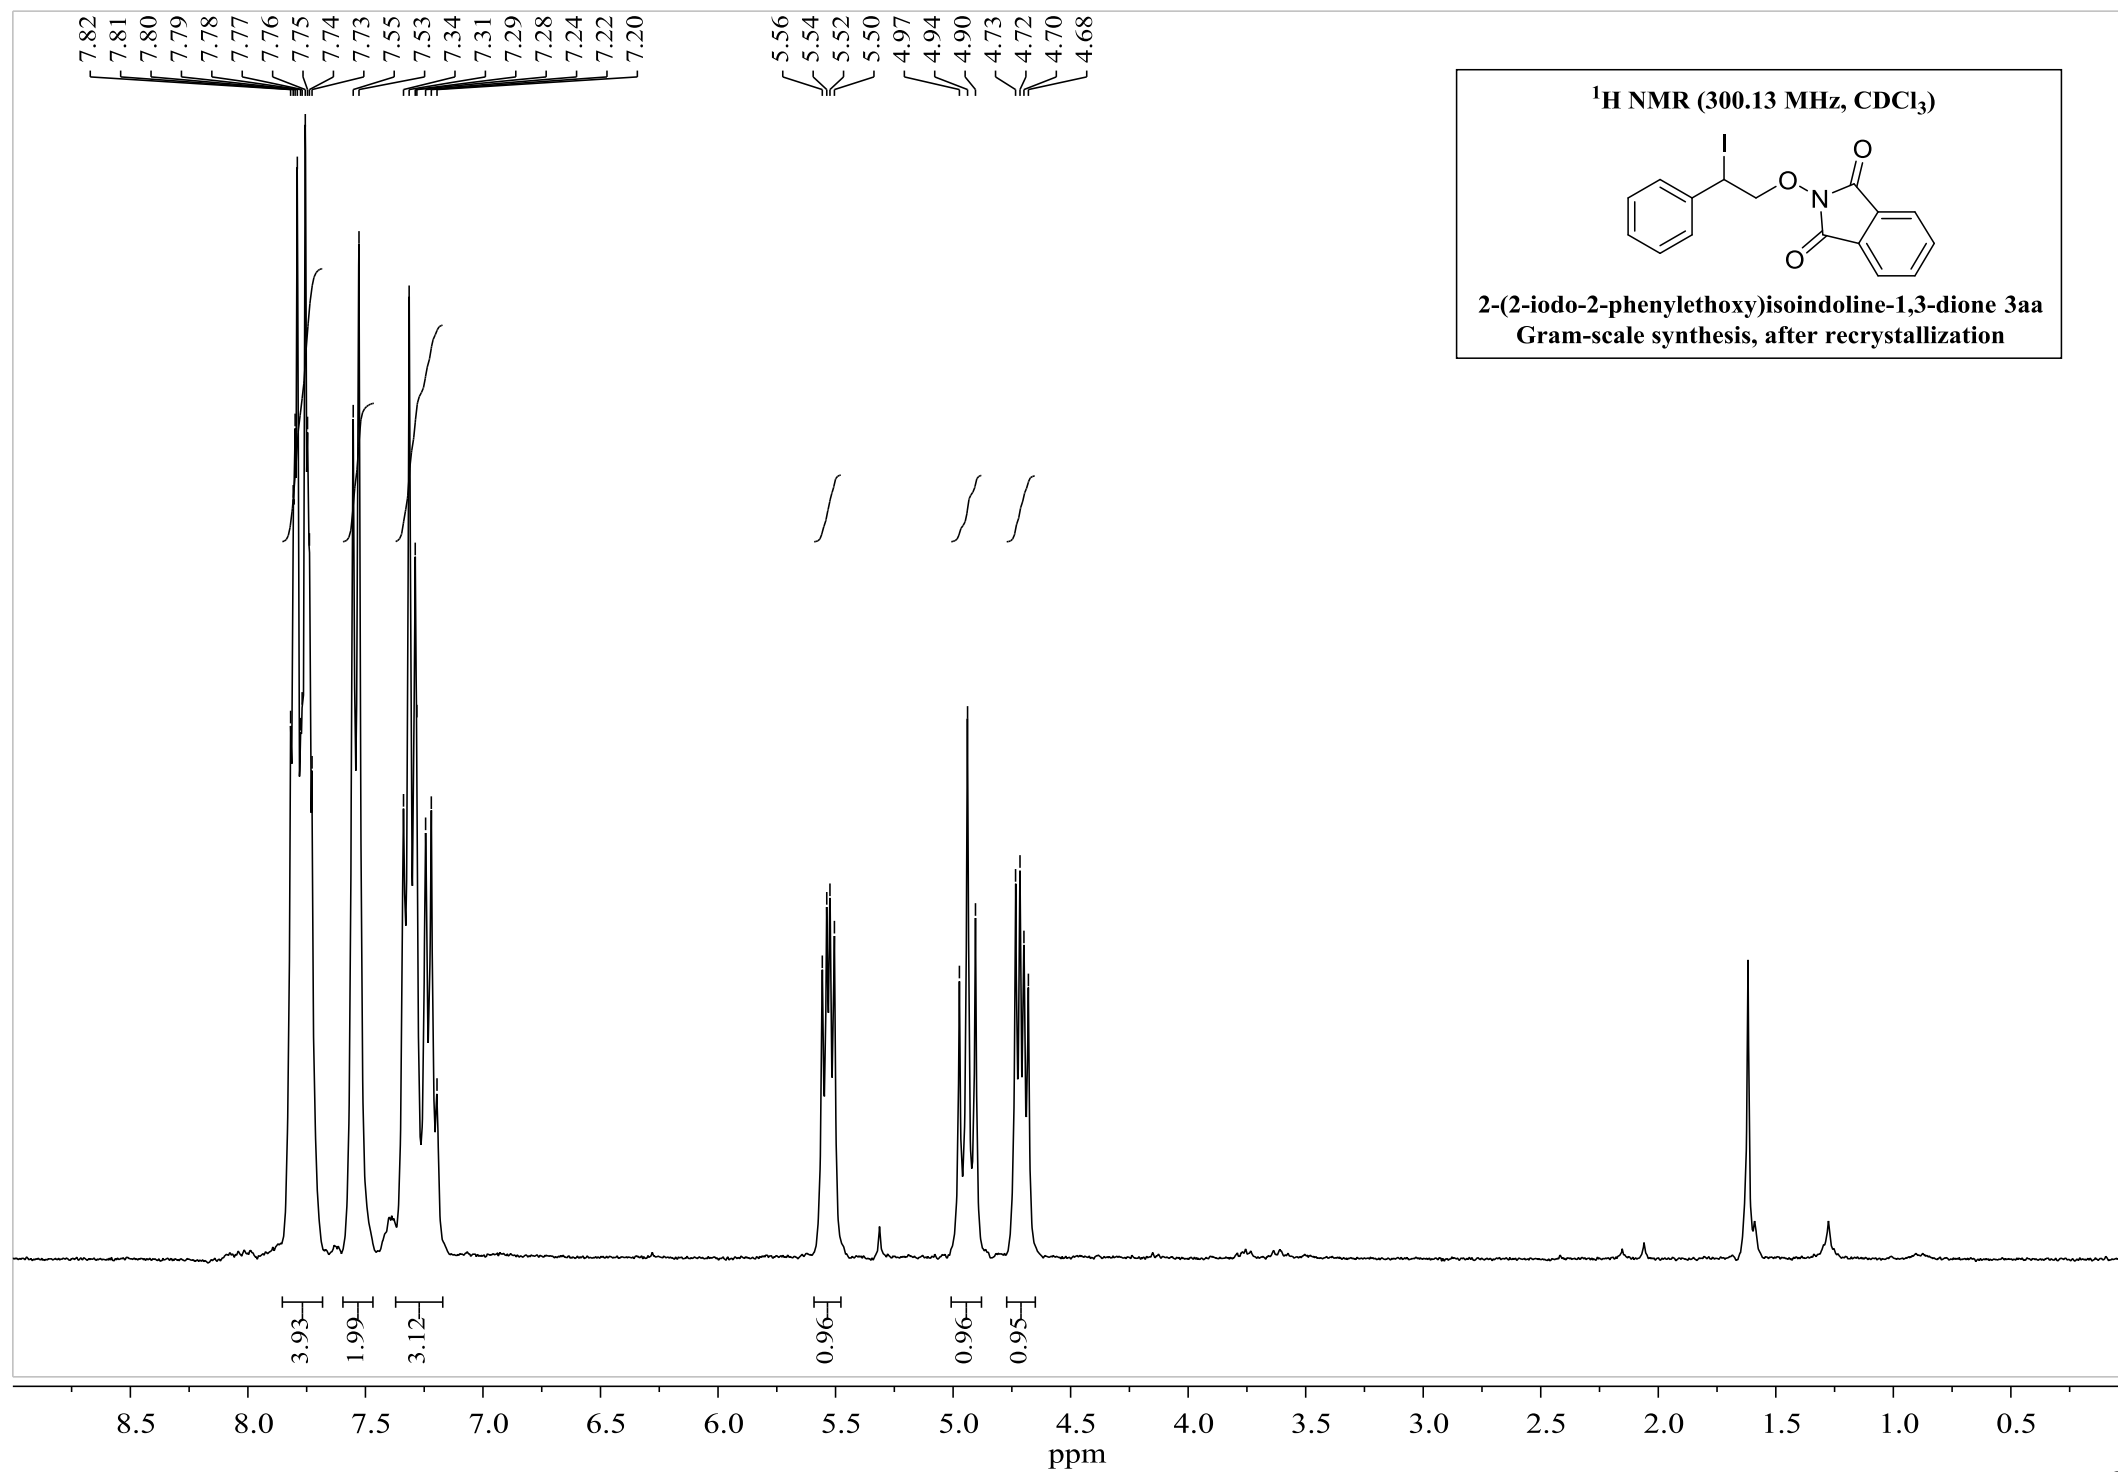

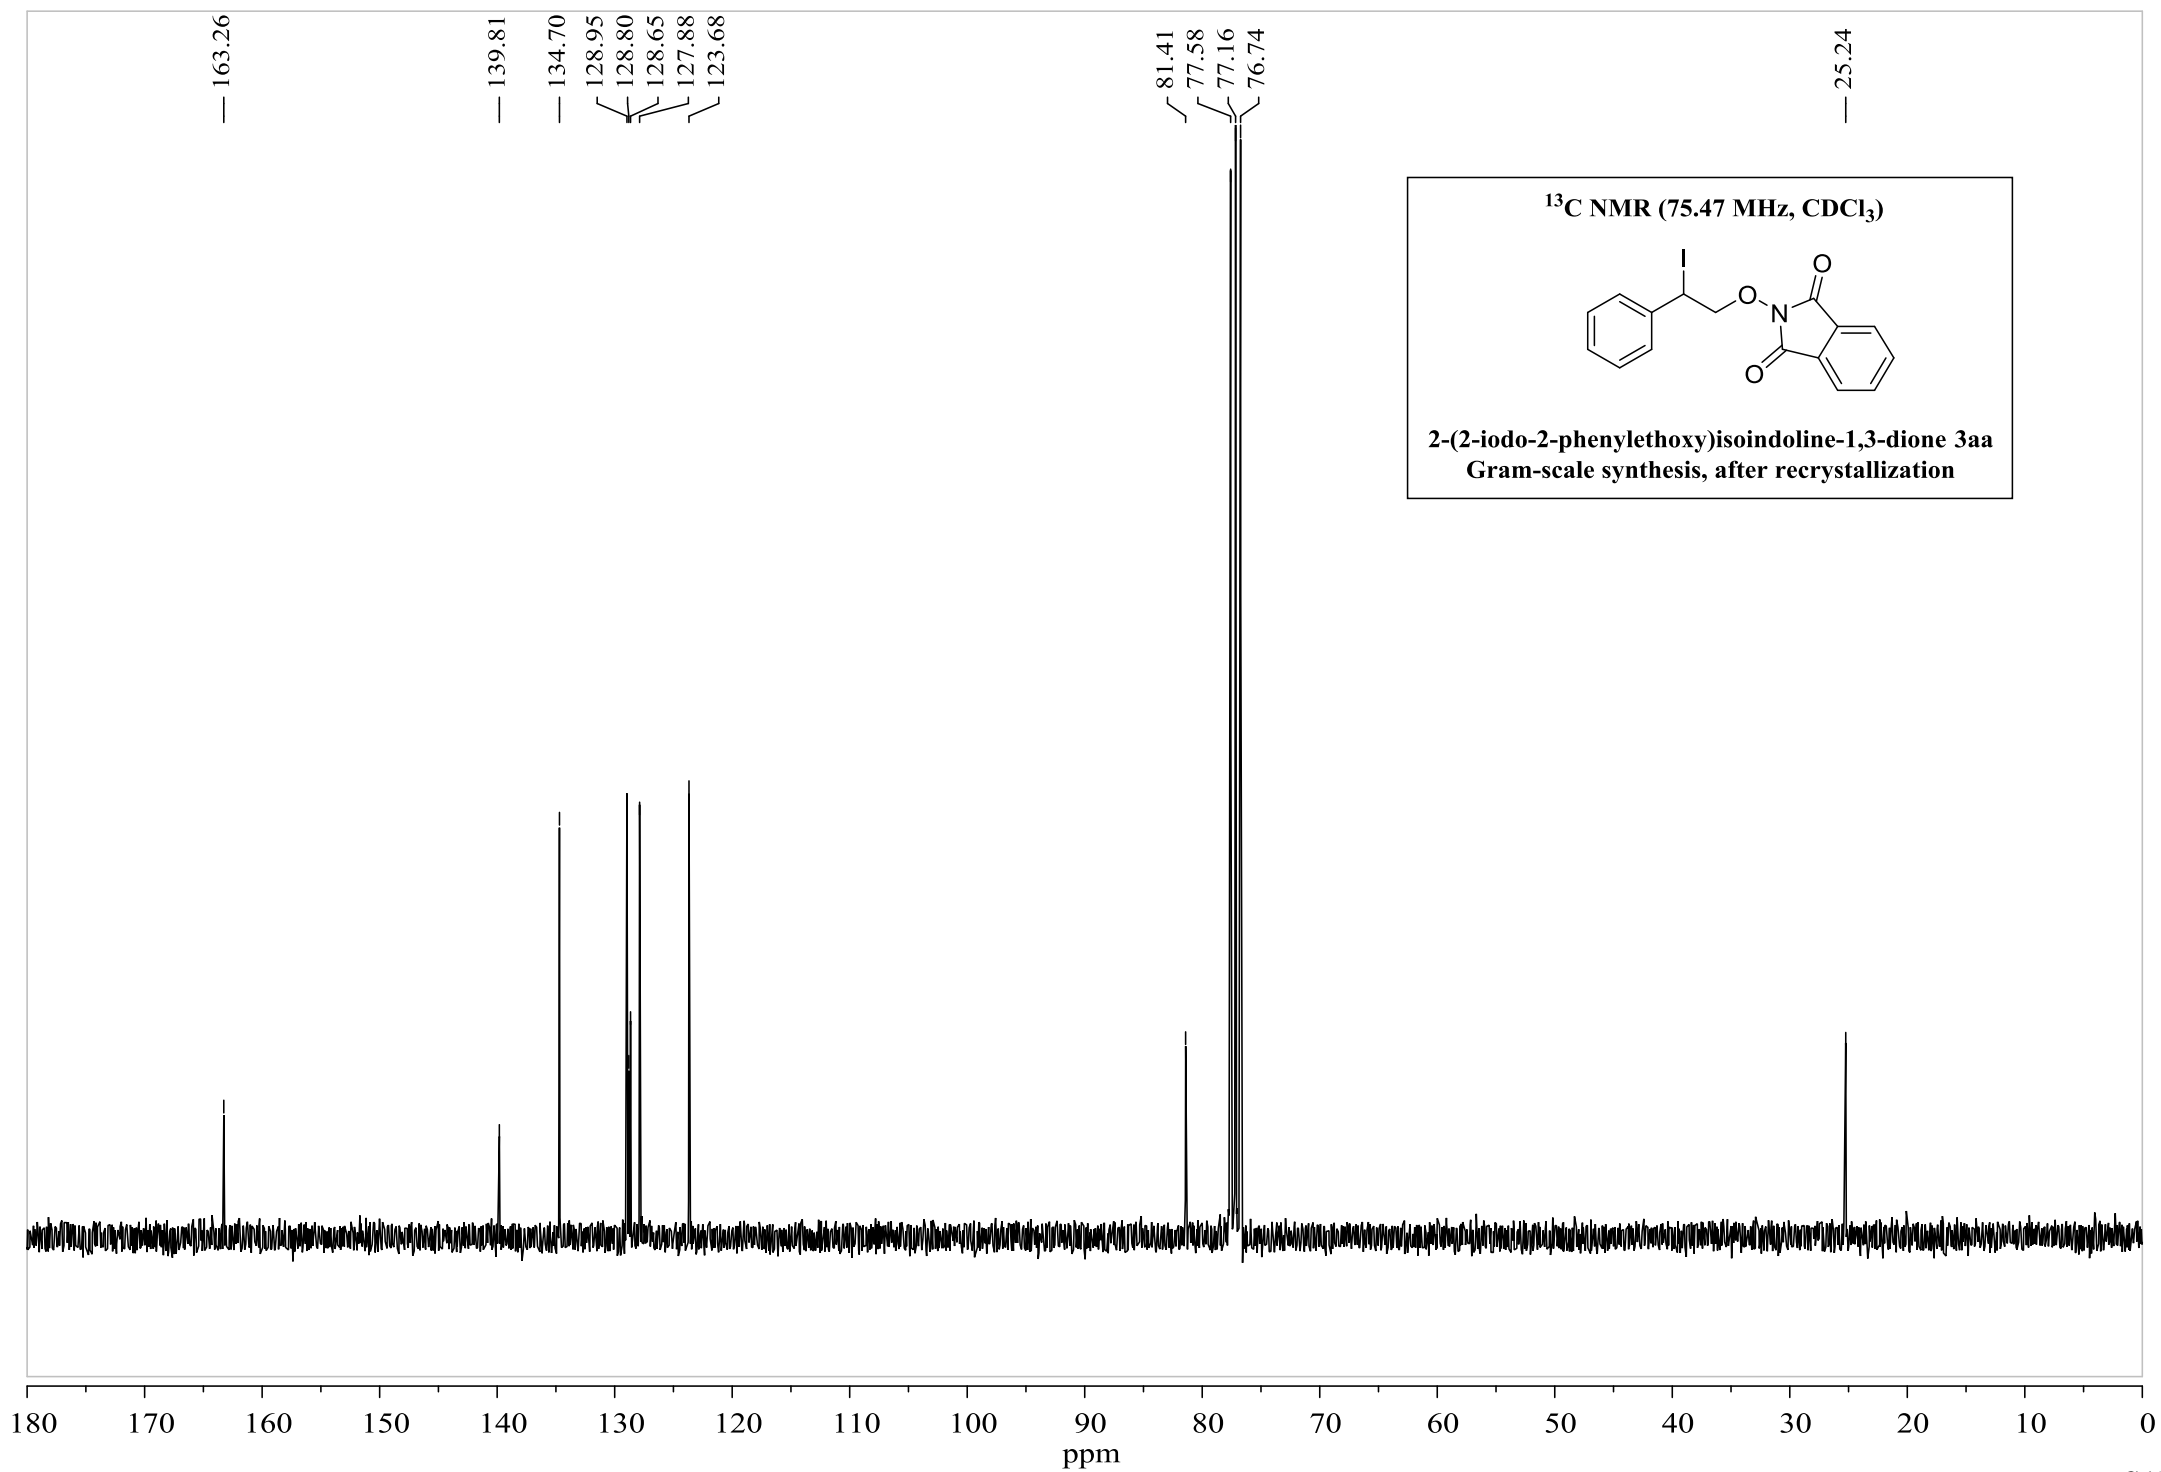

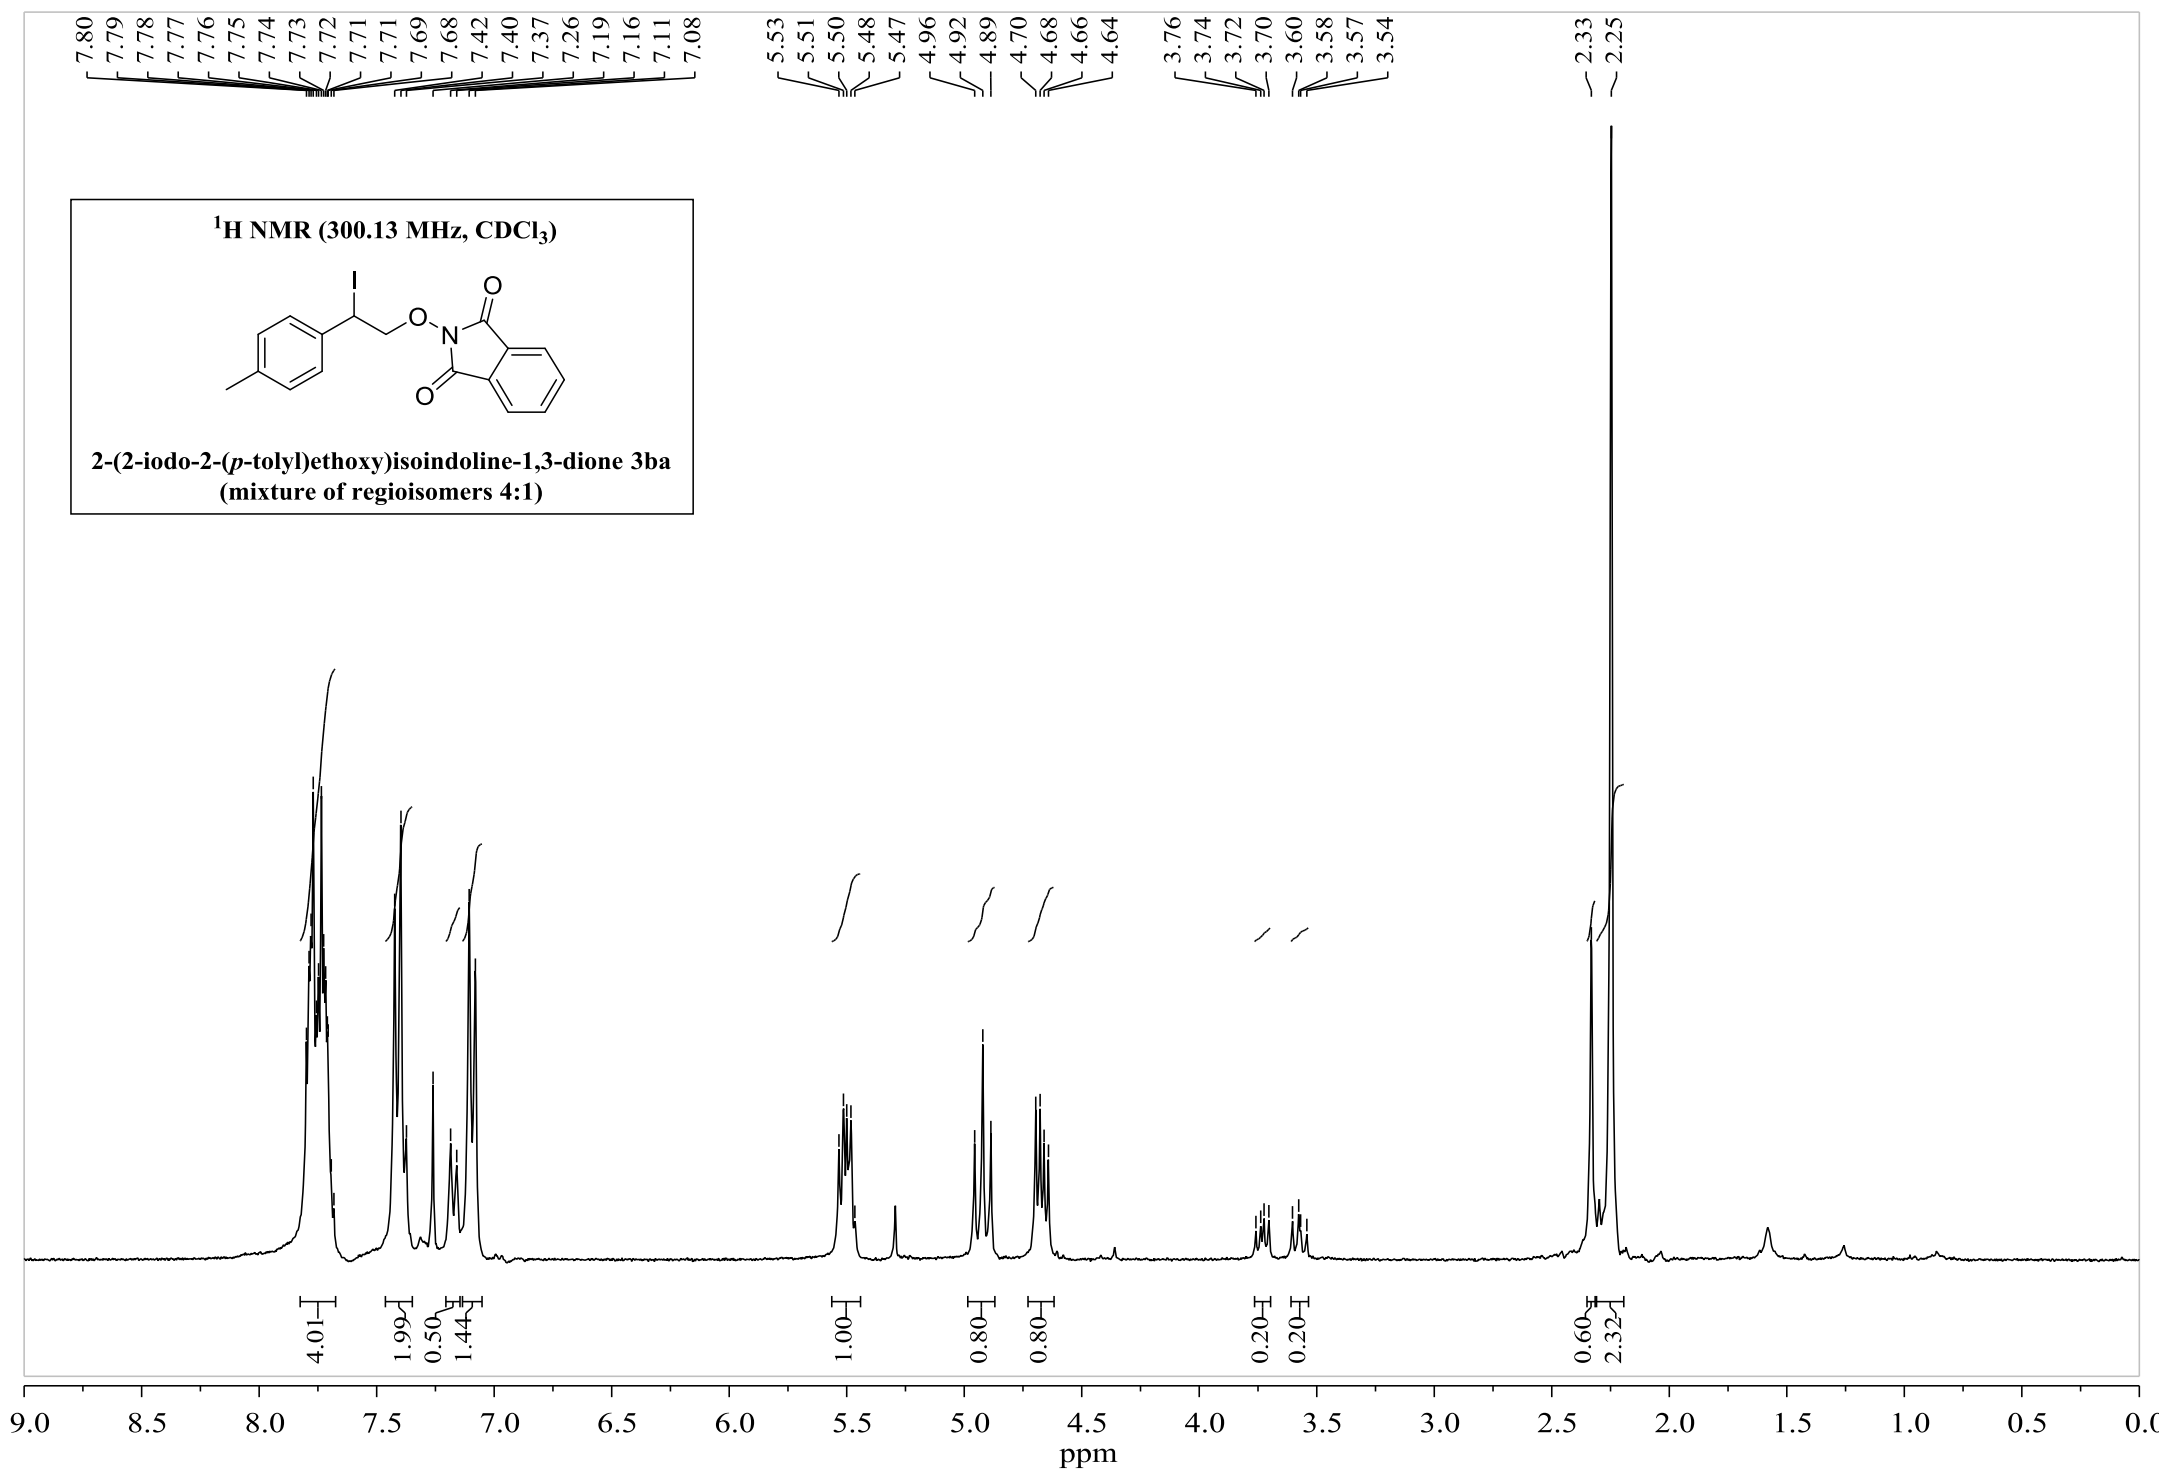

**$^{13}\text{C}$  NMR (75.47 MHz,  $\text{CDCl}_3$ )**

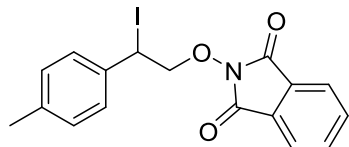

**2-(2-iodo-2-(*p*-tolyl)ethoxy)isoindoline-1,3-dione 3ba  
(major regioisomer)**

— 163.27  
— 138.70  
— 136.84  
— 134.66  
— 129.68  
— 128.81  
— 127.72  
— 123.66

81.28  
77.58  
77.16  
76.74

— 25.62  
— 21.33

180 170 160 150 140 130 120 110 100 90 80 70 60 50 40 30 20 10 0  
ppm

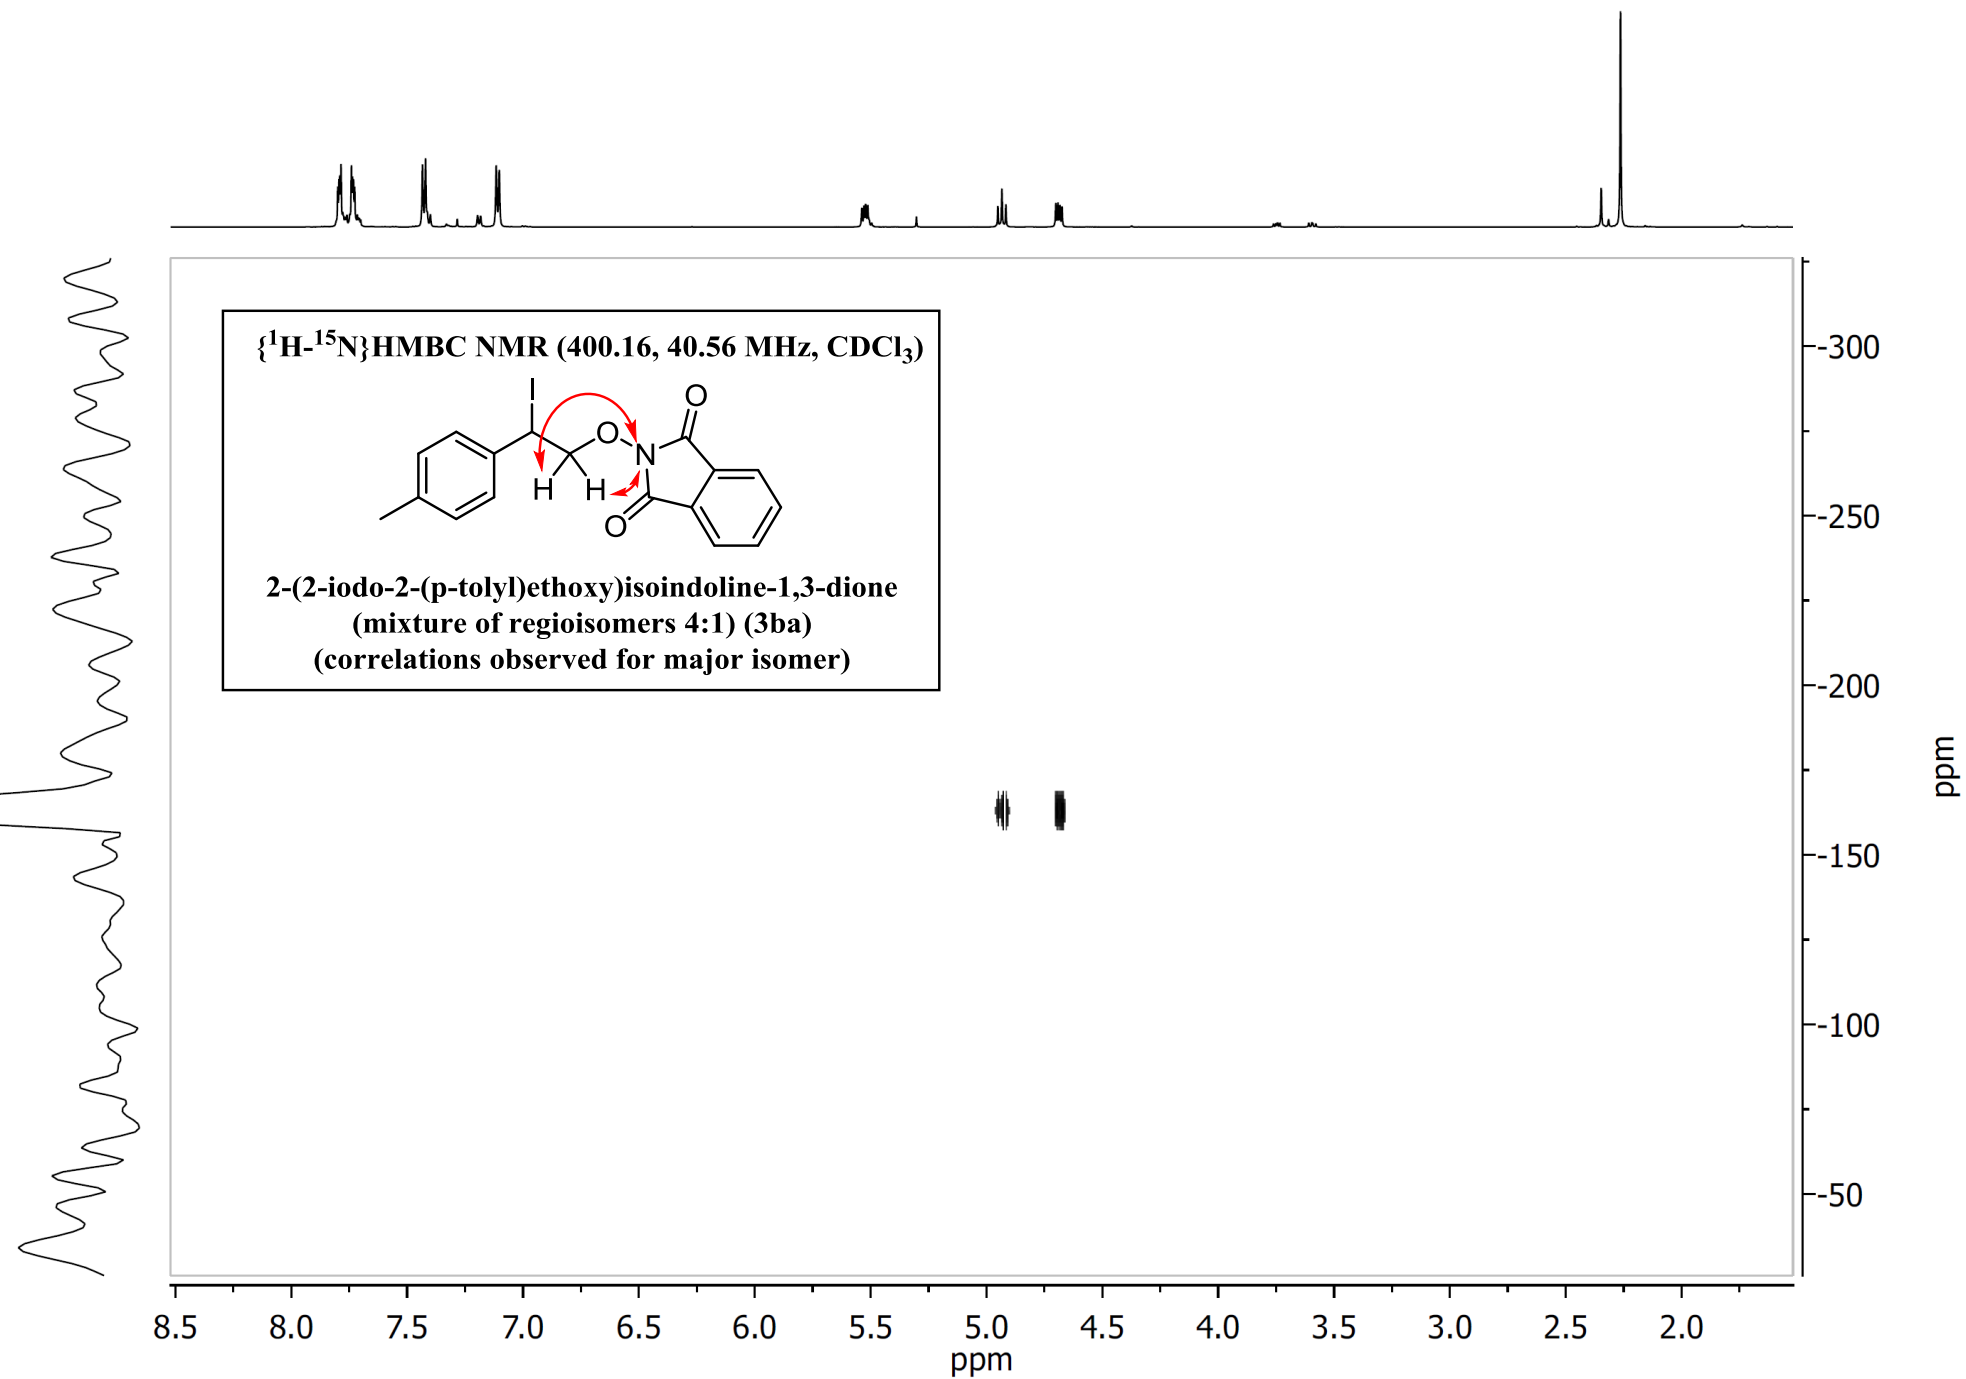



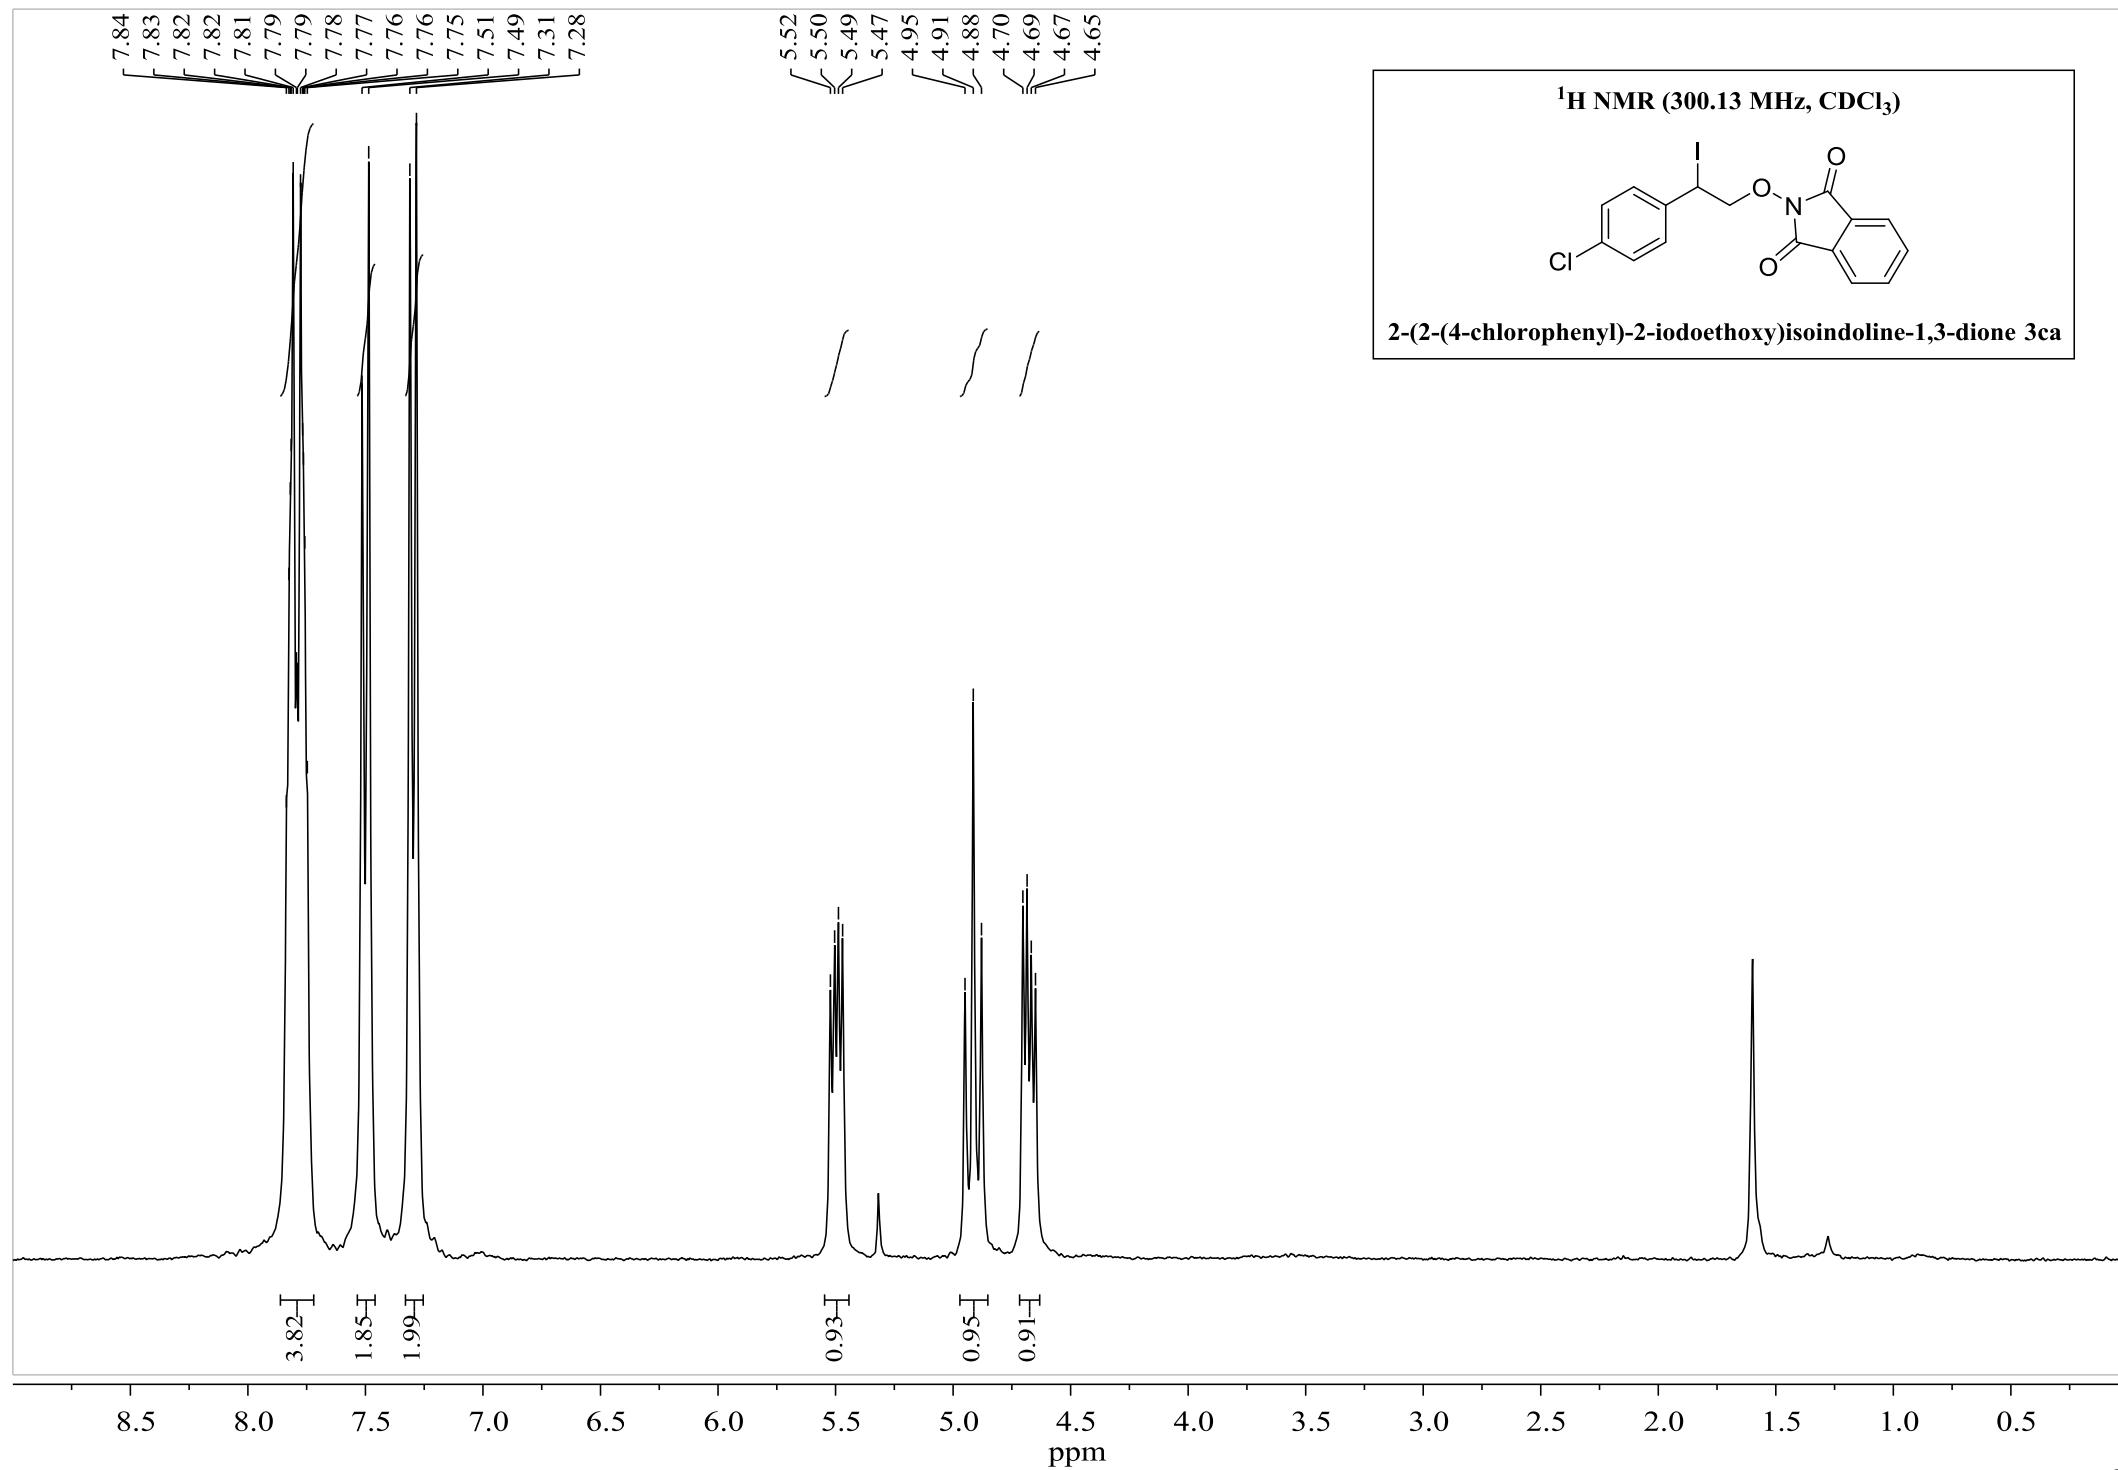

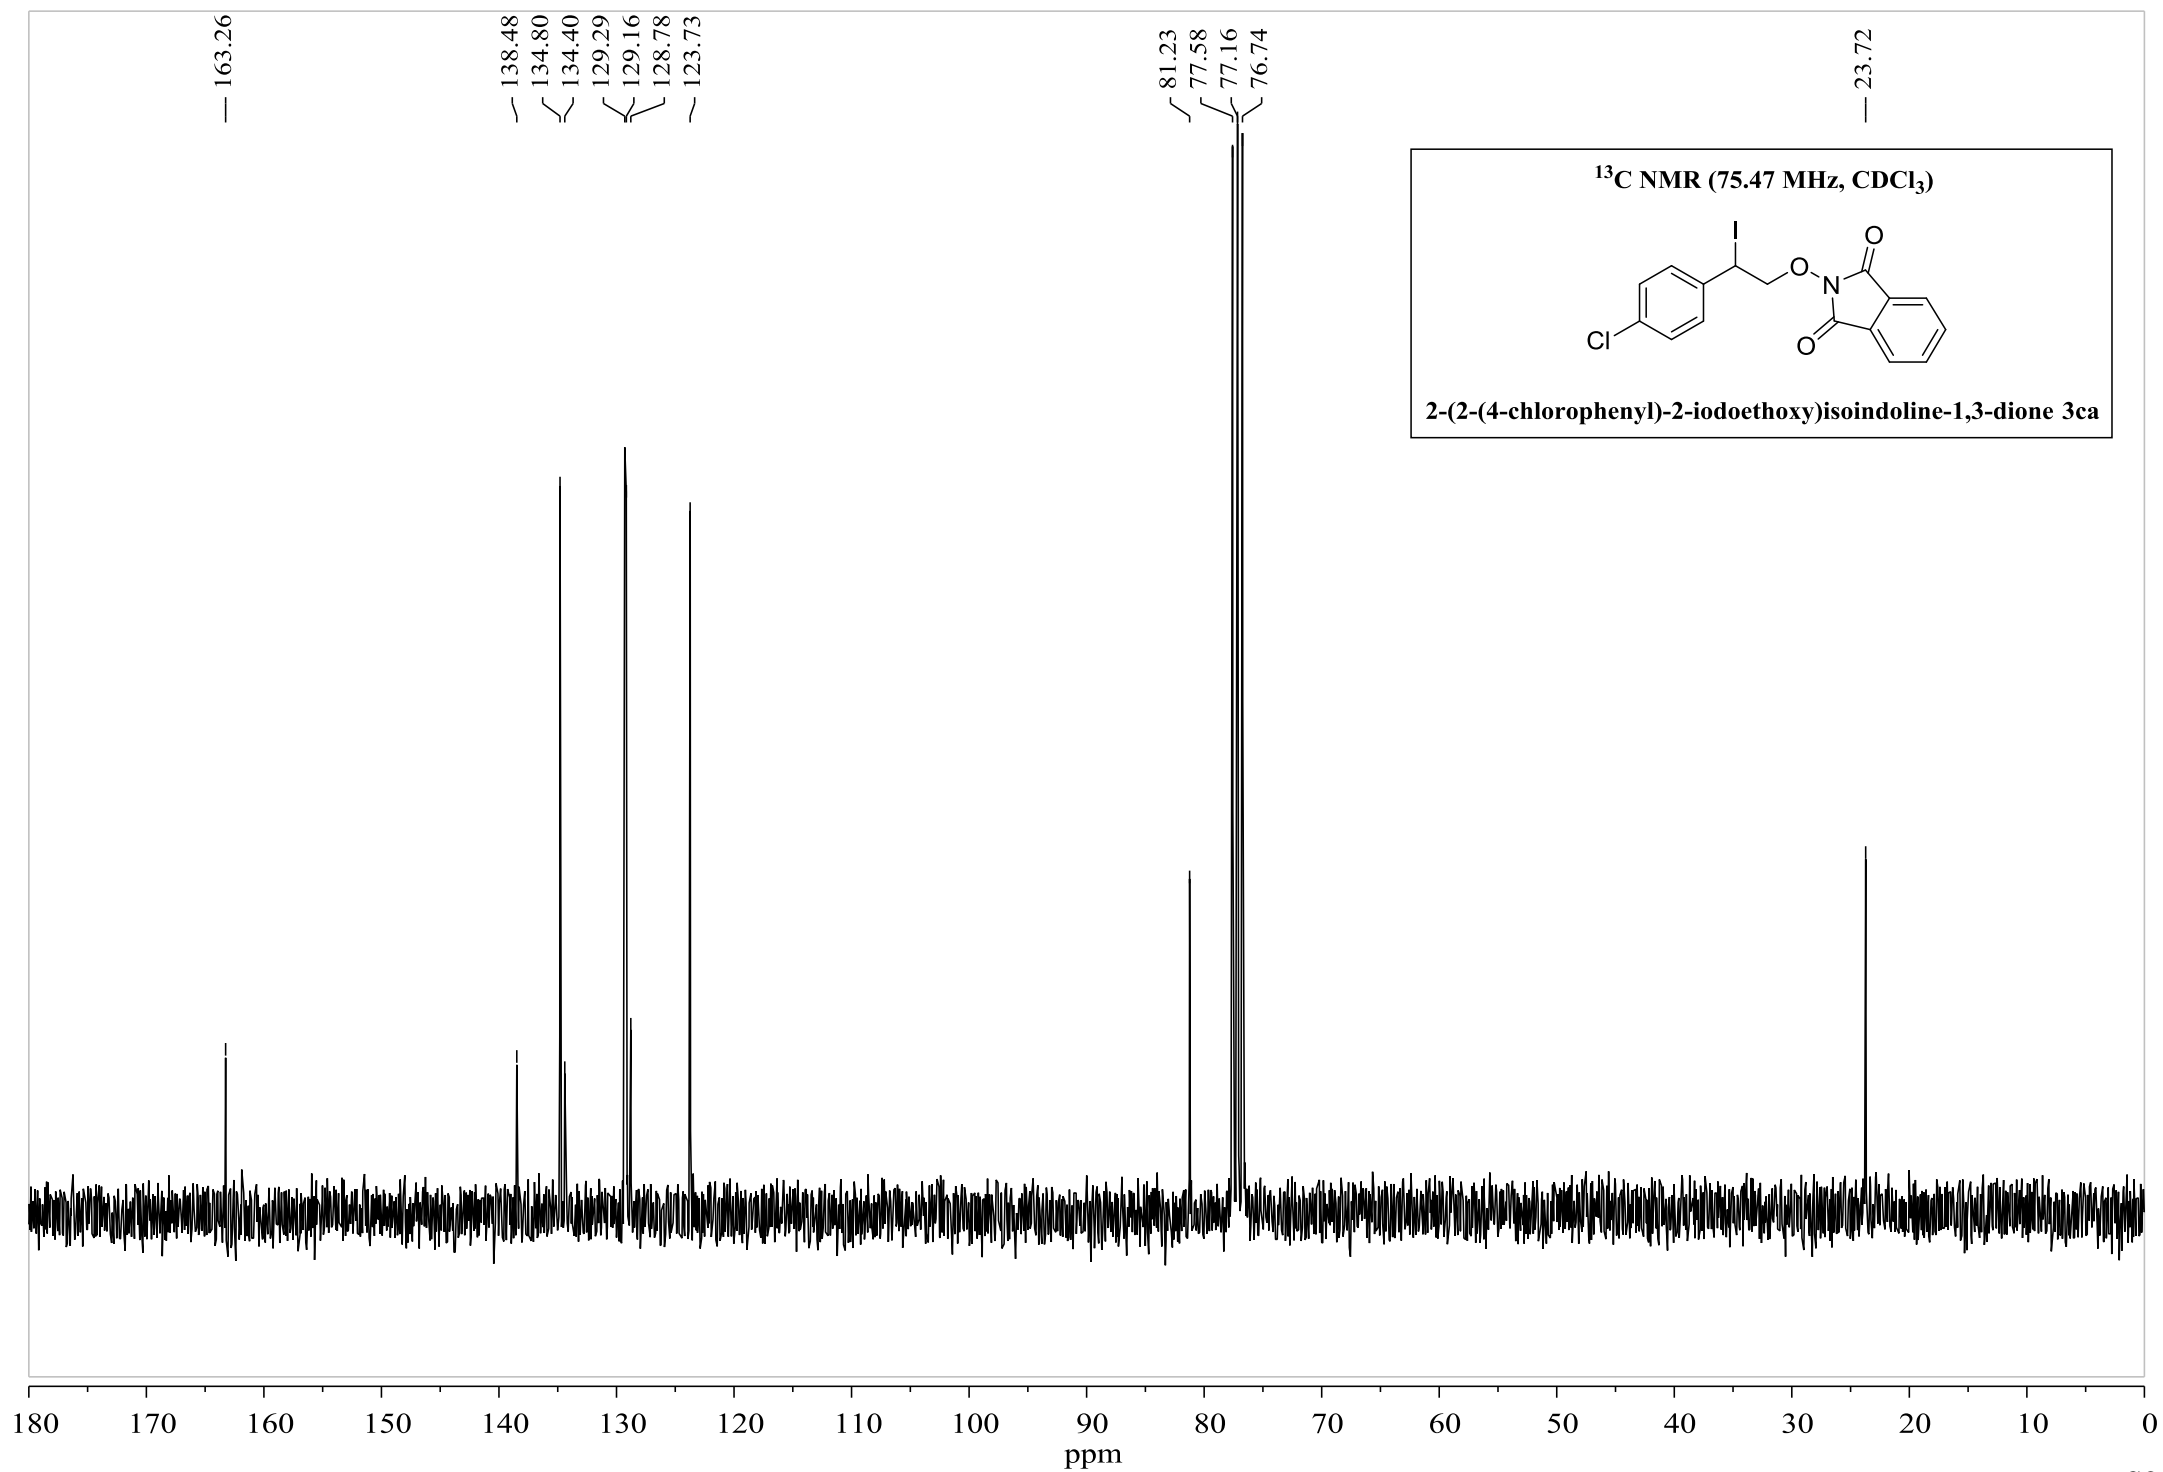

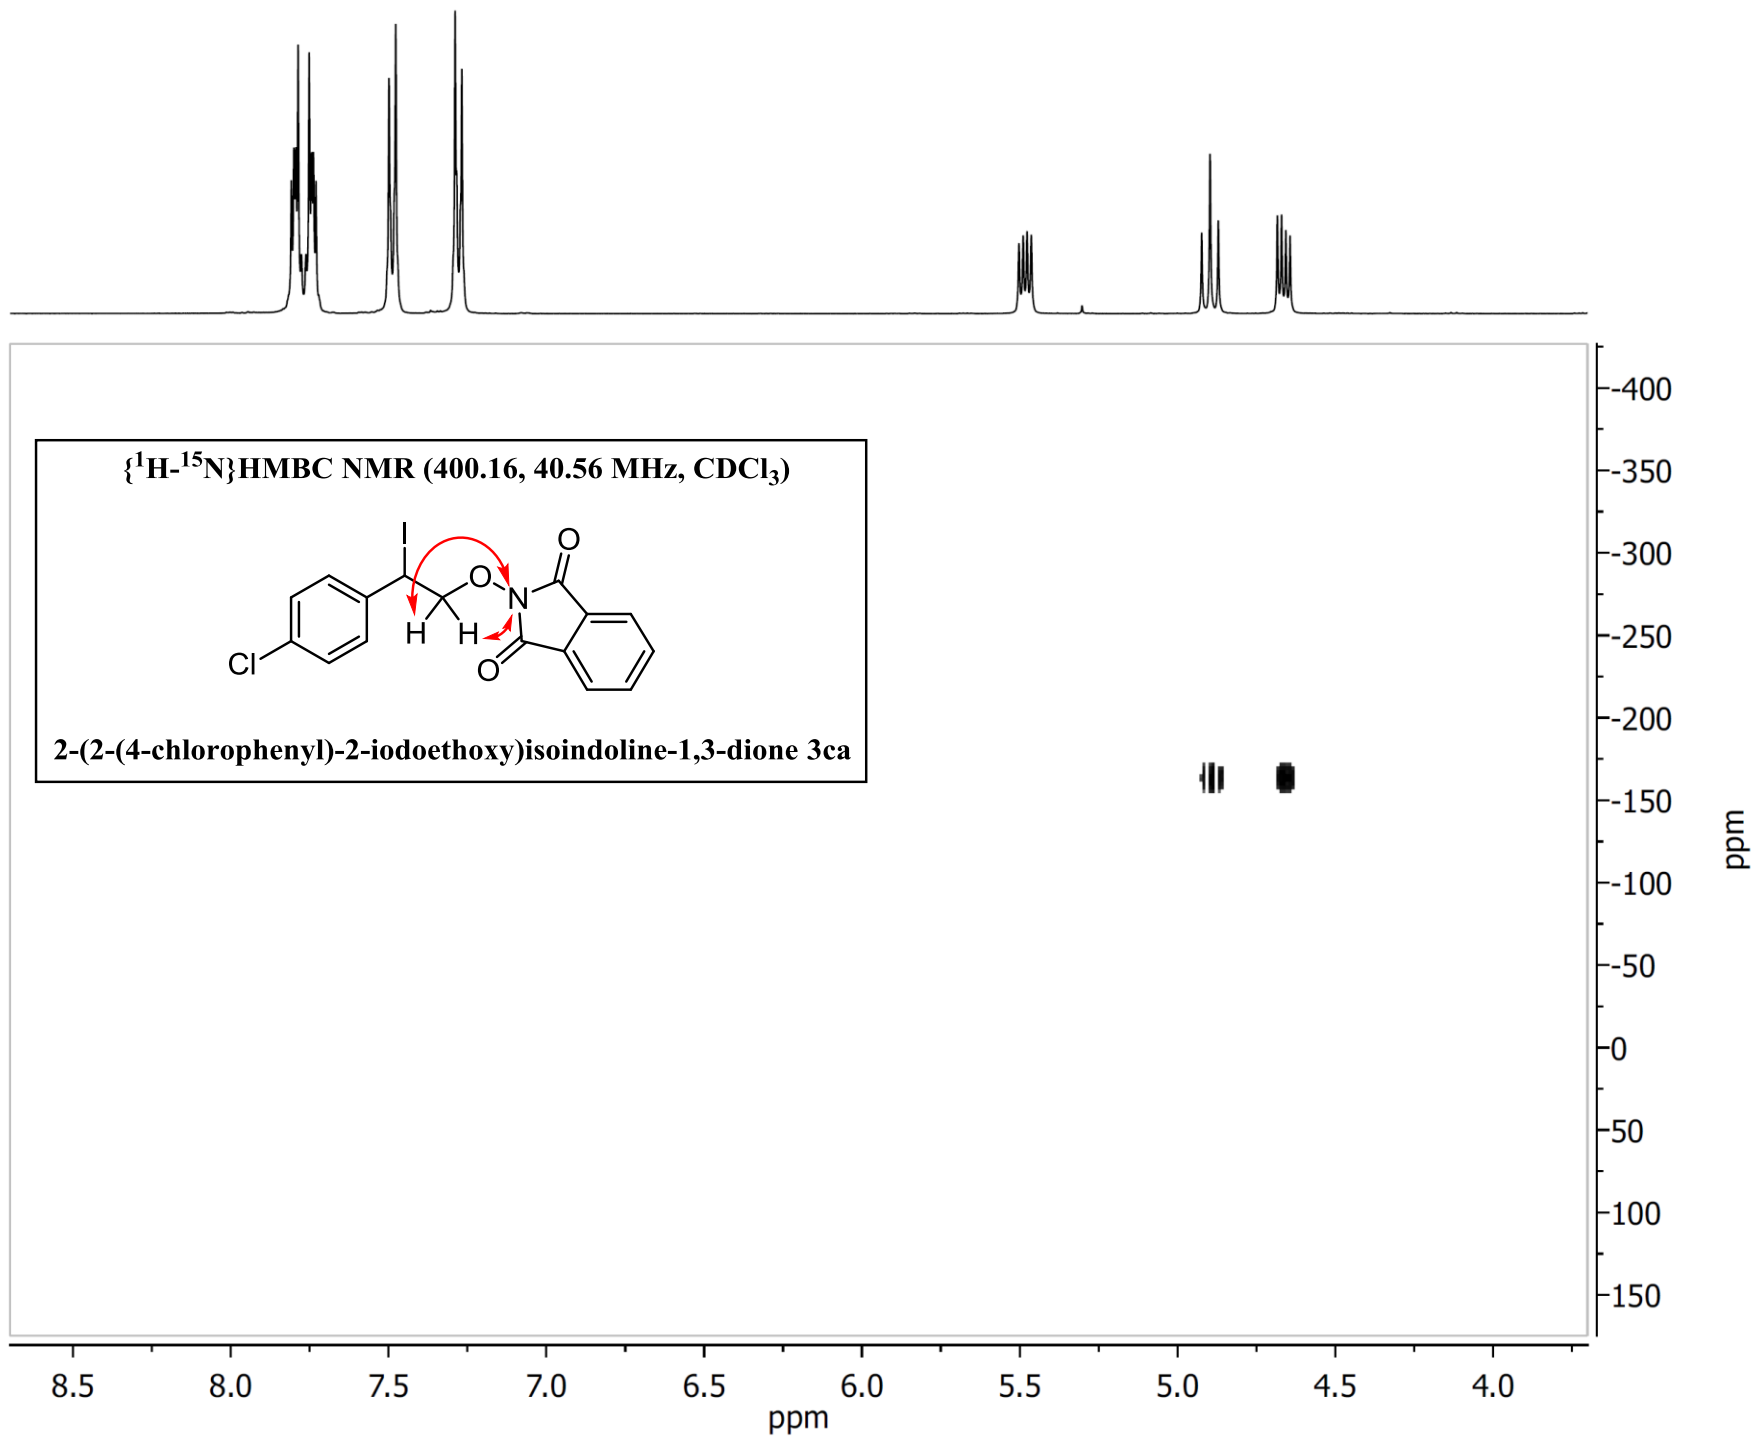

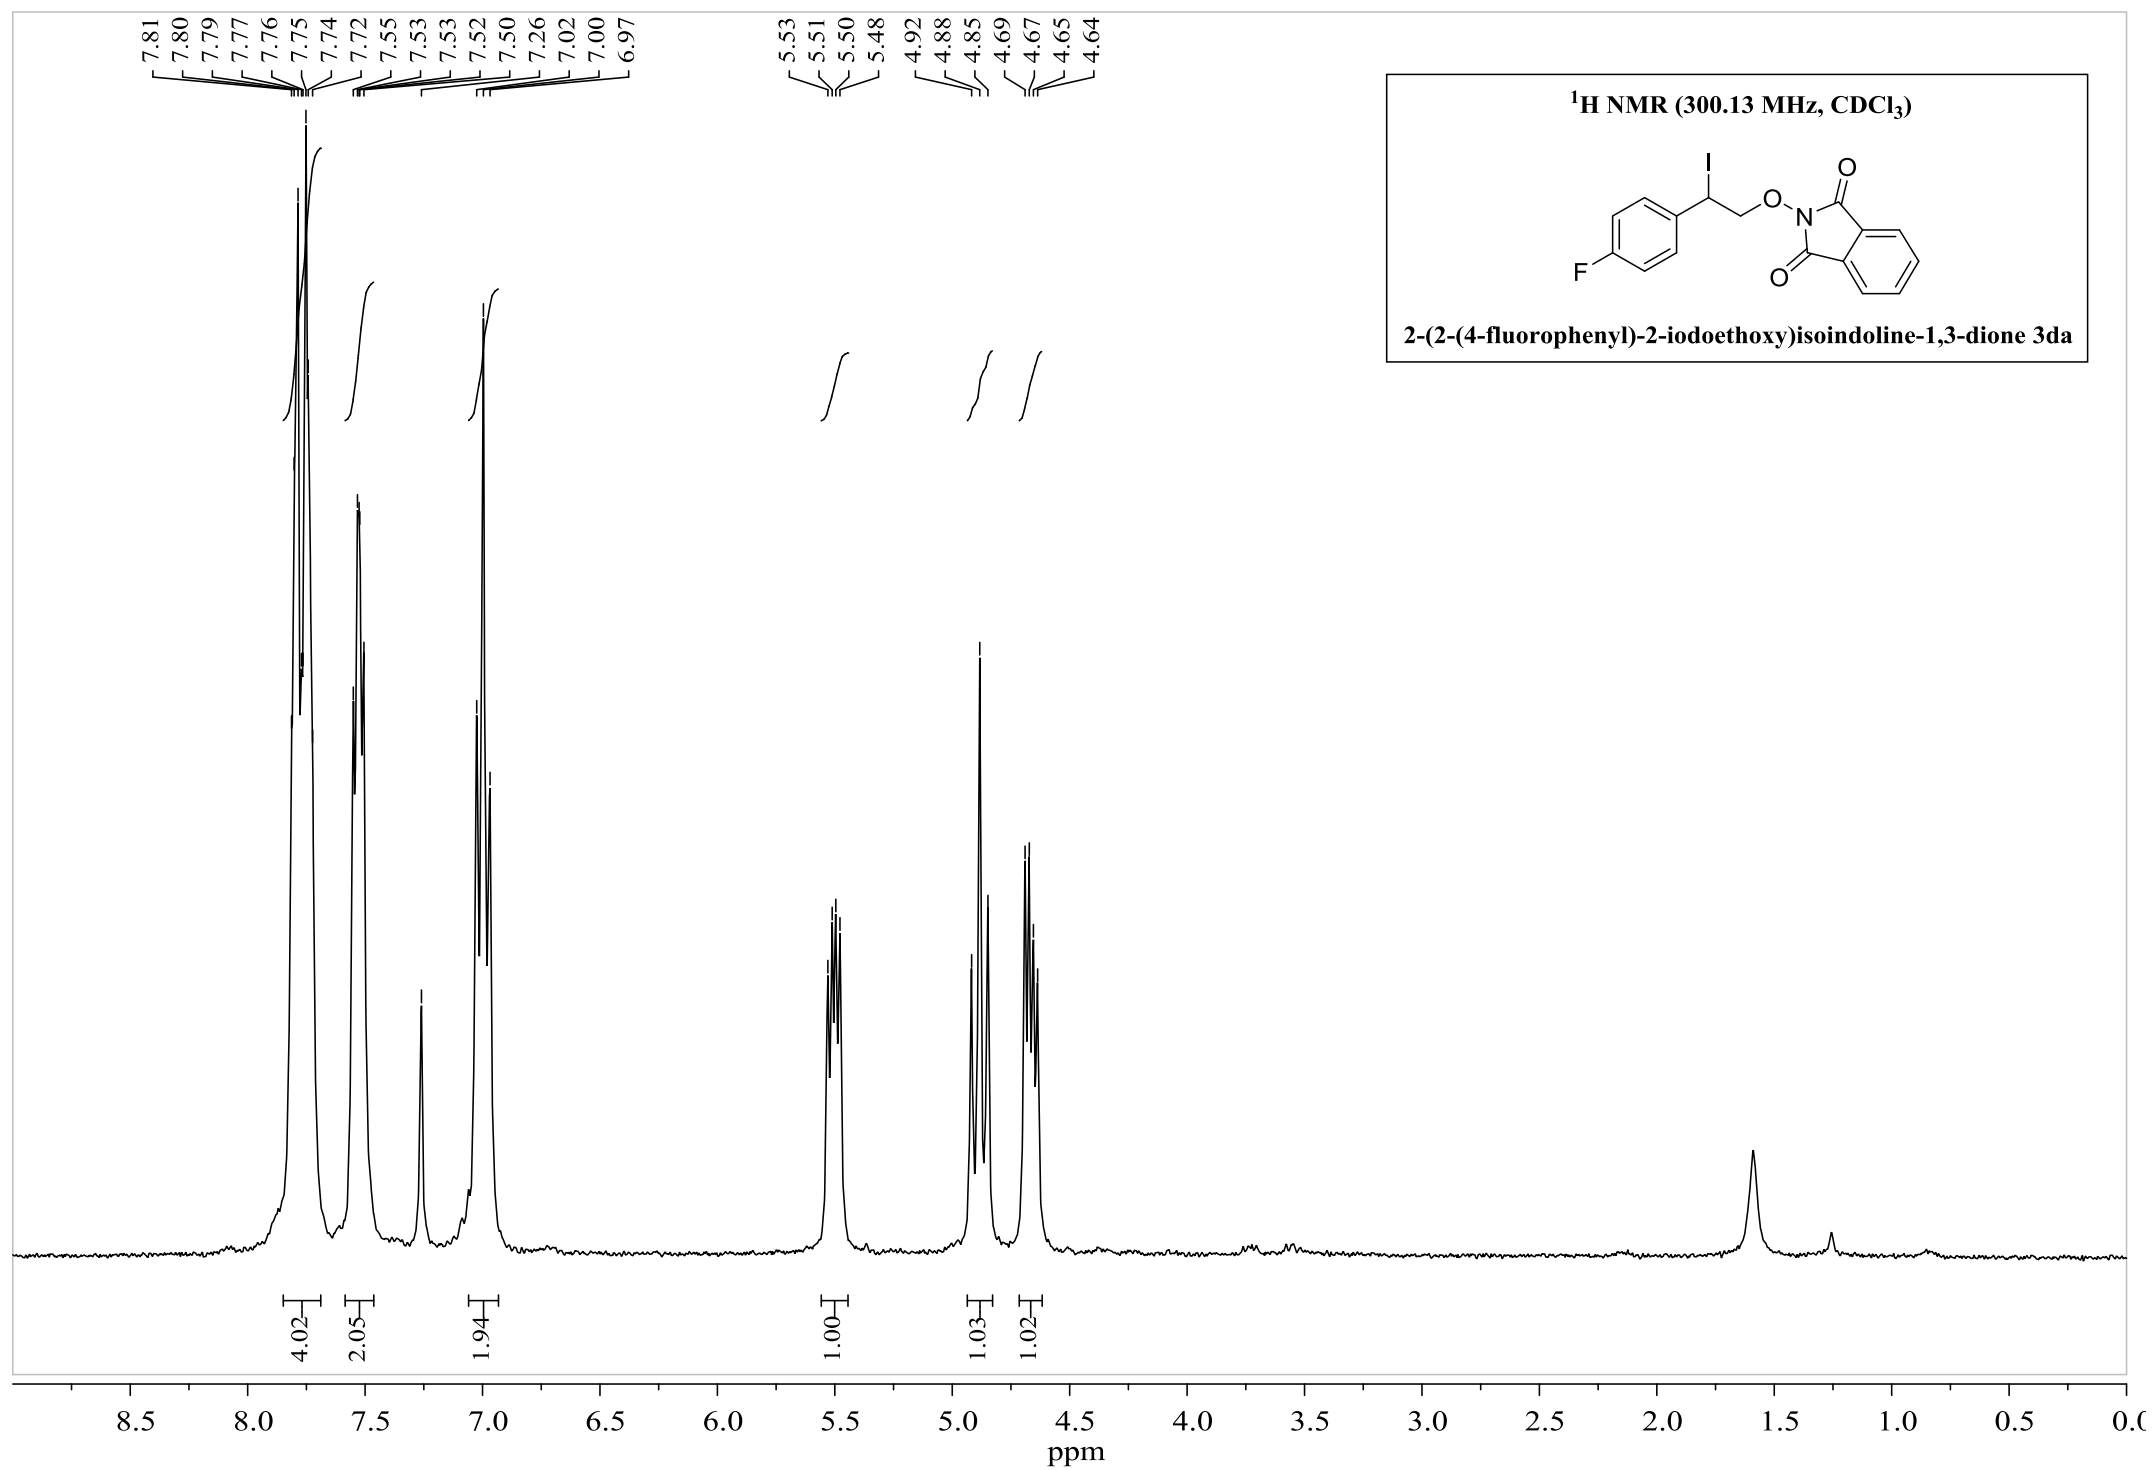

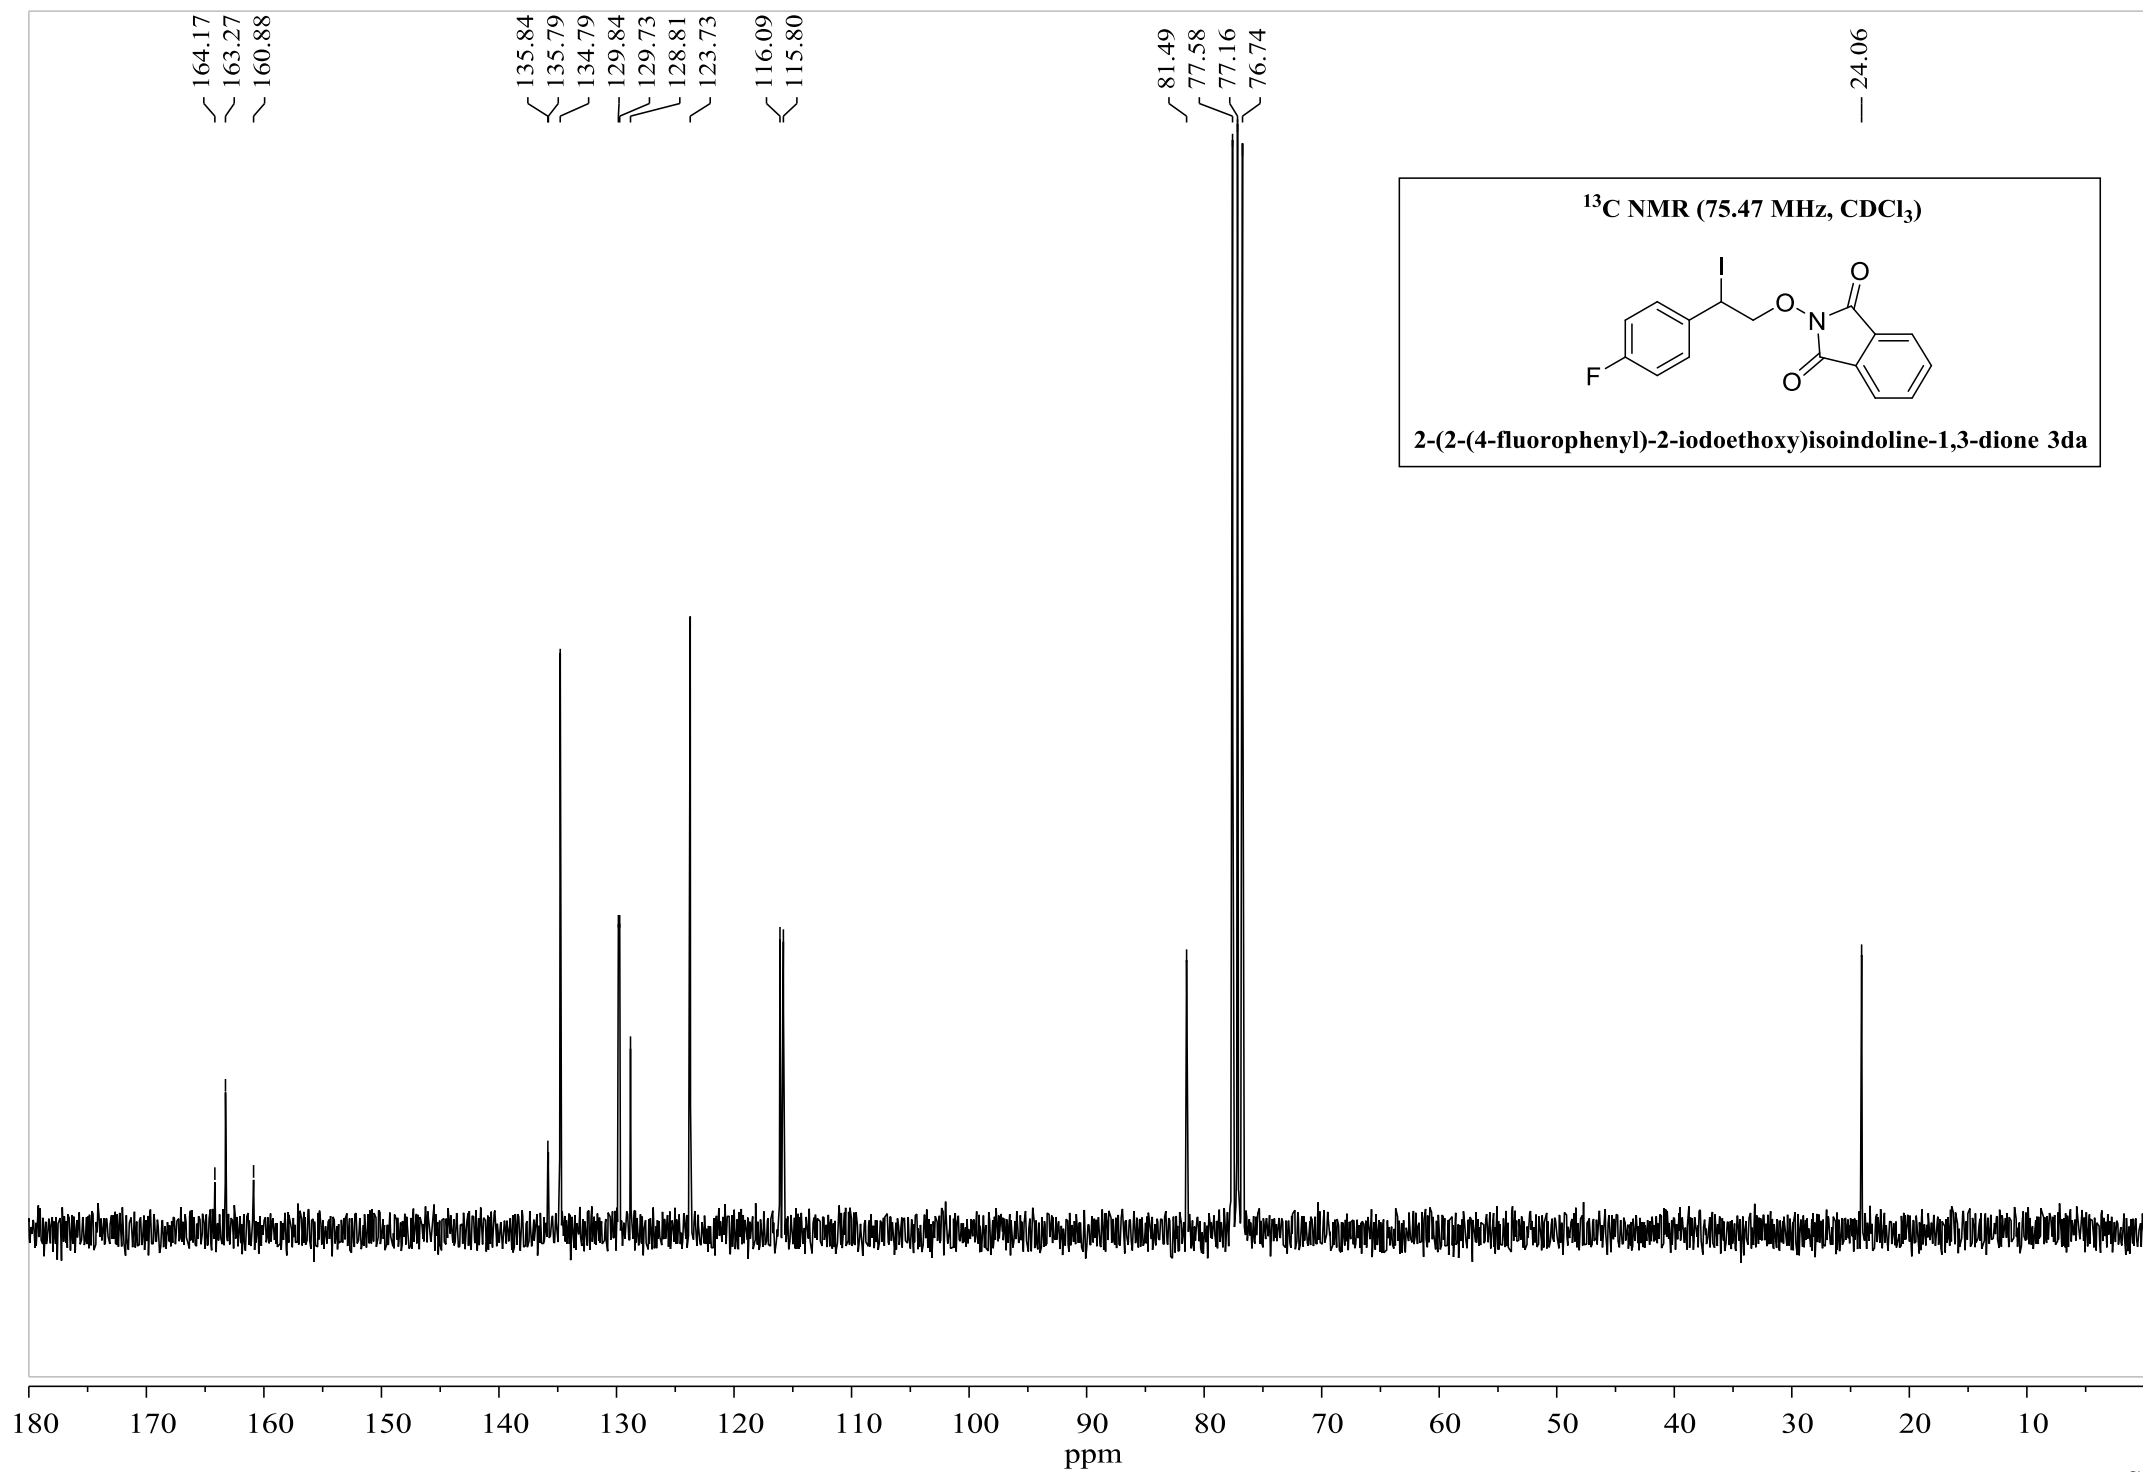

**$^{19}\text{F}$  NMR (282.40 MHz,  $\text{CDCl}_3$ )**

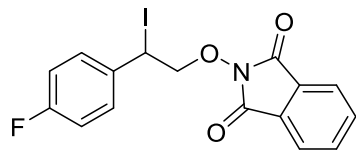

**2-(2-(4-fluorophenyl)-2-iodoethoxy)isoindoline-1,3-dione 3da**

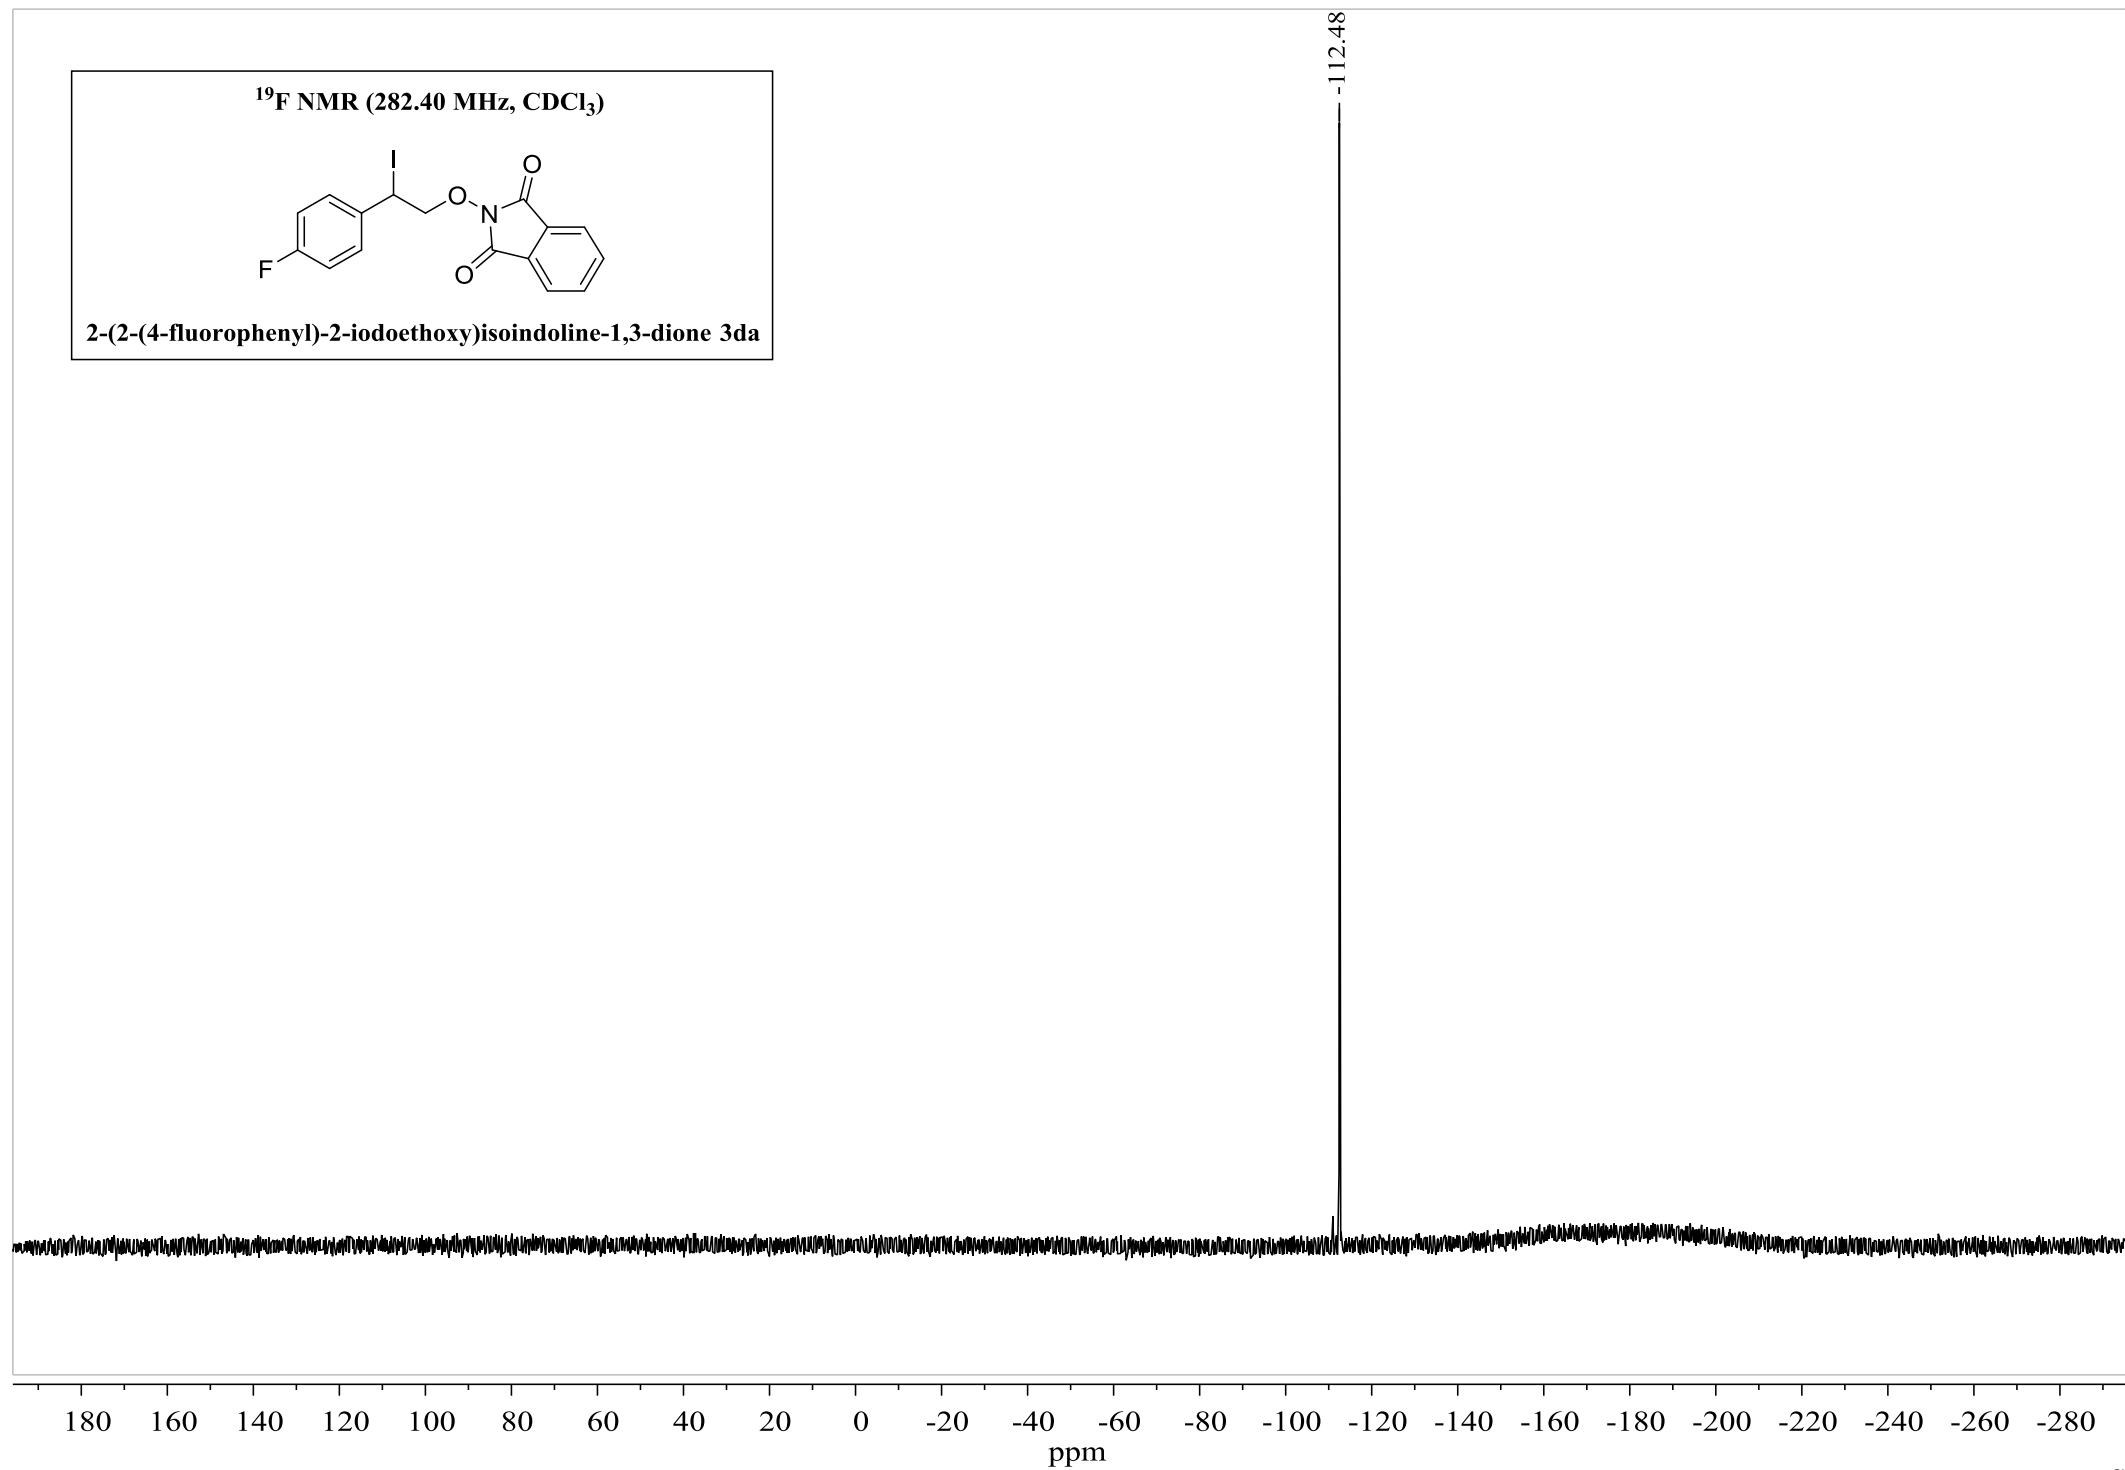

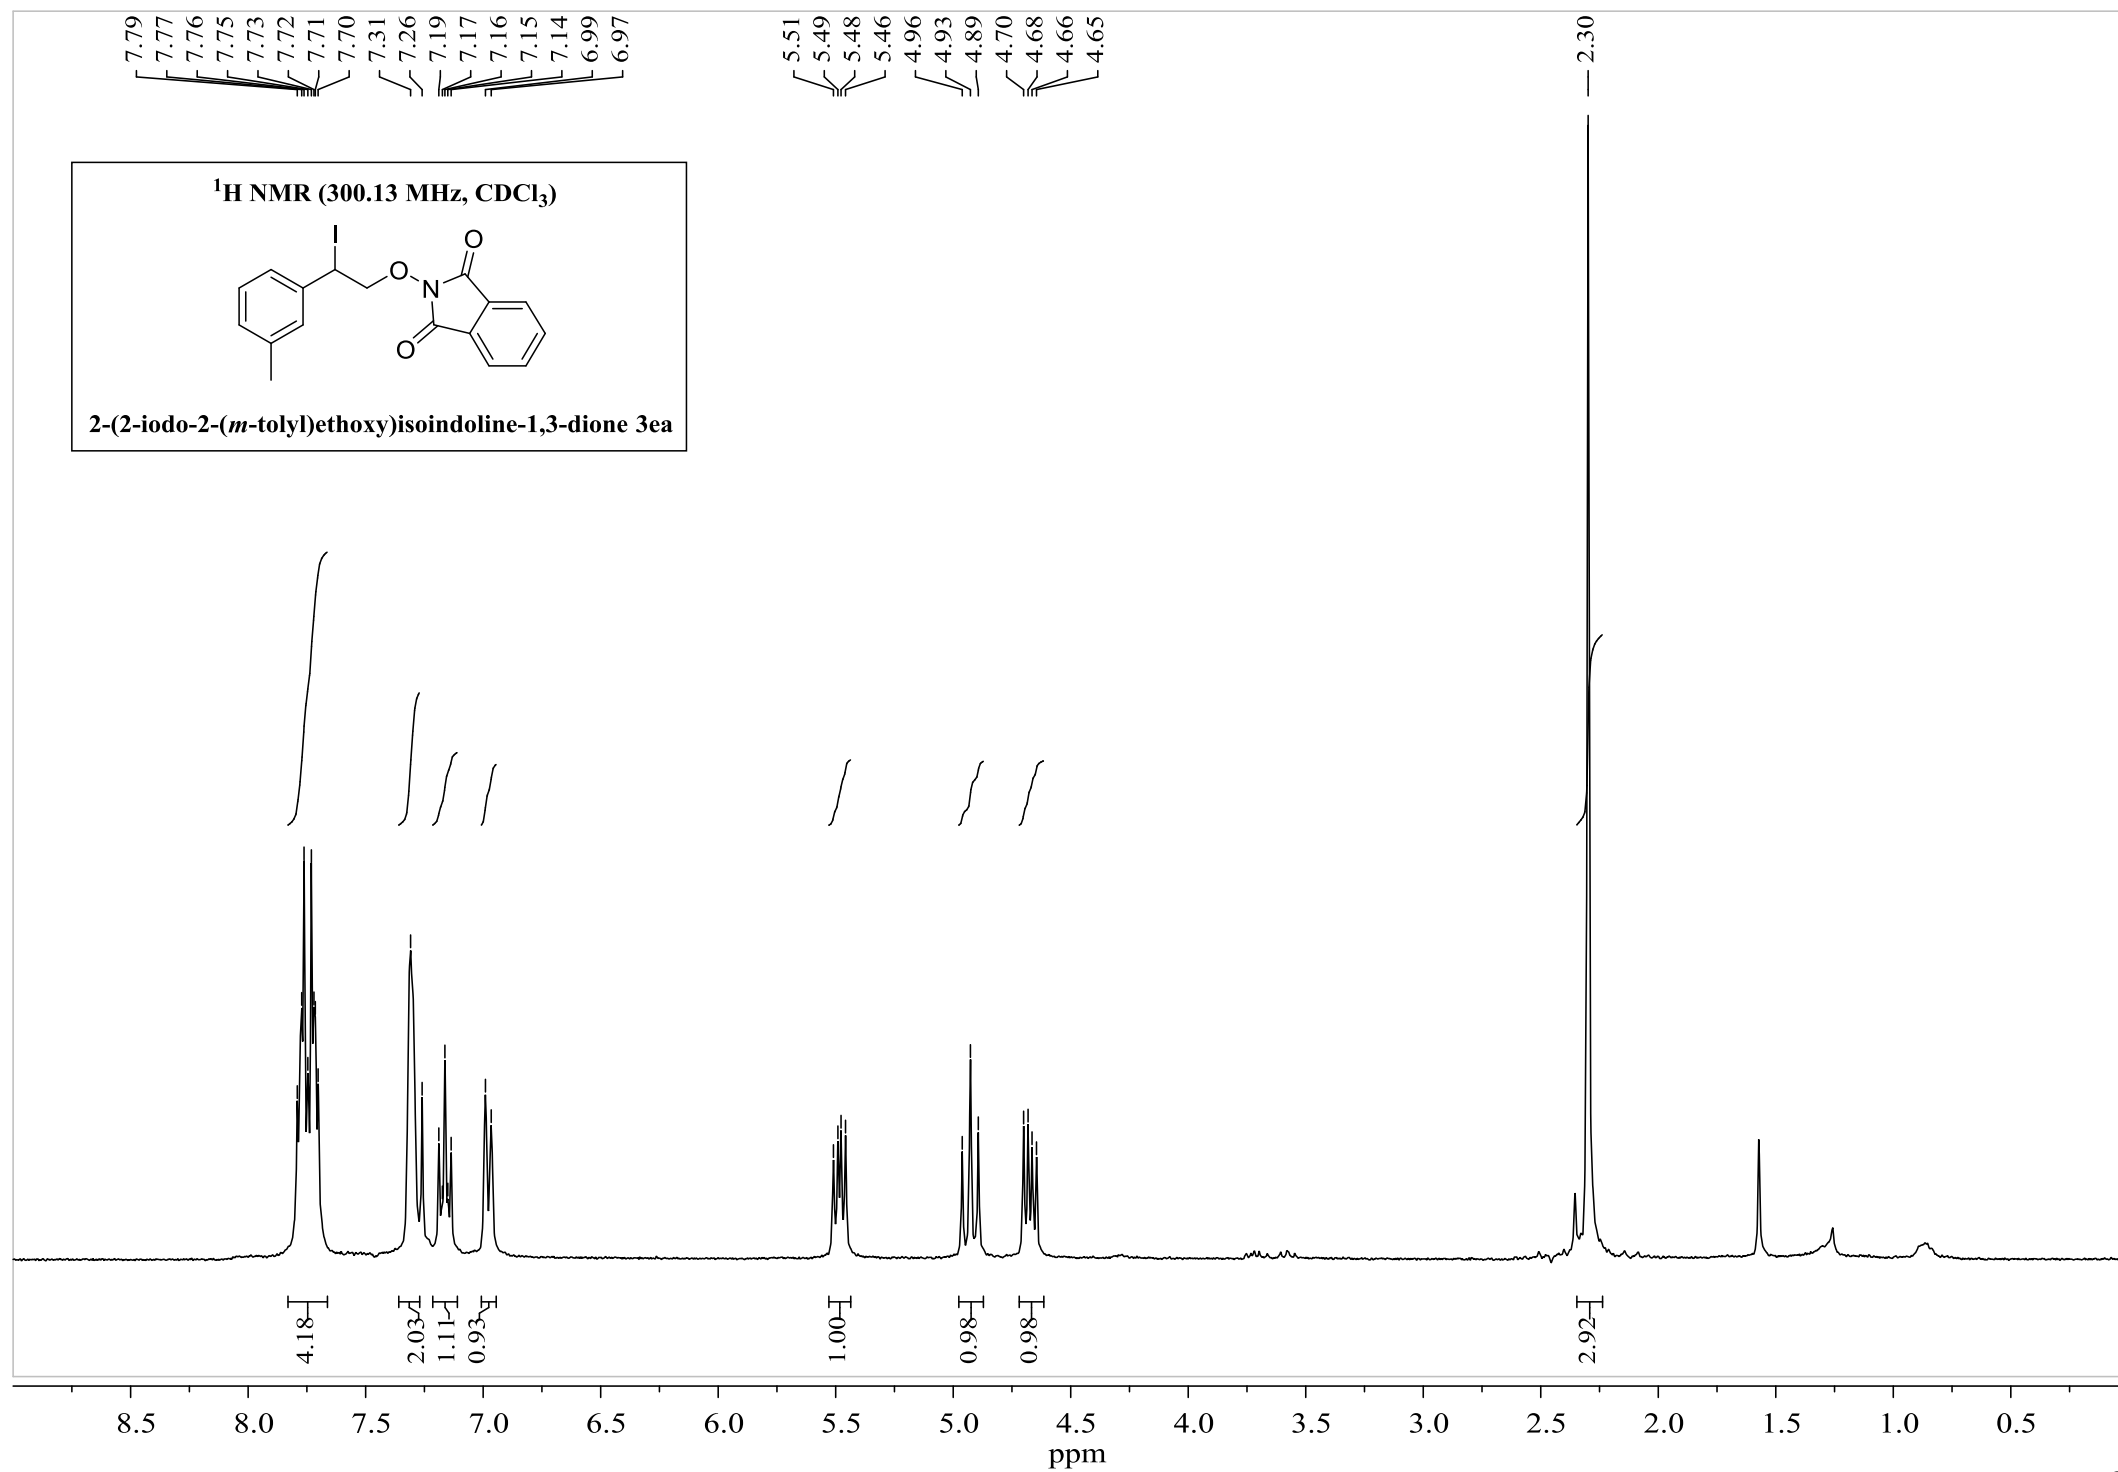

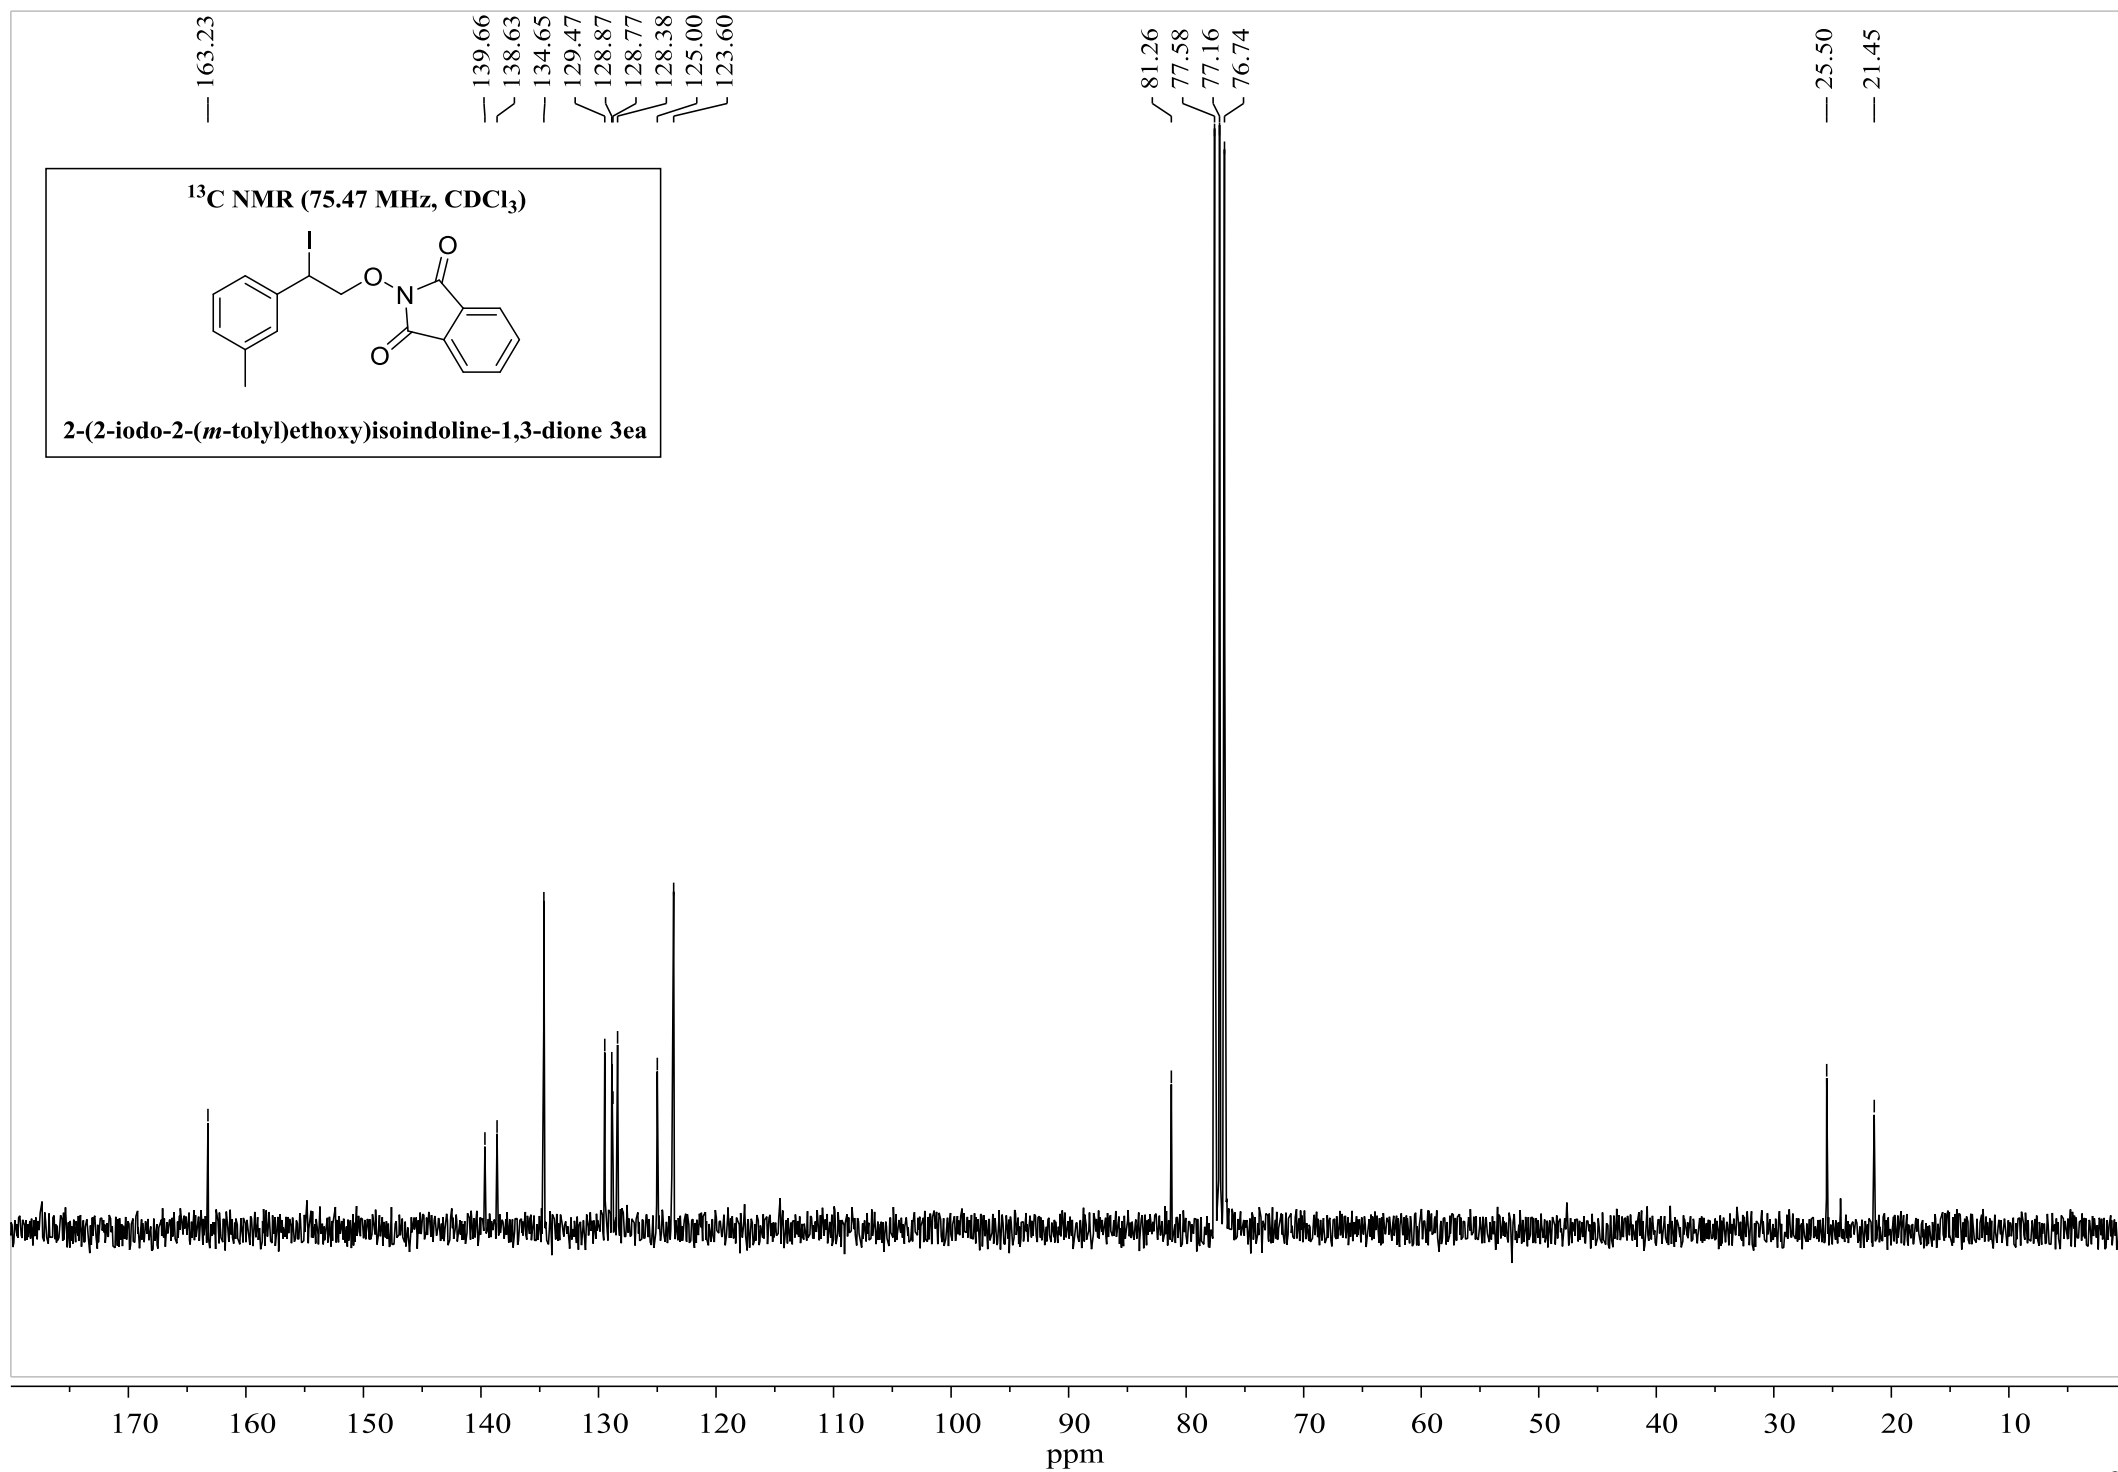



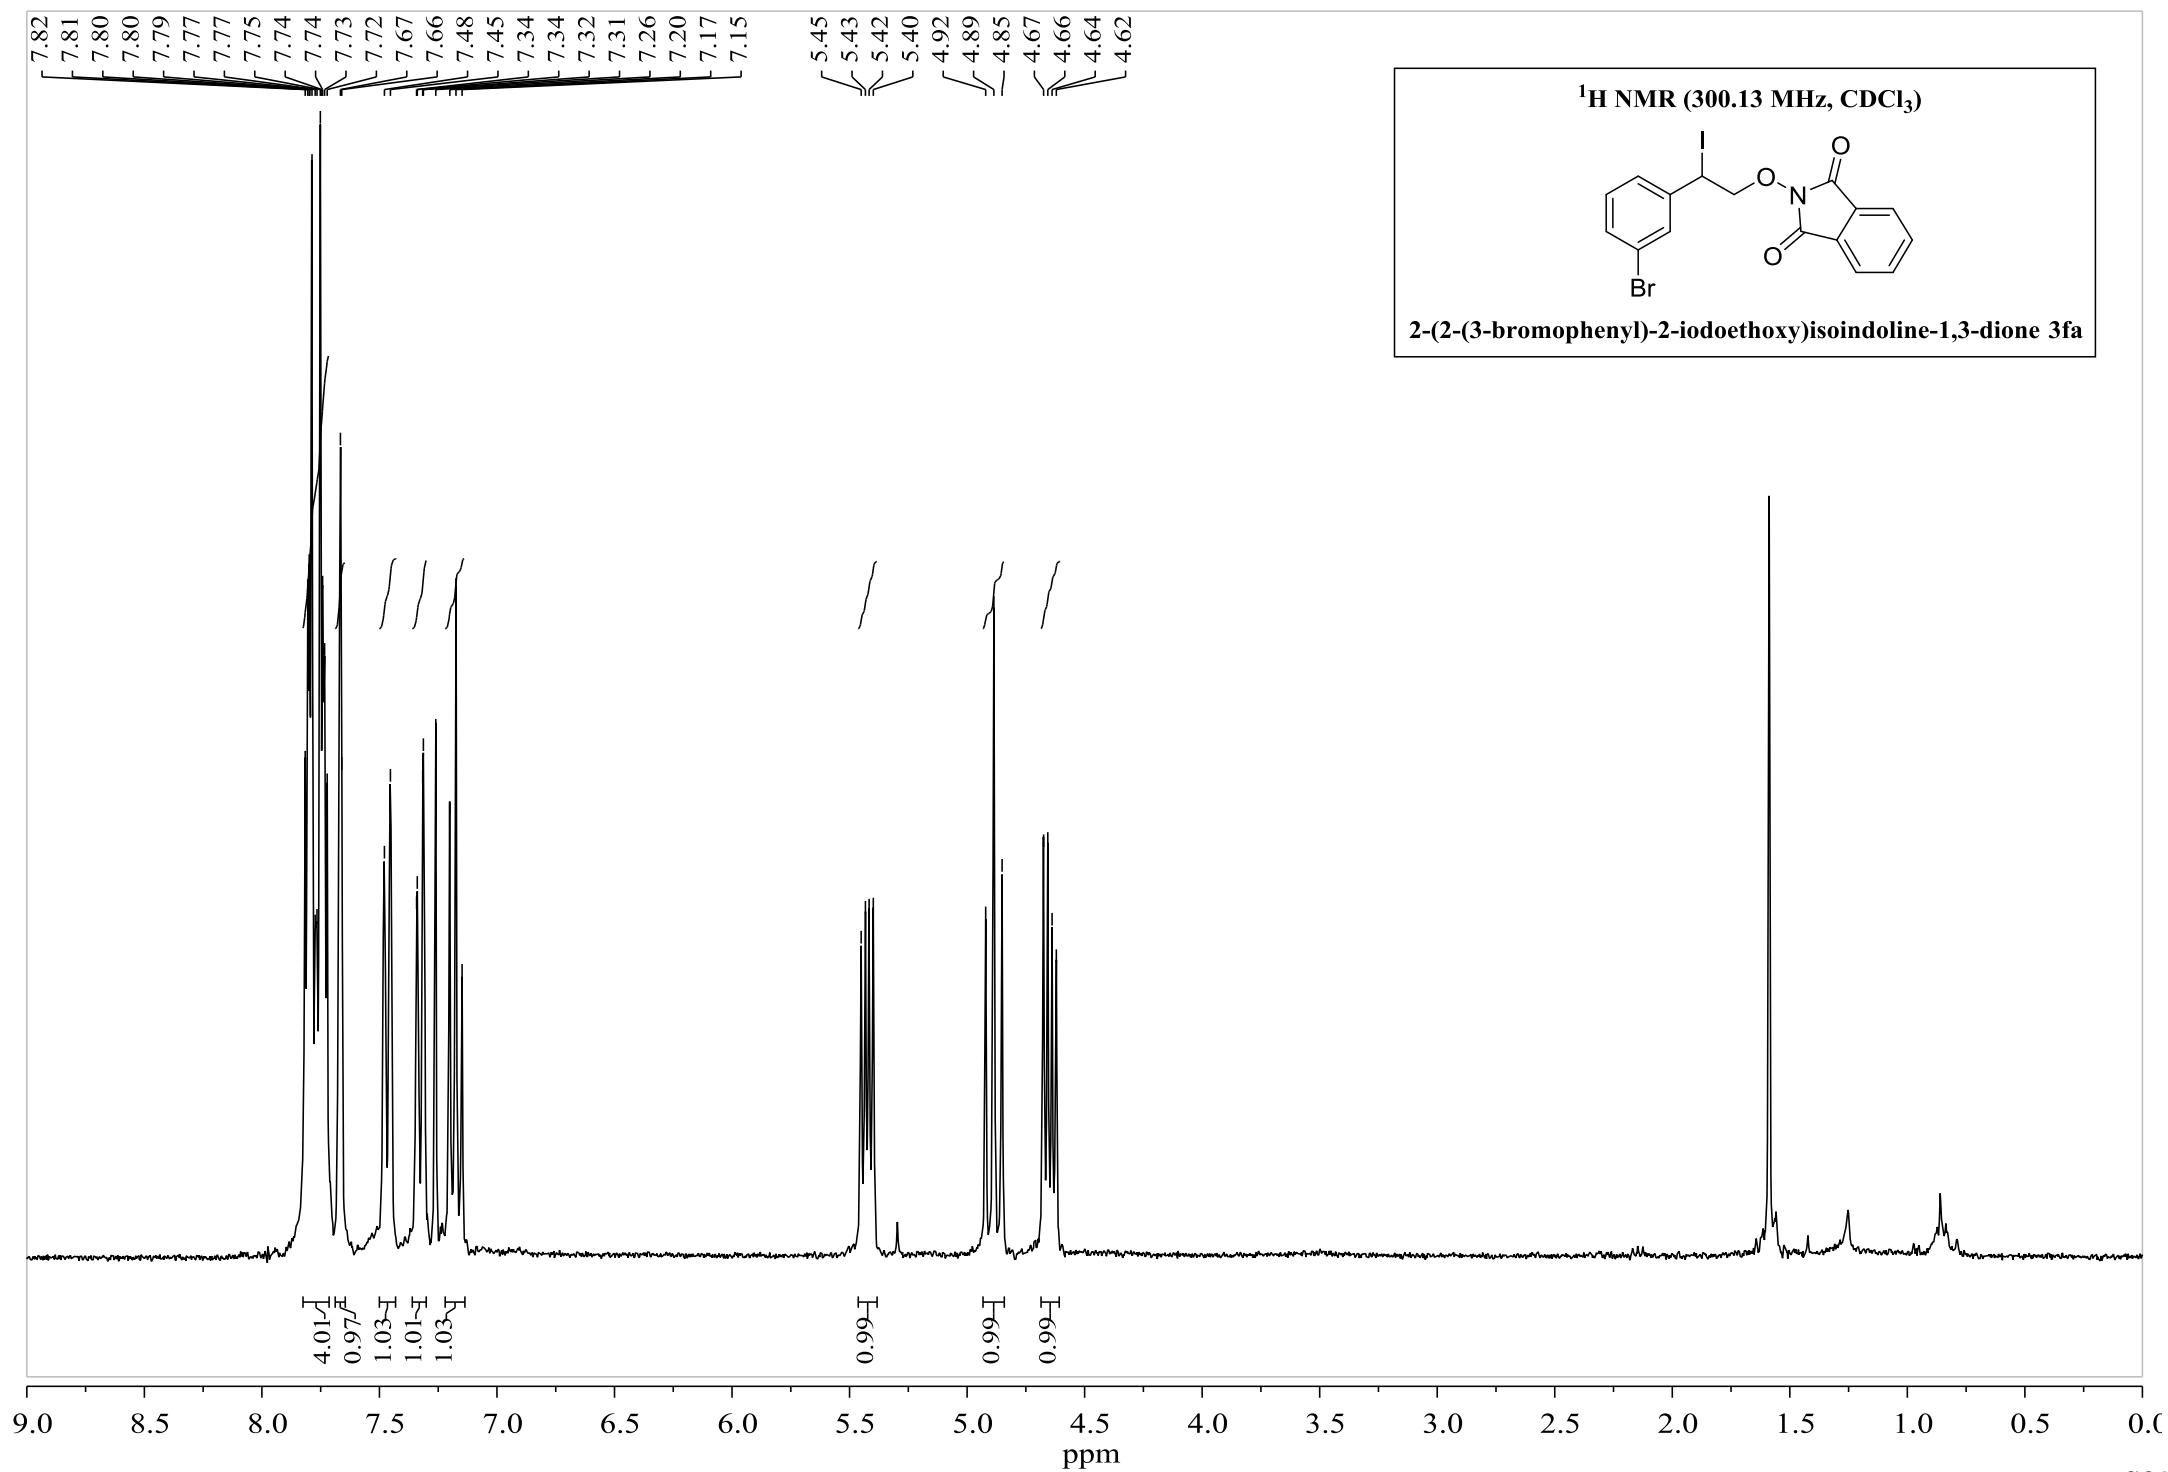

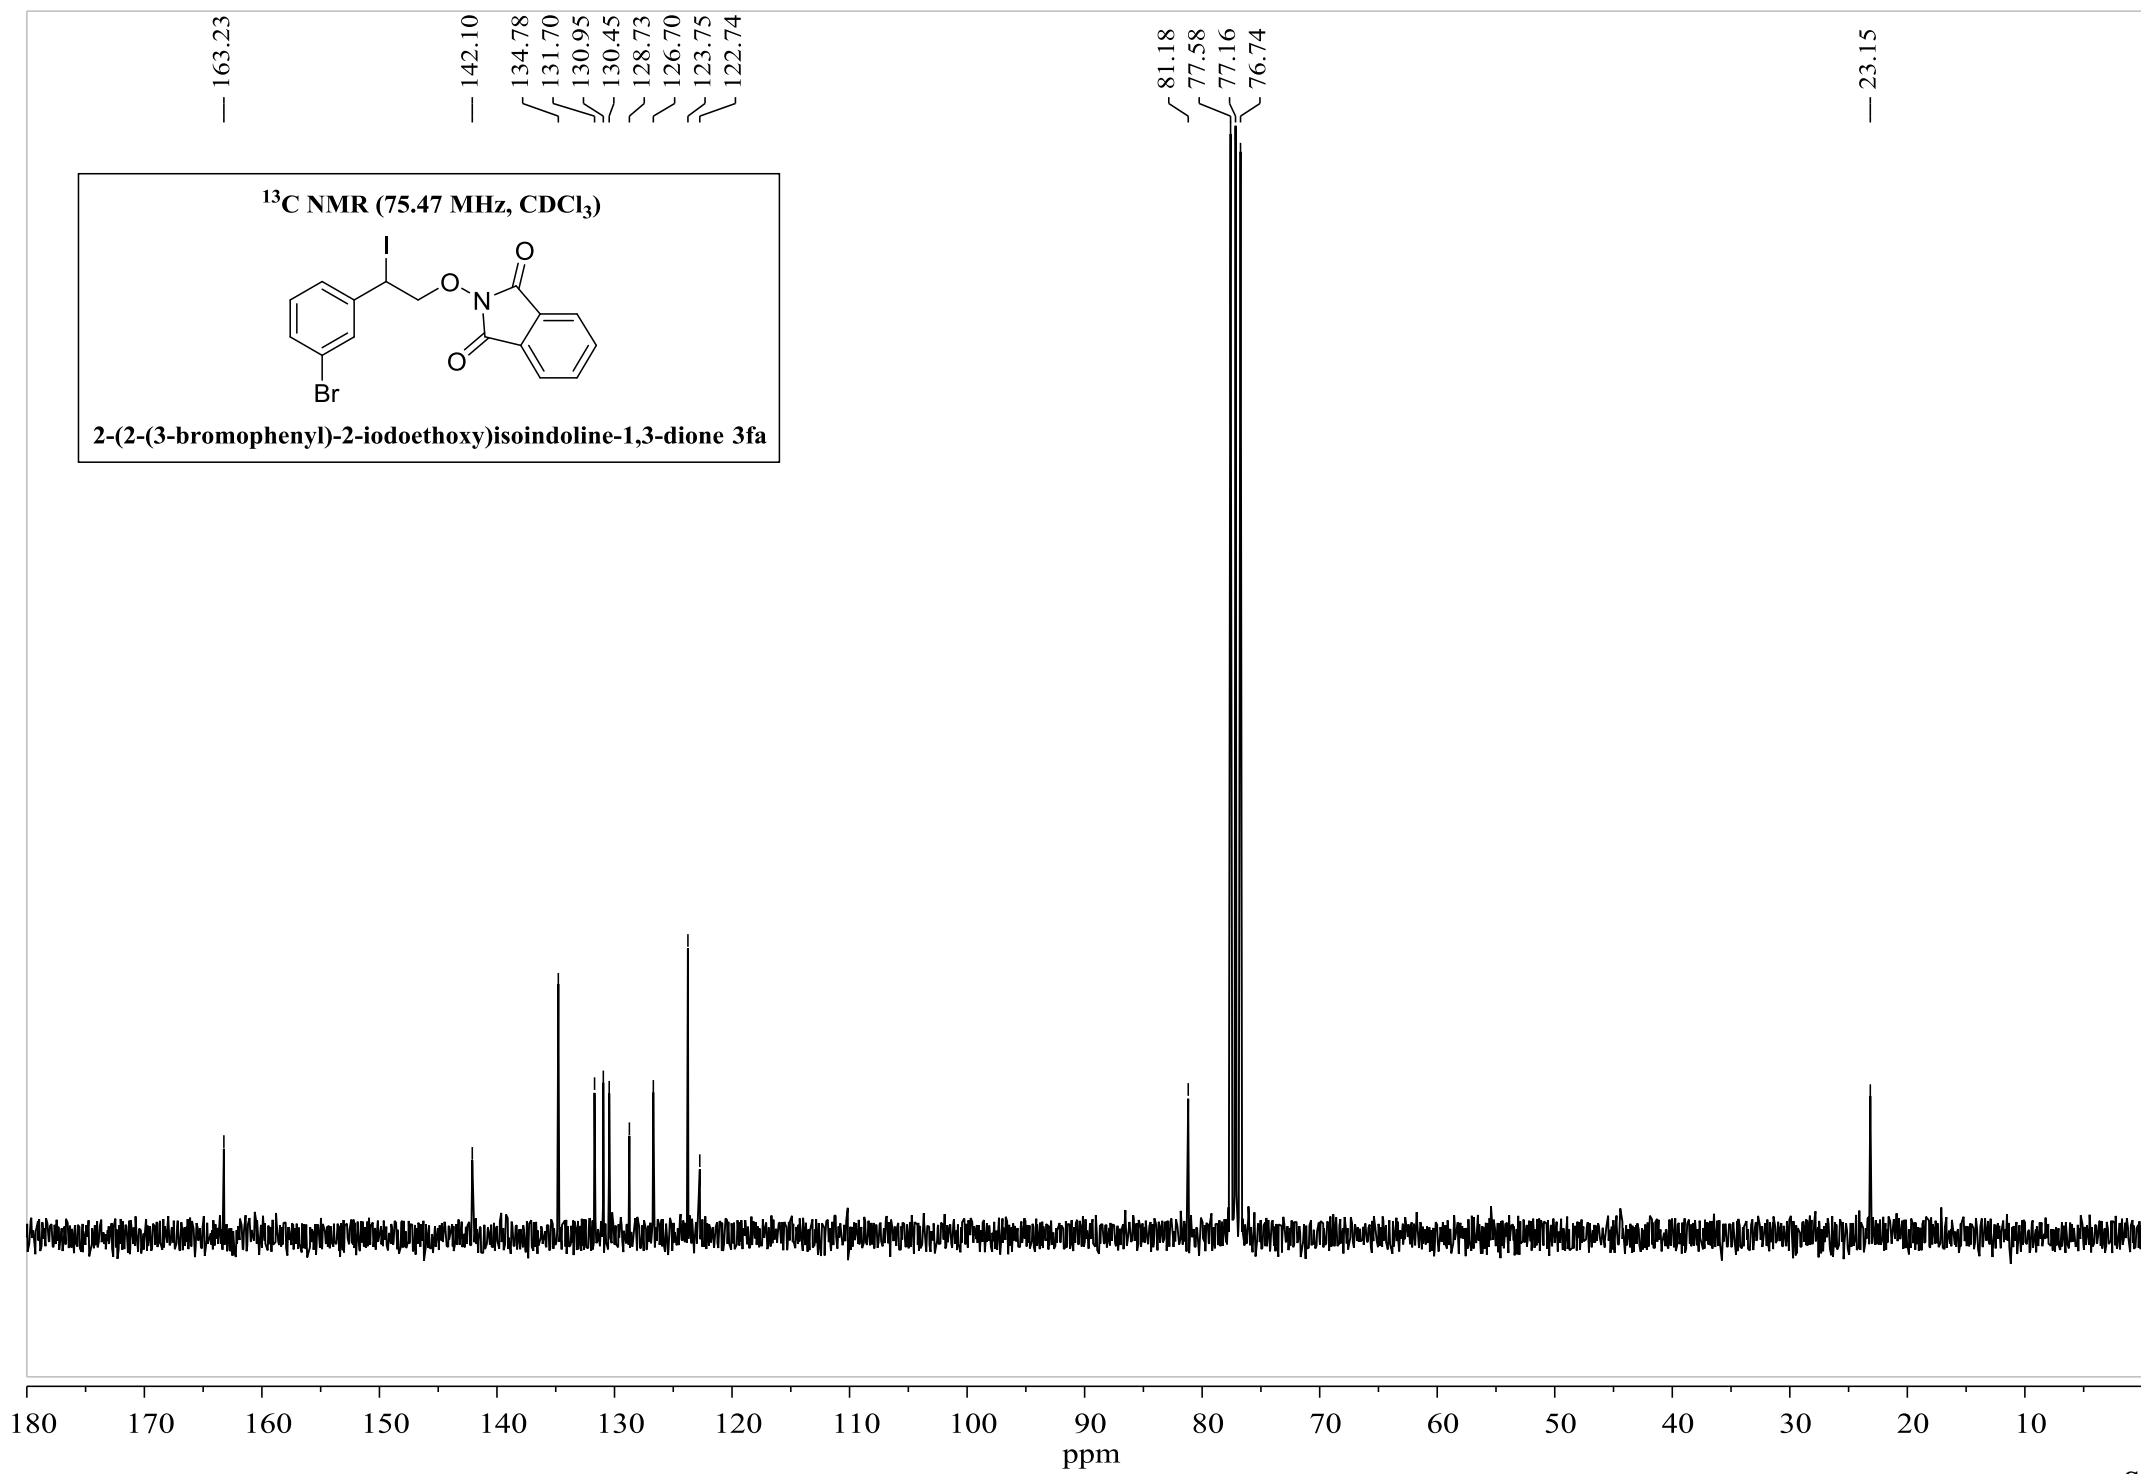

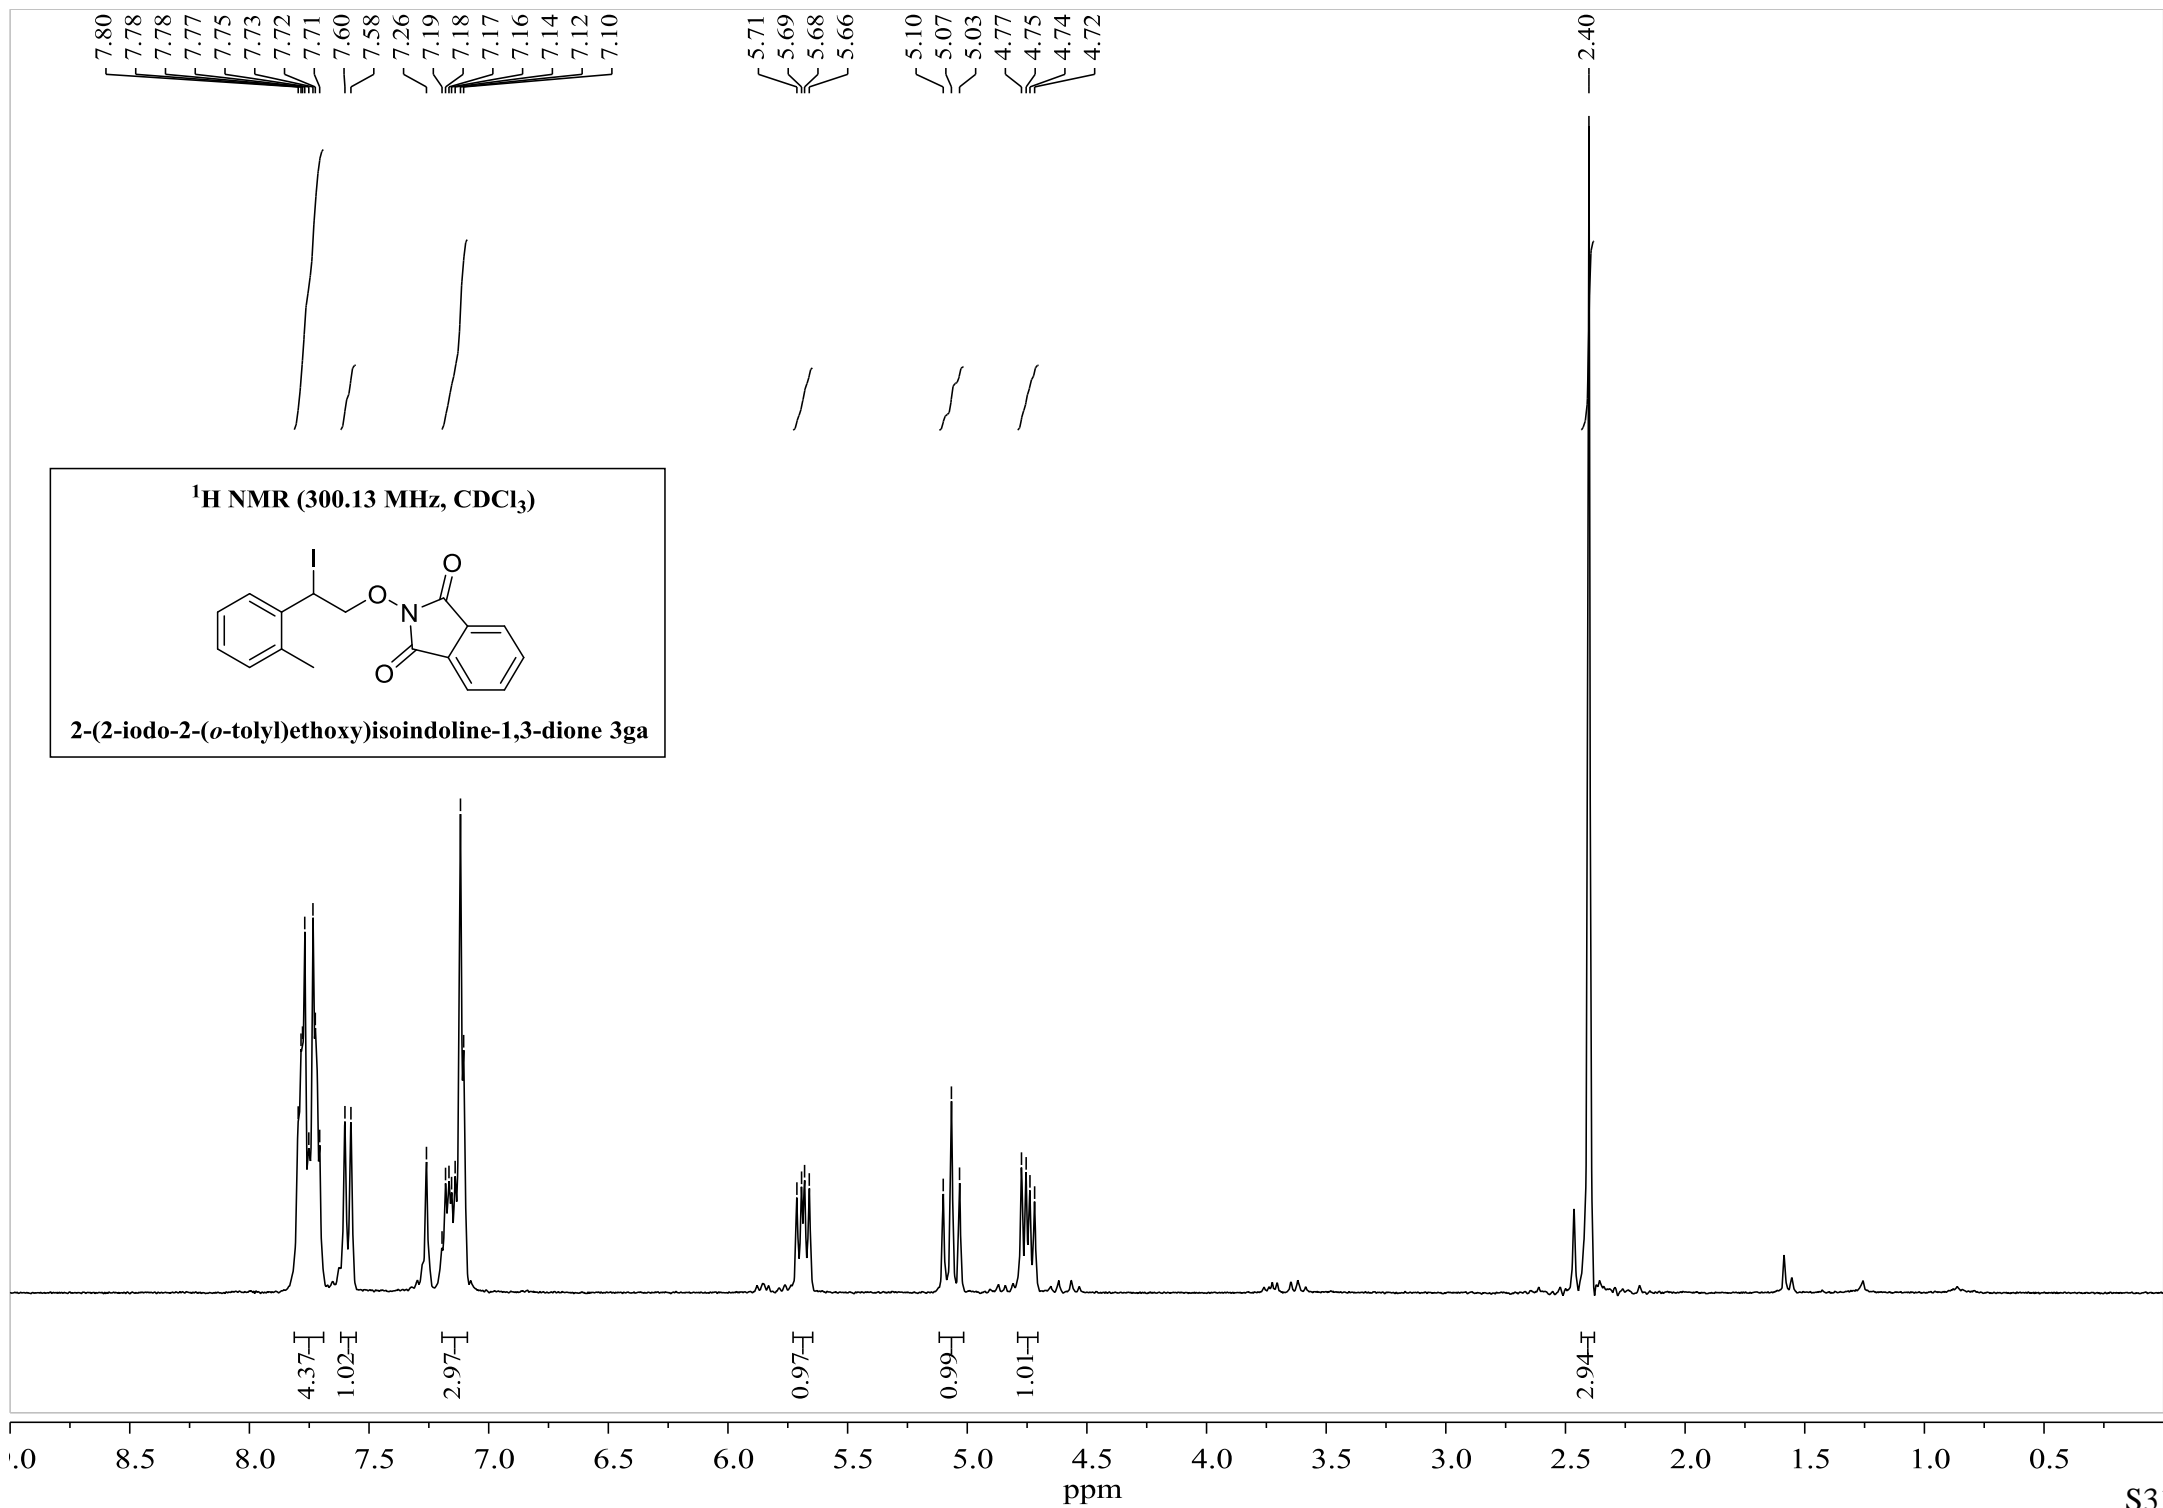

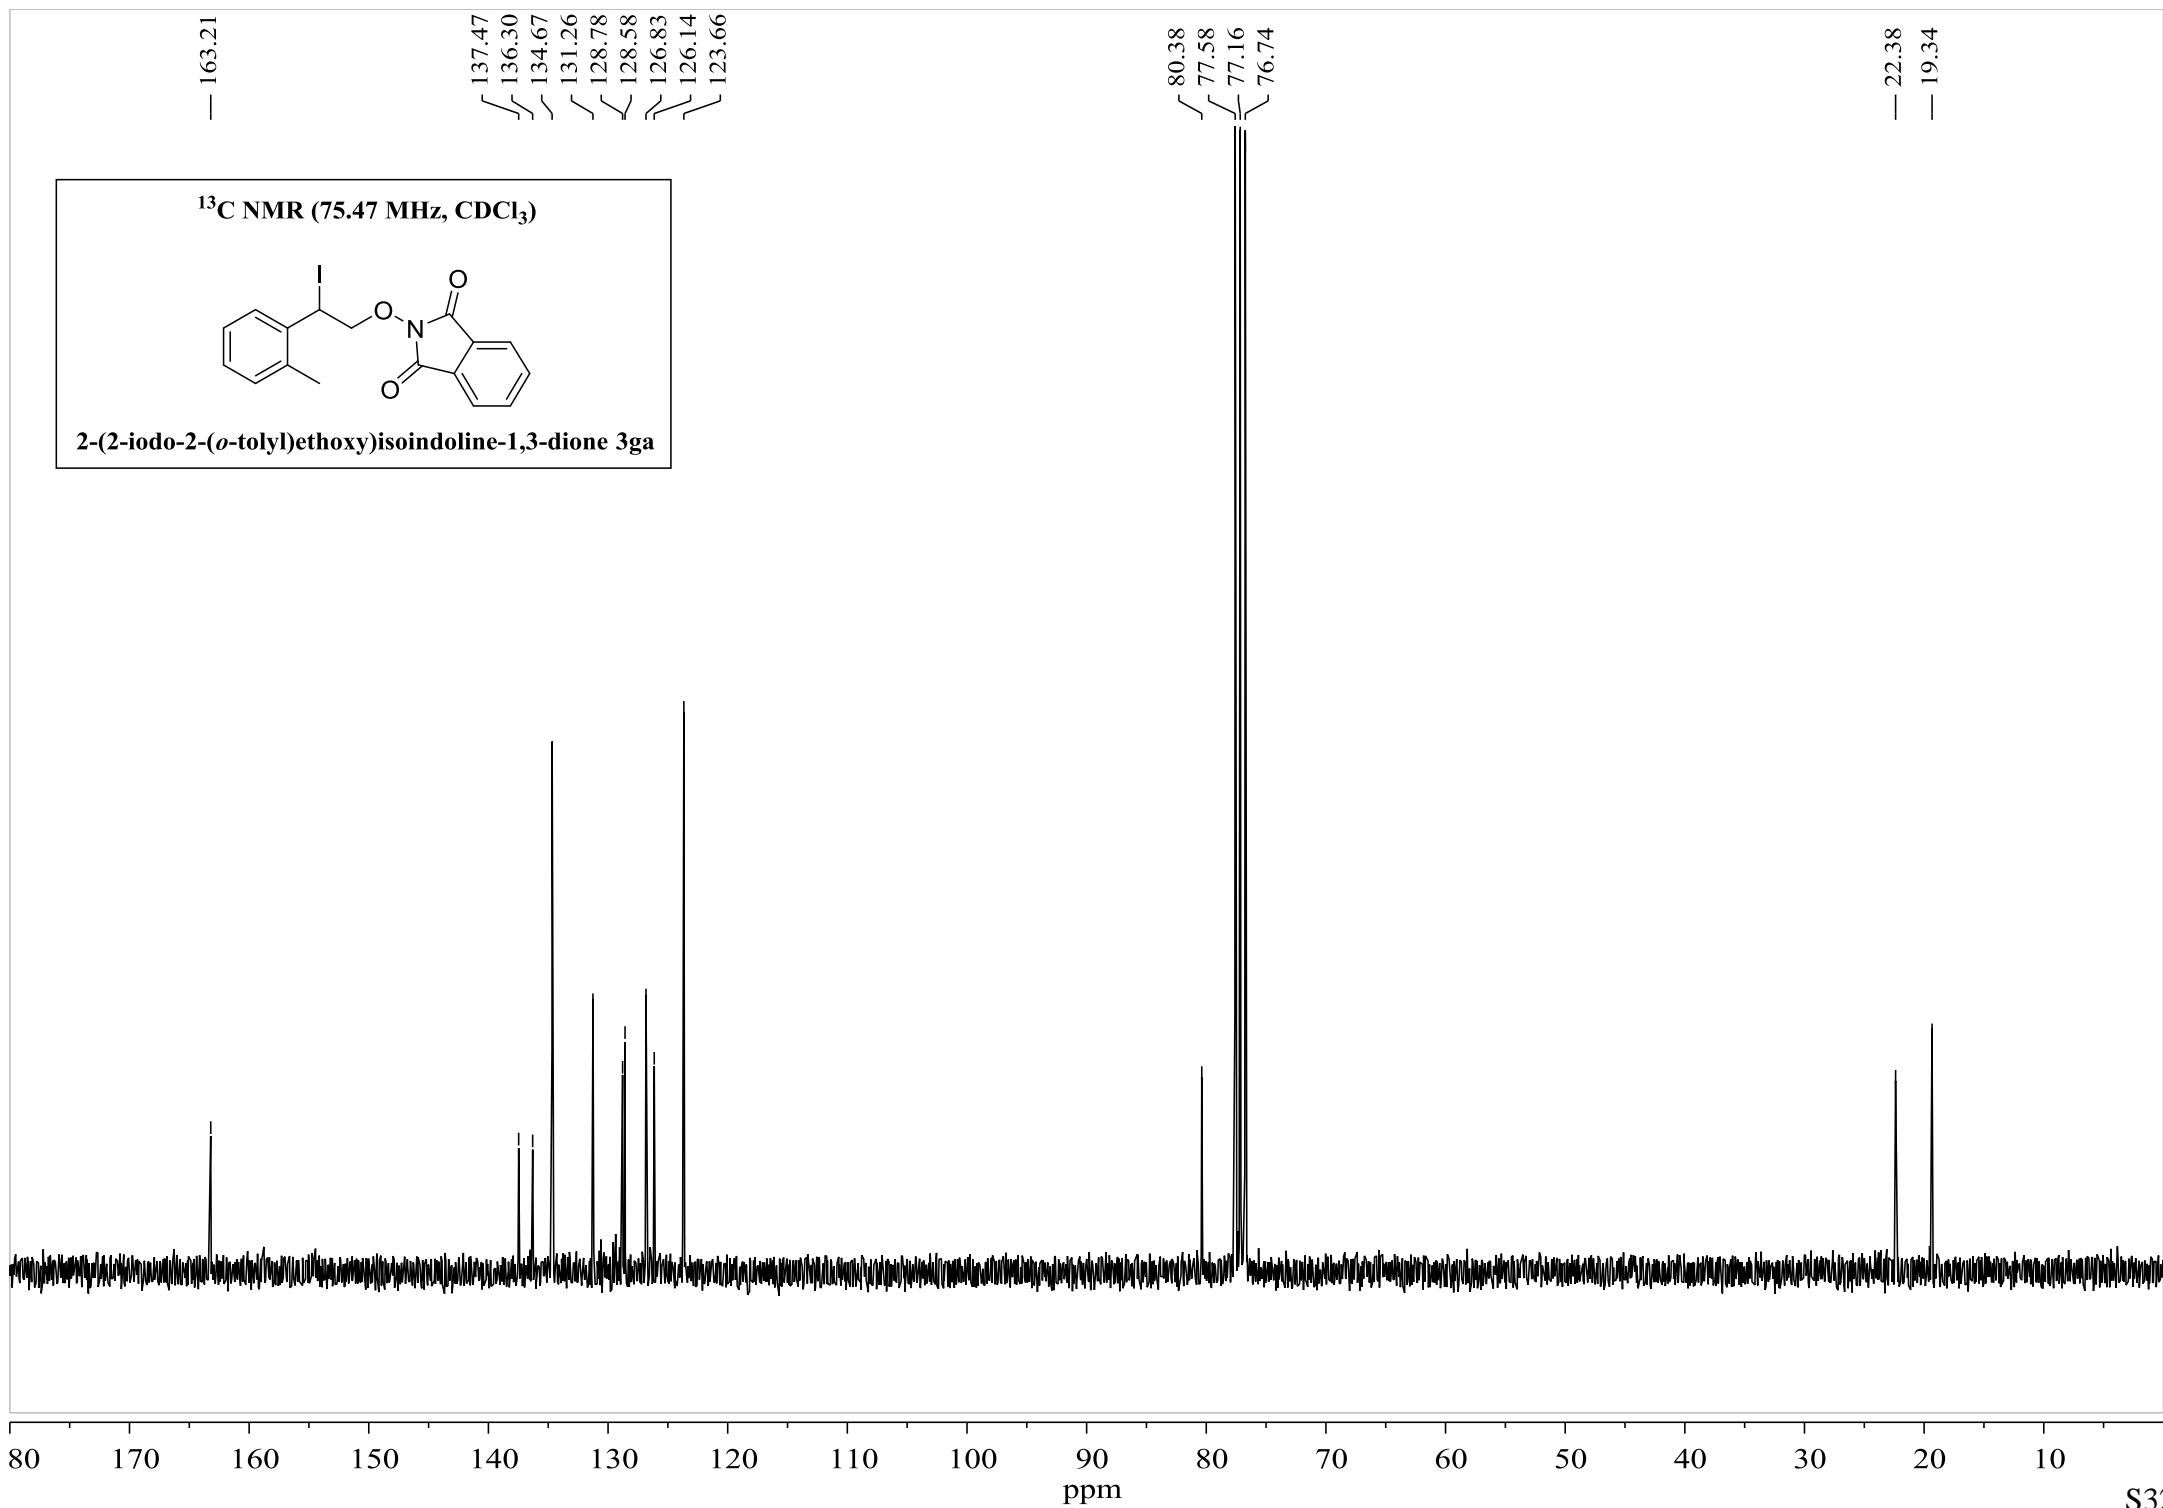

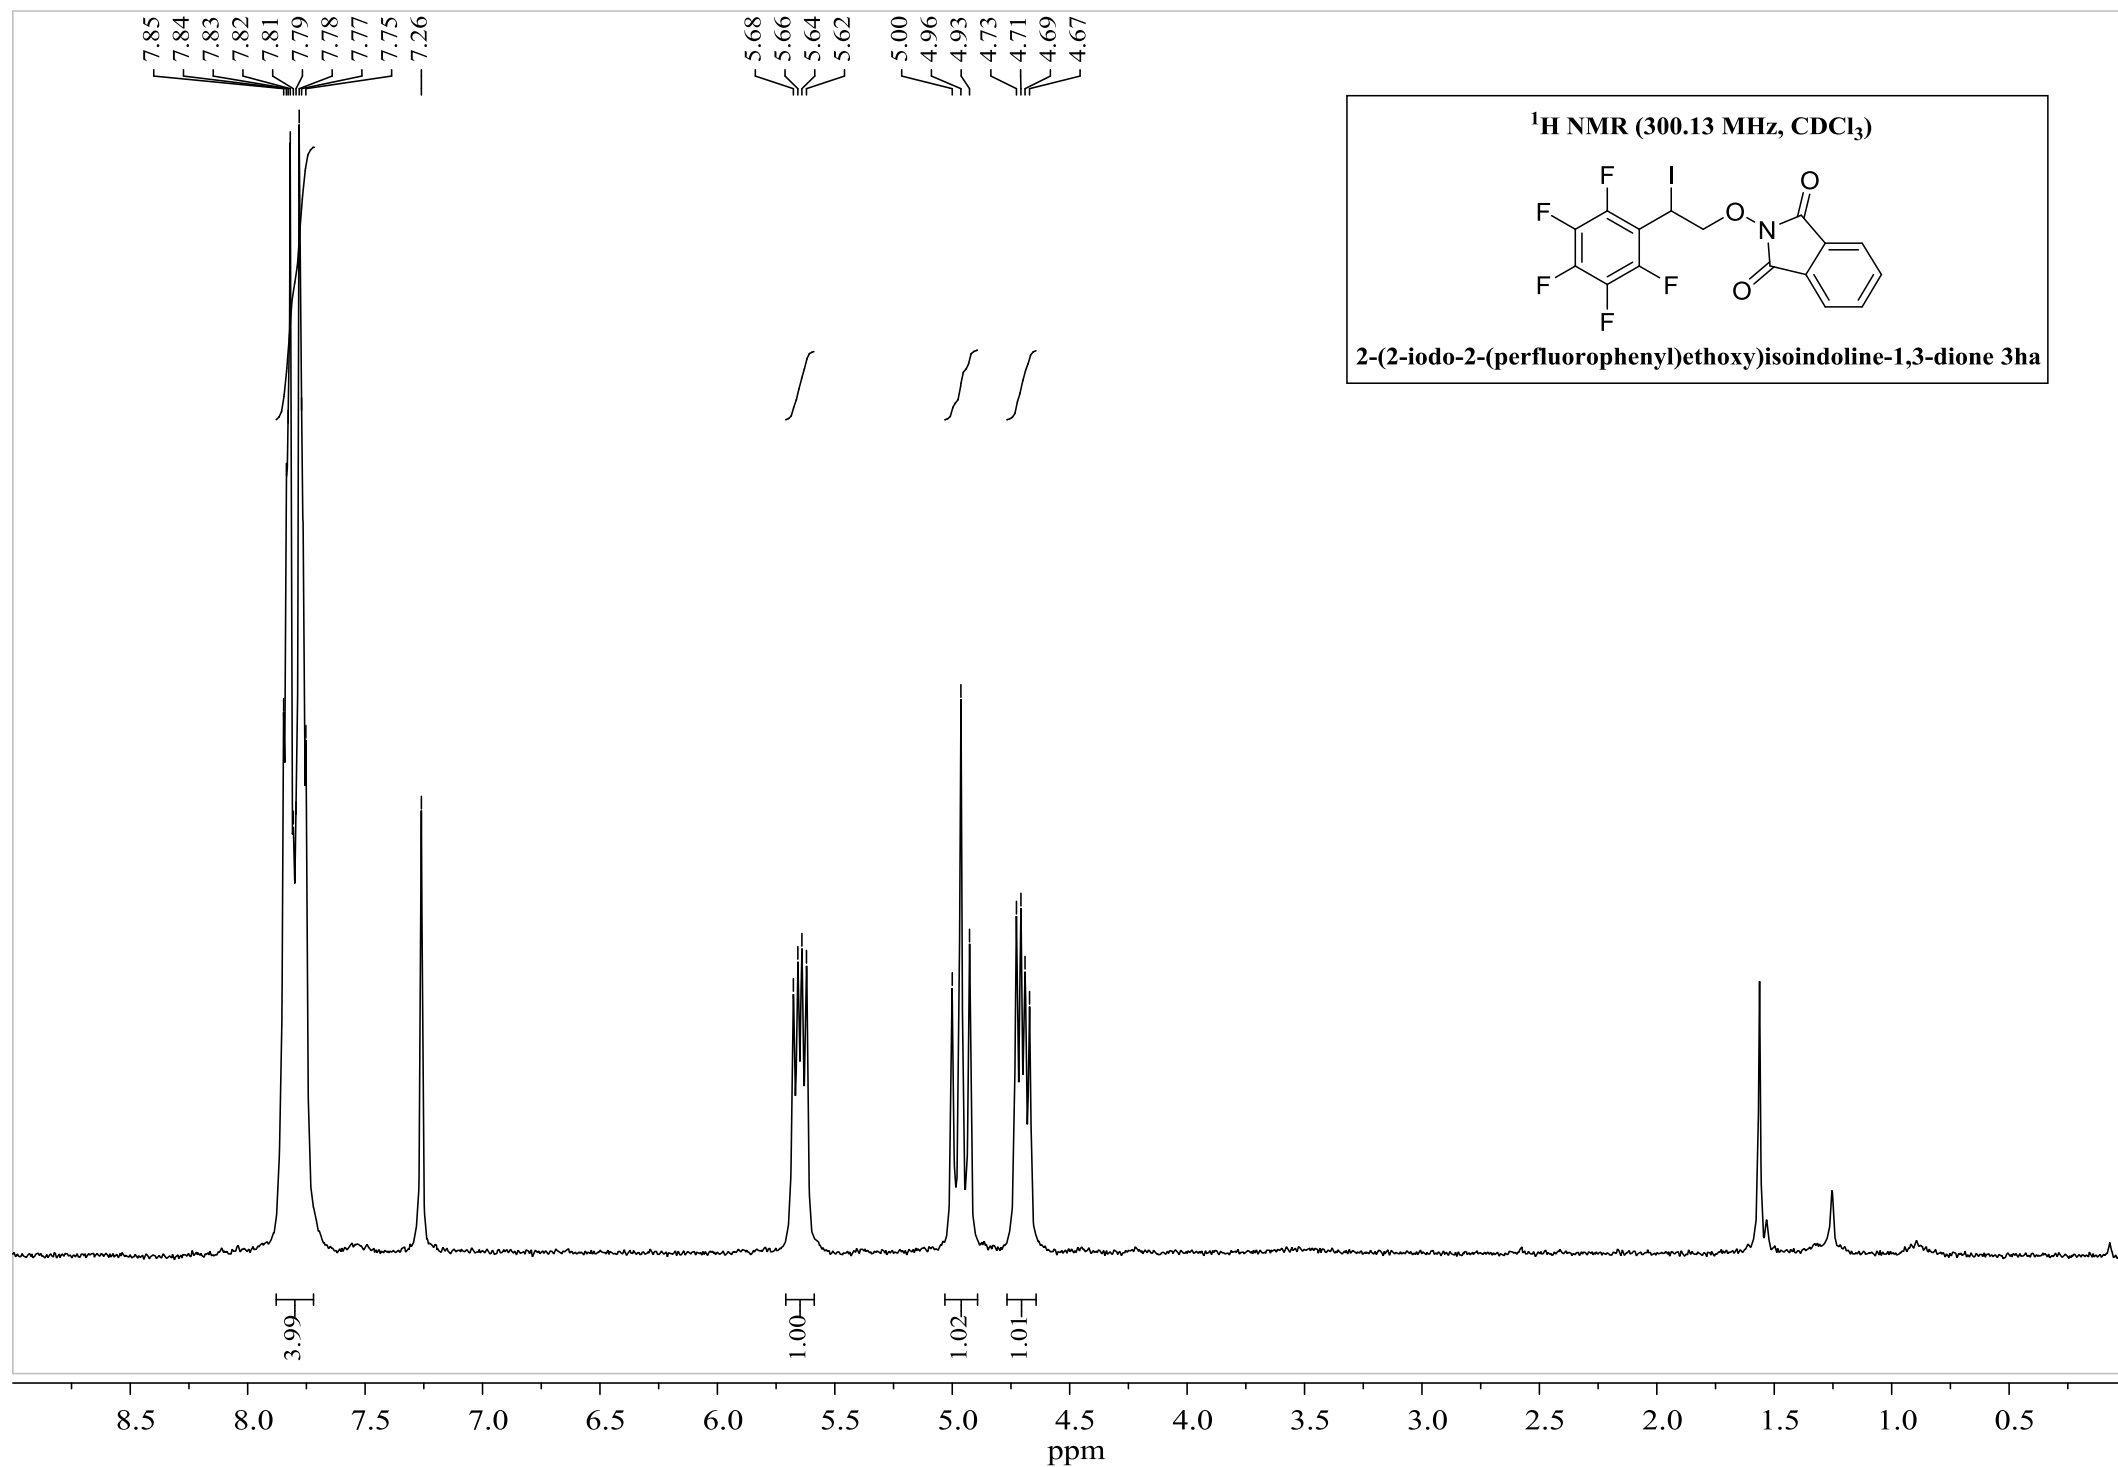

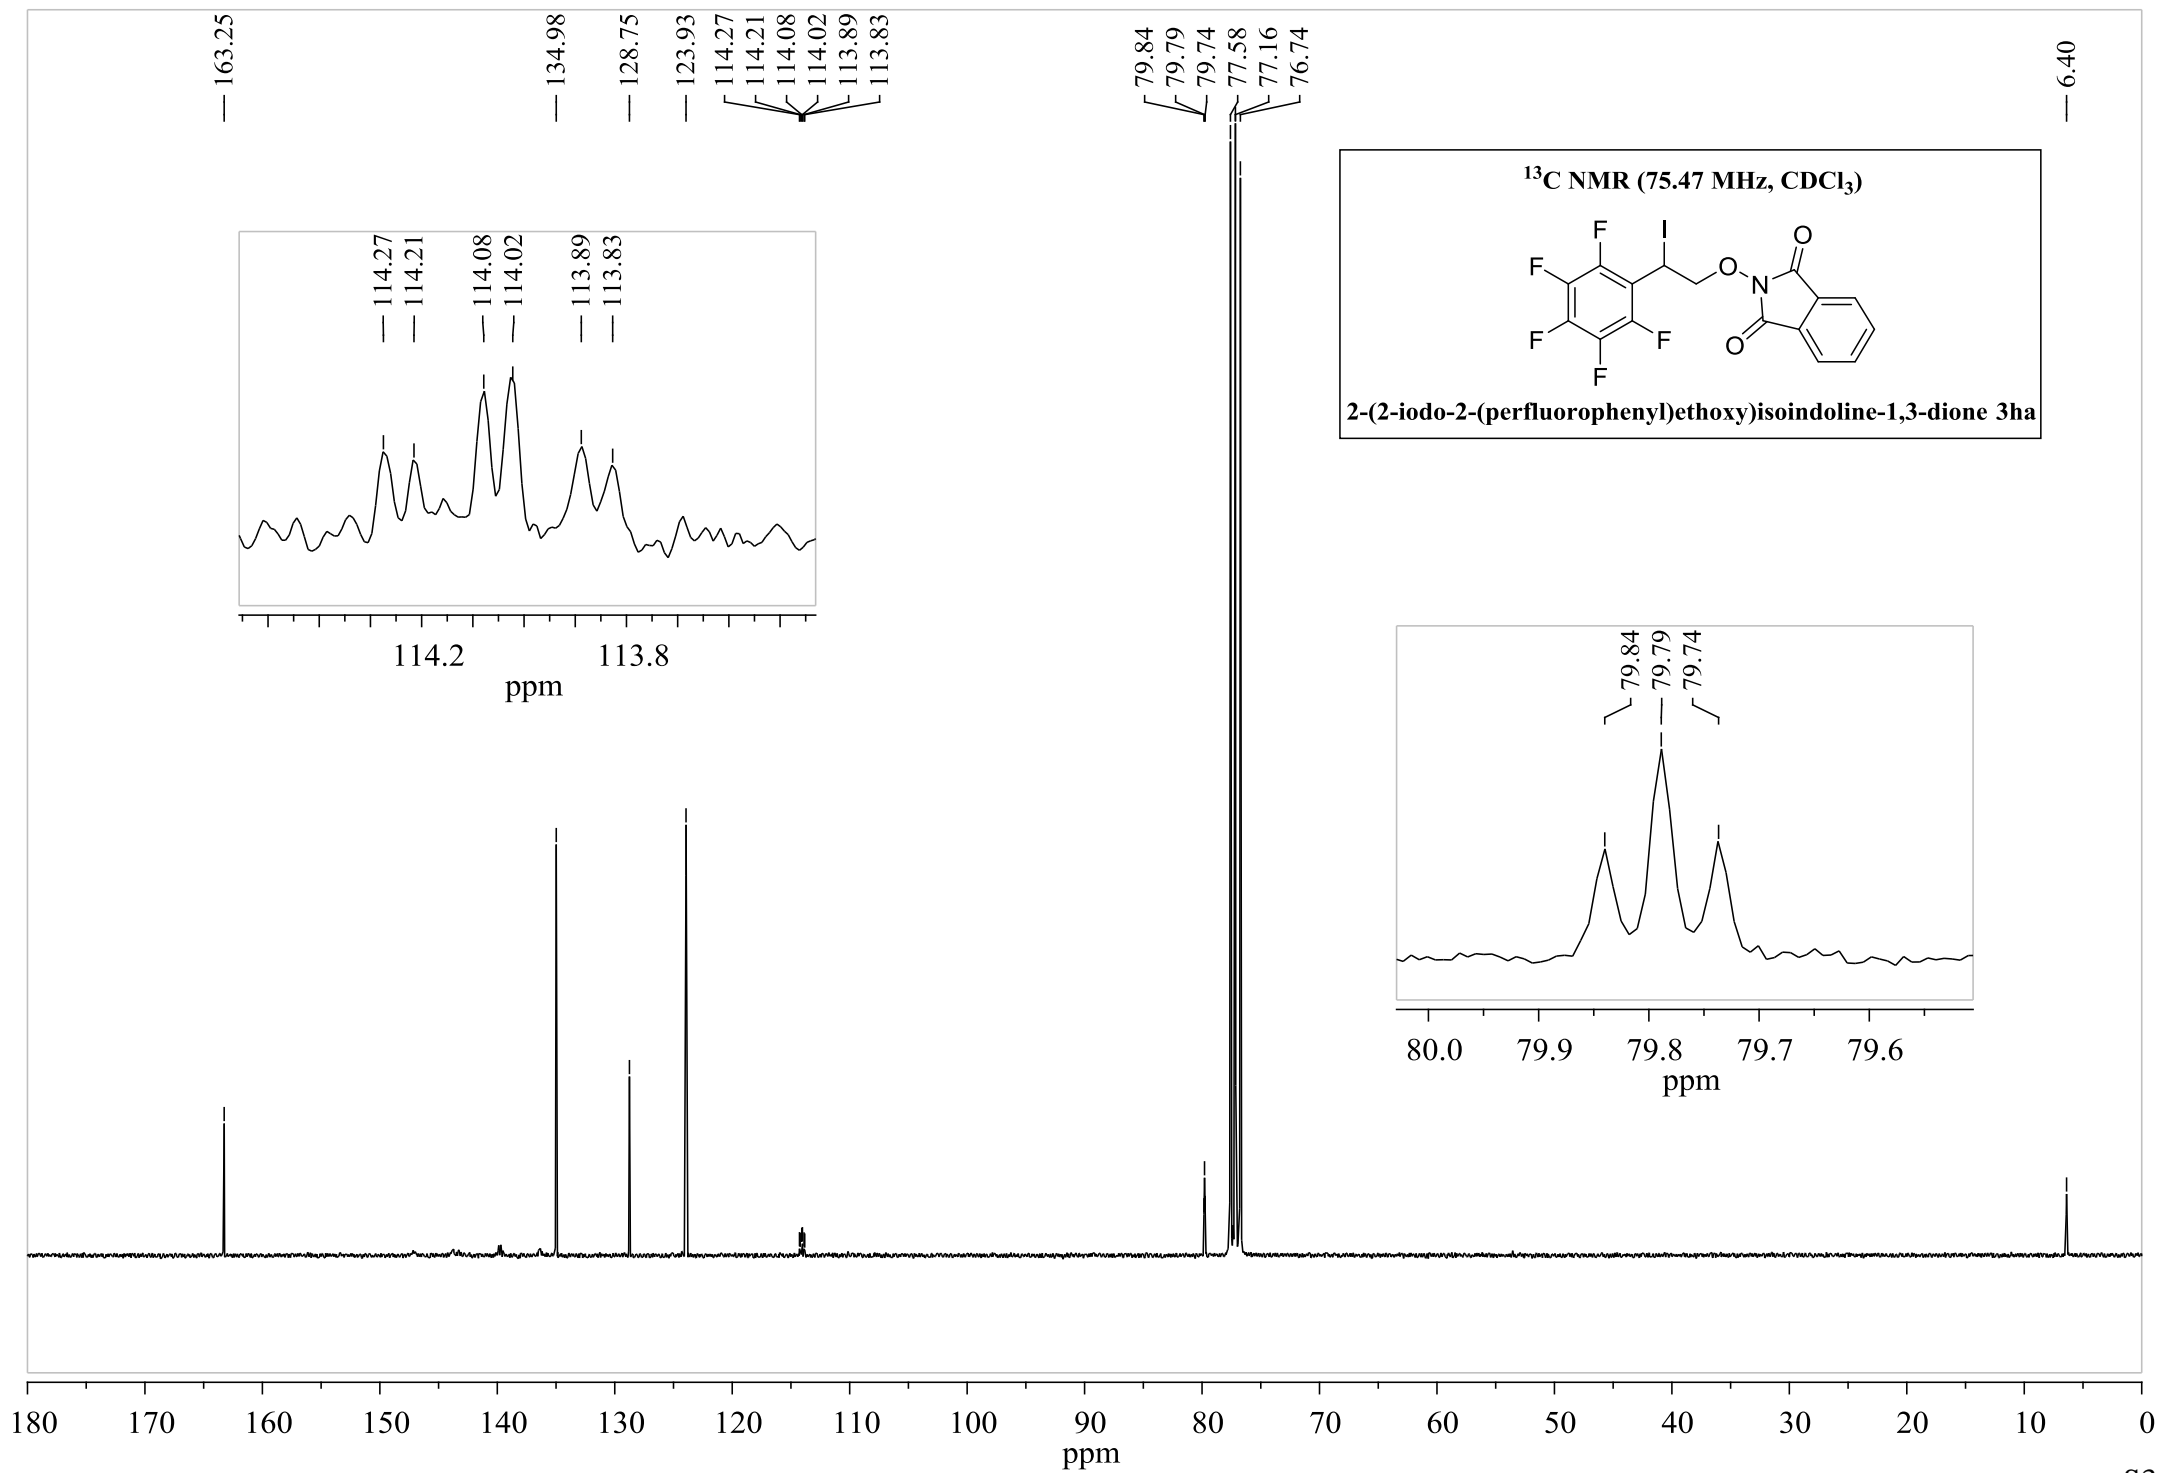

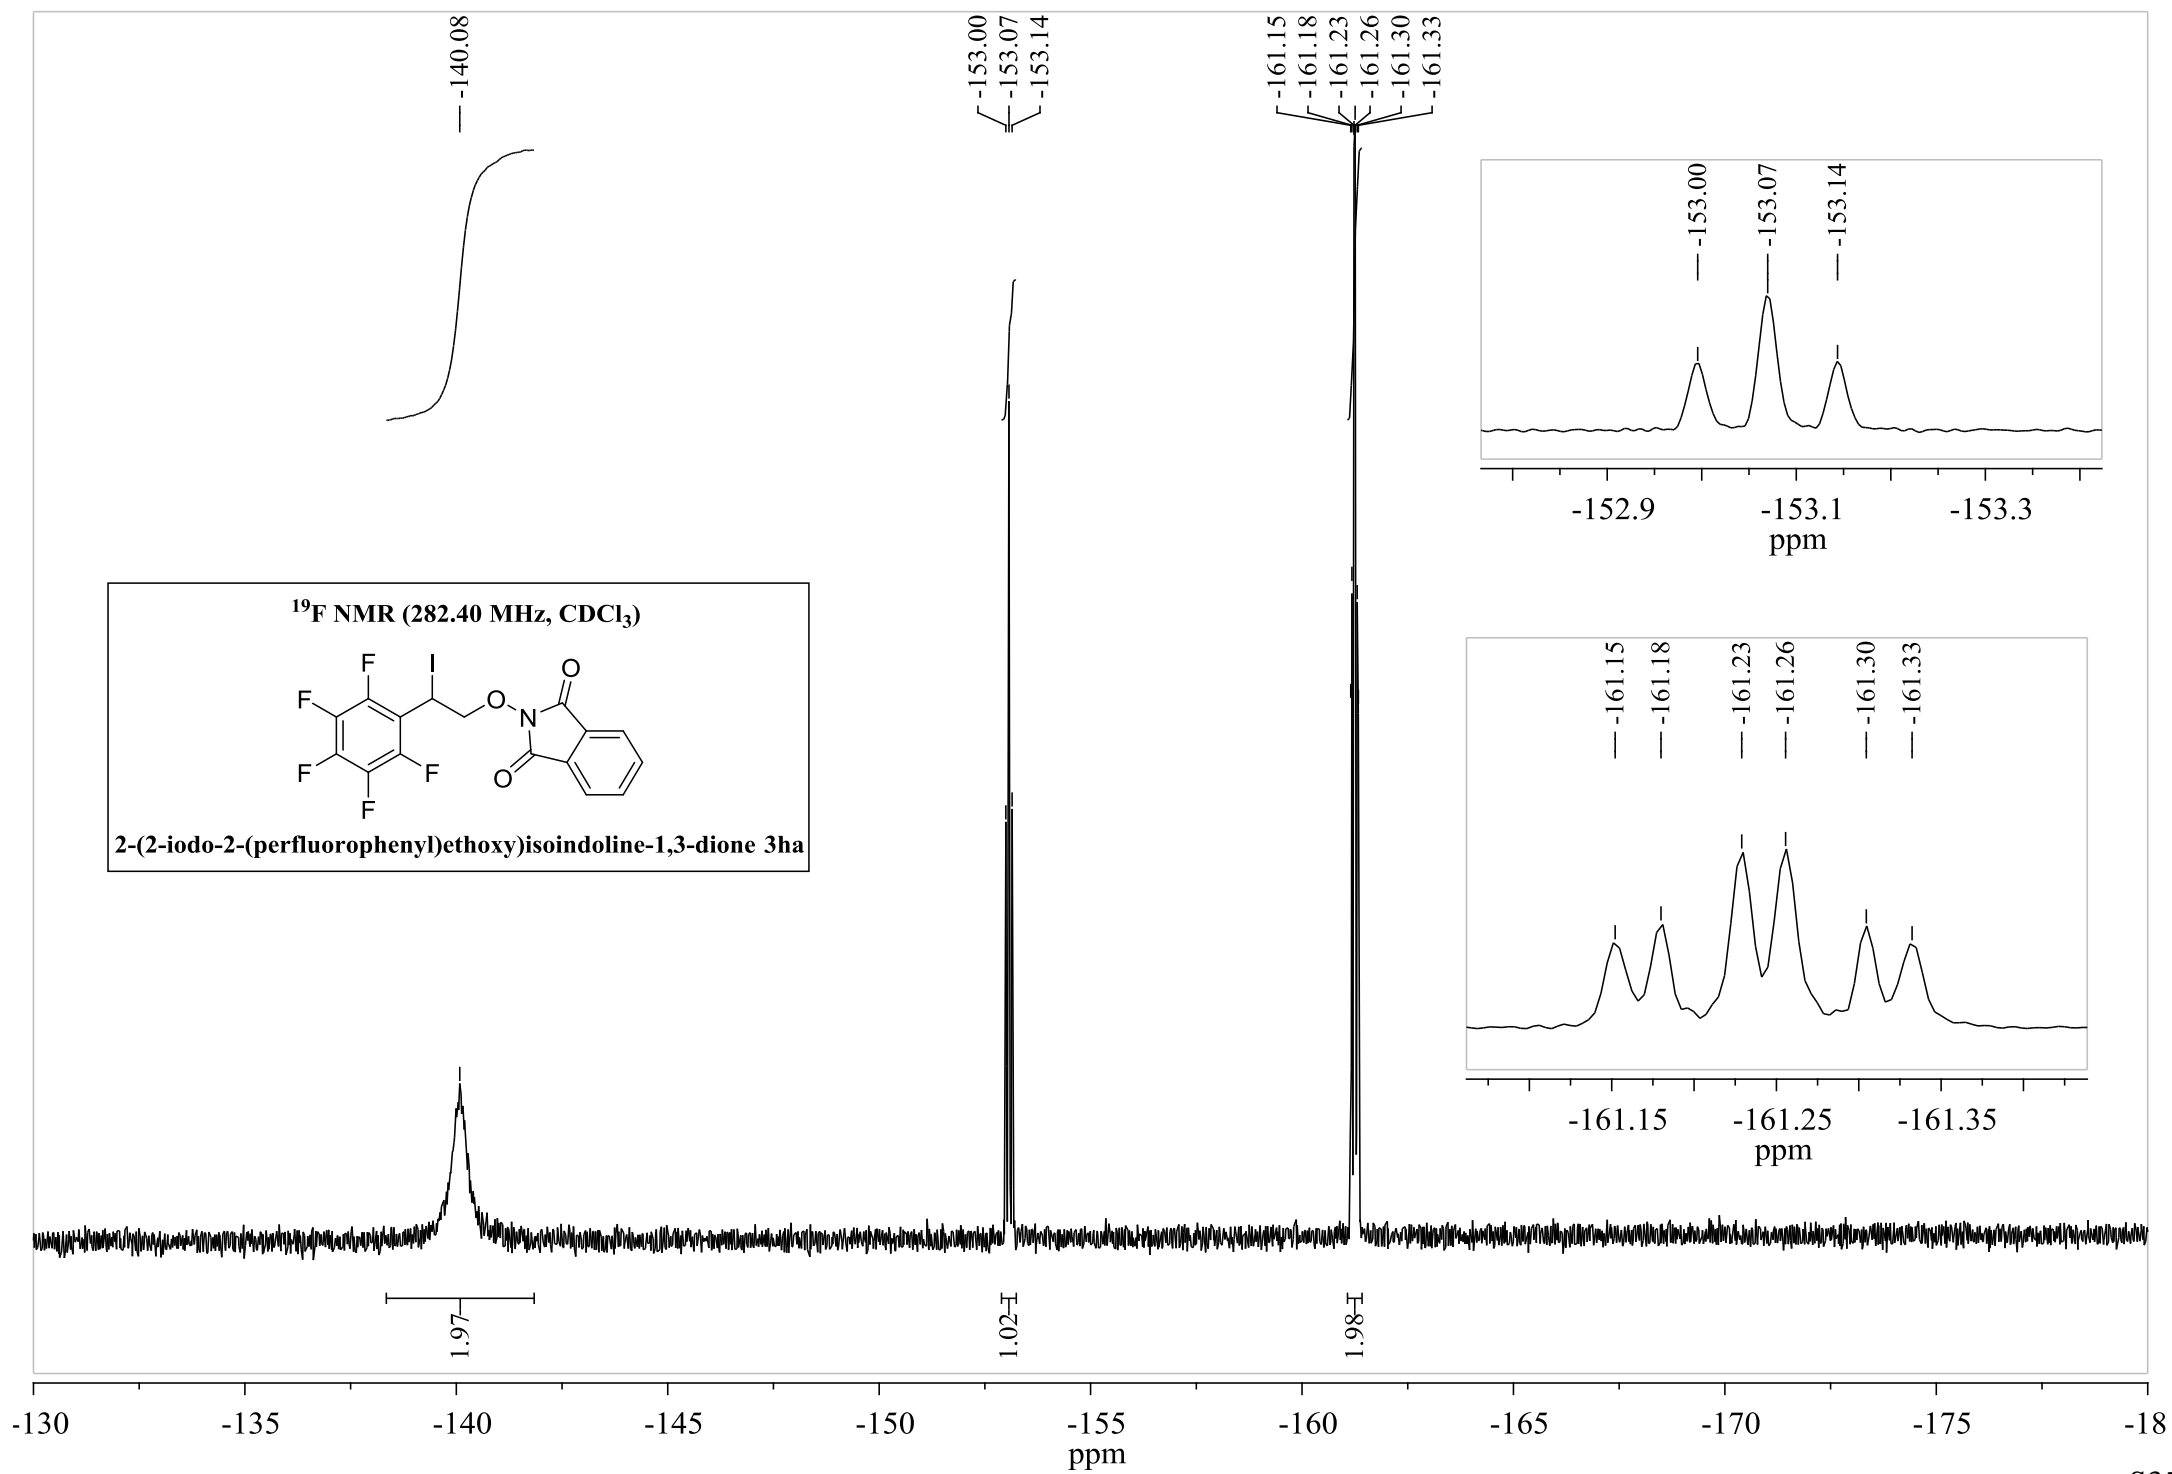

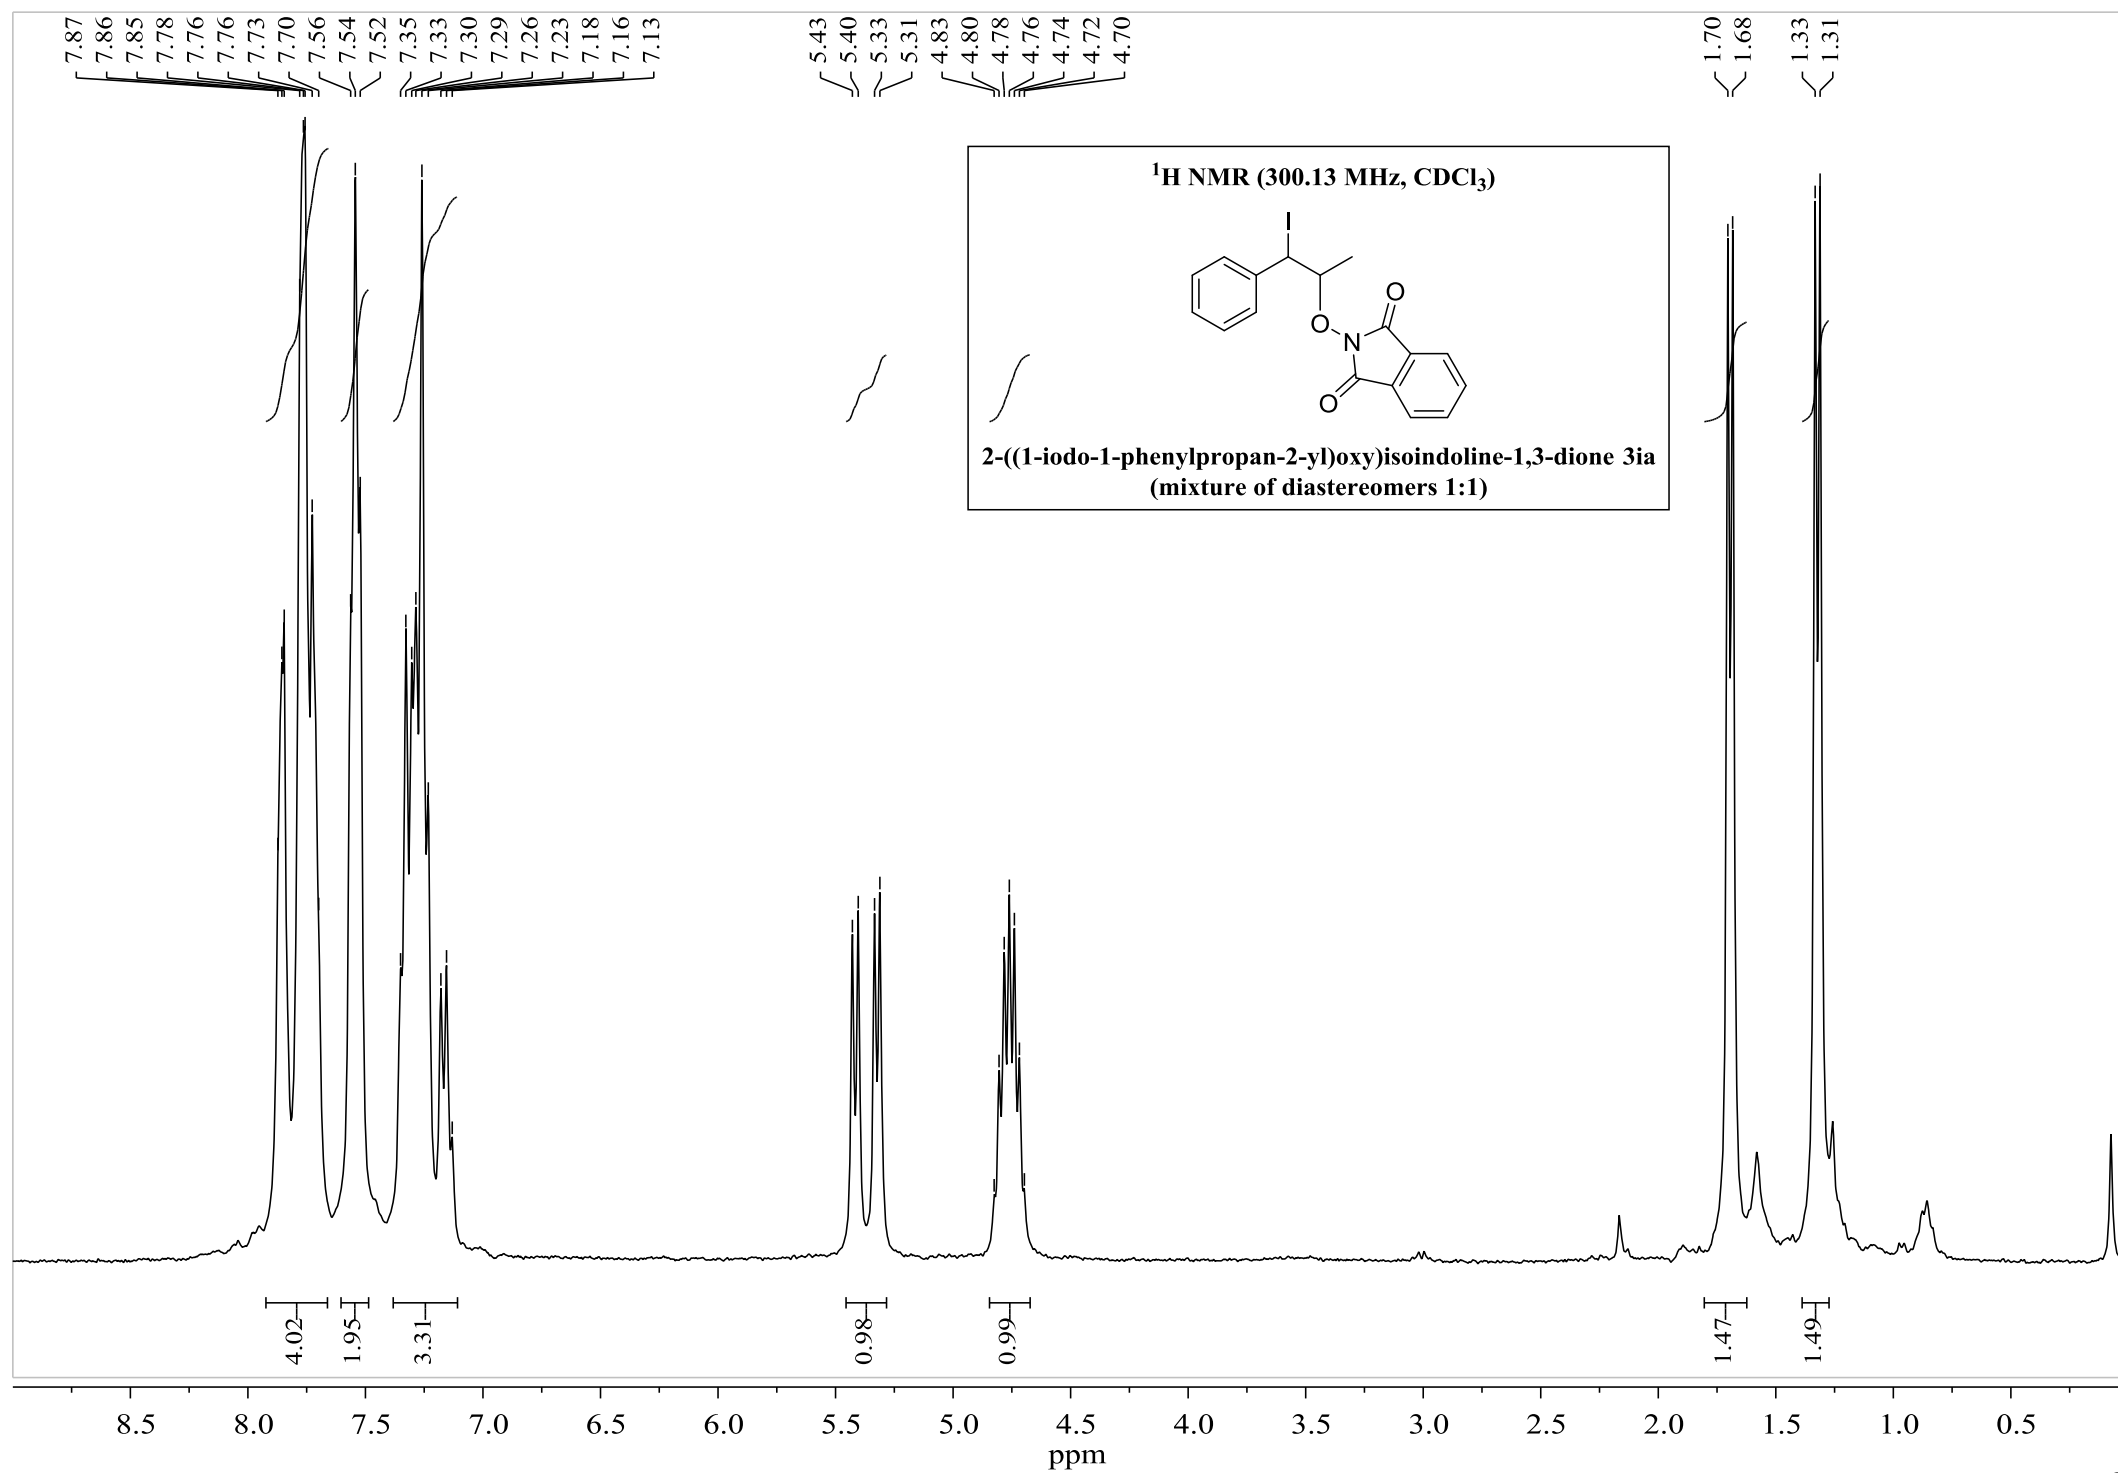



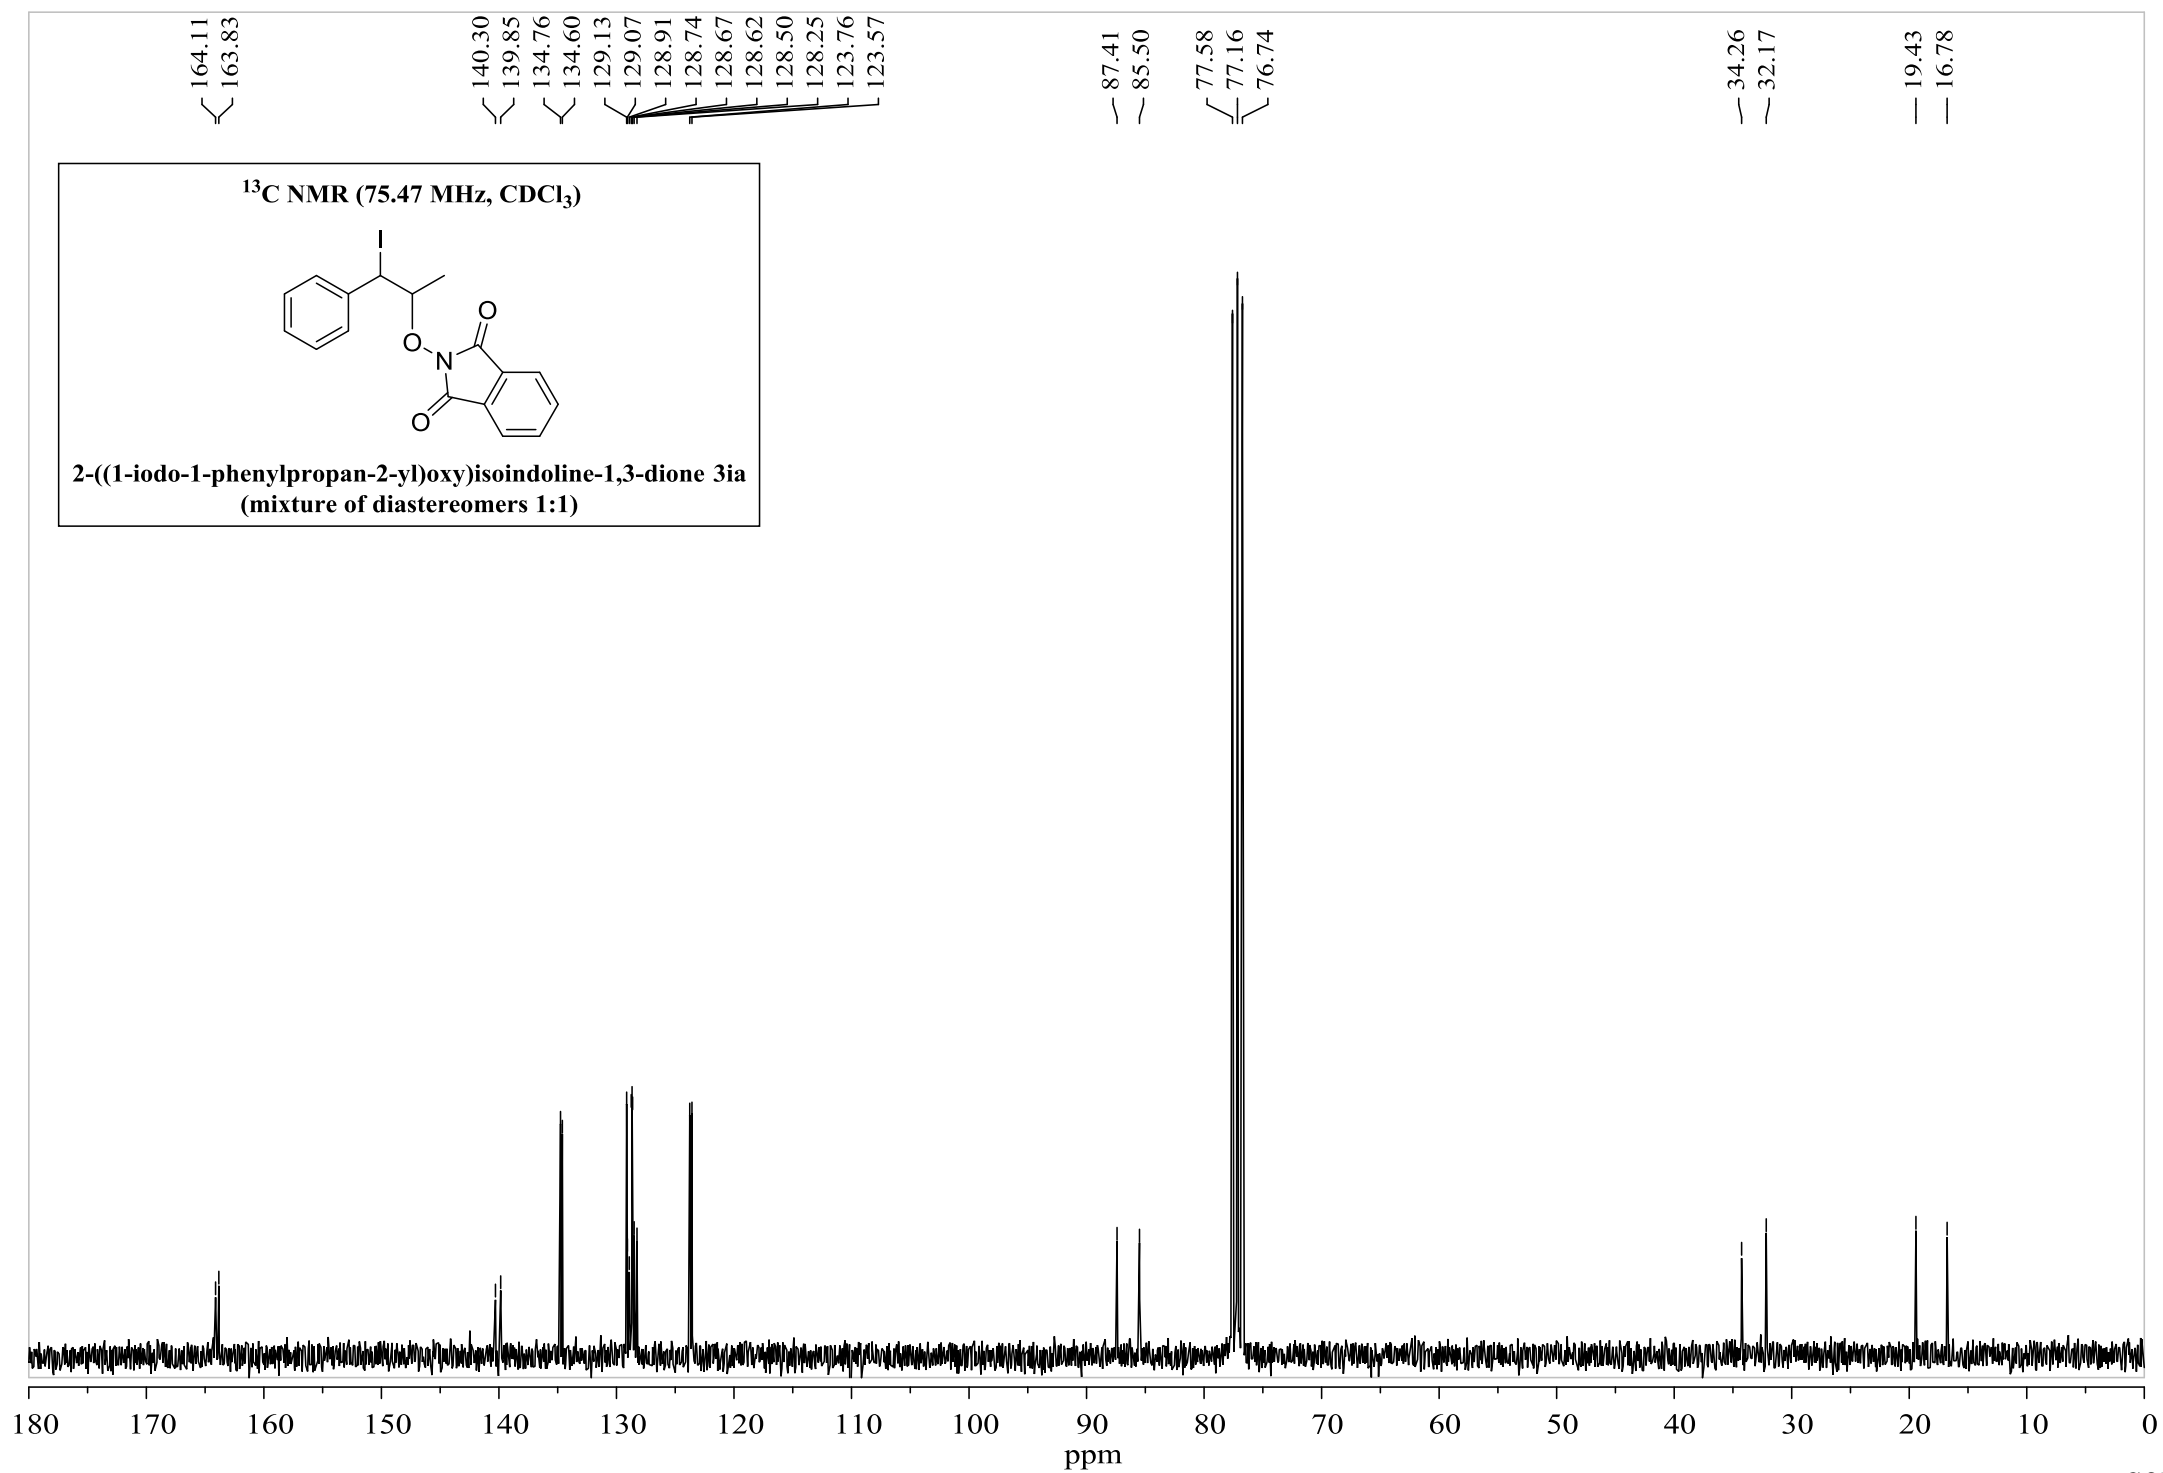

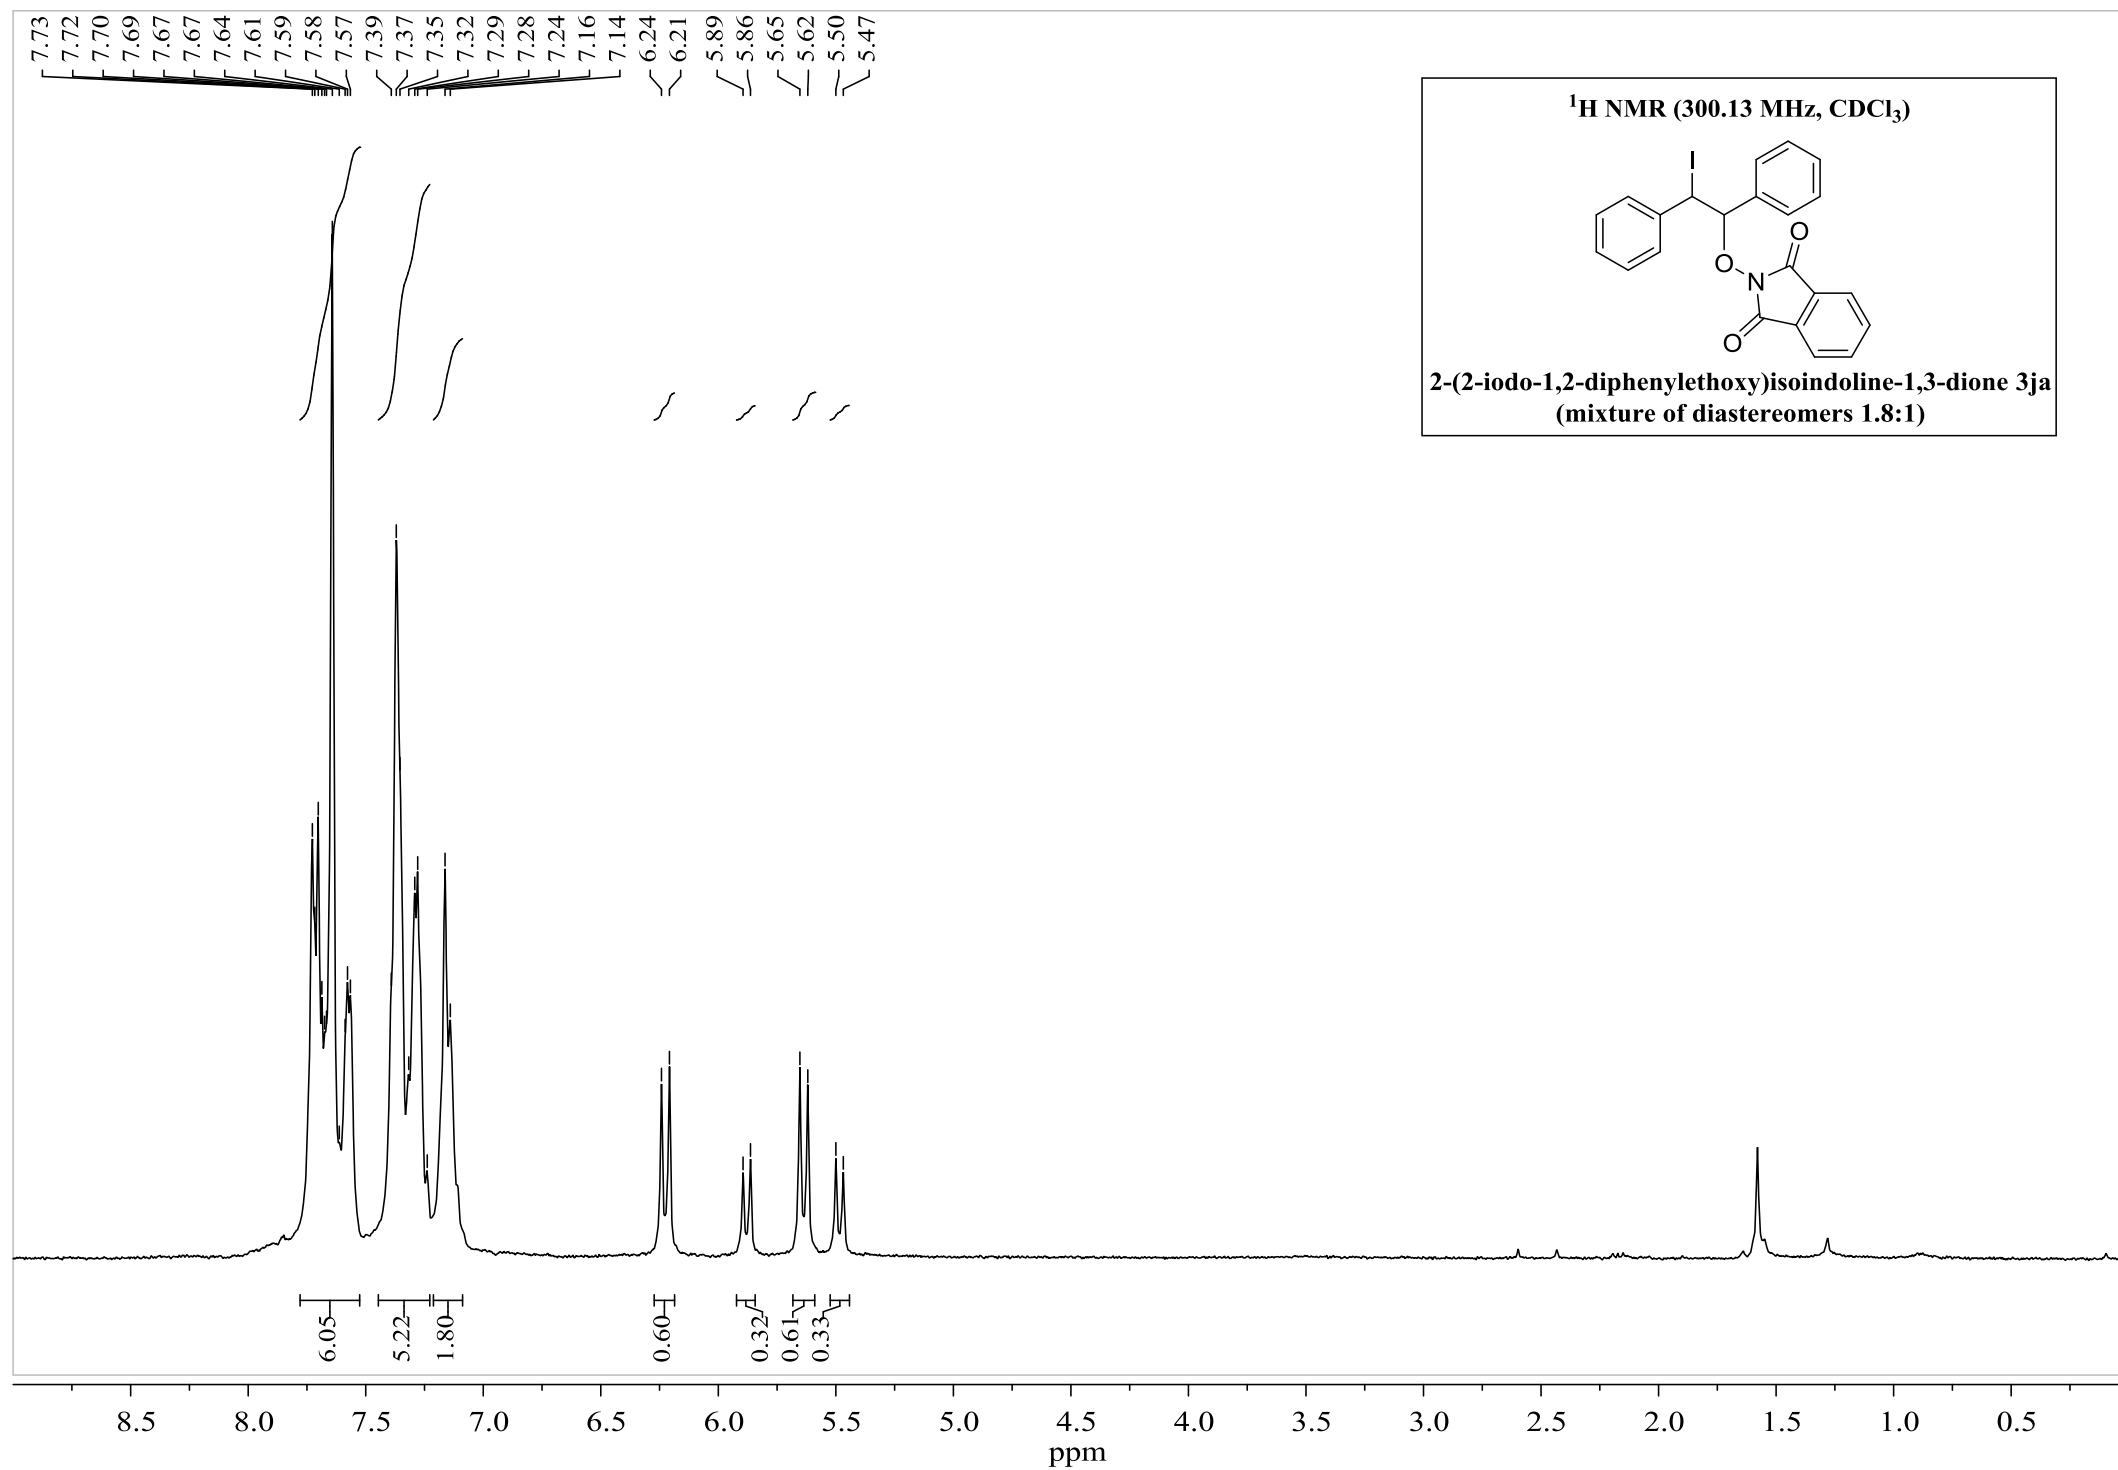

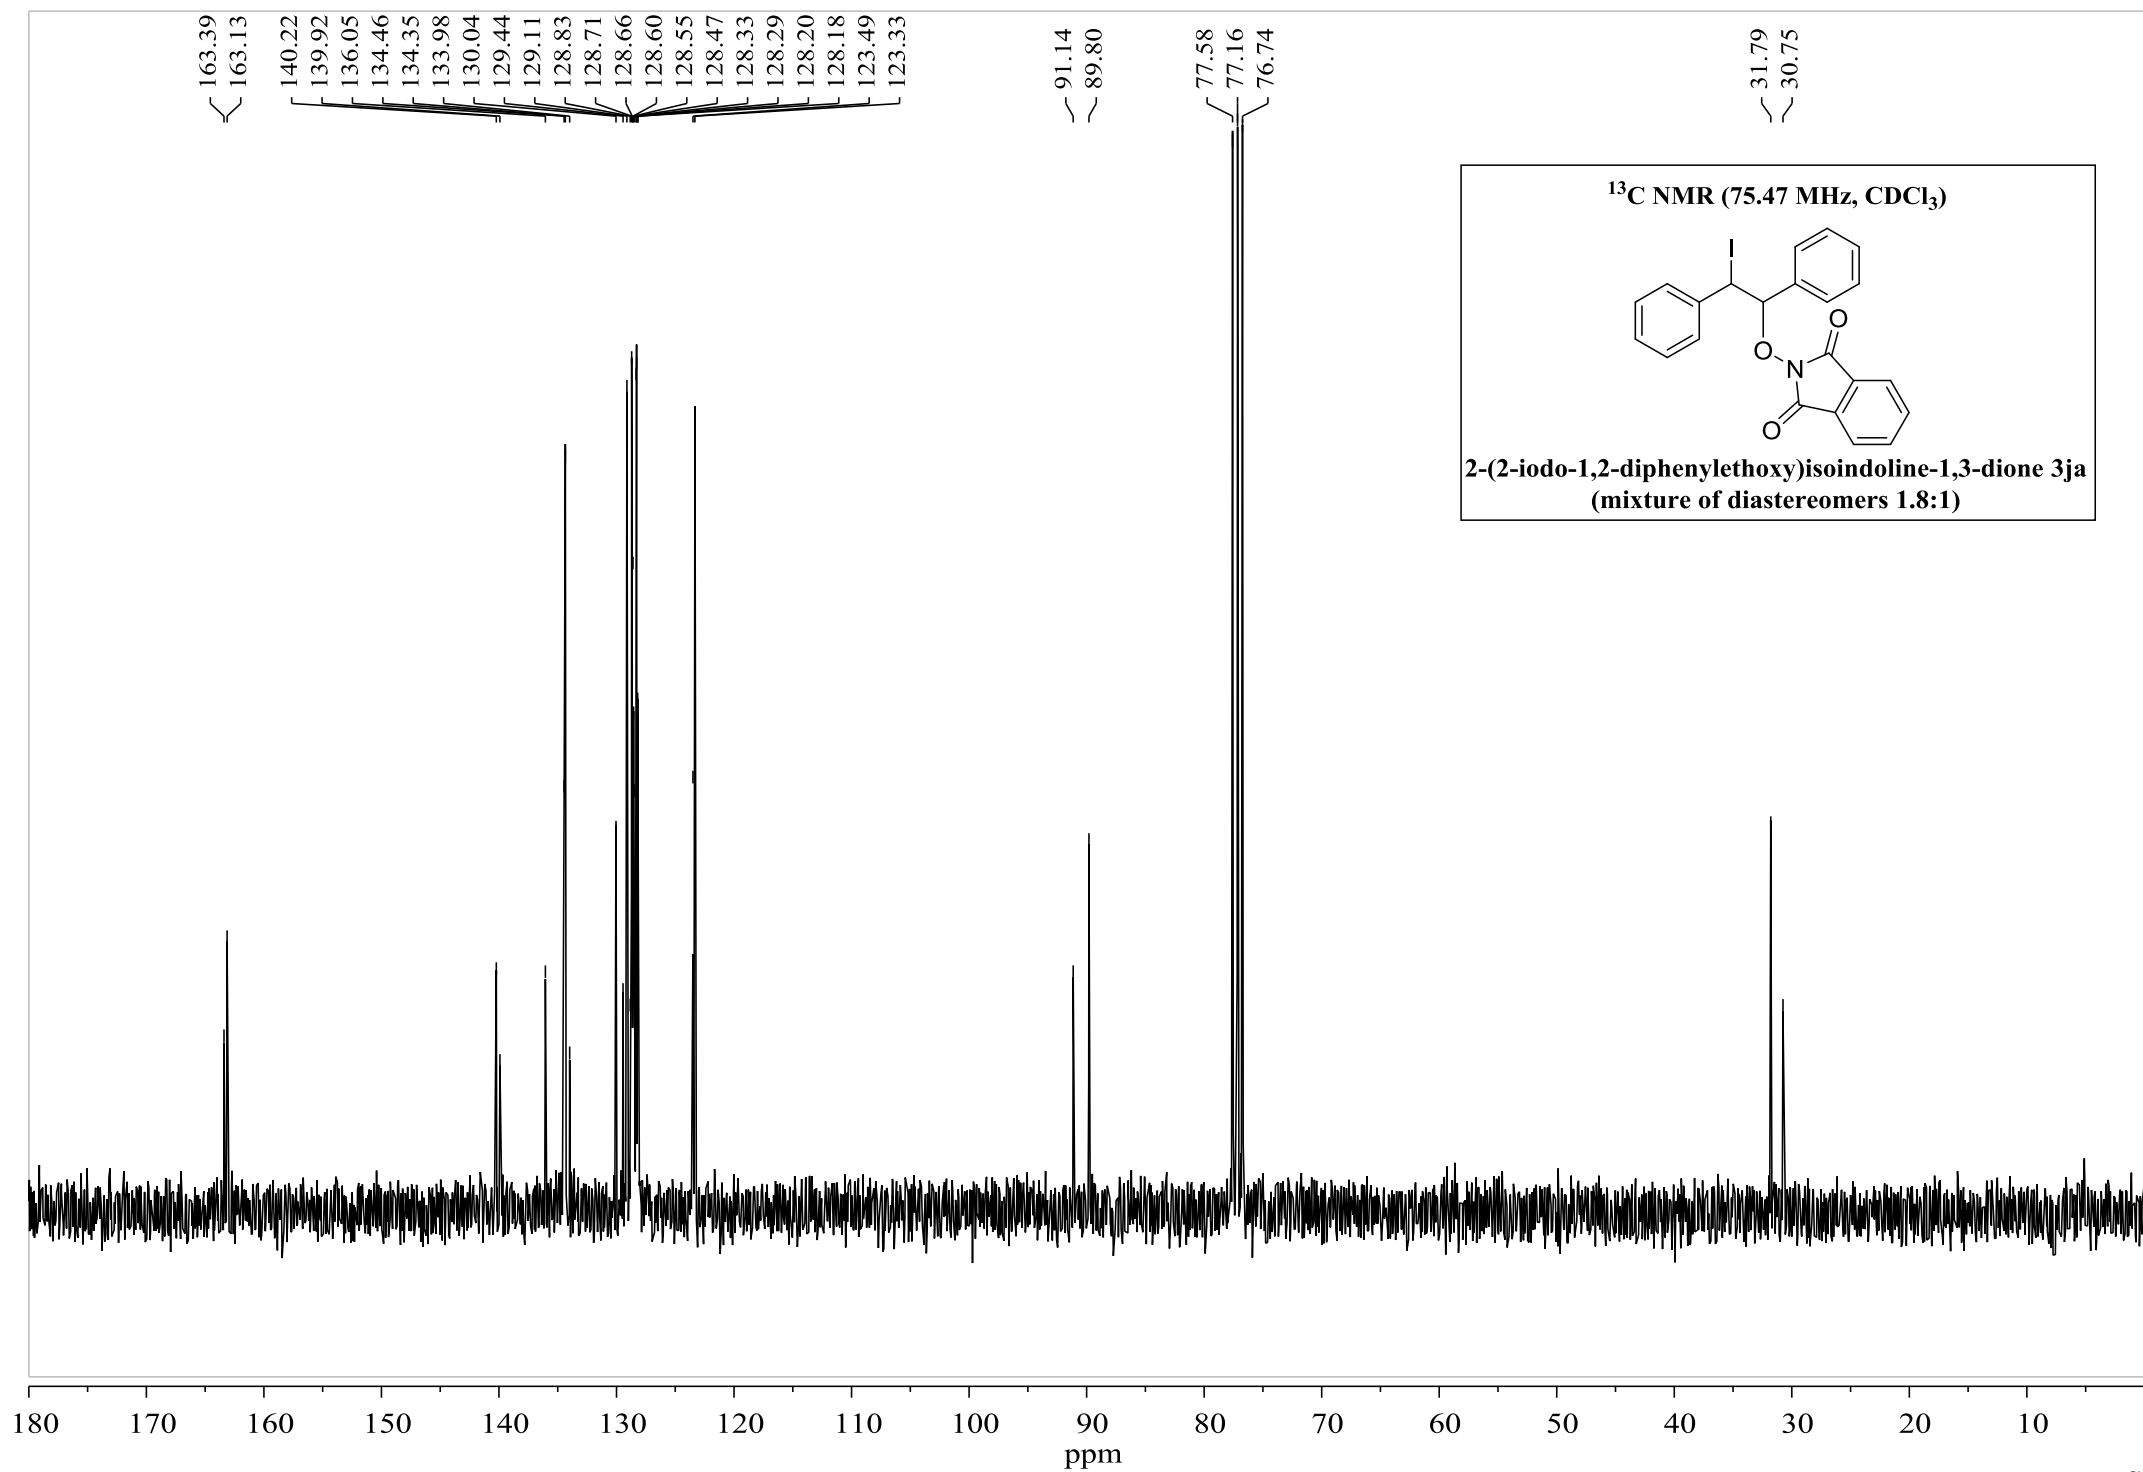

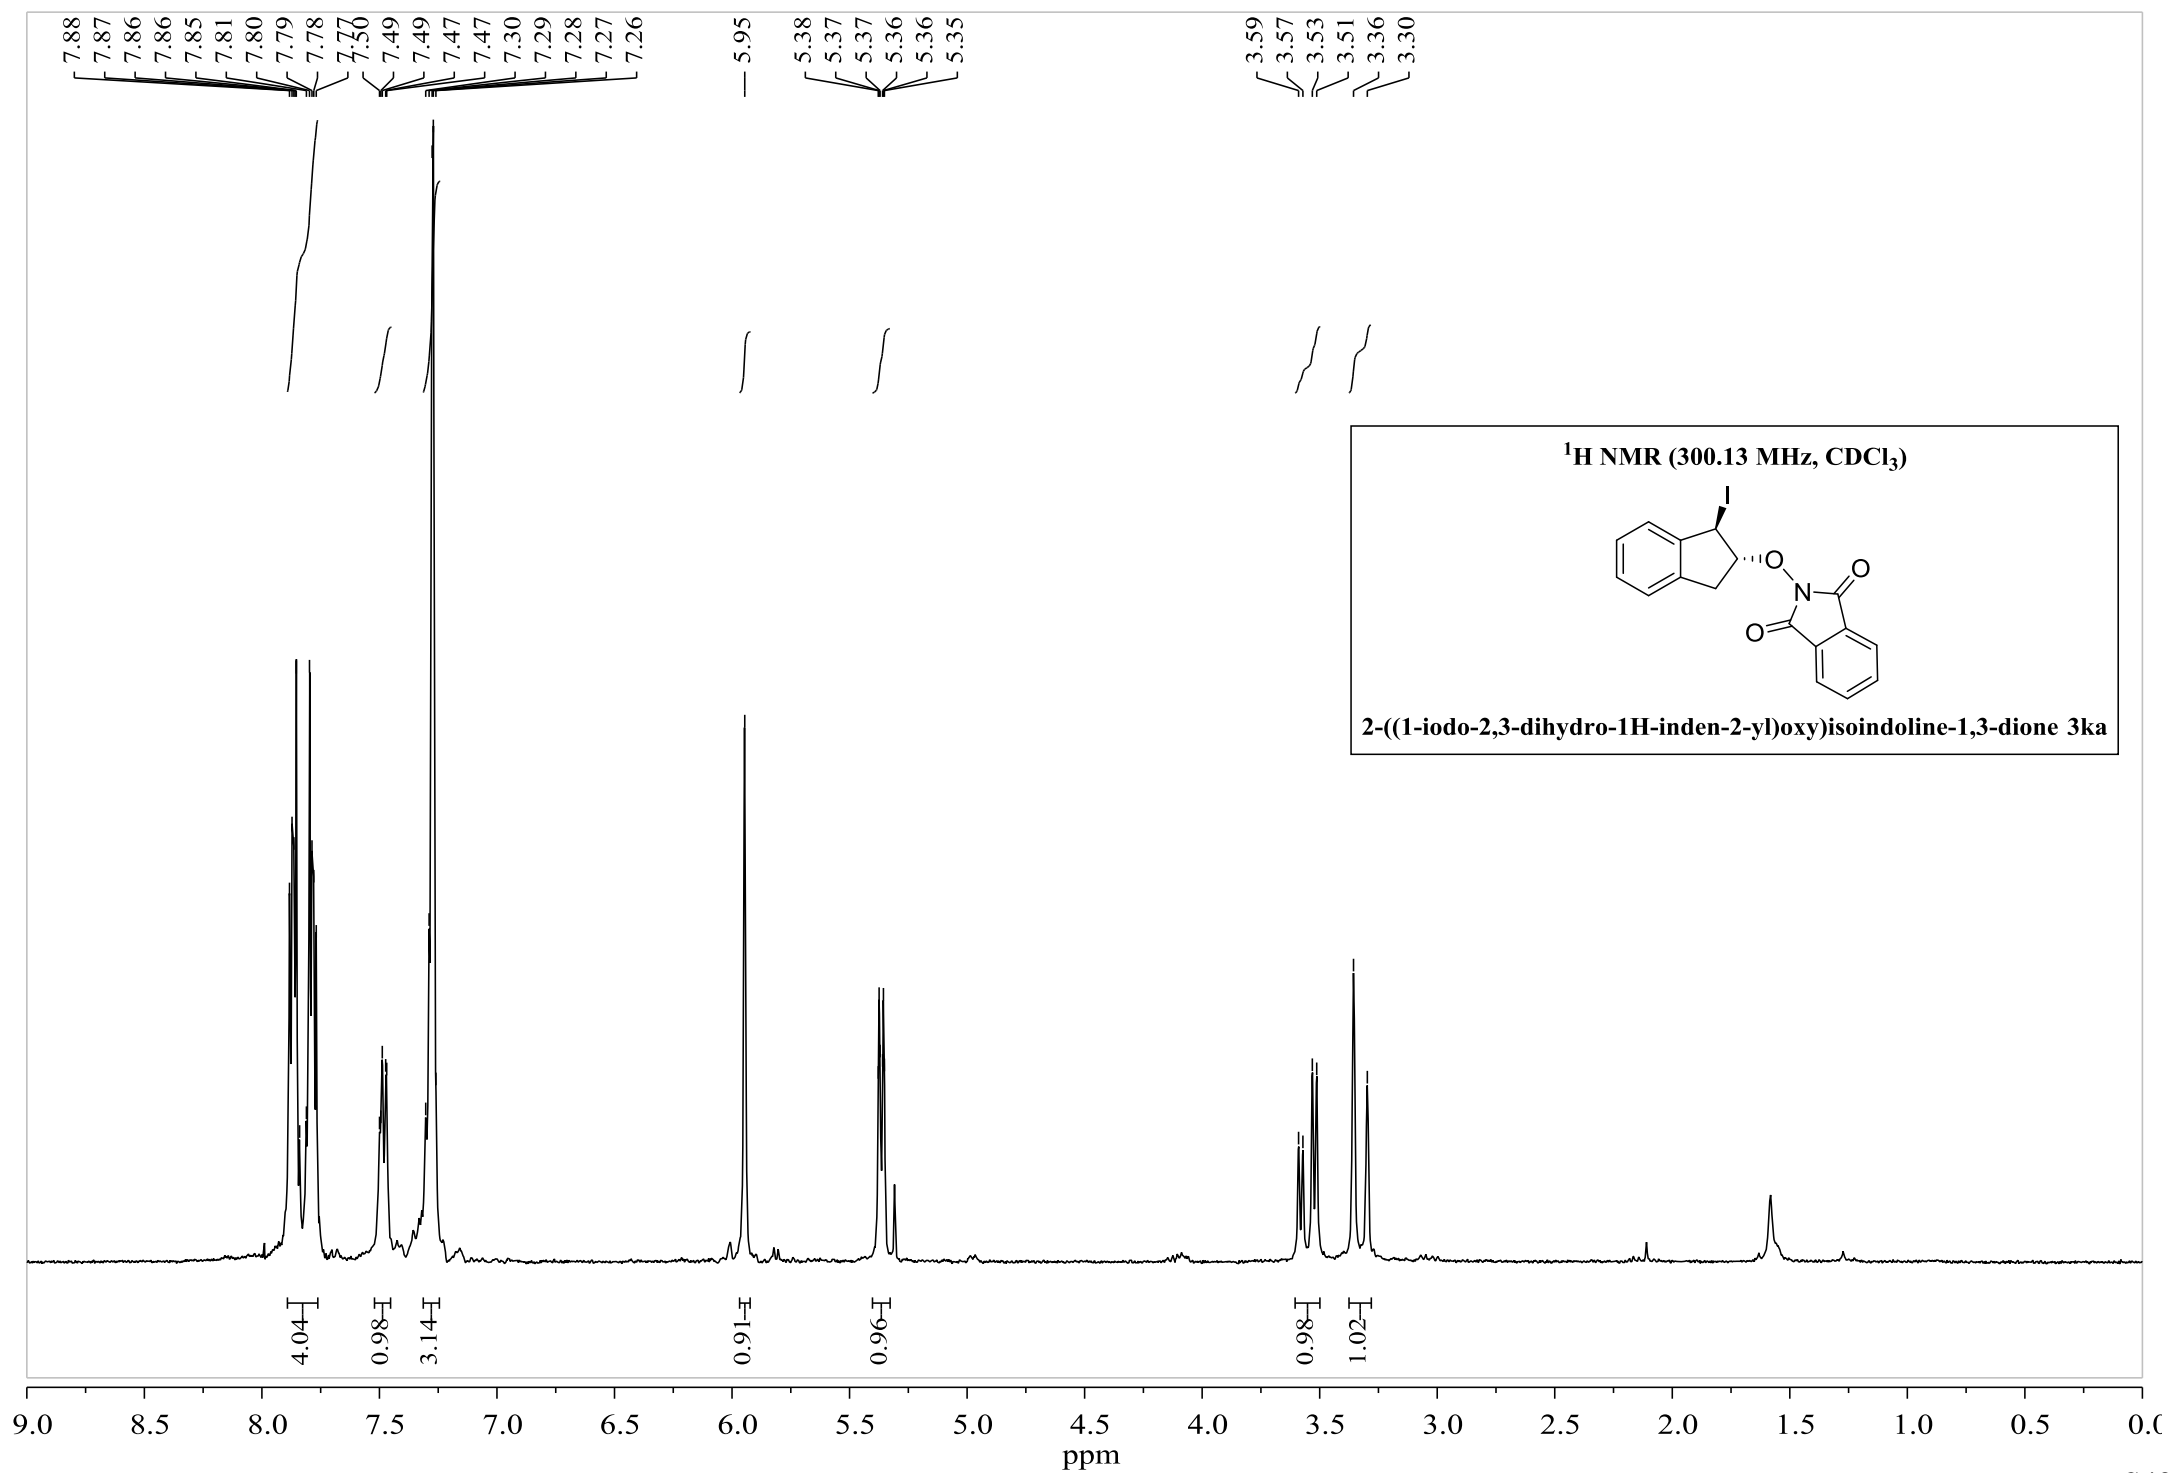

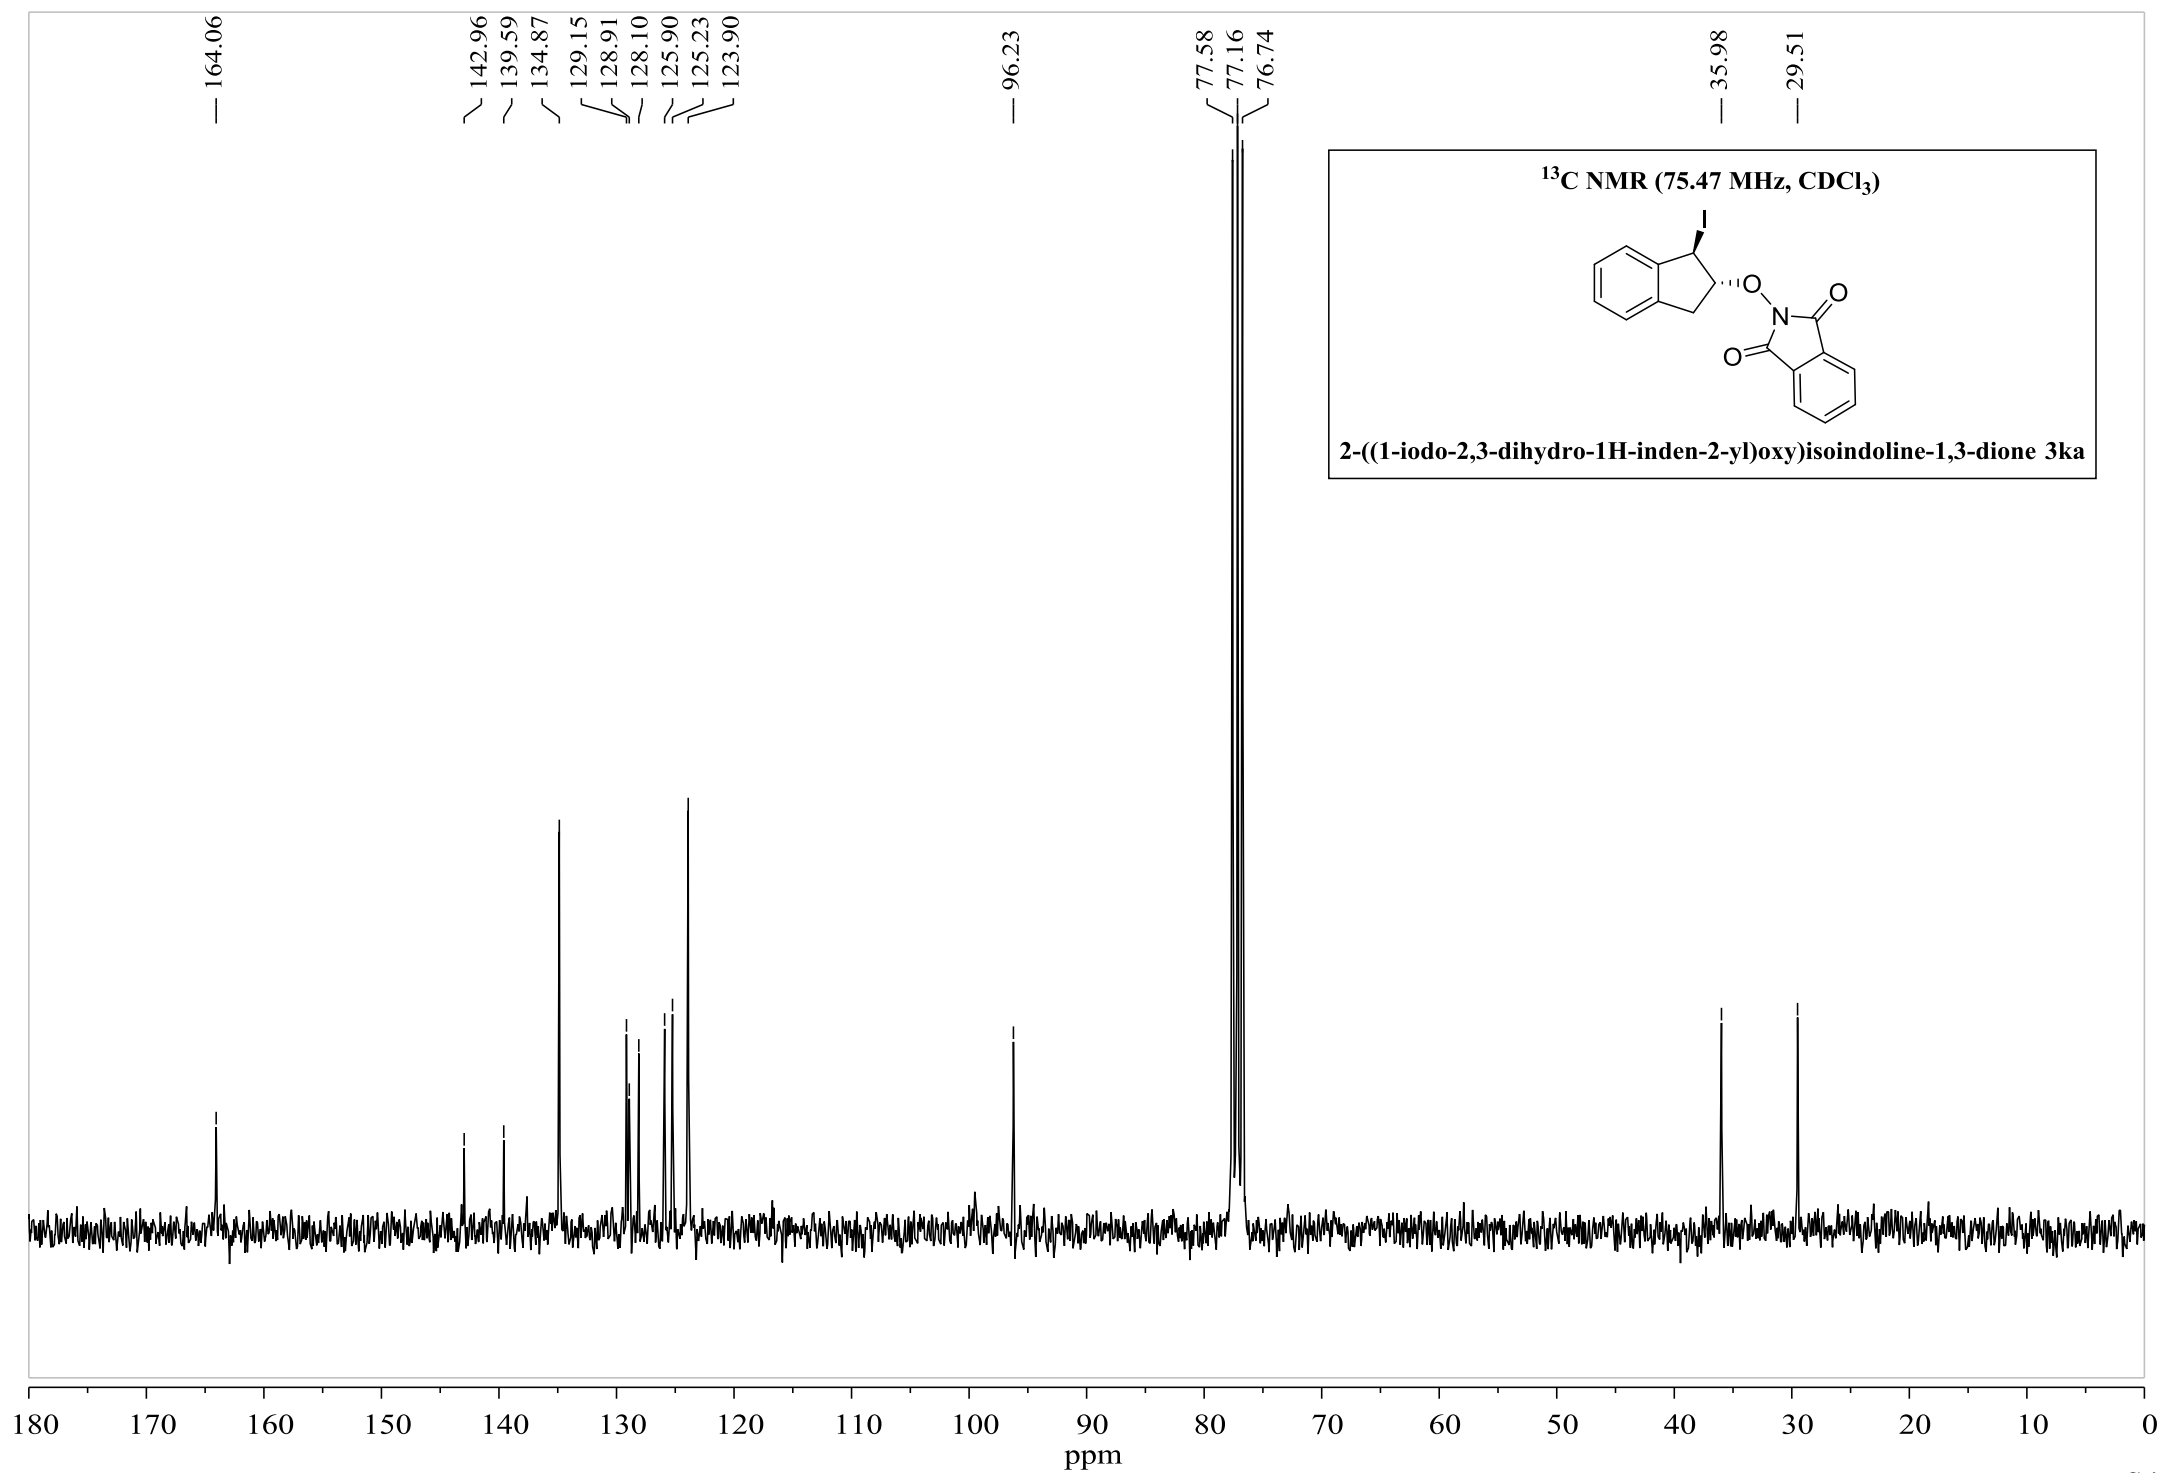

/TERN i3447

i3447 CDCl3 nmr 1H-15N HMBC Te298K

{<sup>1</sup>H-<sup>15</sup>N}HMBC NMR (400.16, 40.56 MHz, CDCl<sub>3</sub>)

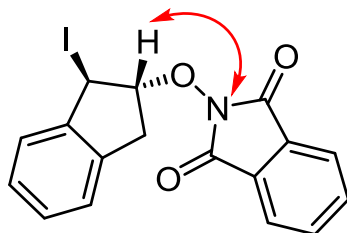

2-((1-iodo-2,3-dihydro-1H-inden-2-yl)oxy)isoindoline-1,3-dione 3ka

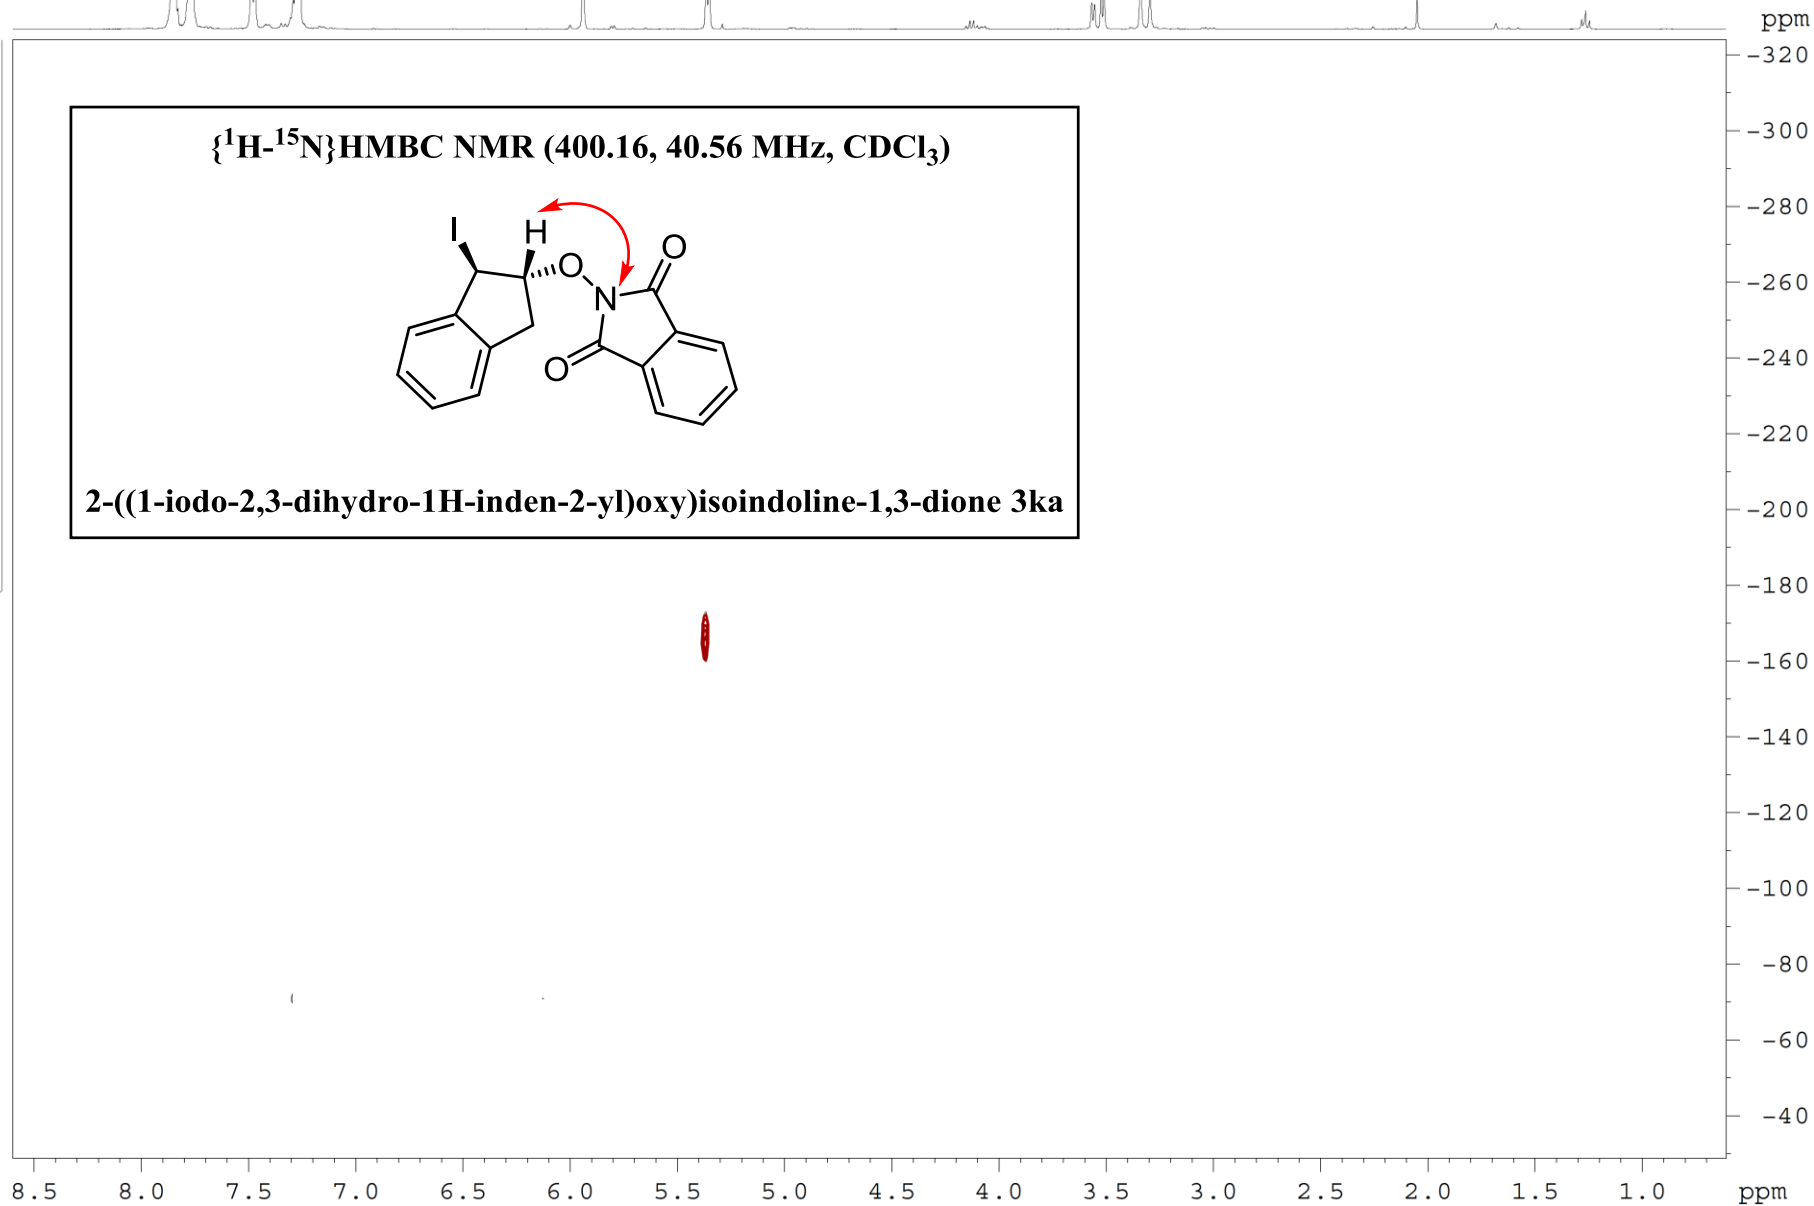

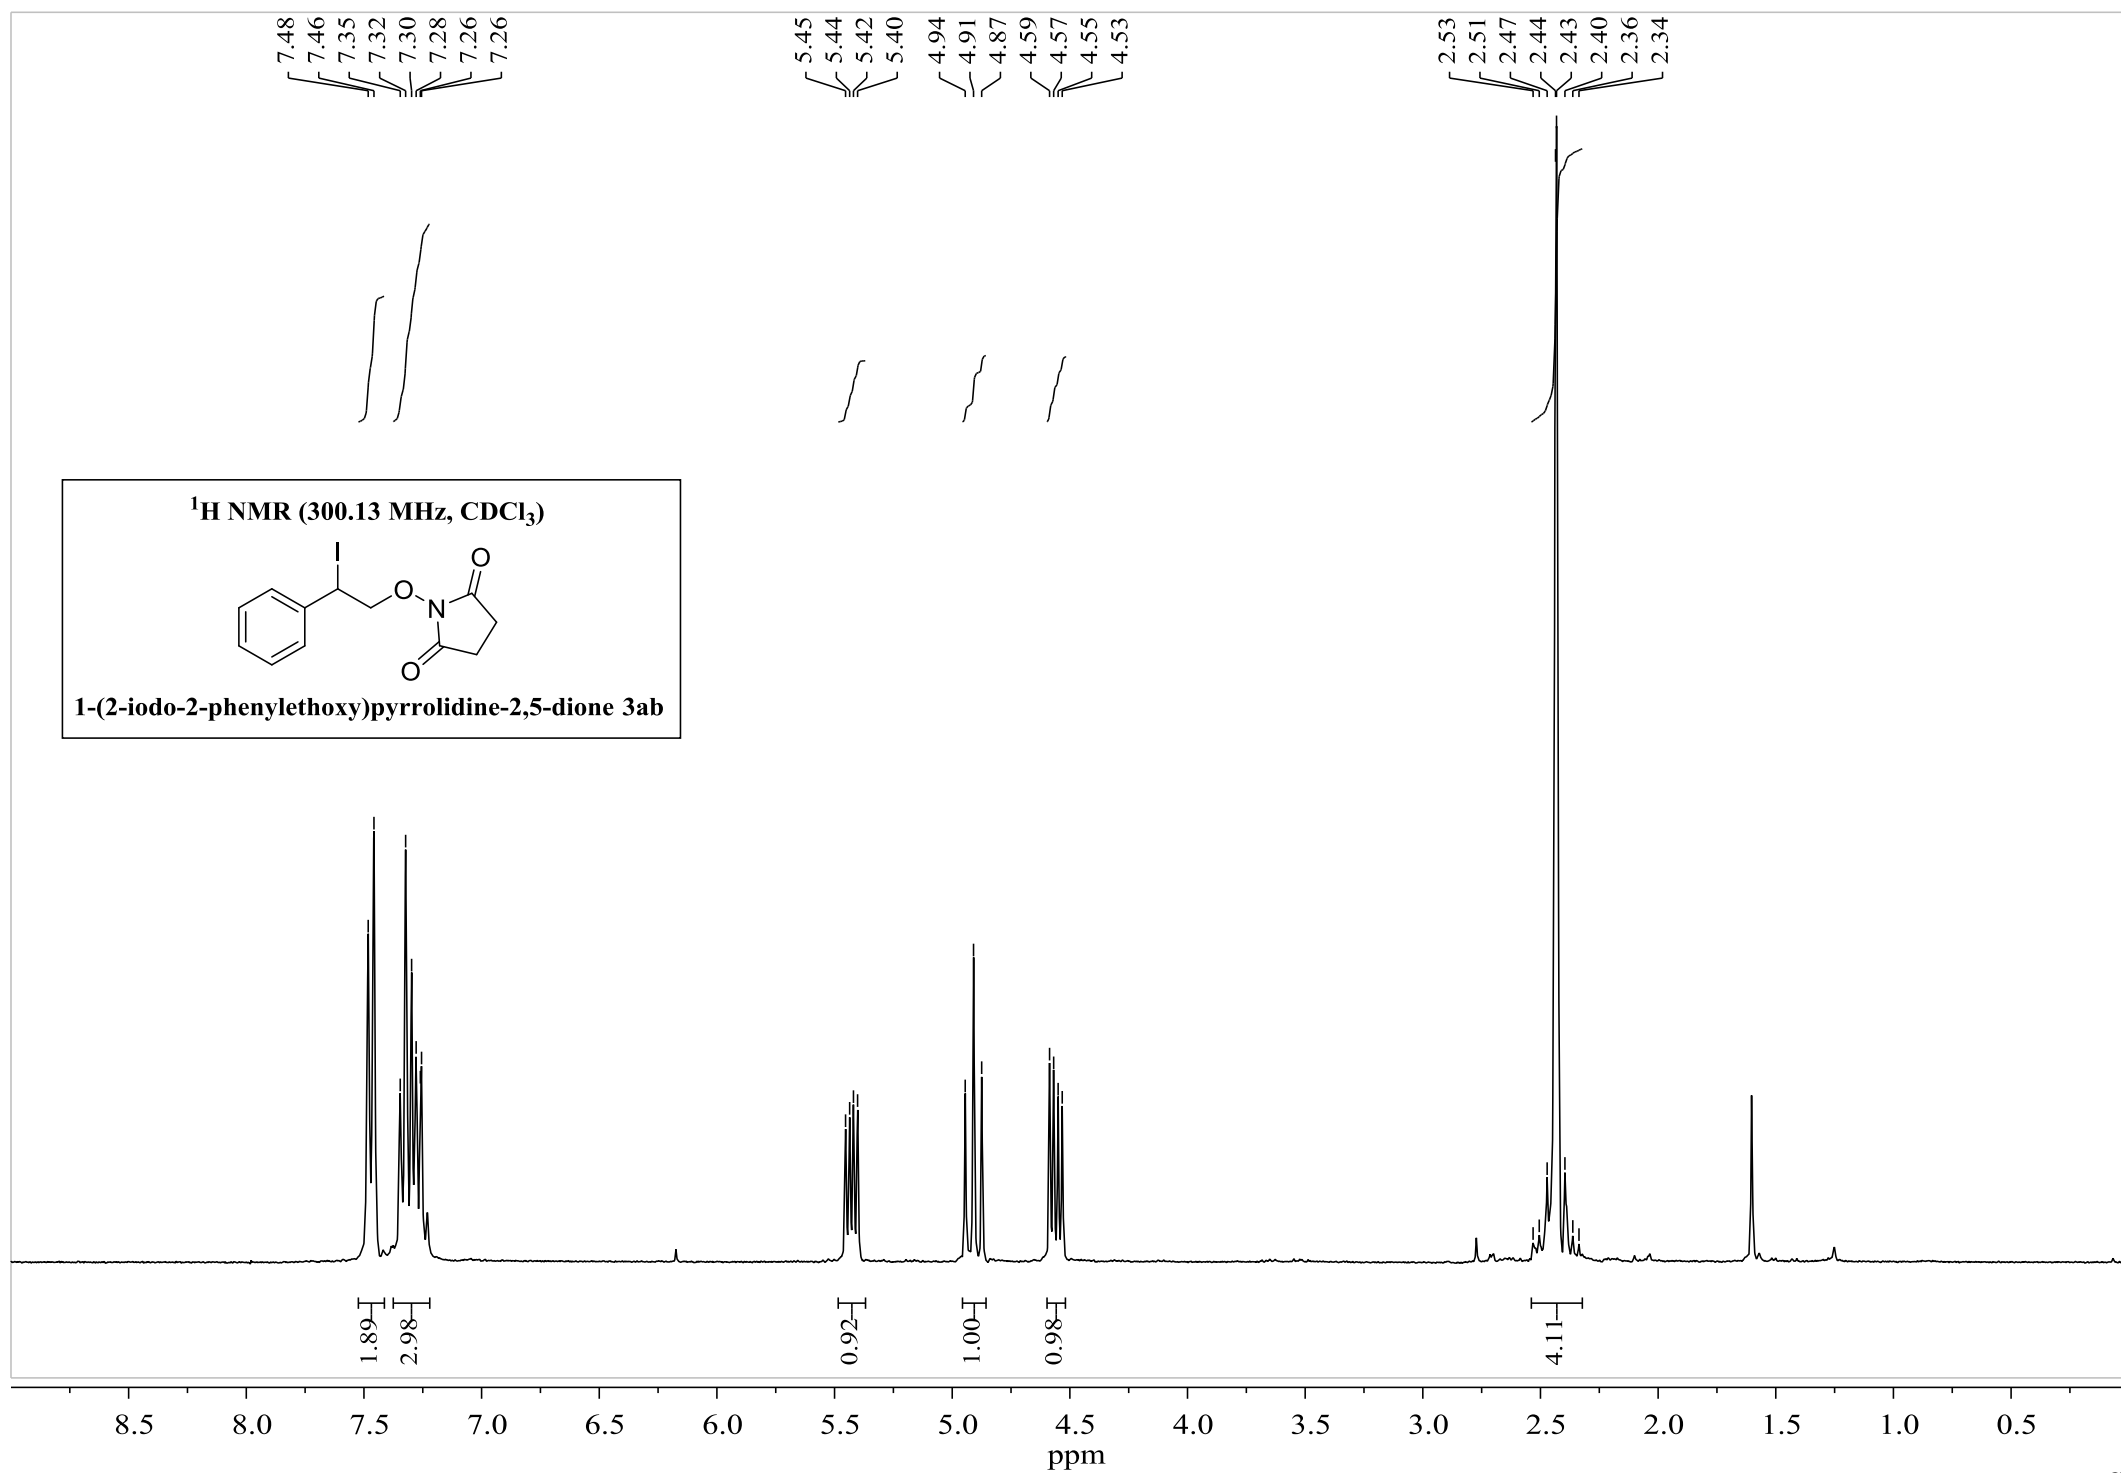

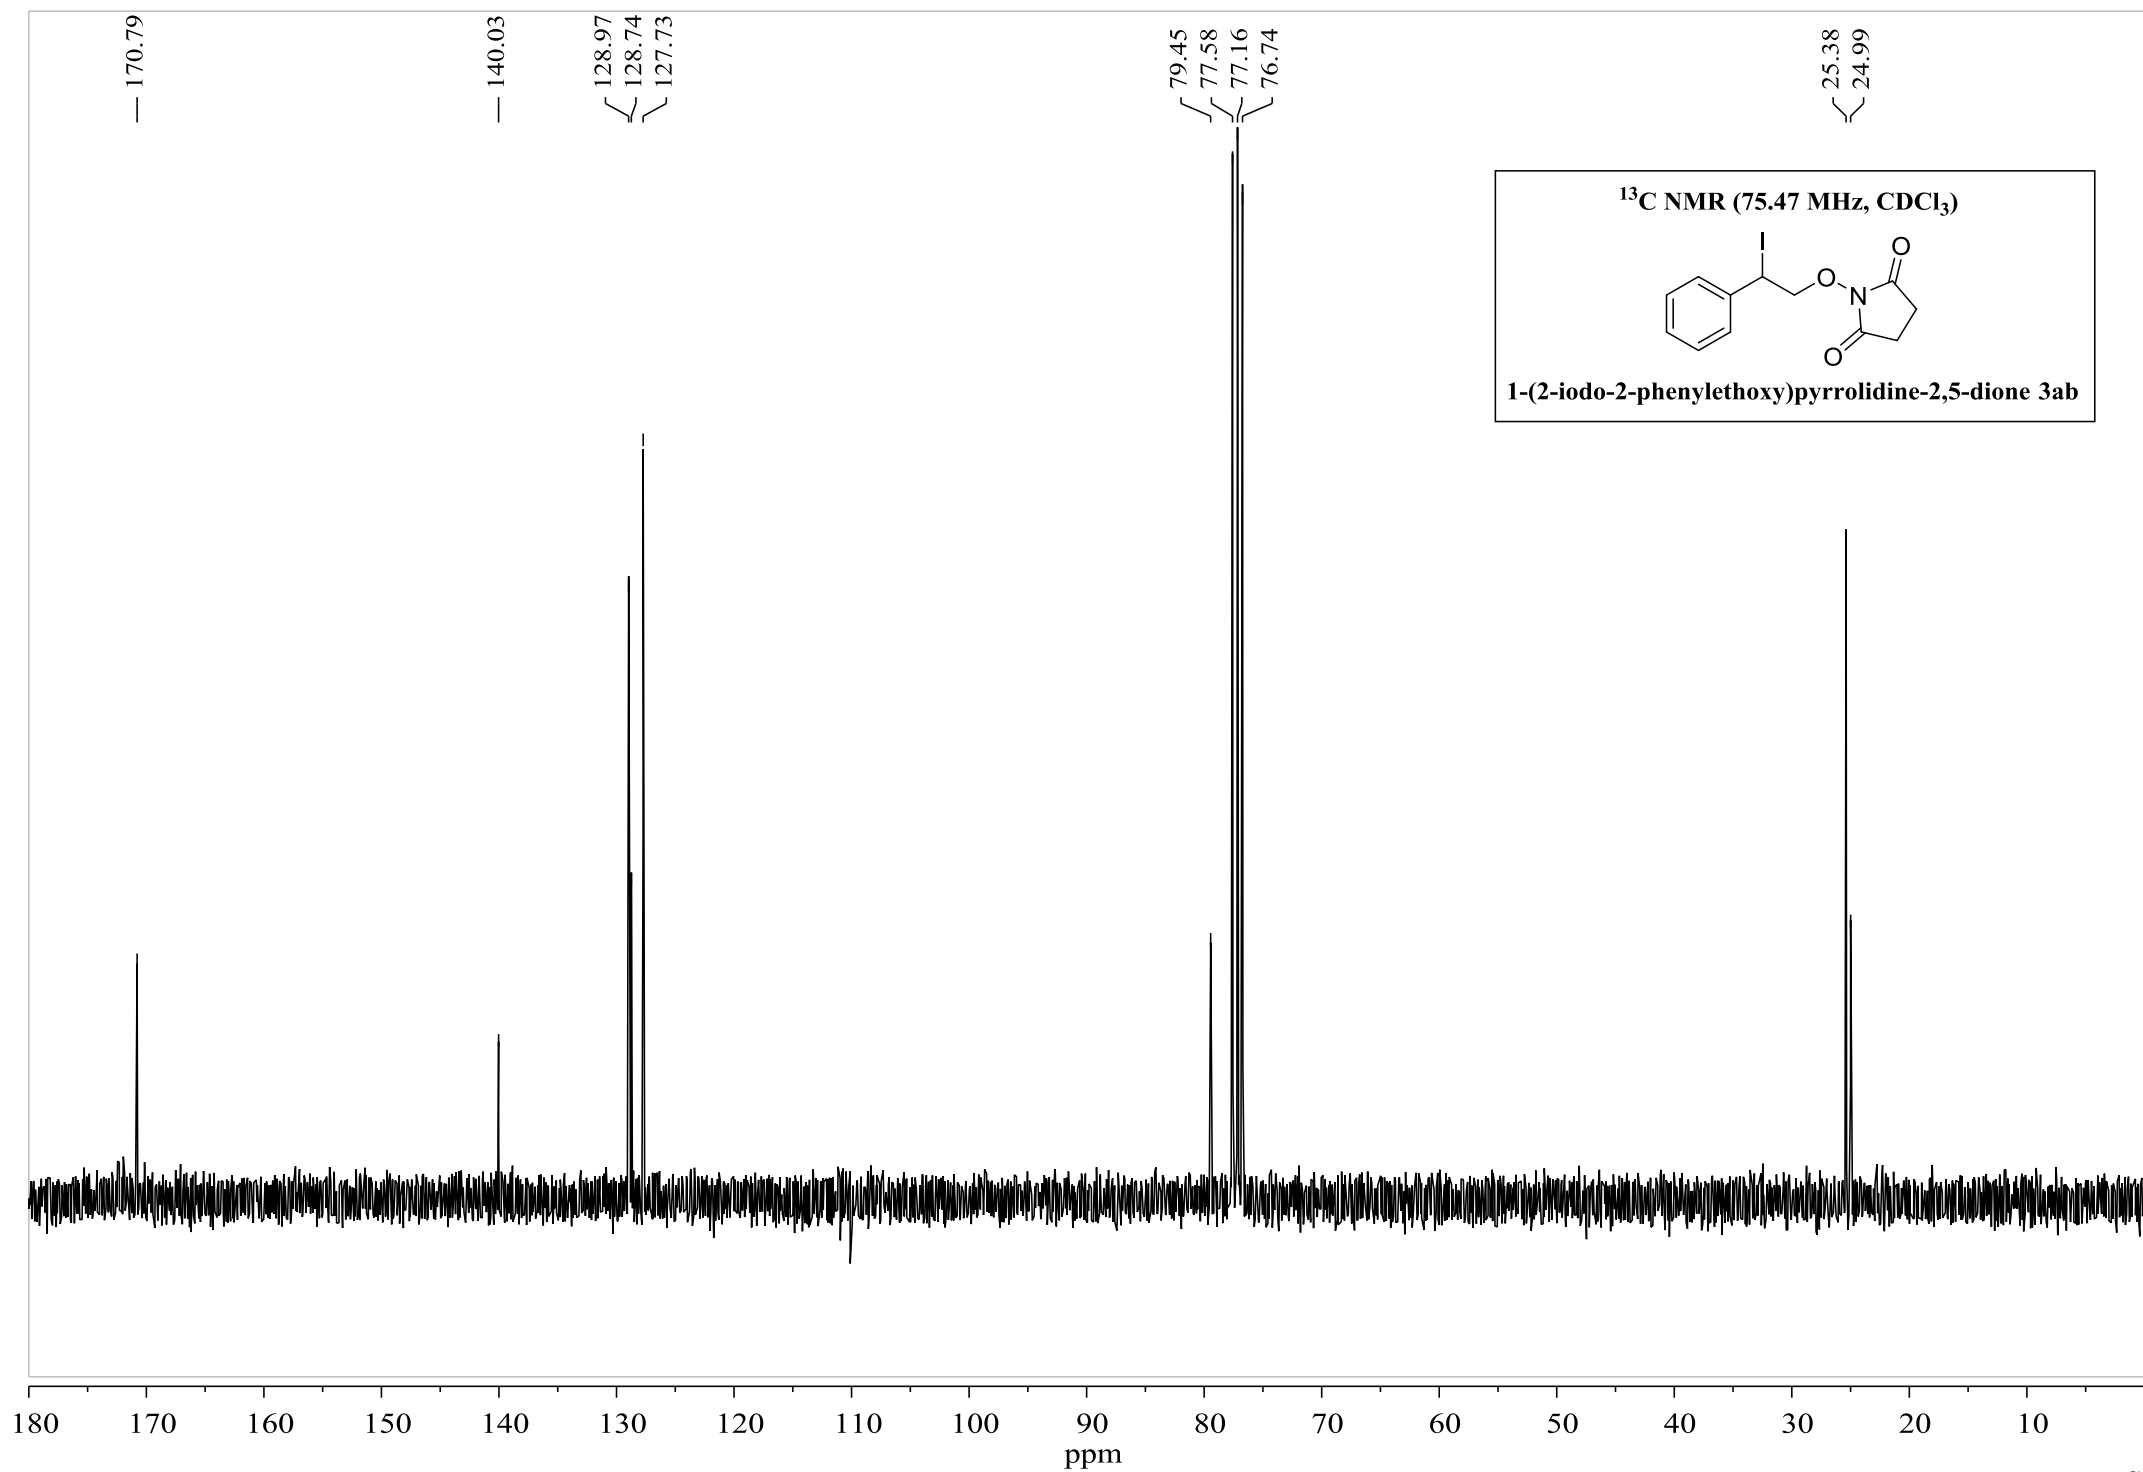



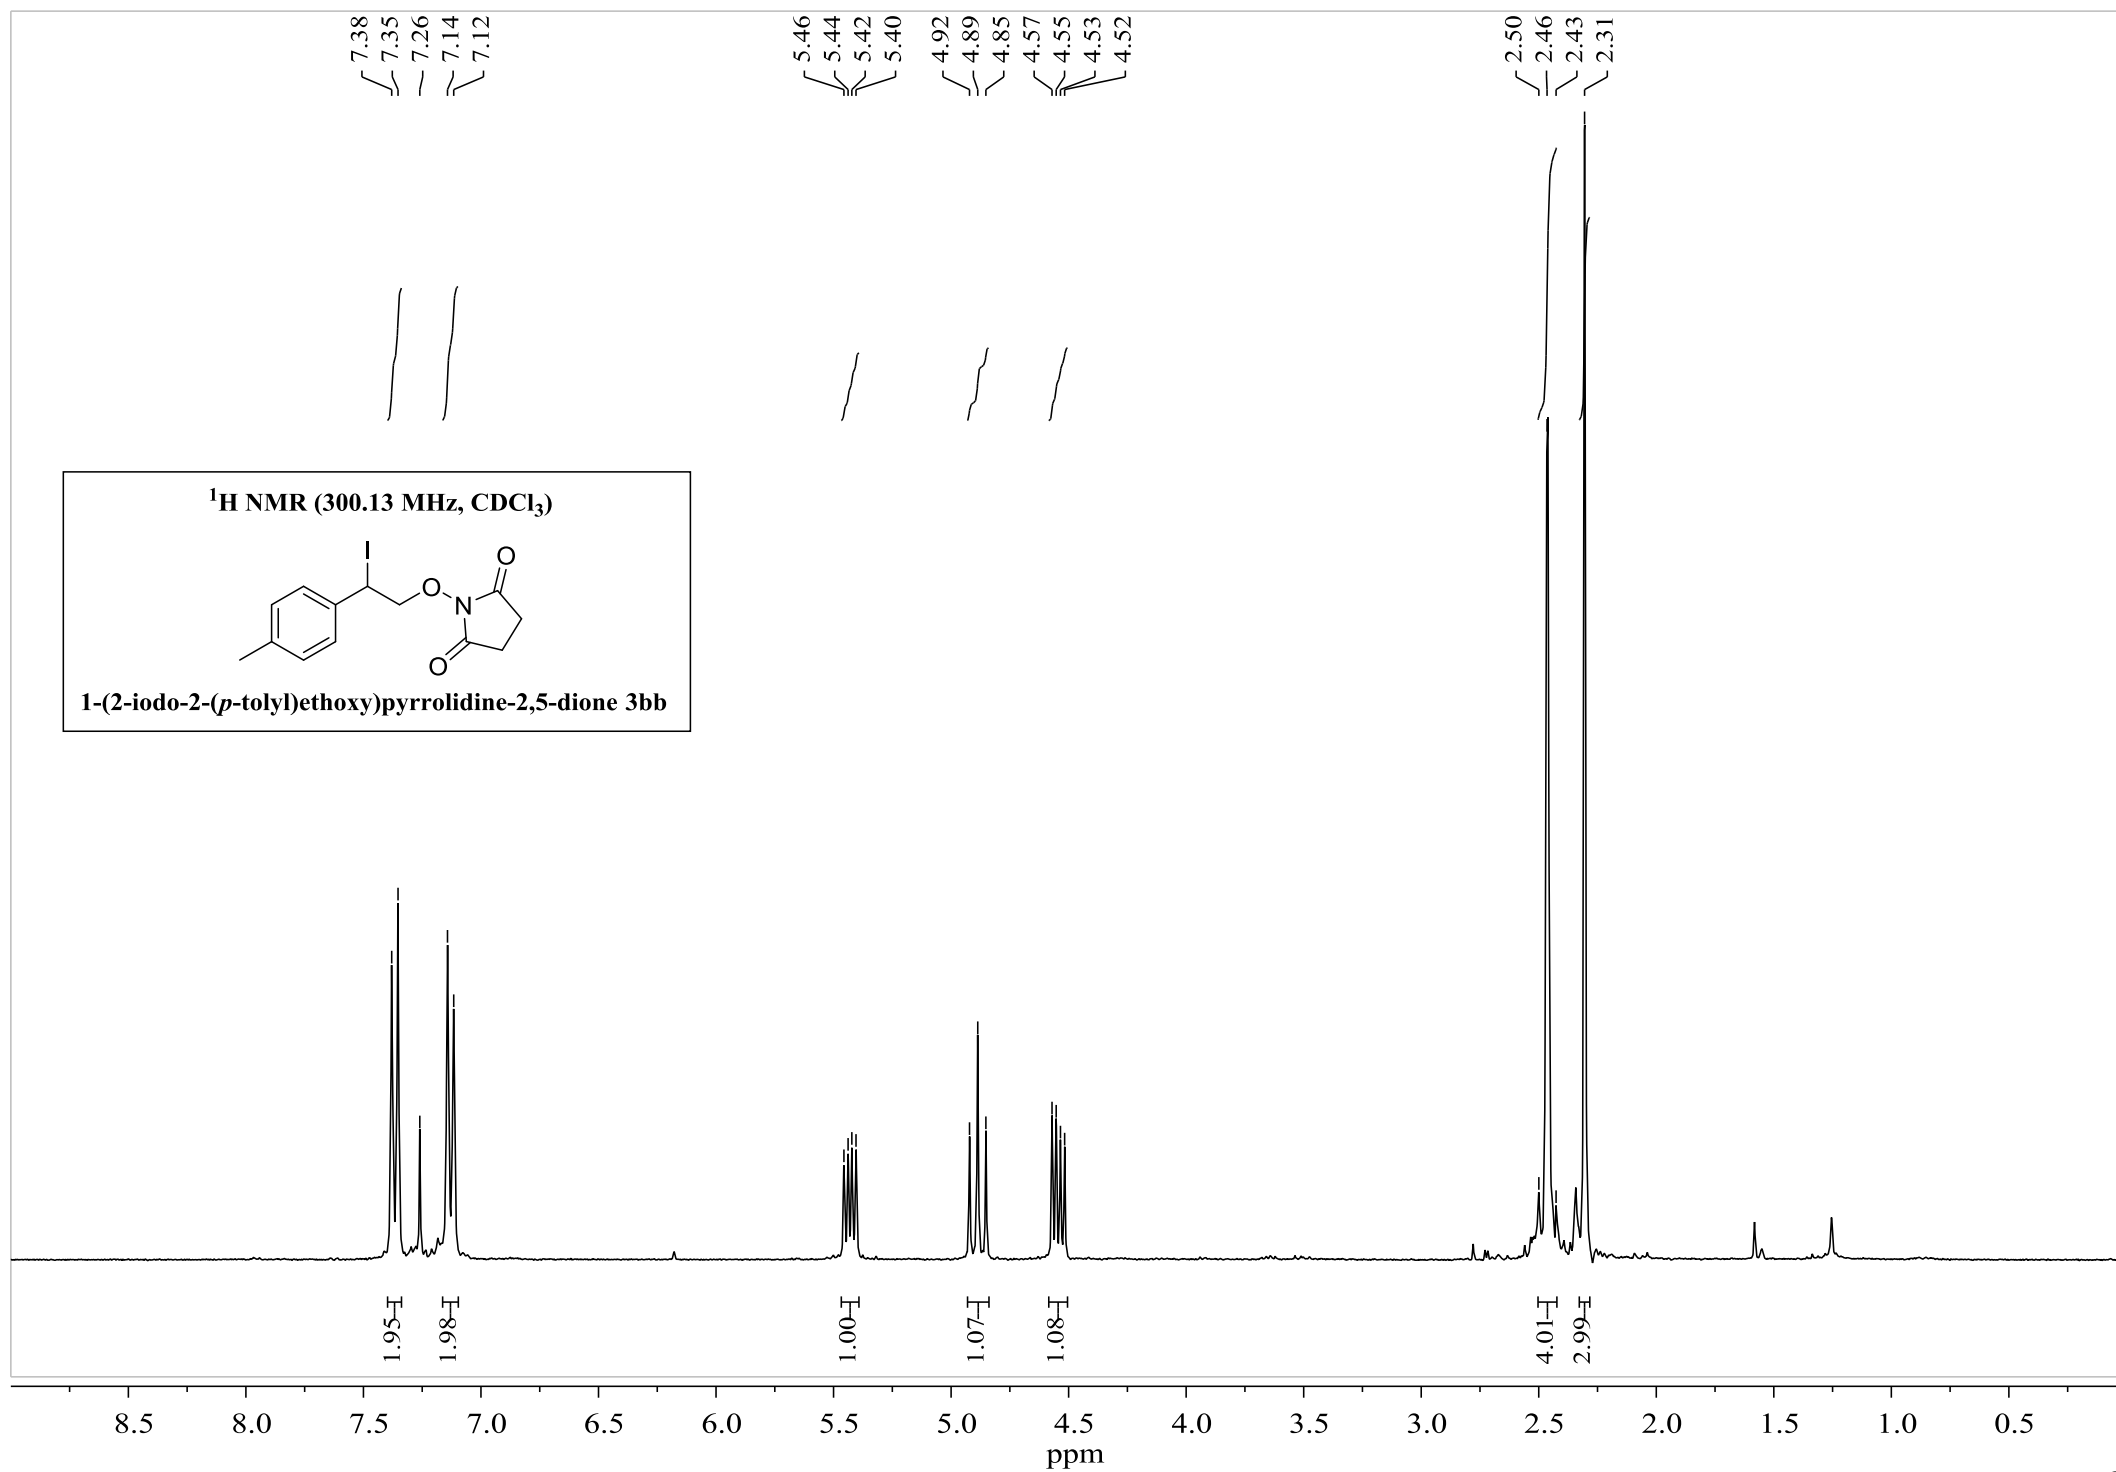

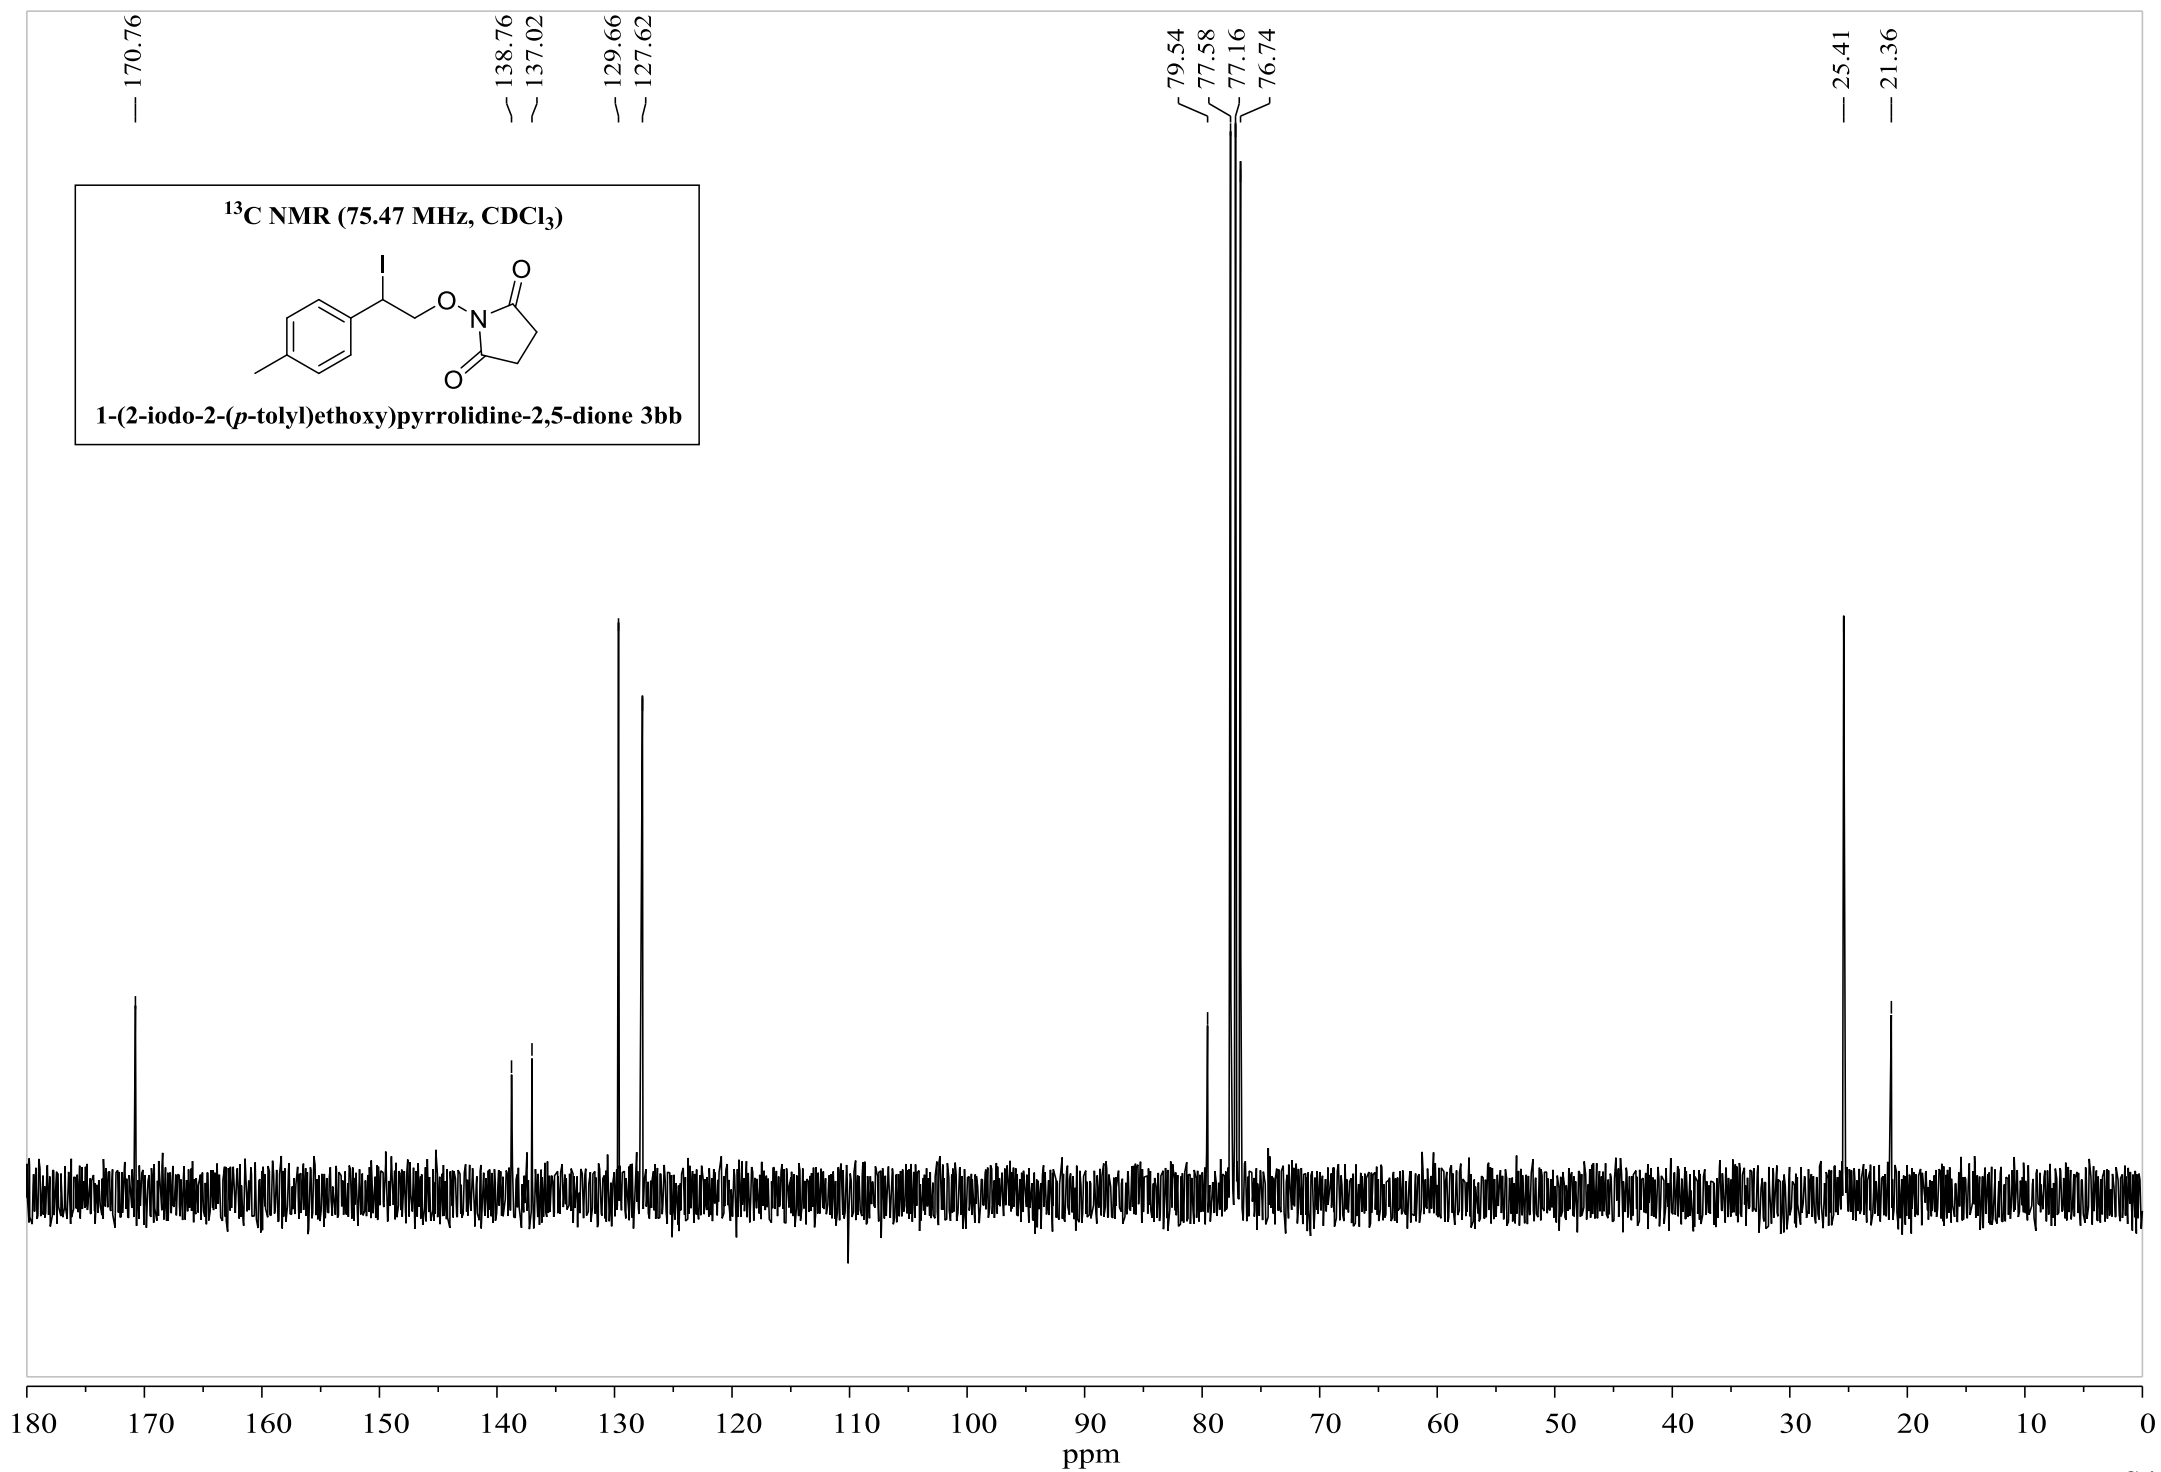

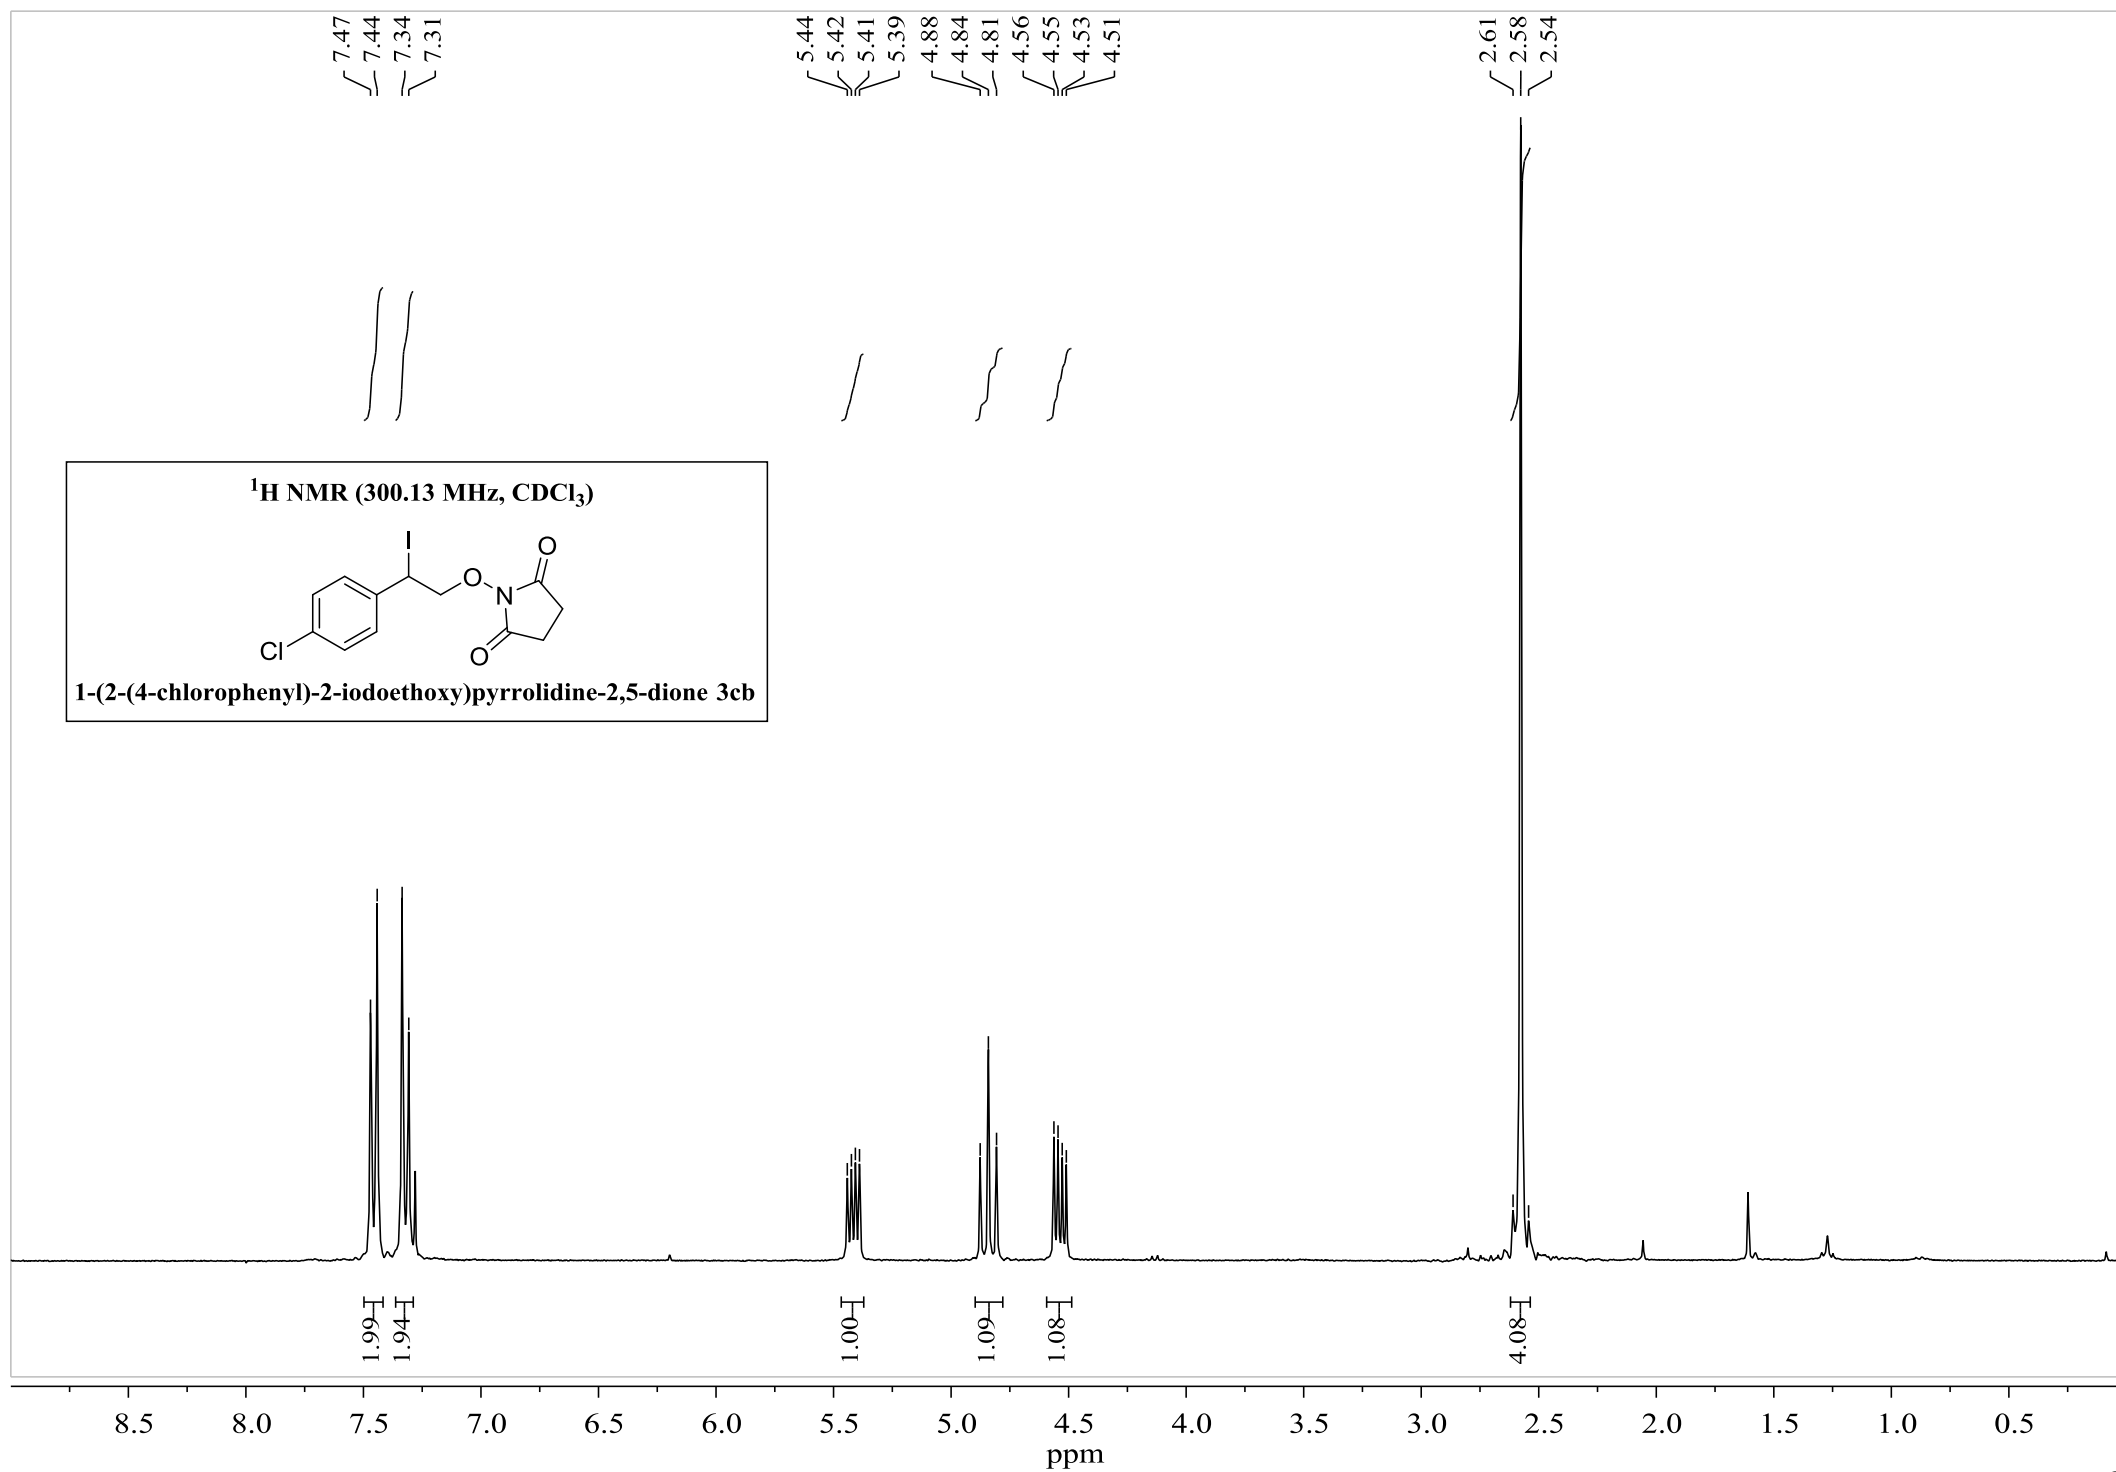

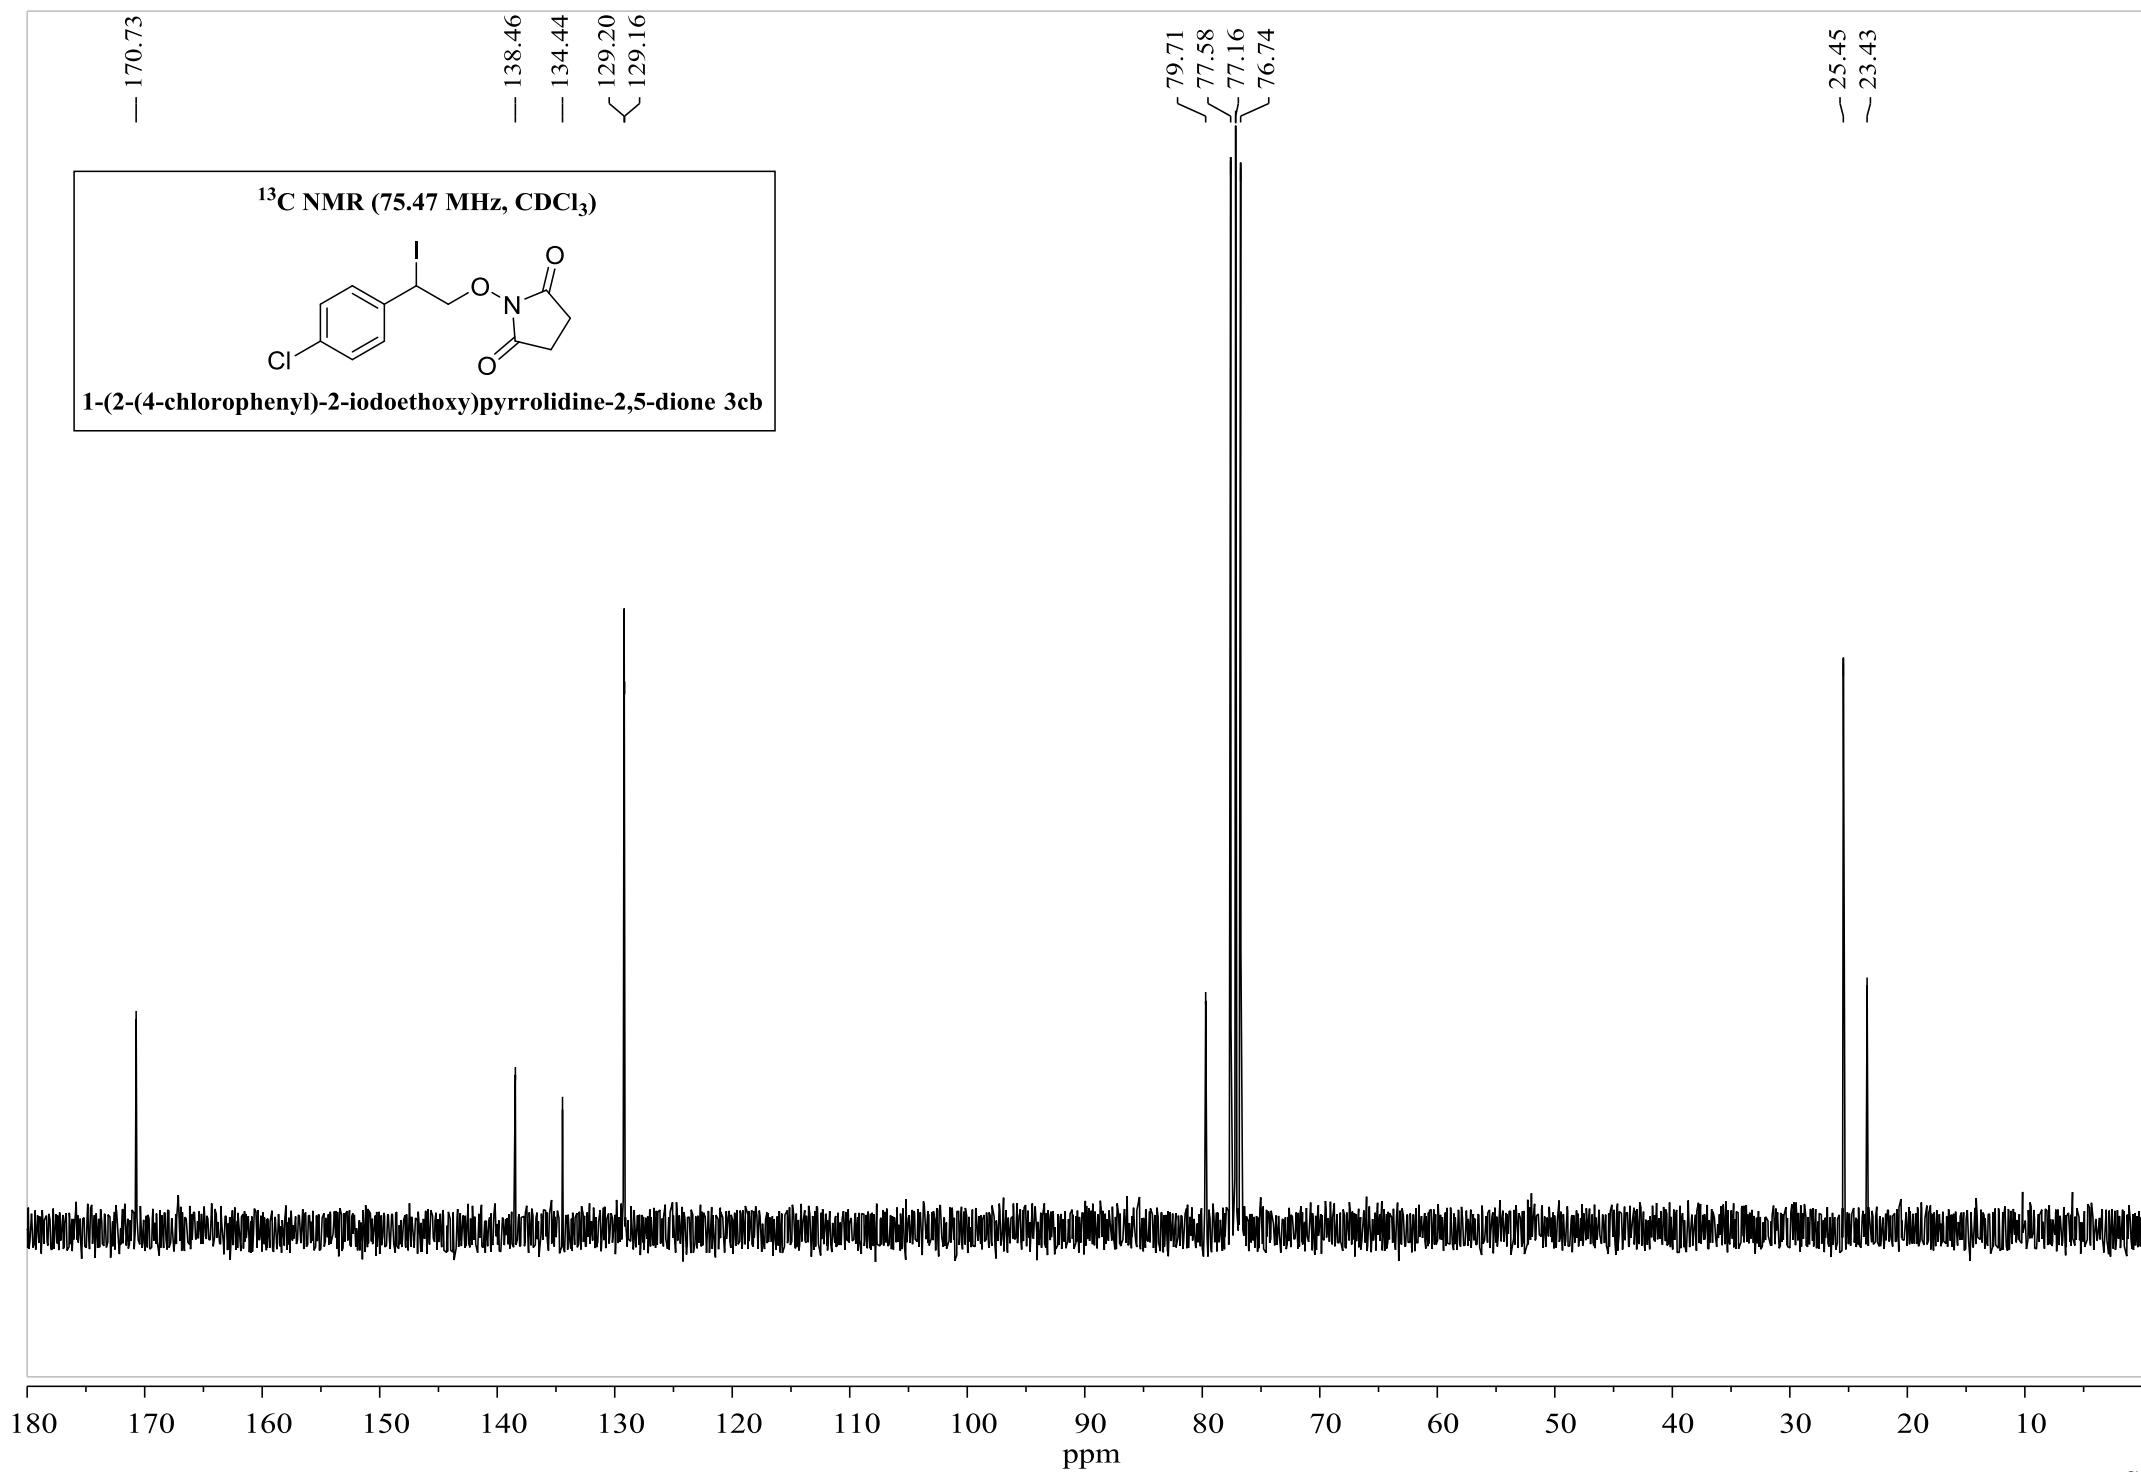

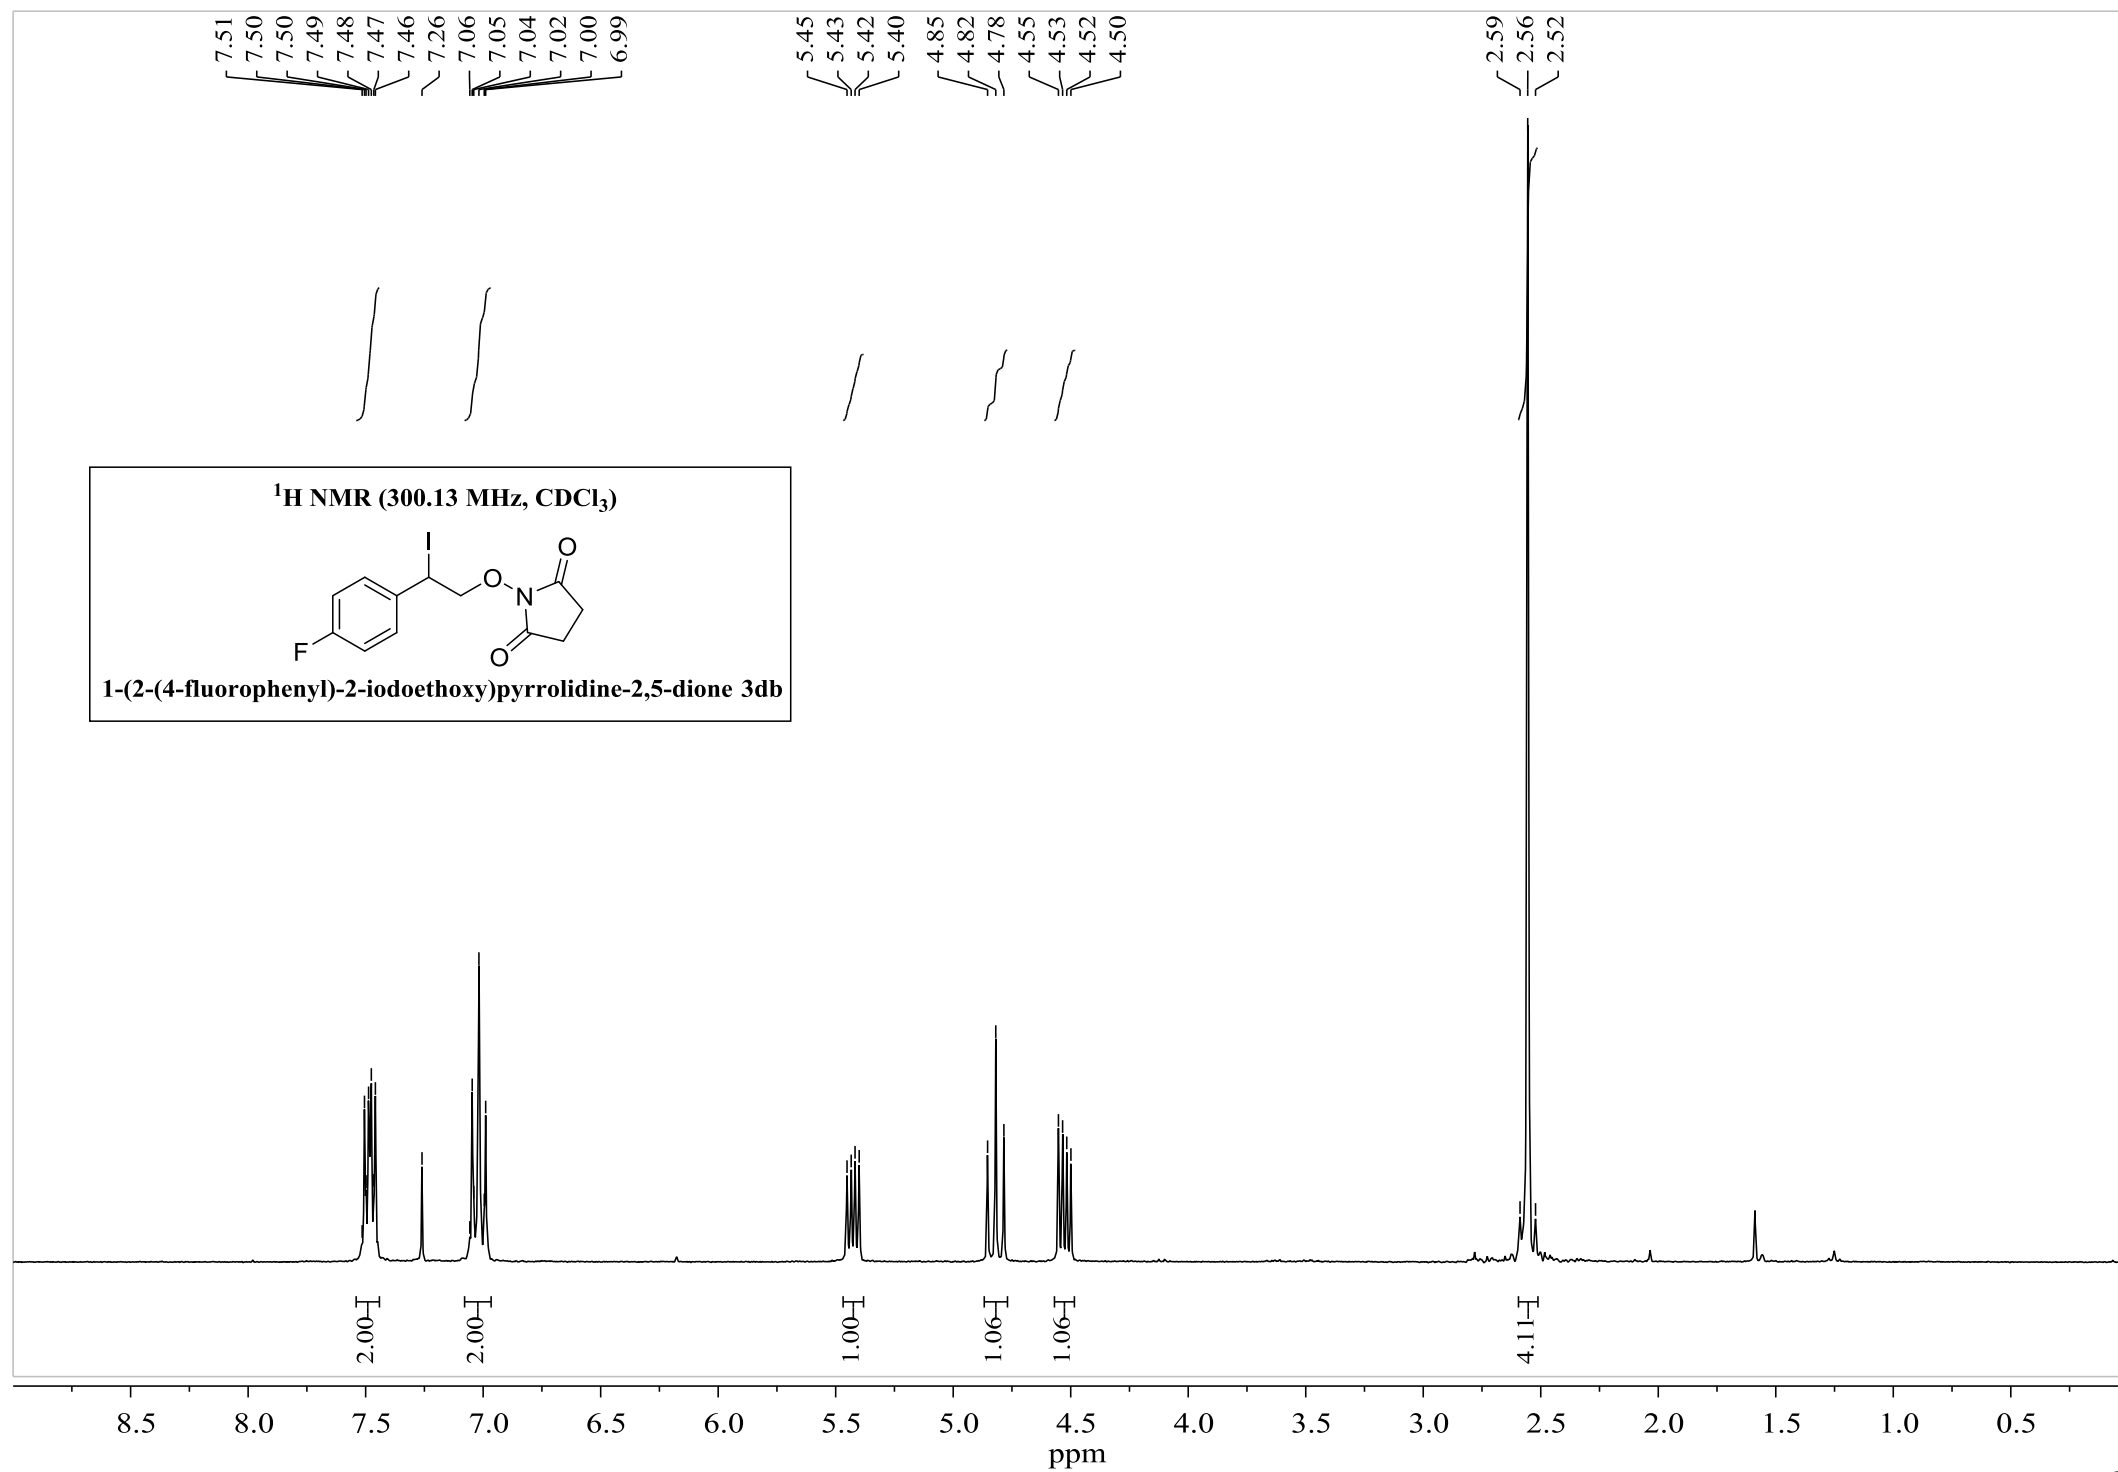

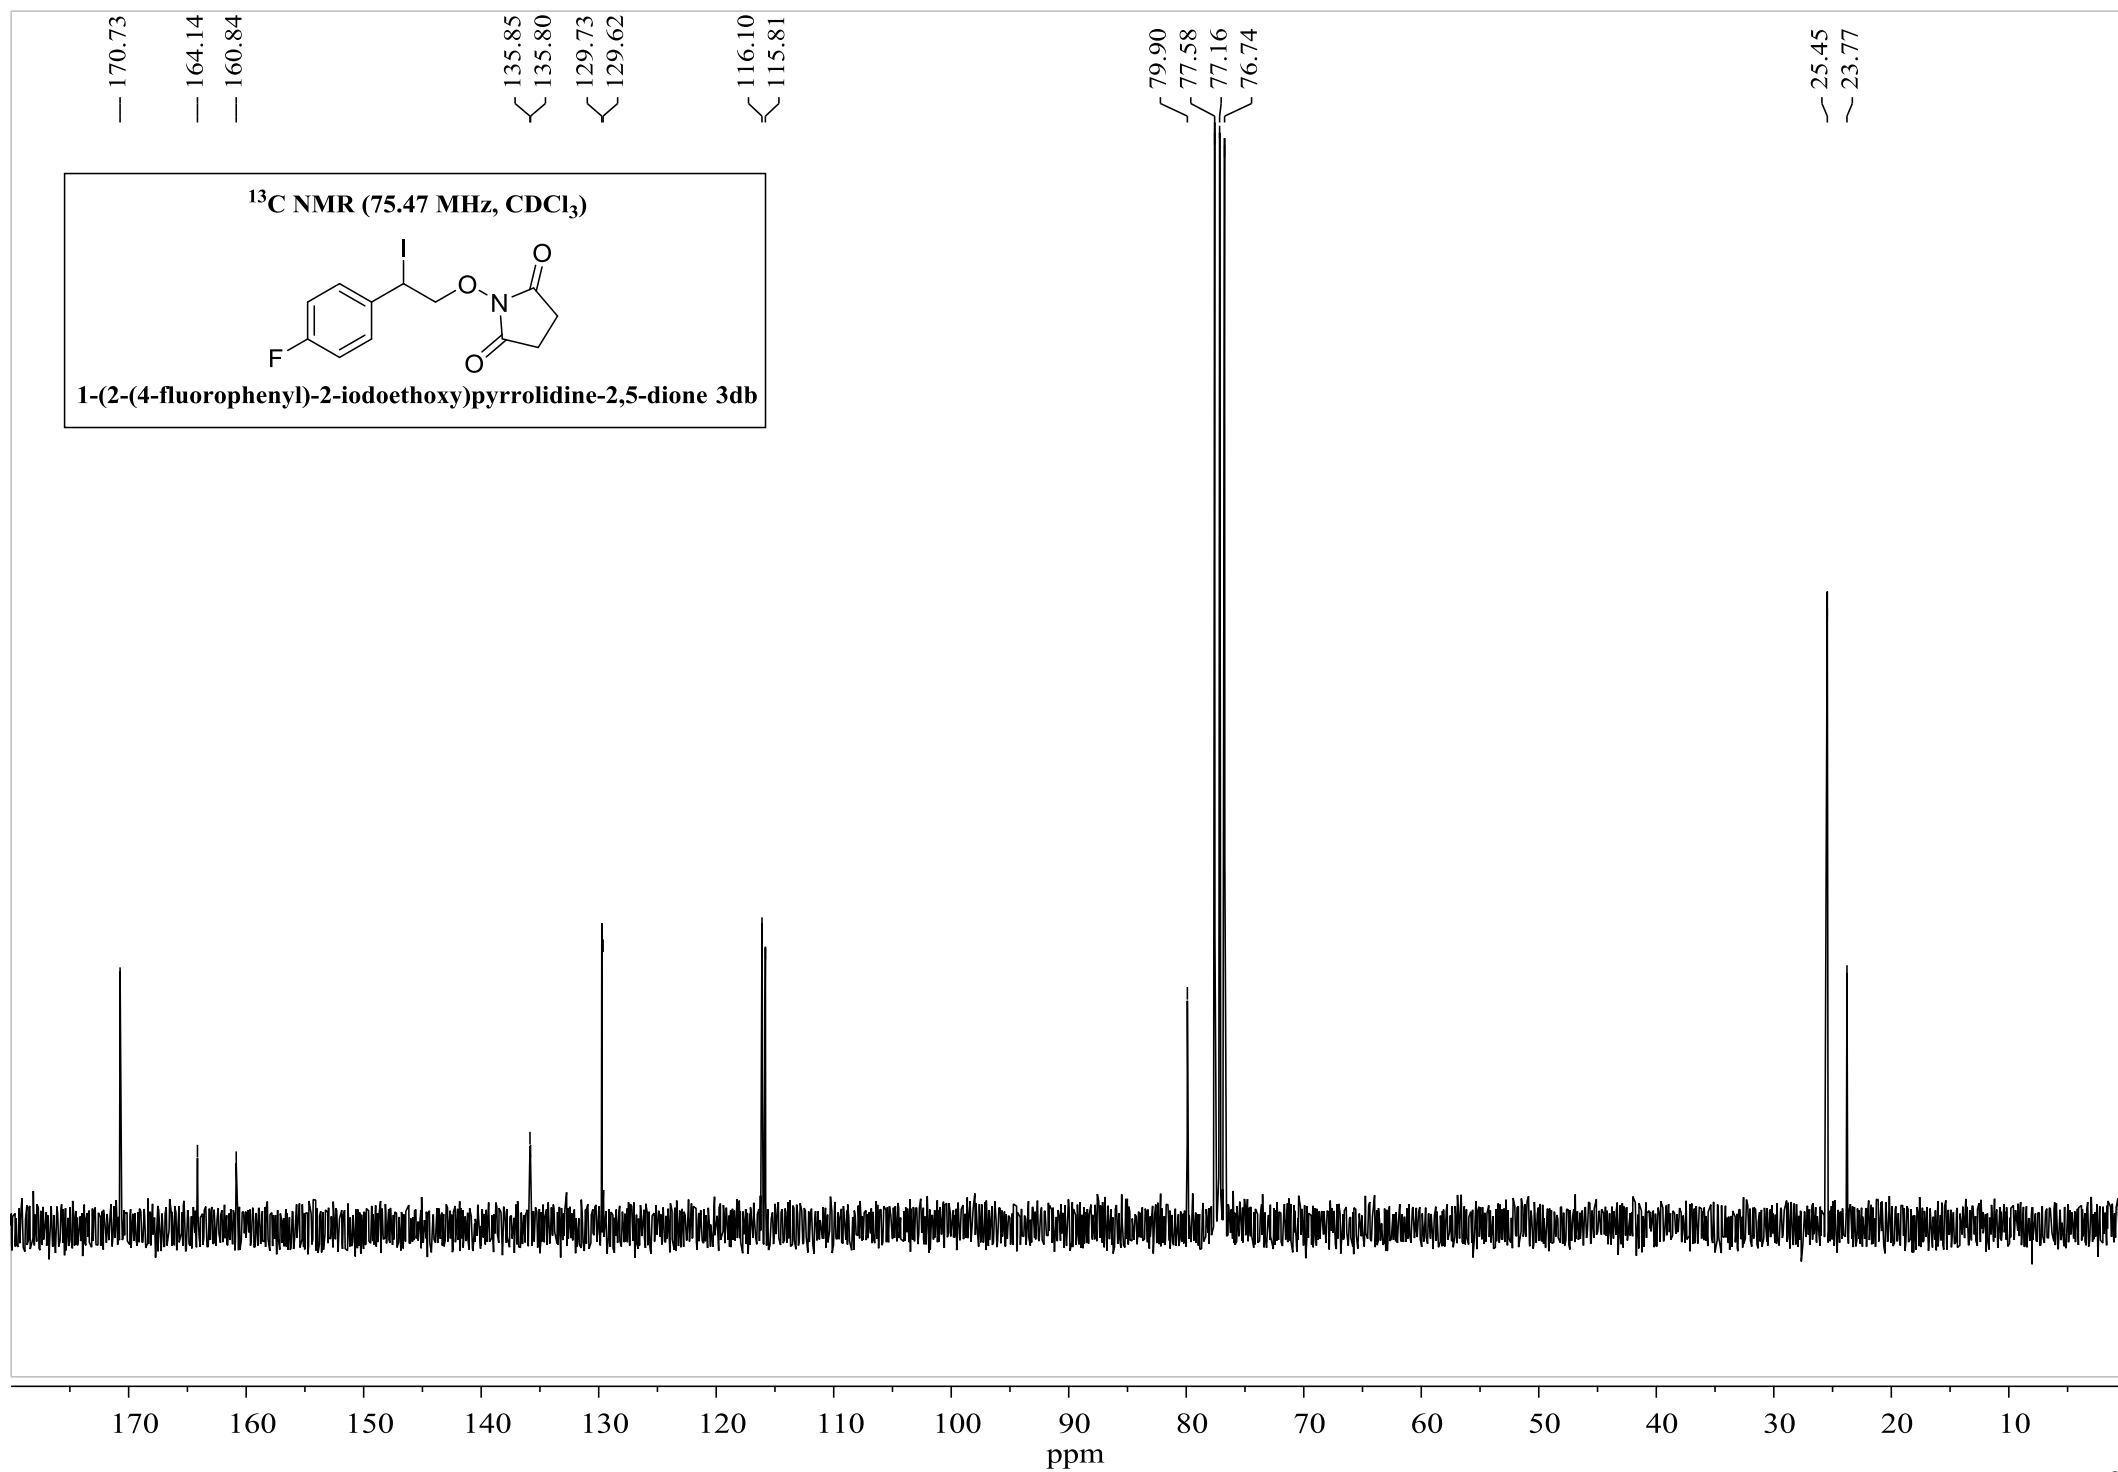

**$^{19}\text{F}$  NMR (282.40 MHz,  $\text{CDCl}_3$ )**

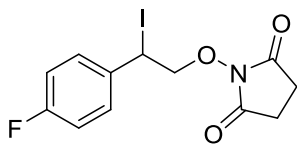

**1-(2-(4-fluorophenyl)-2-iodoethoxy)pyrrolidine-2,5-dione 3db**

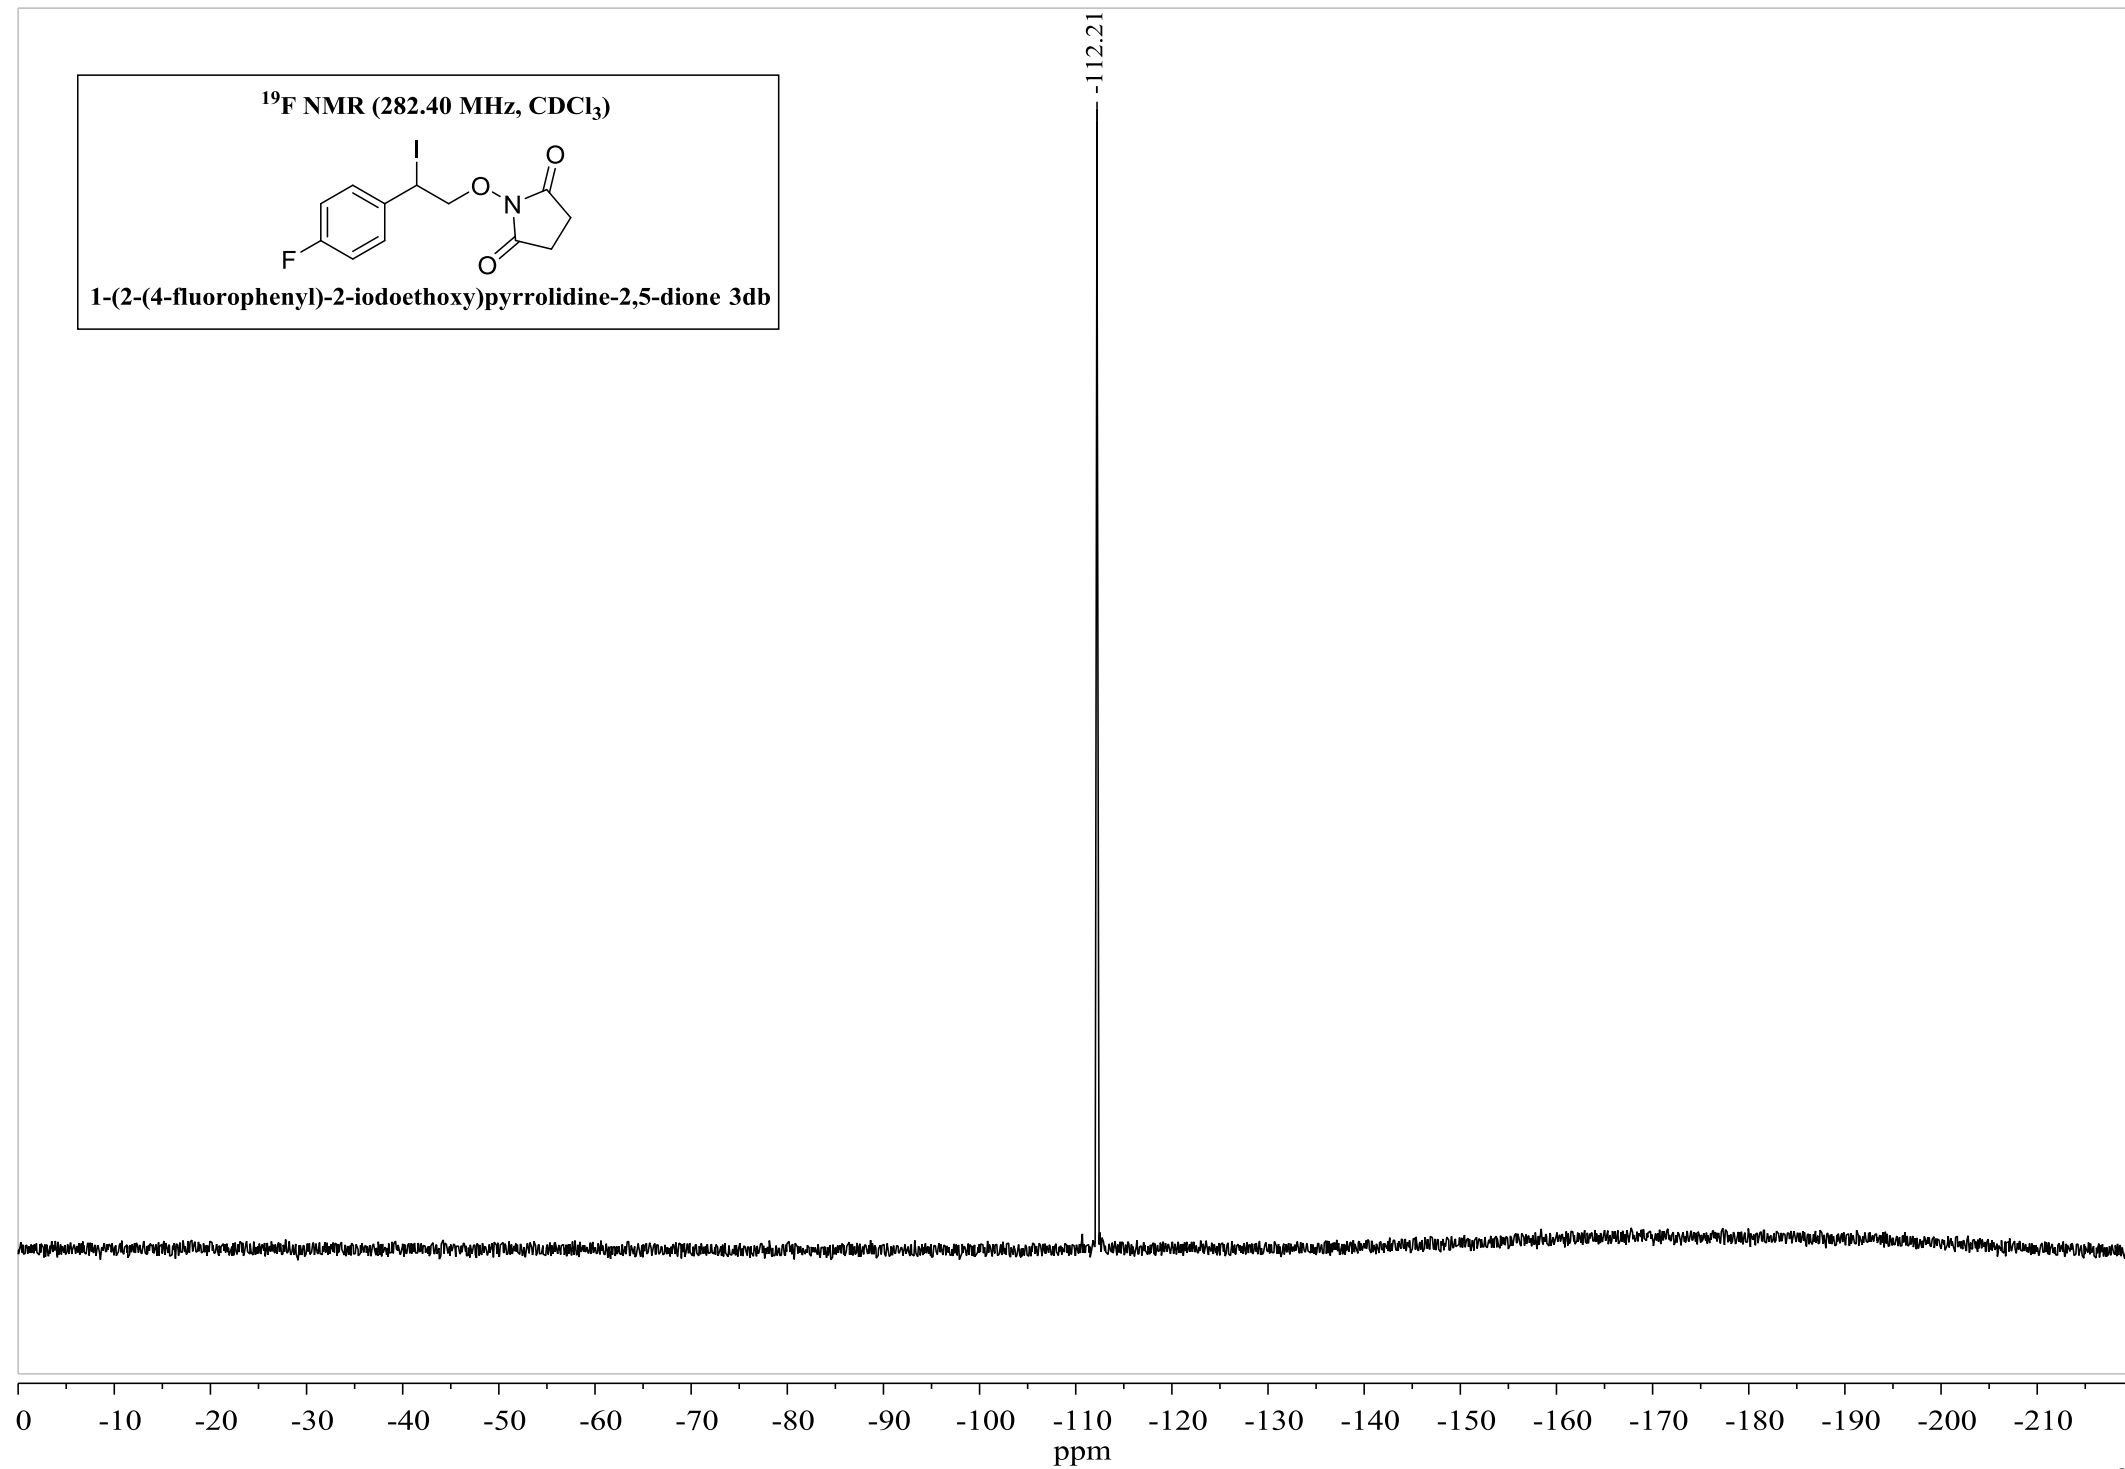

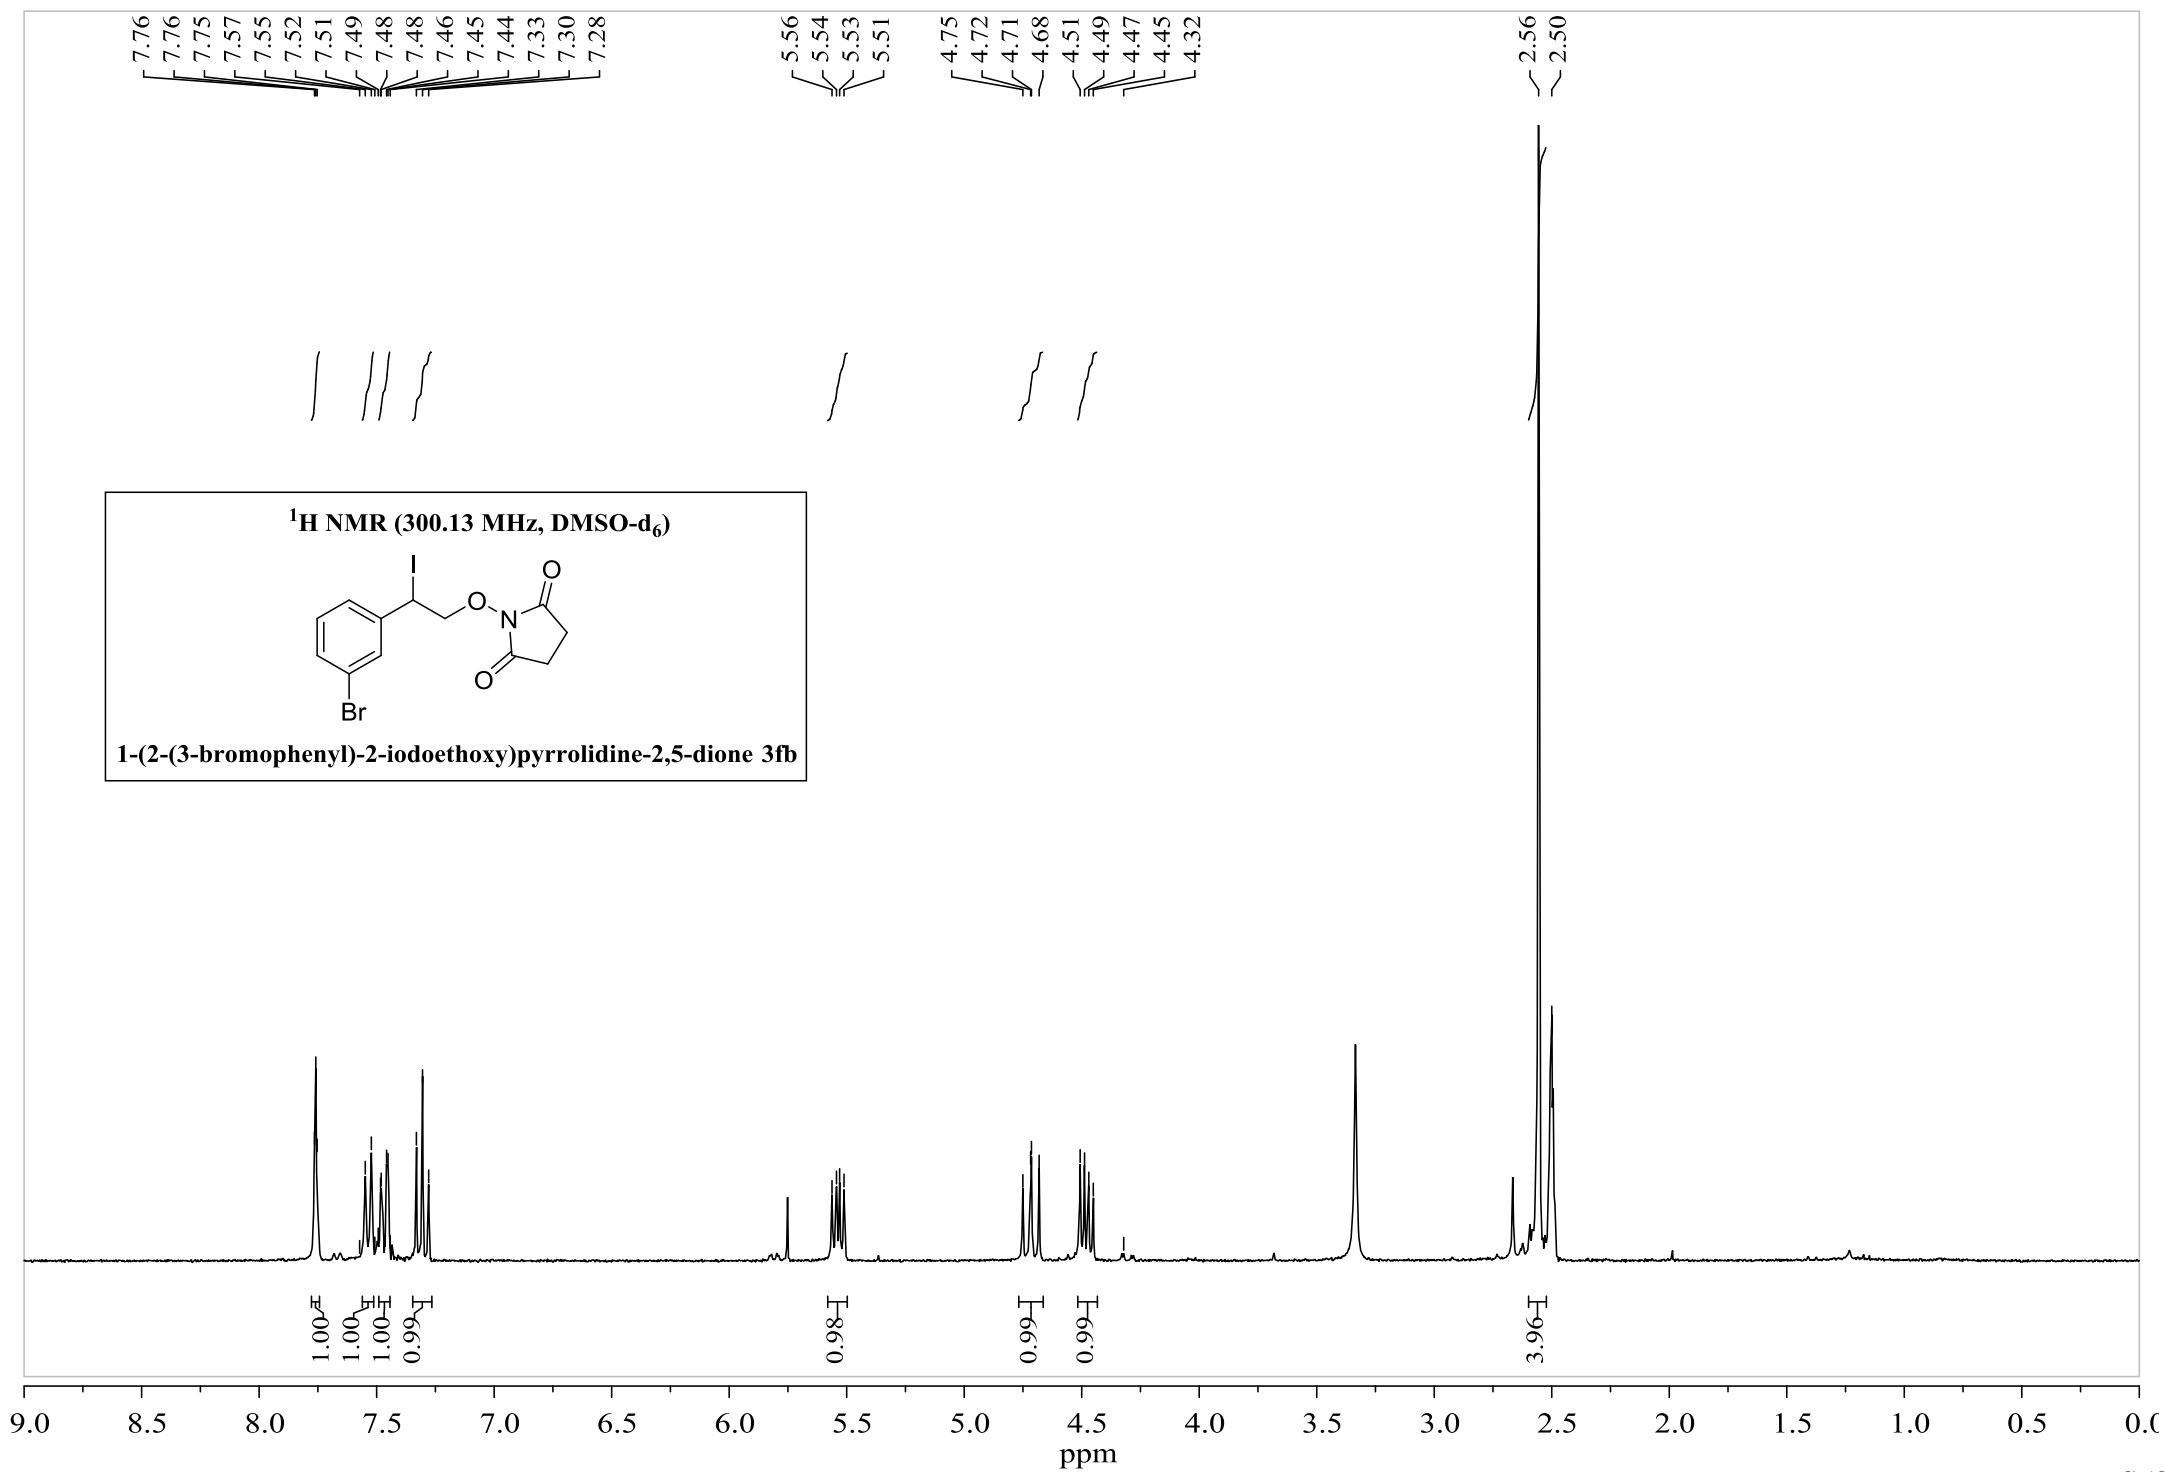



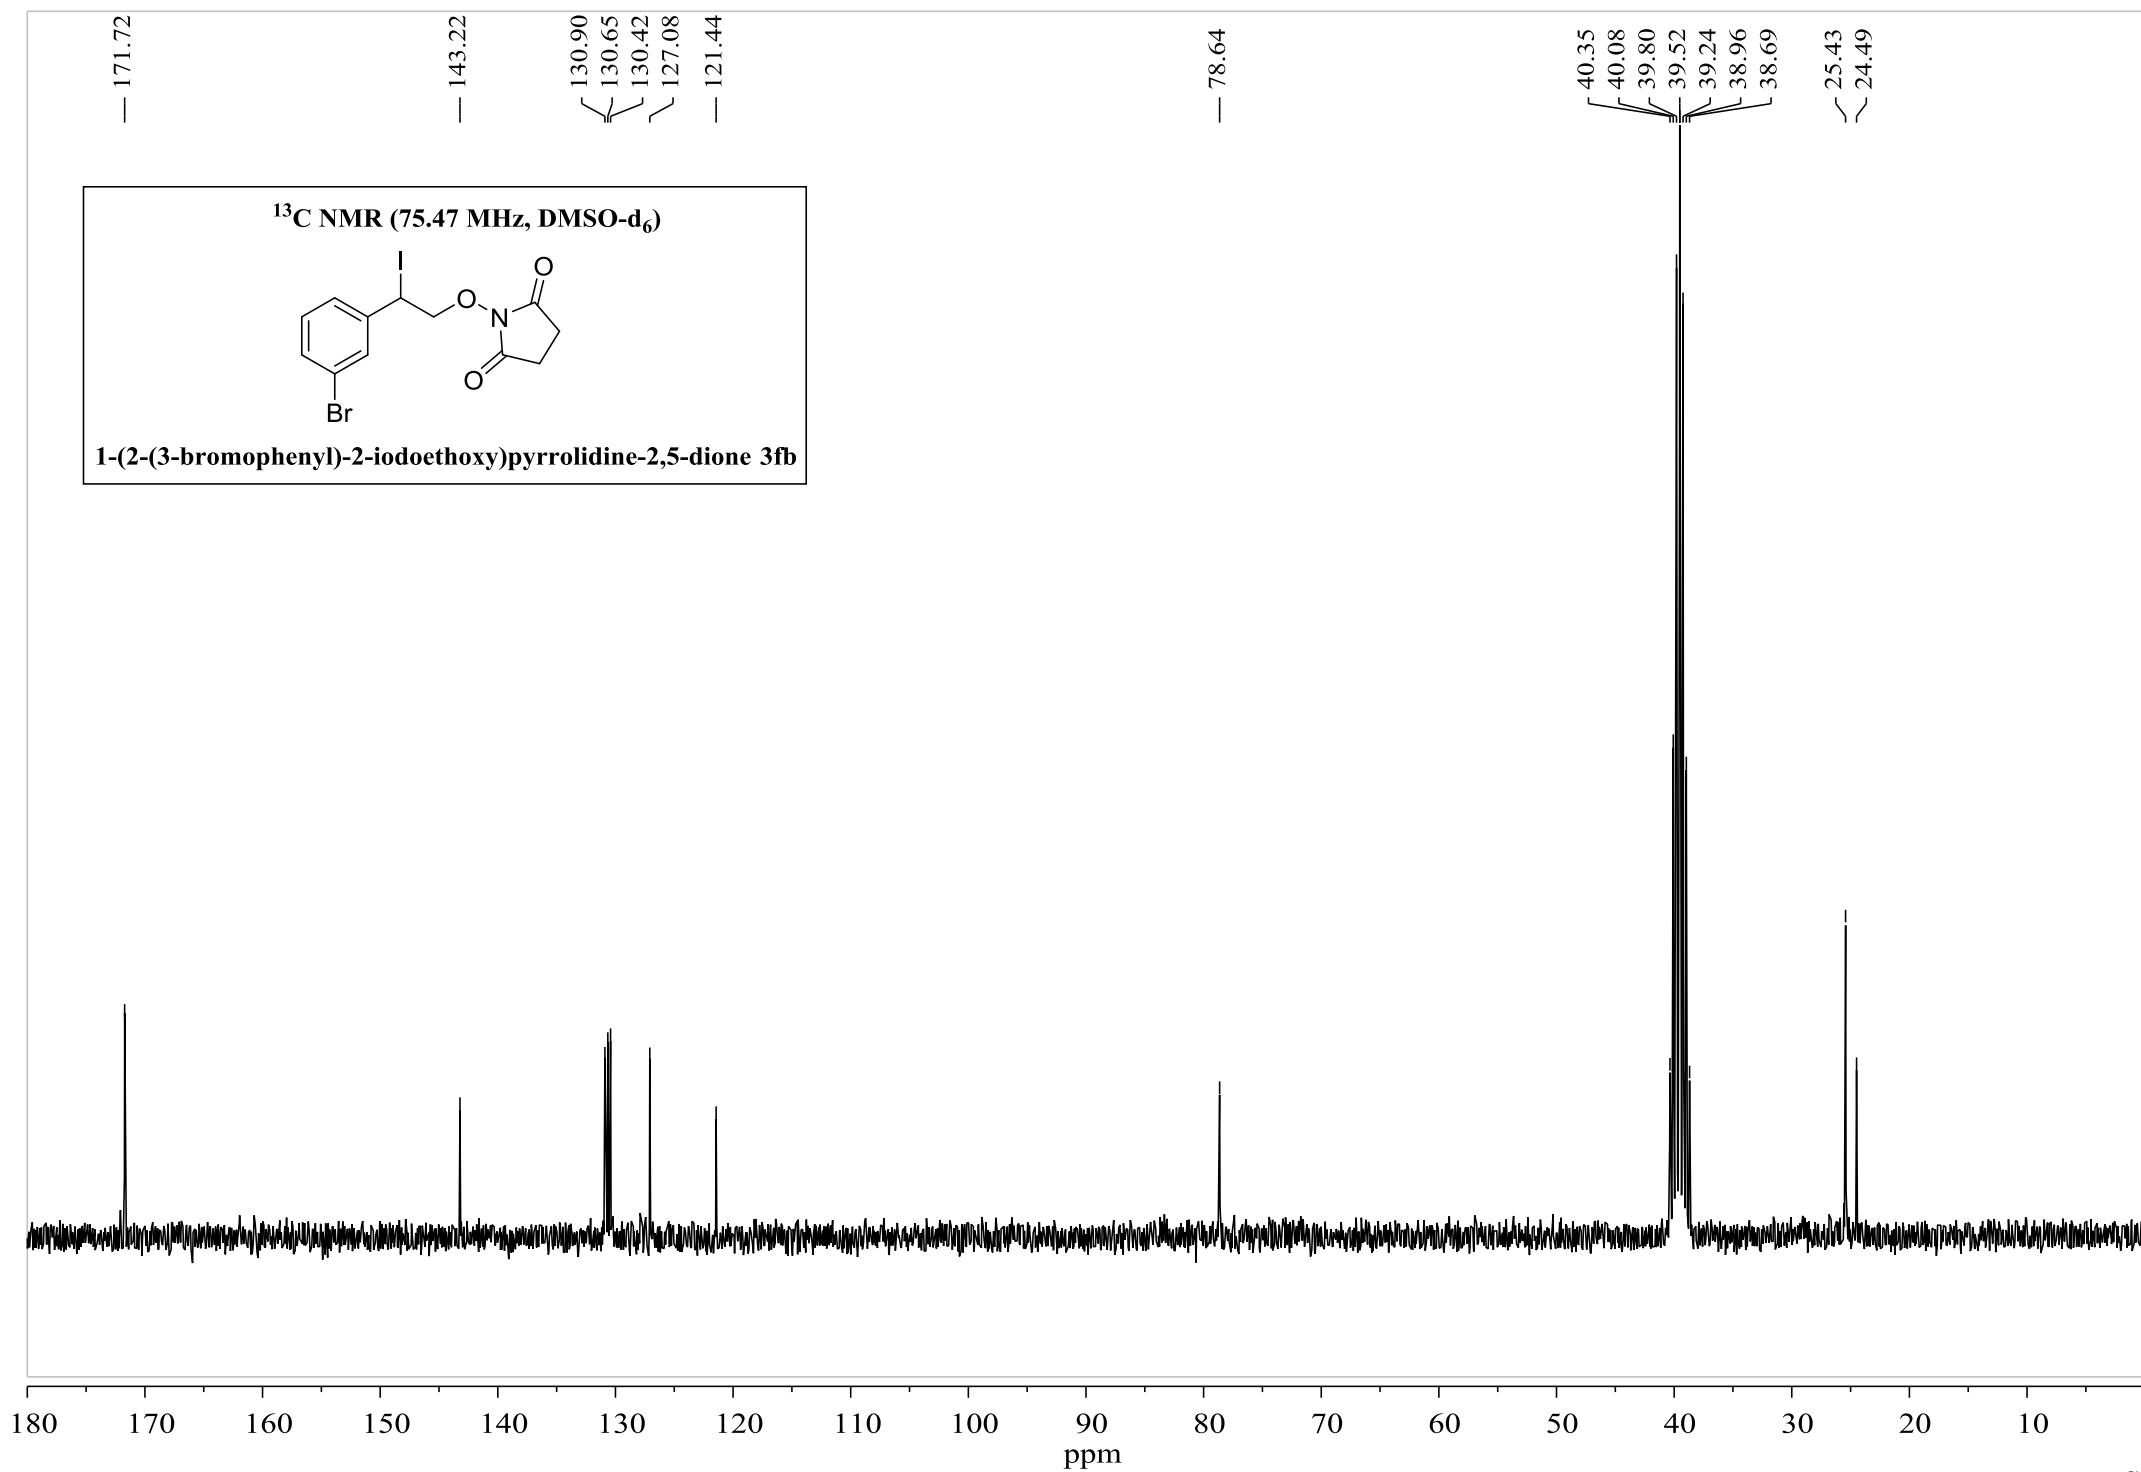

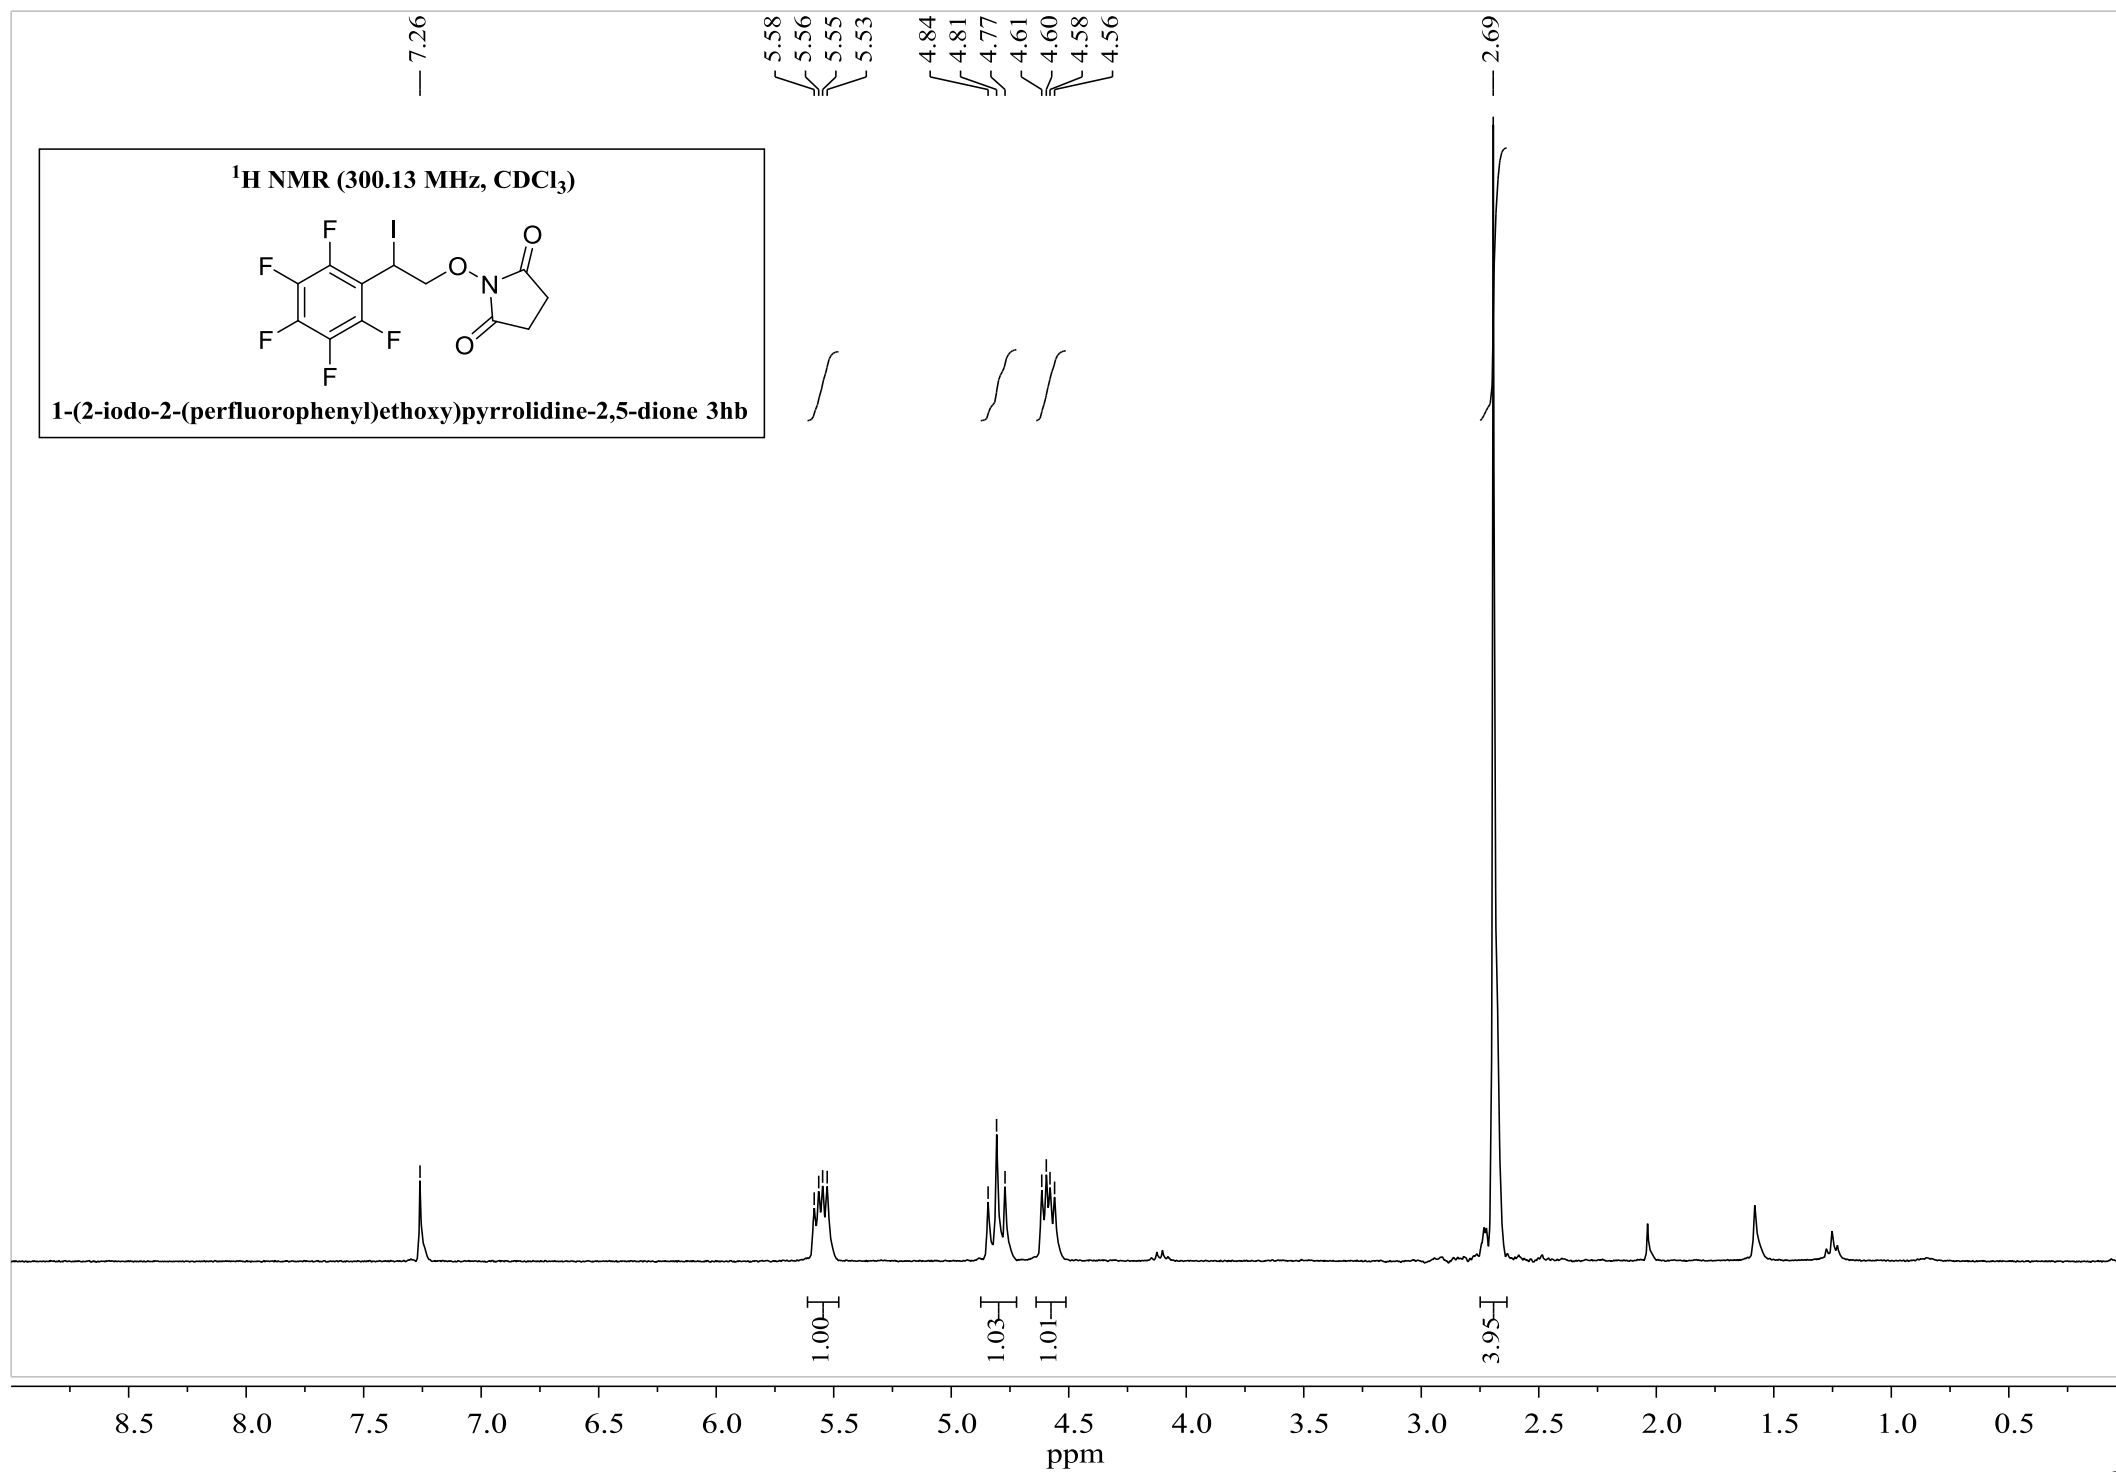

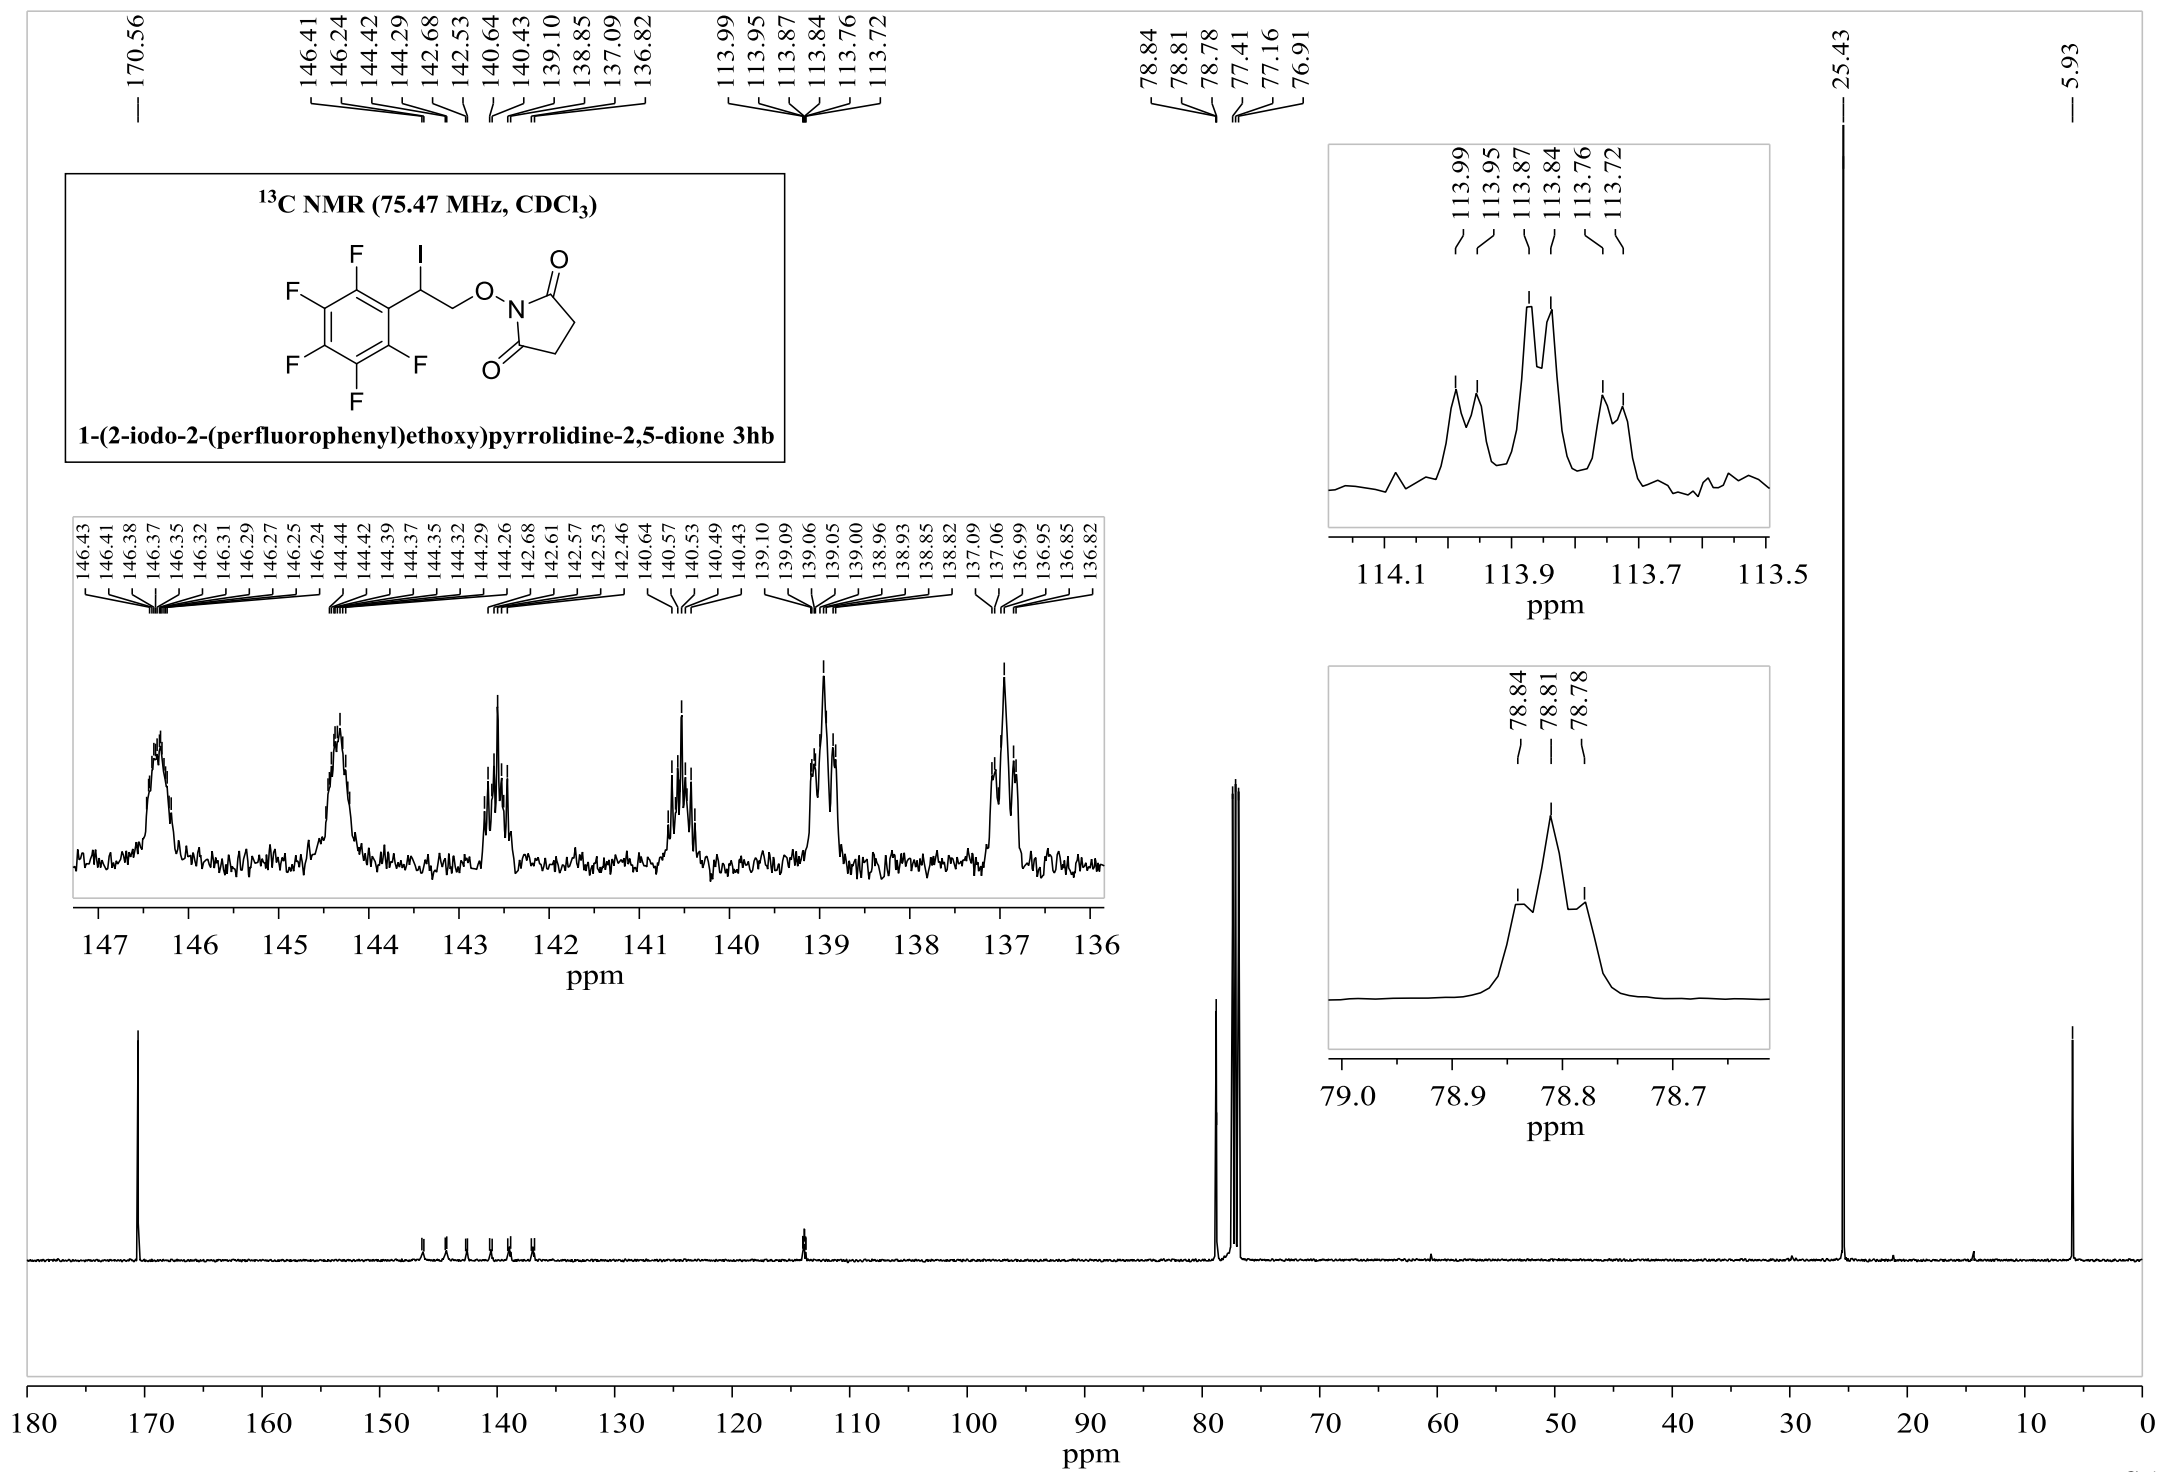

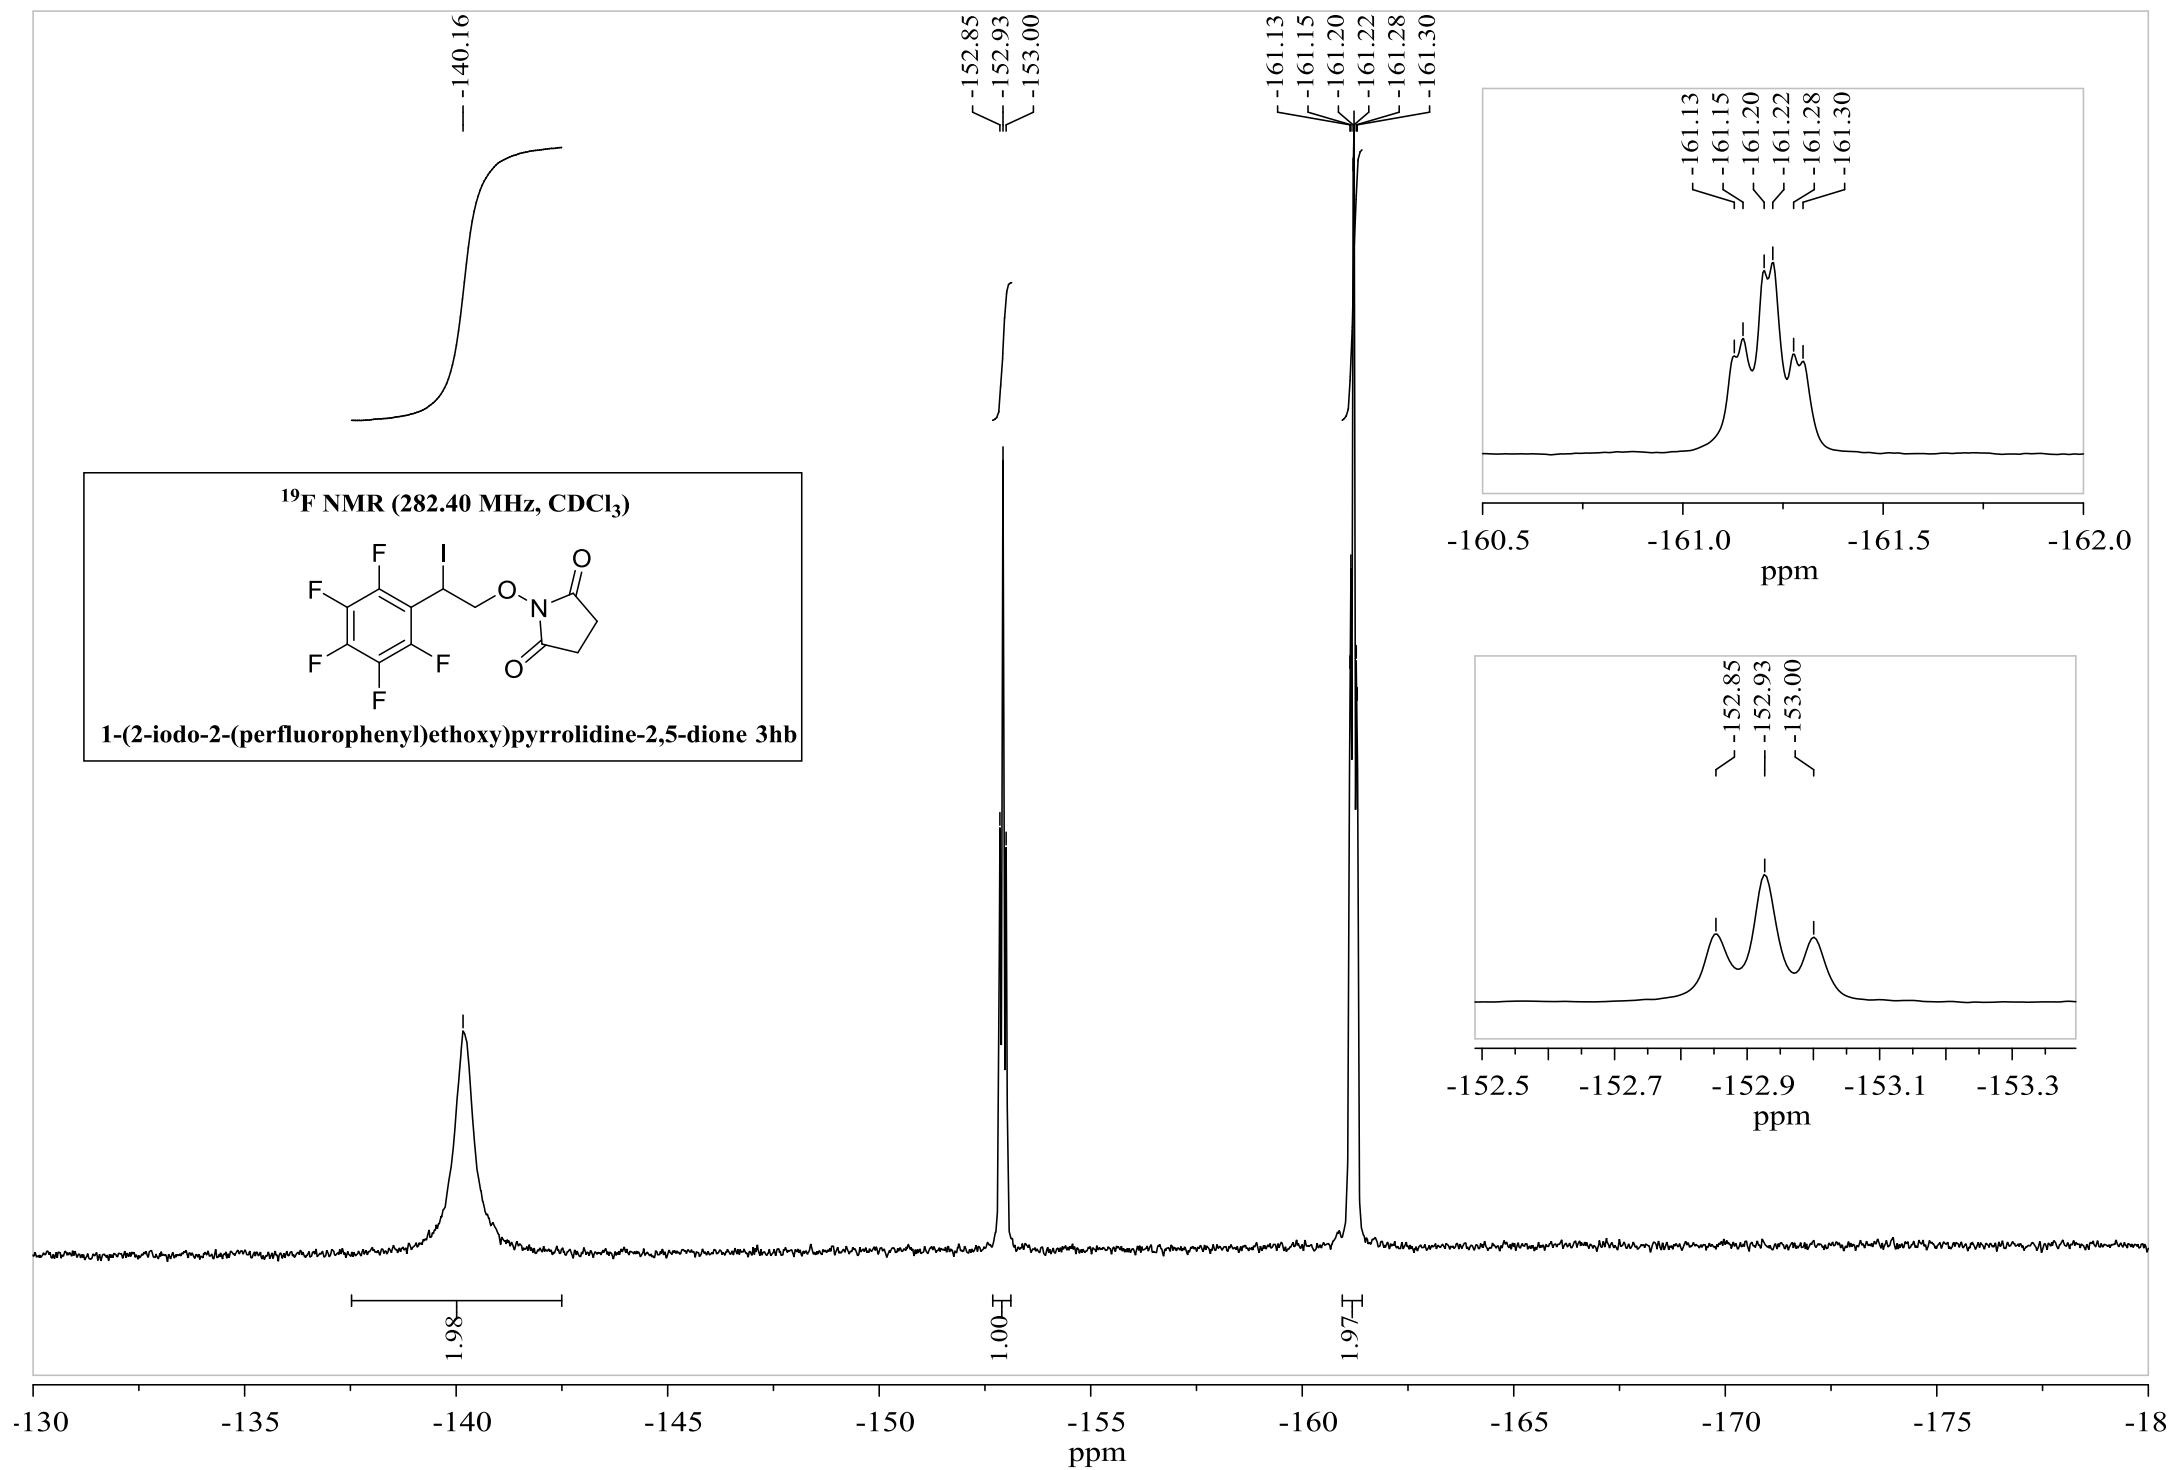

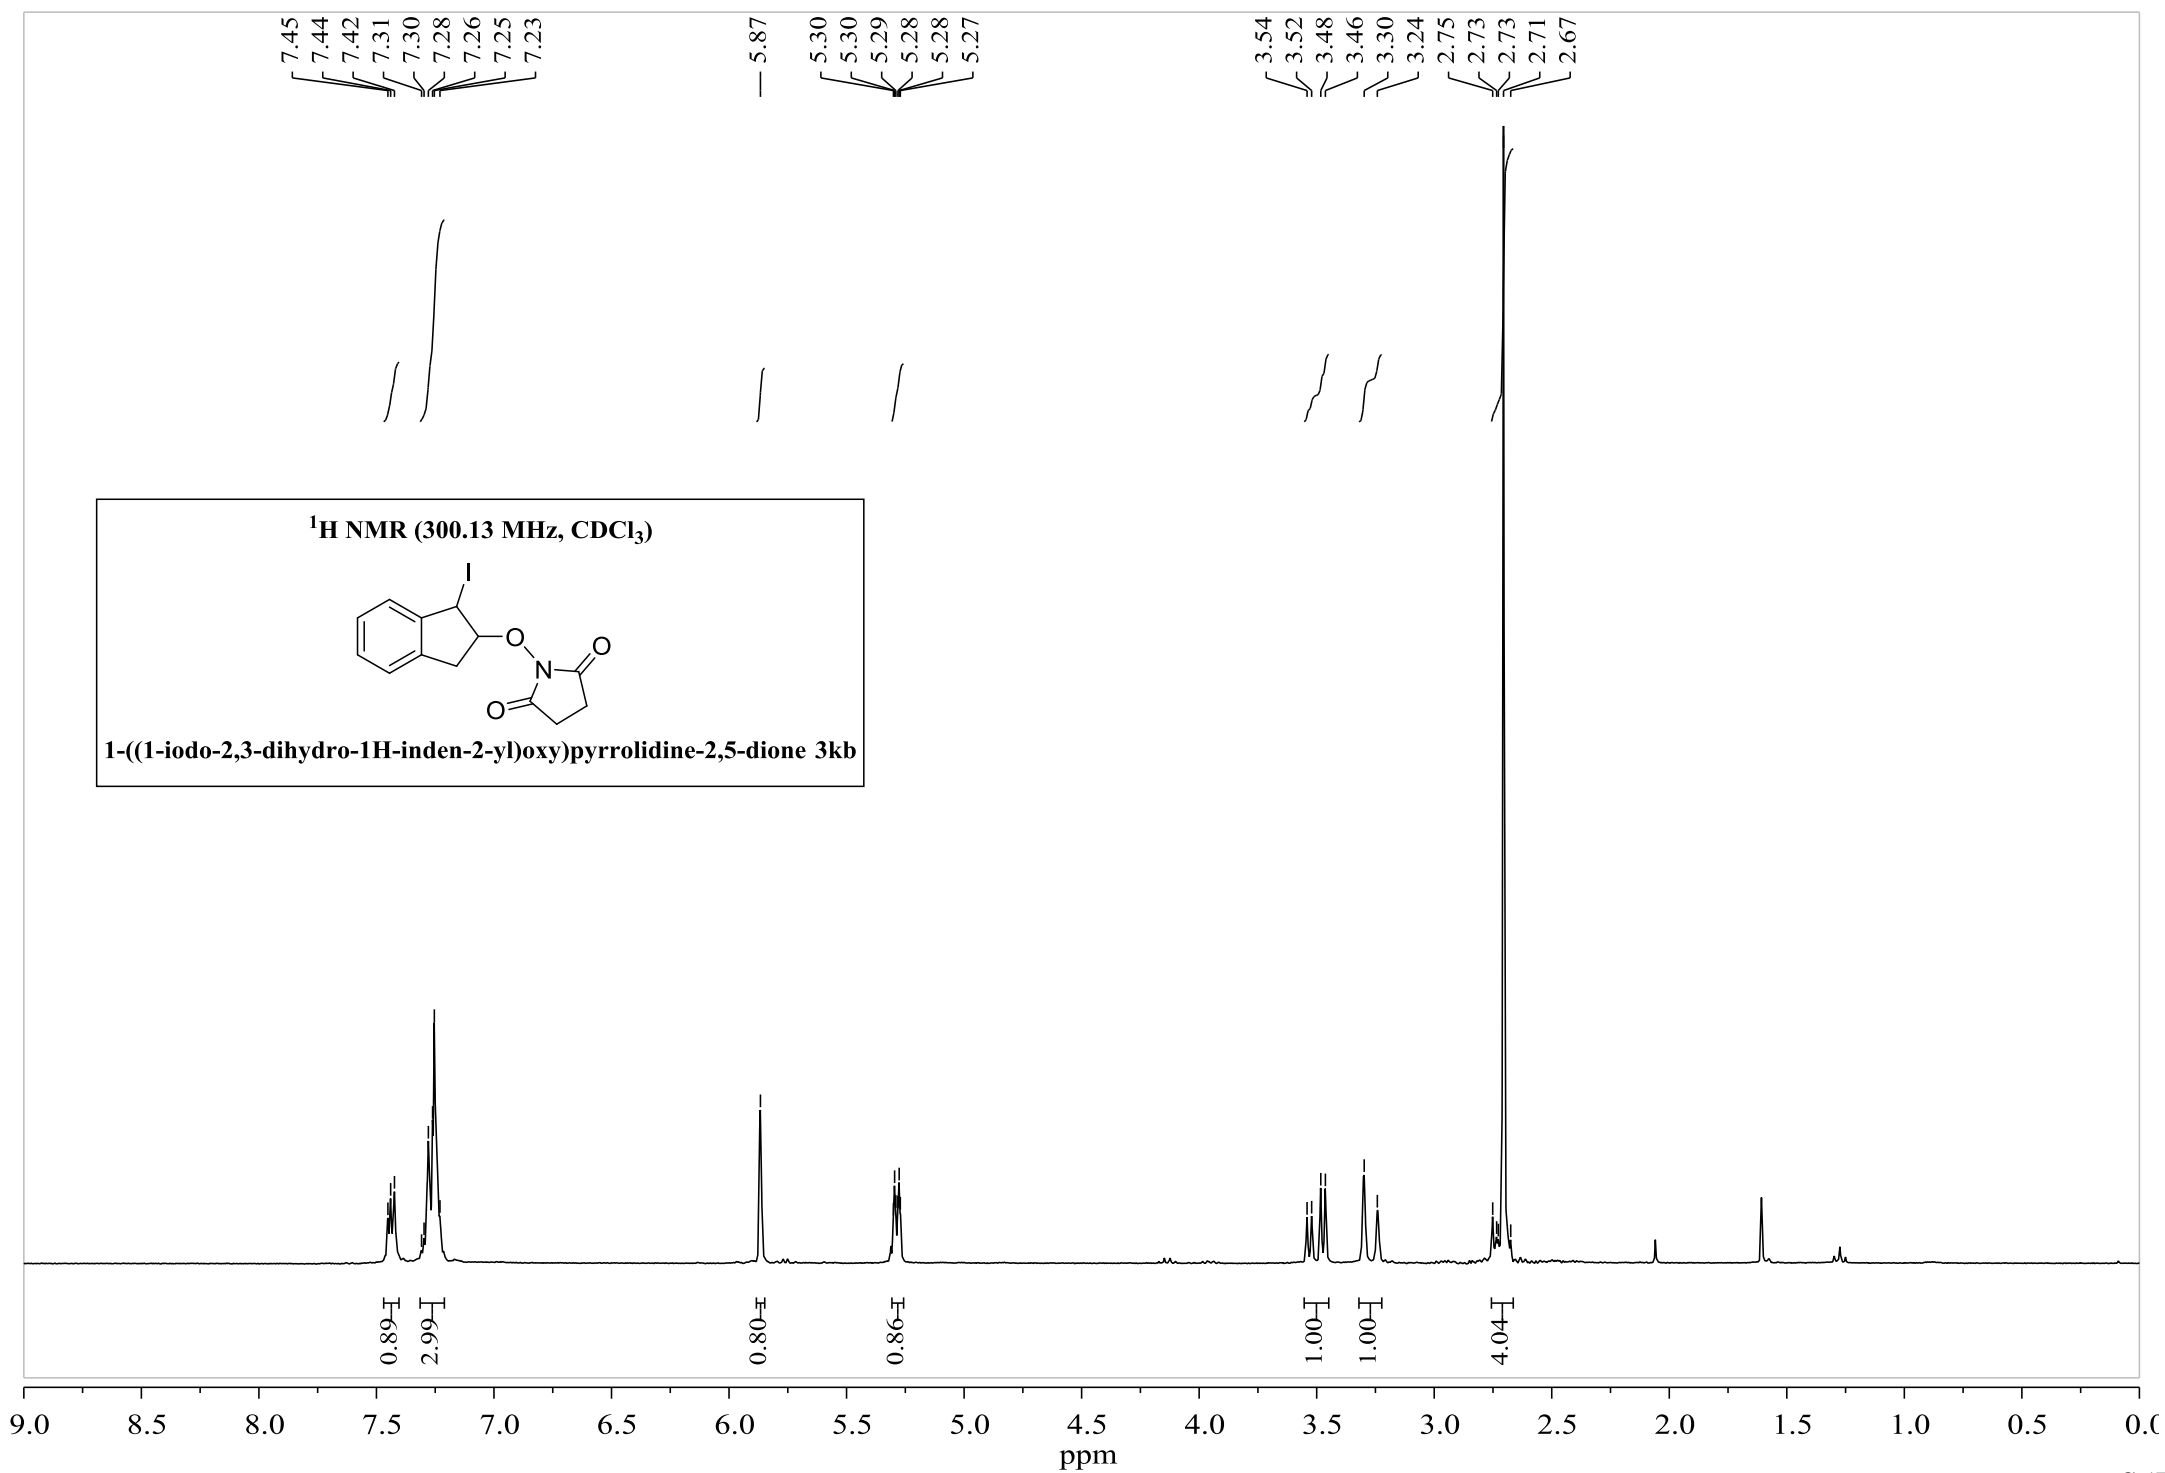

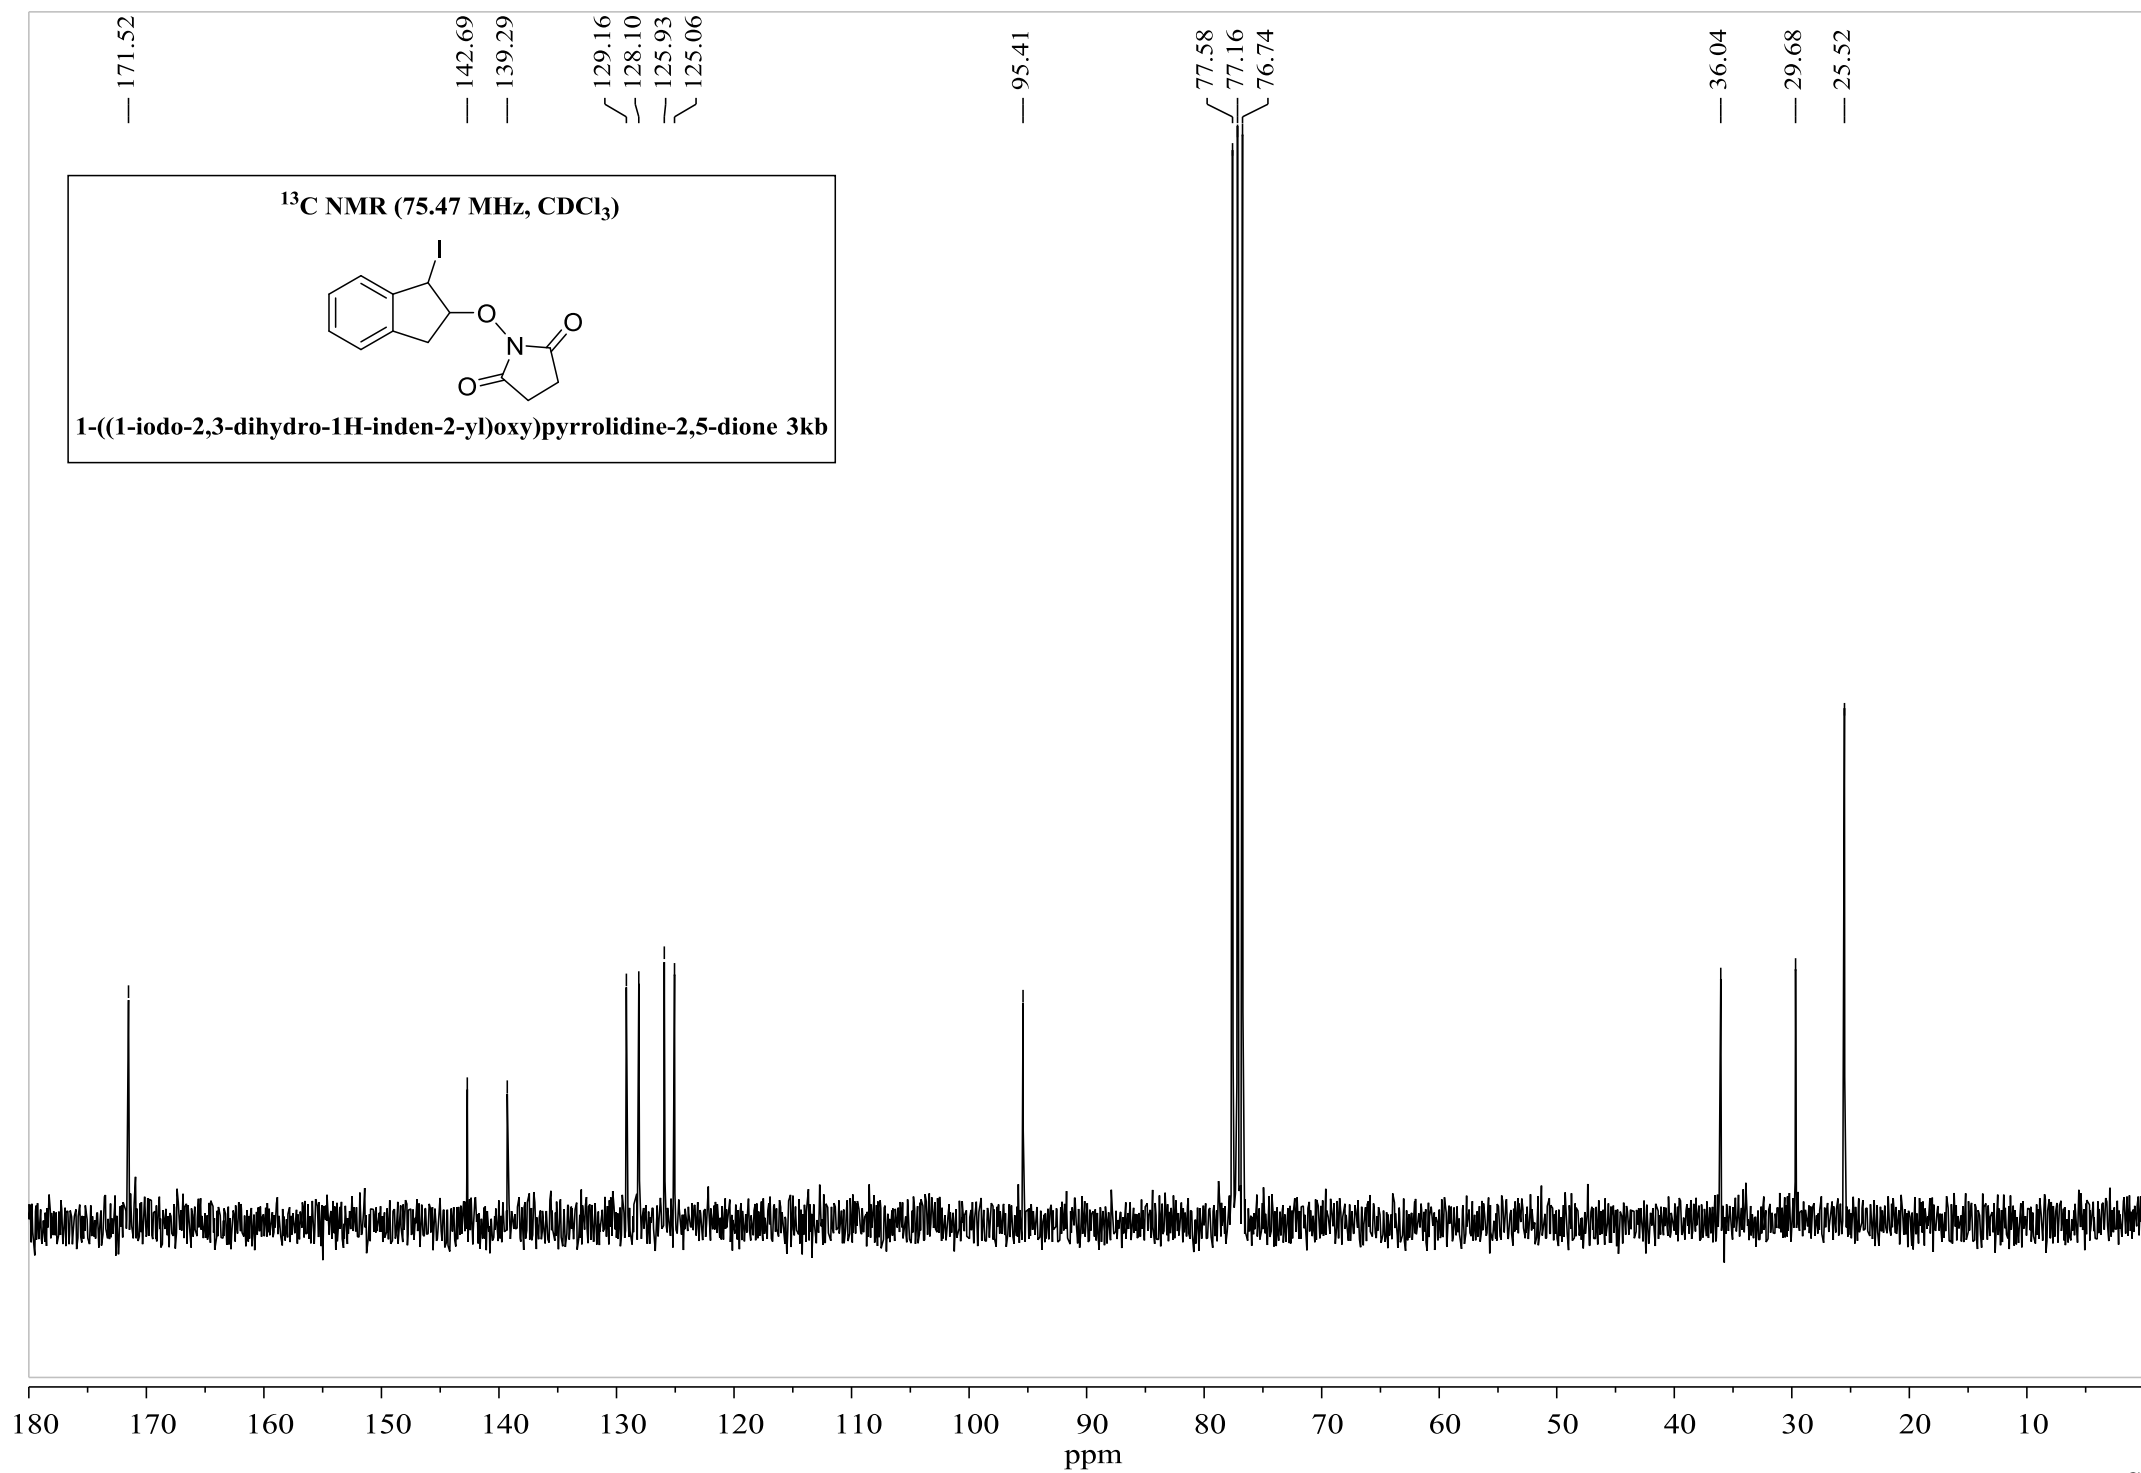

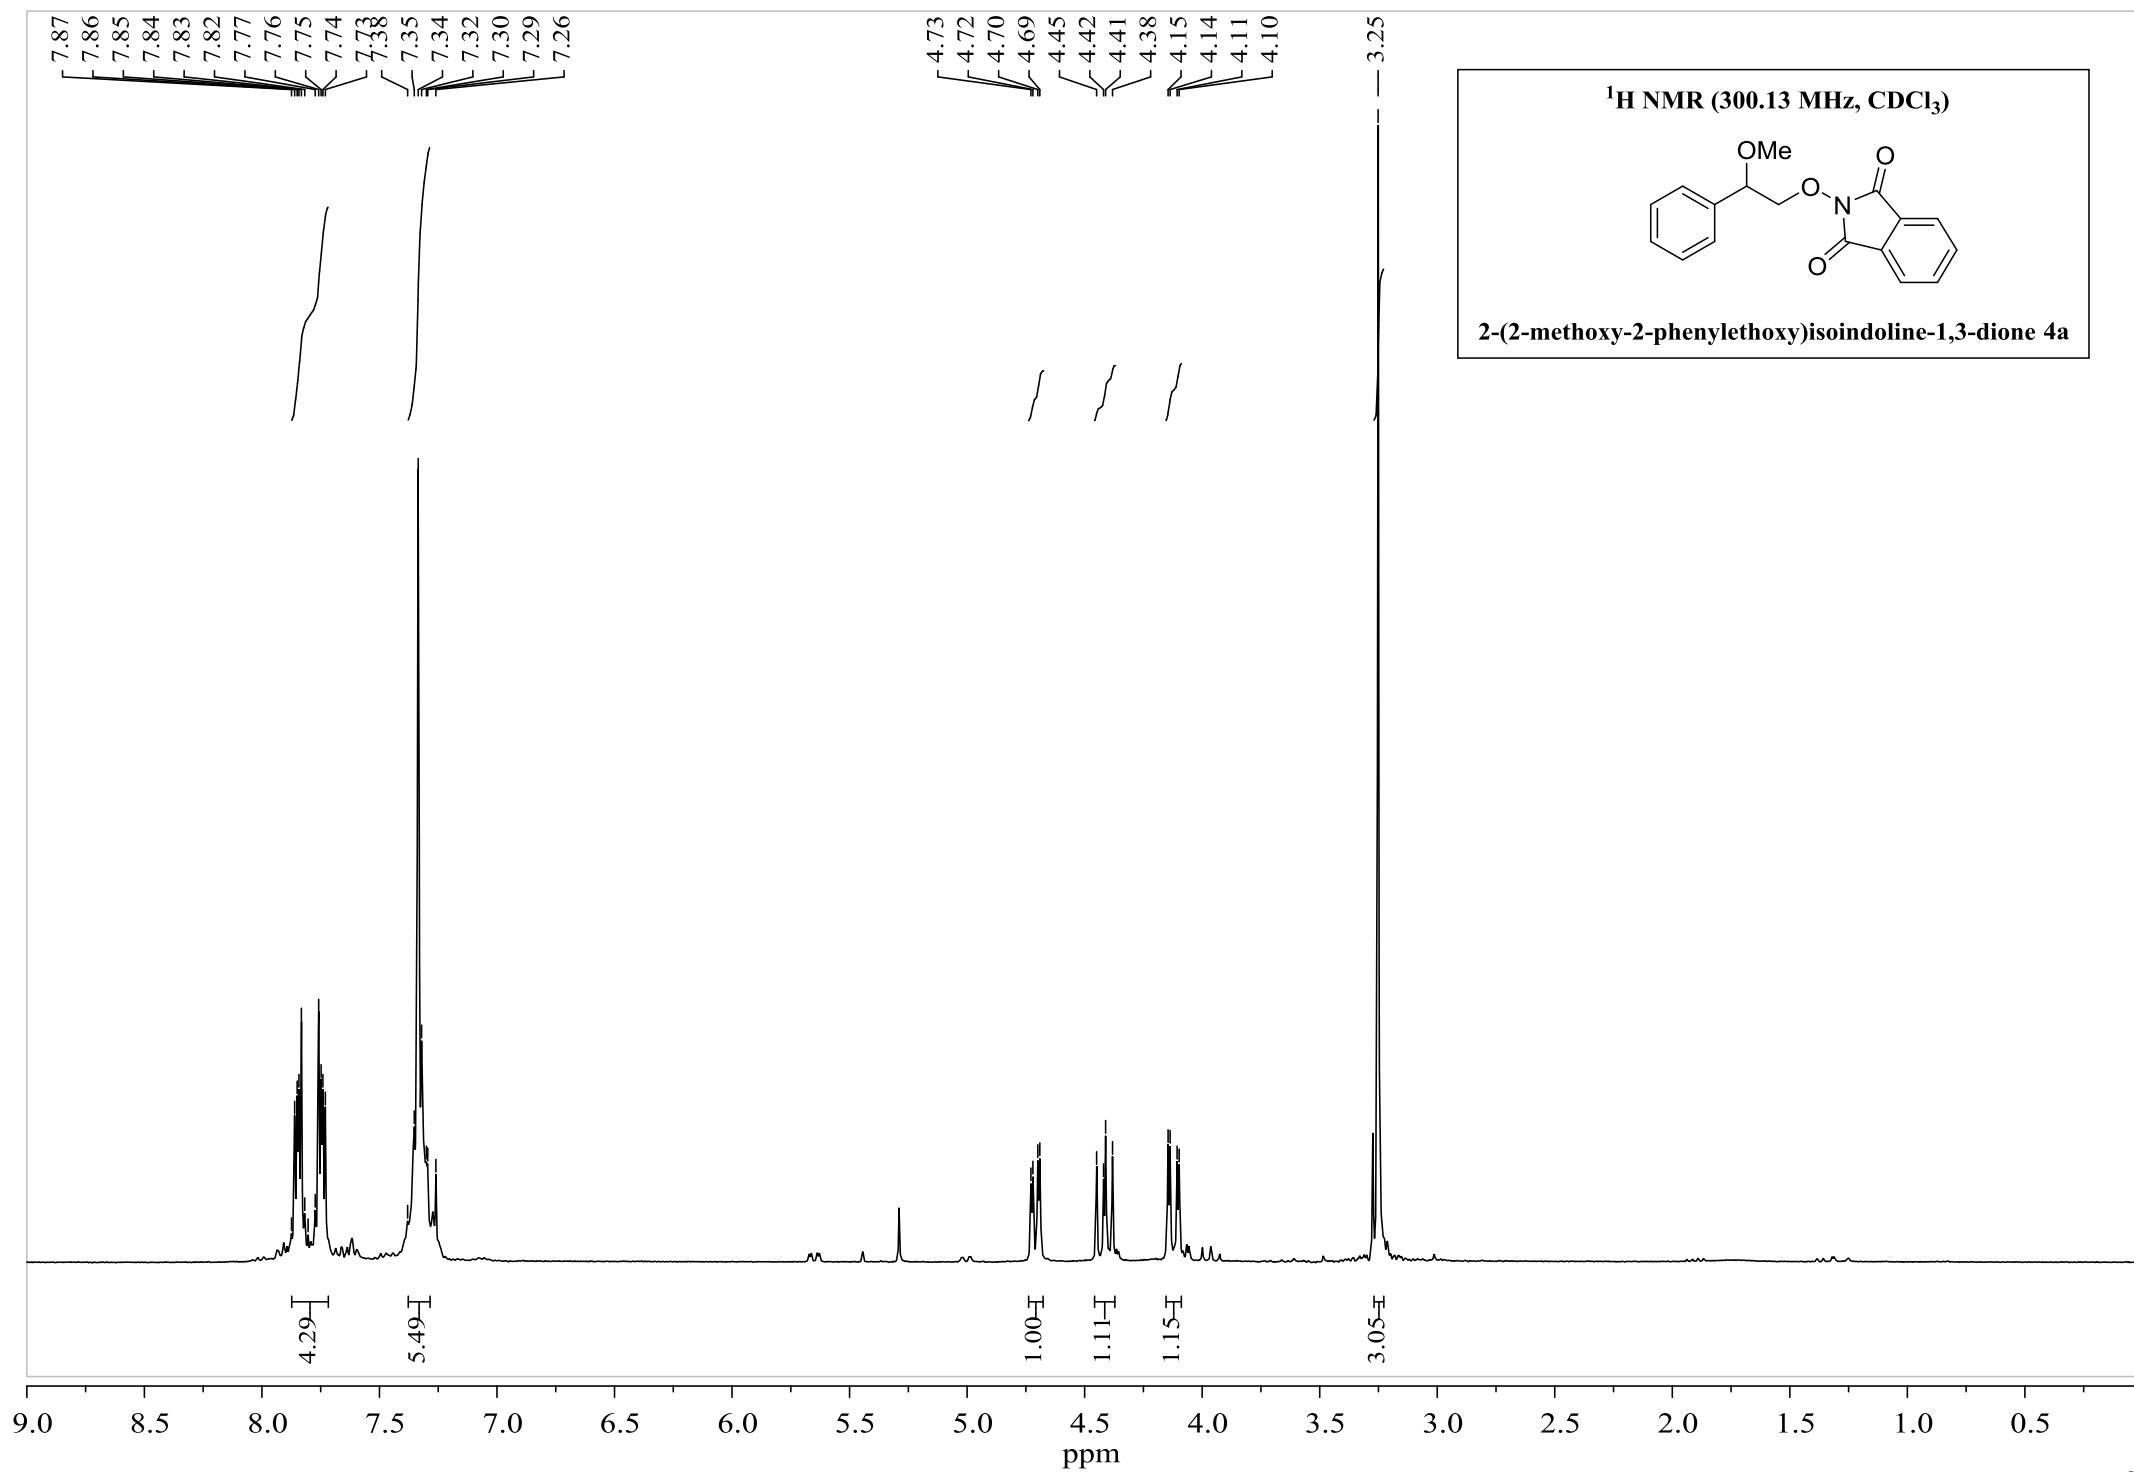

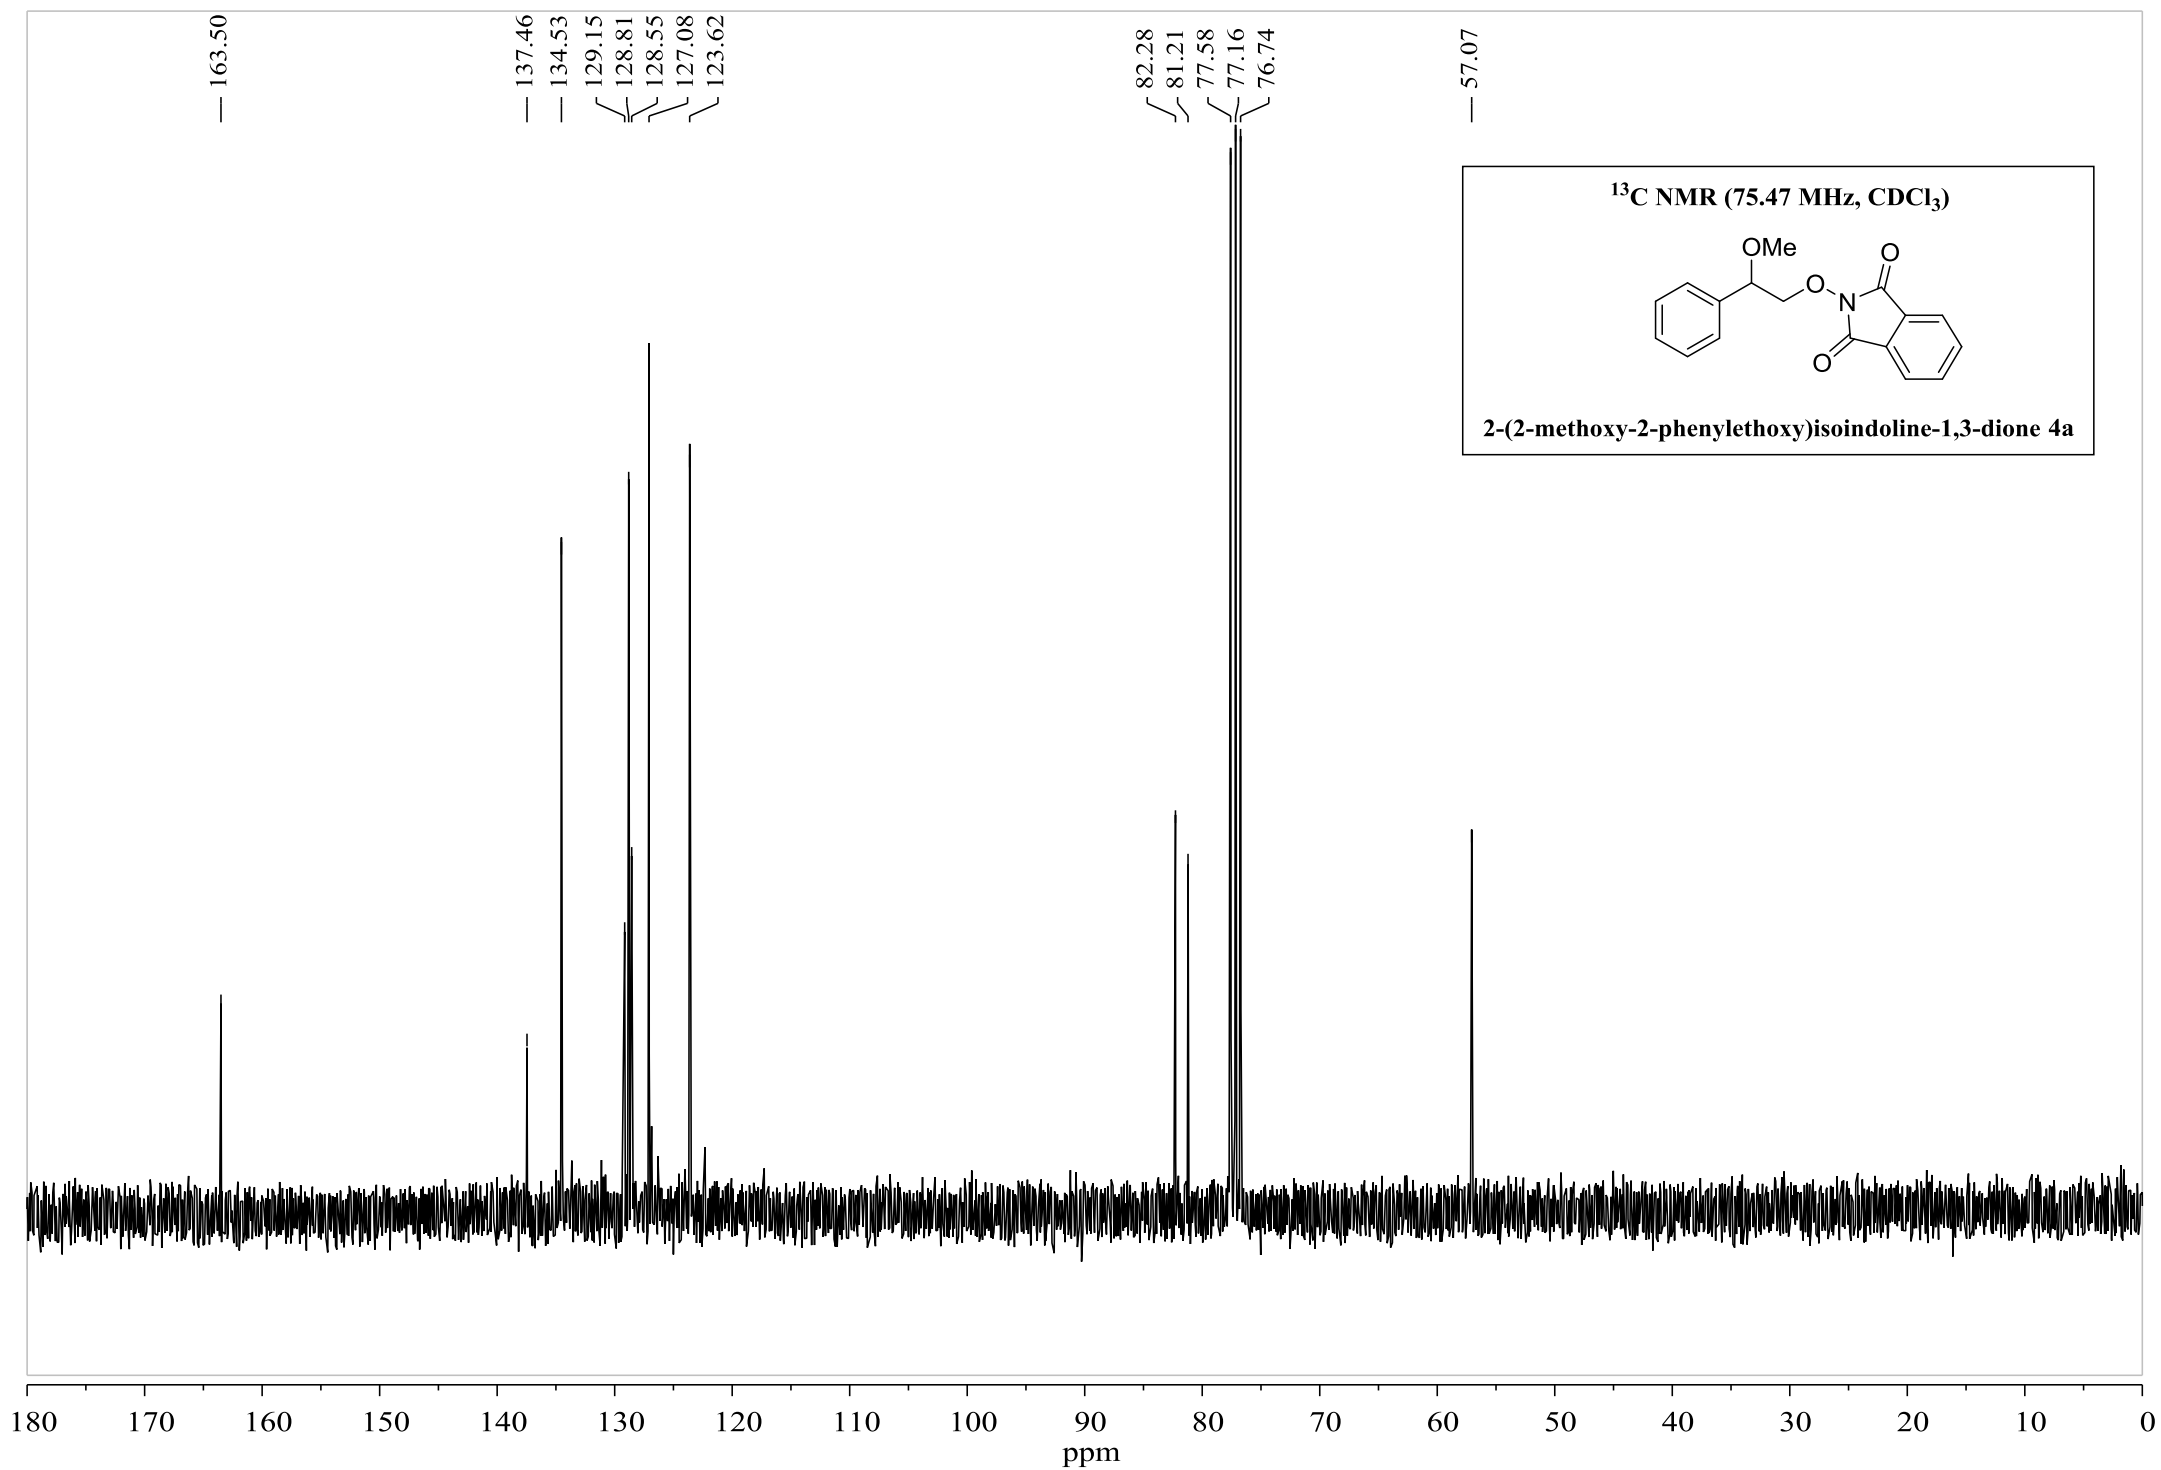



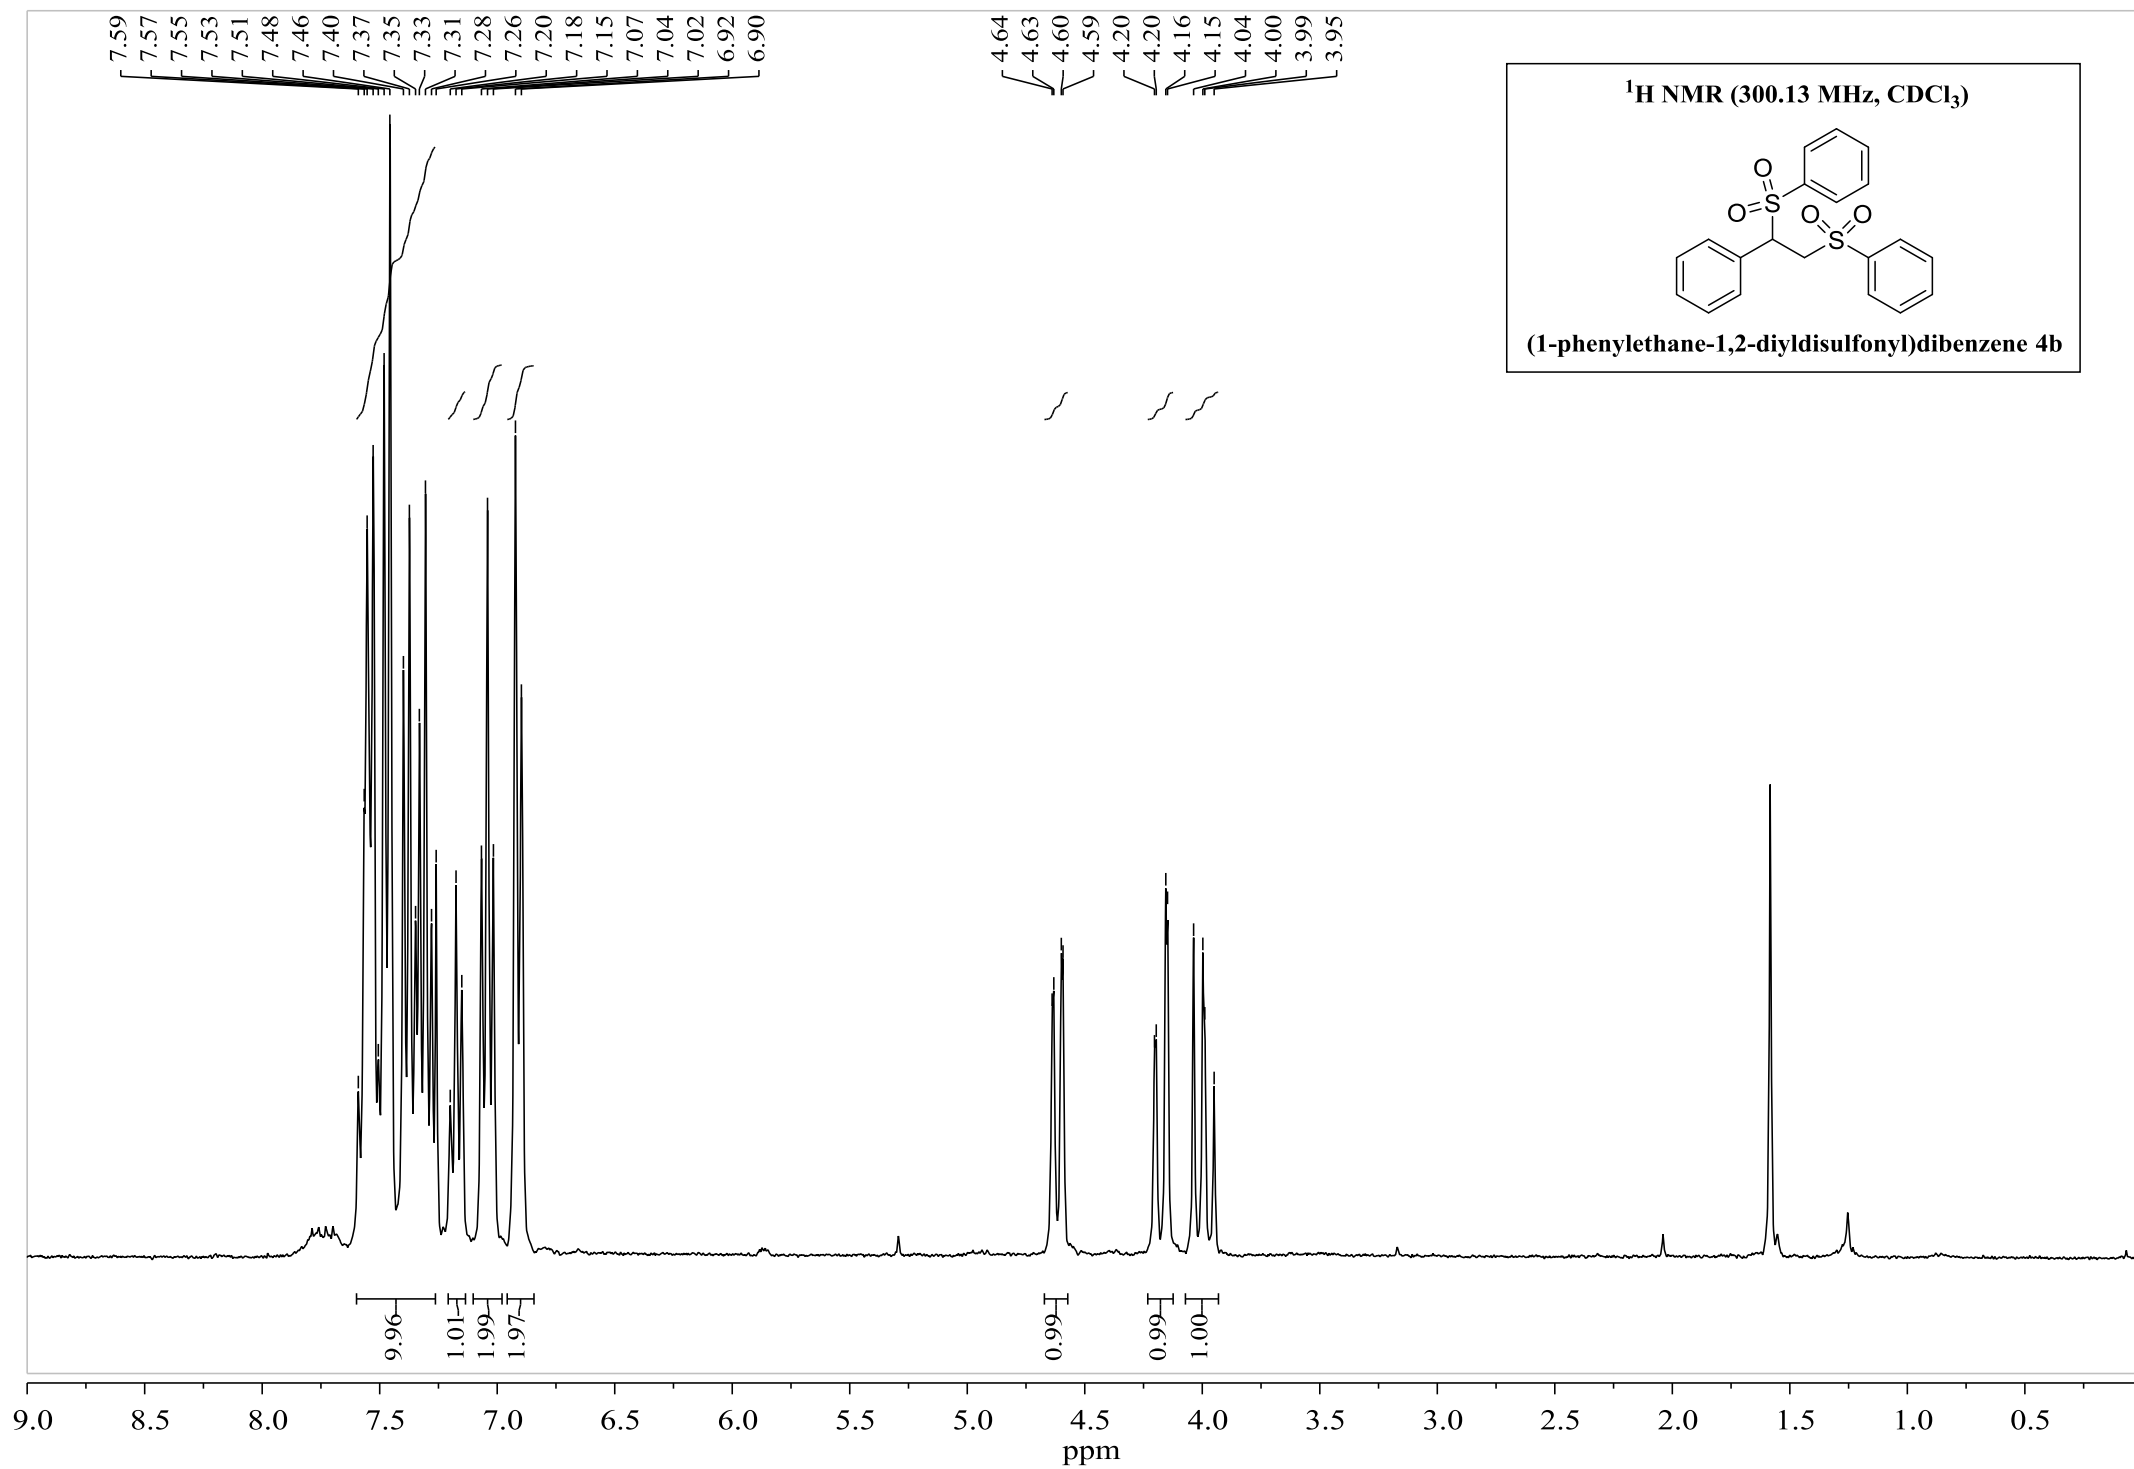

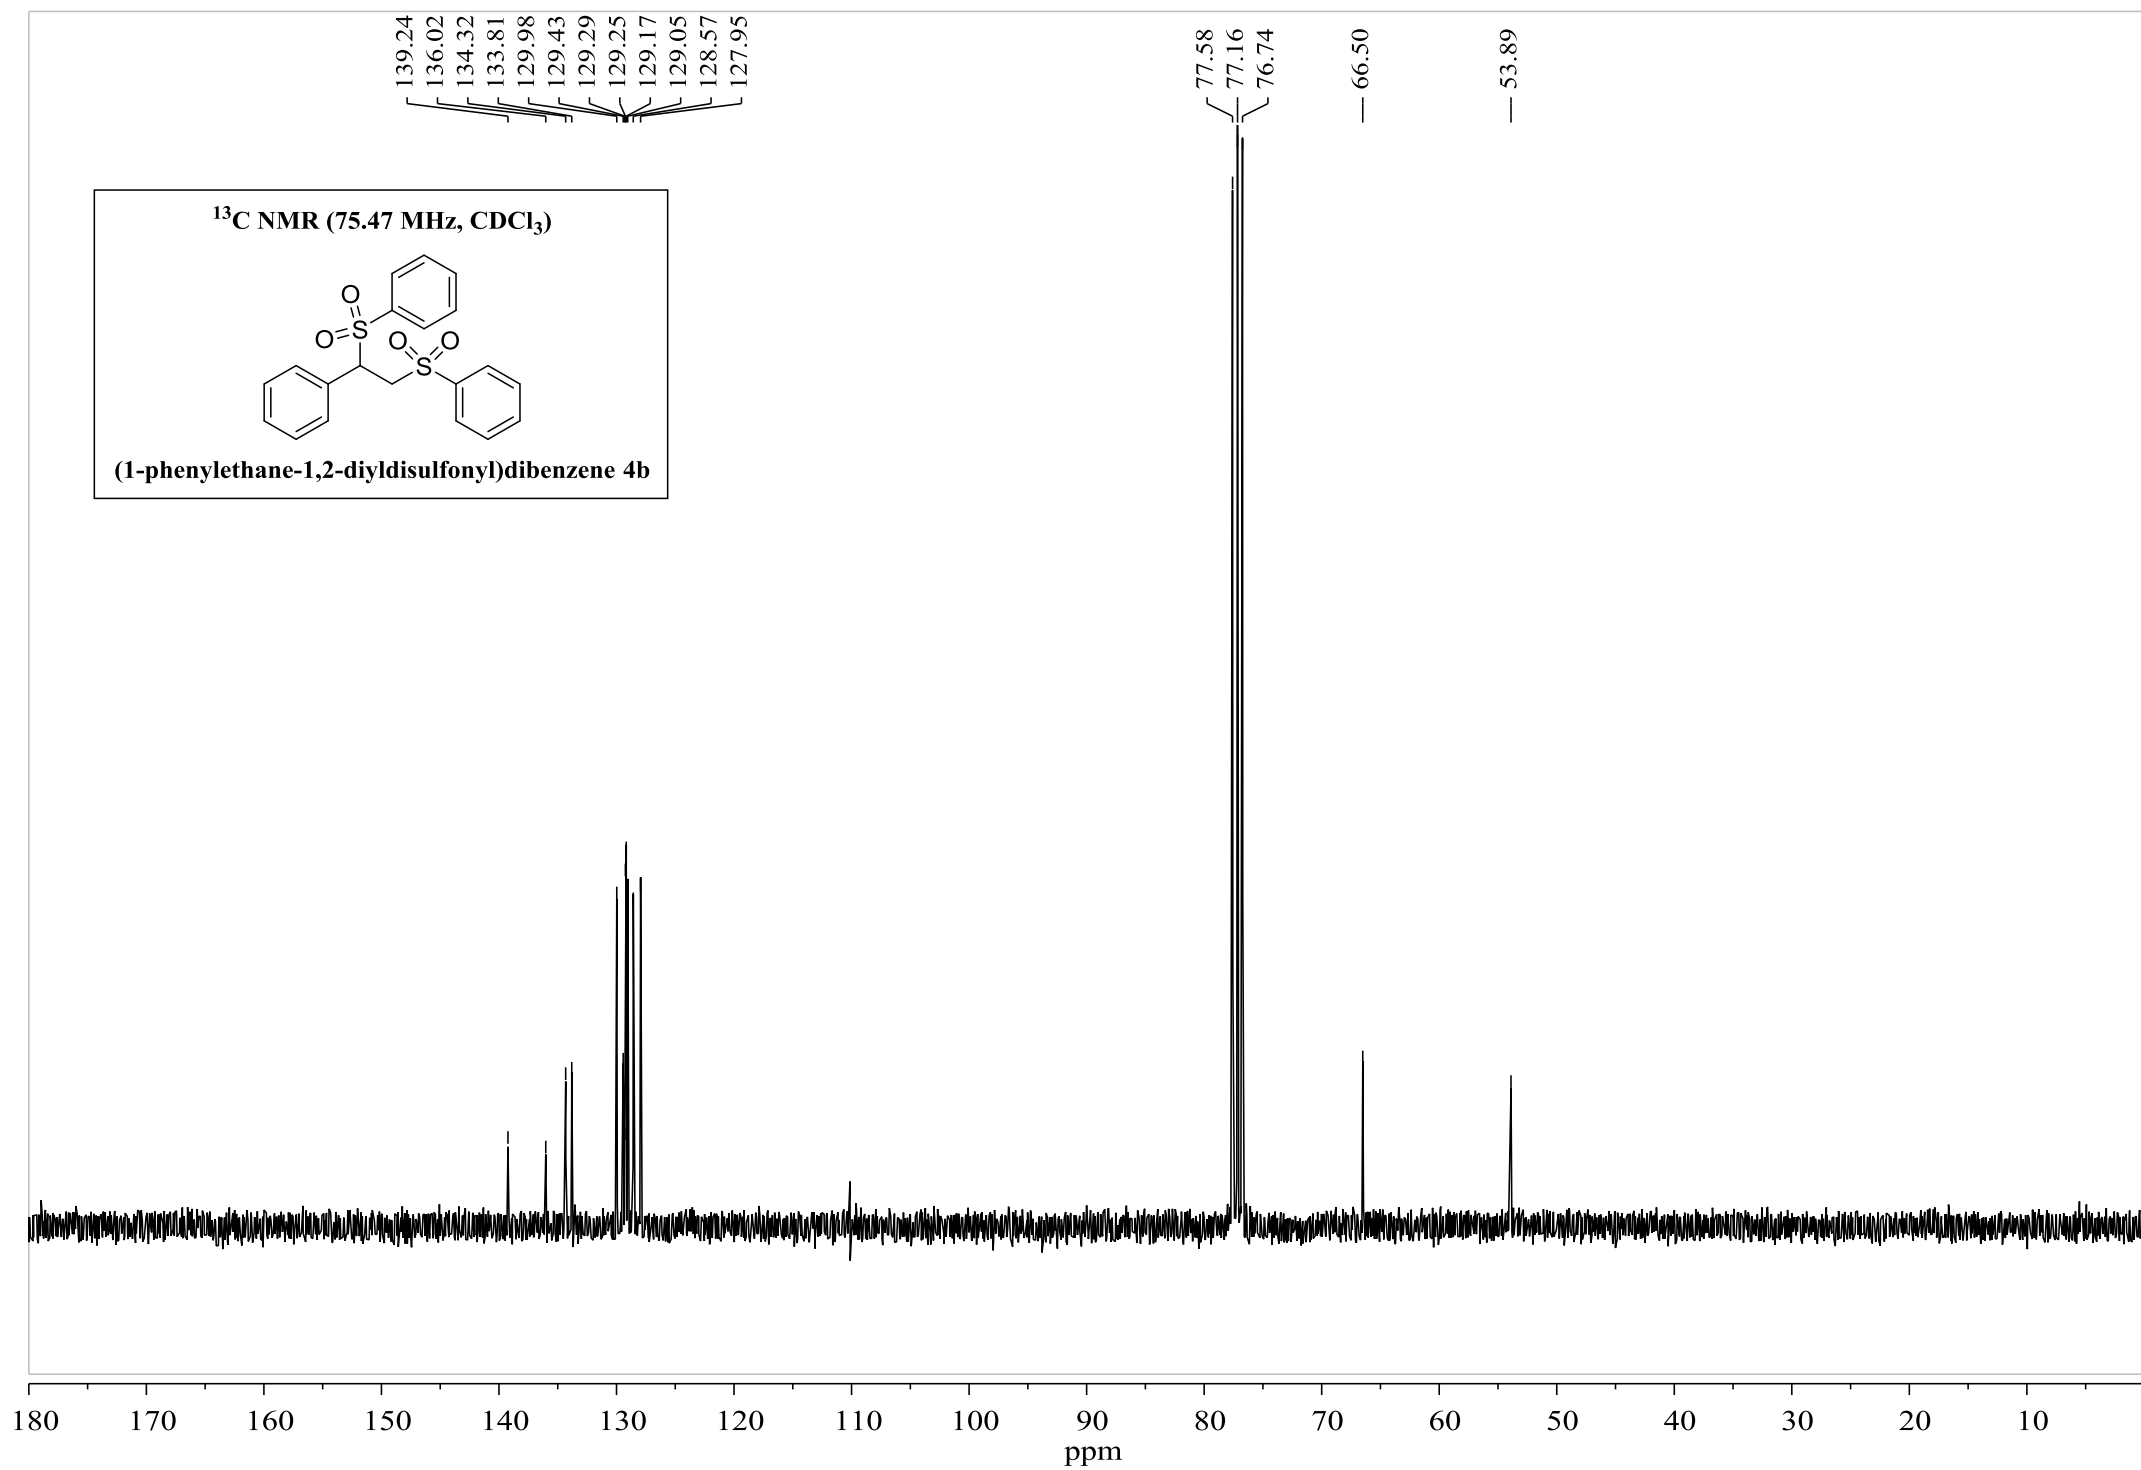

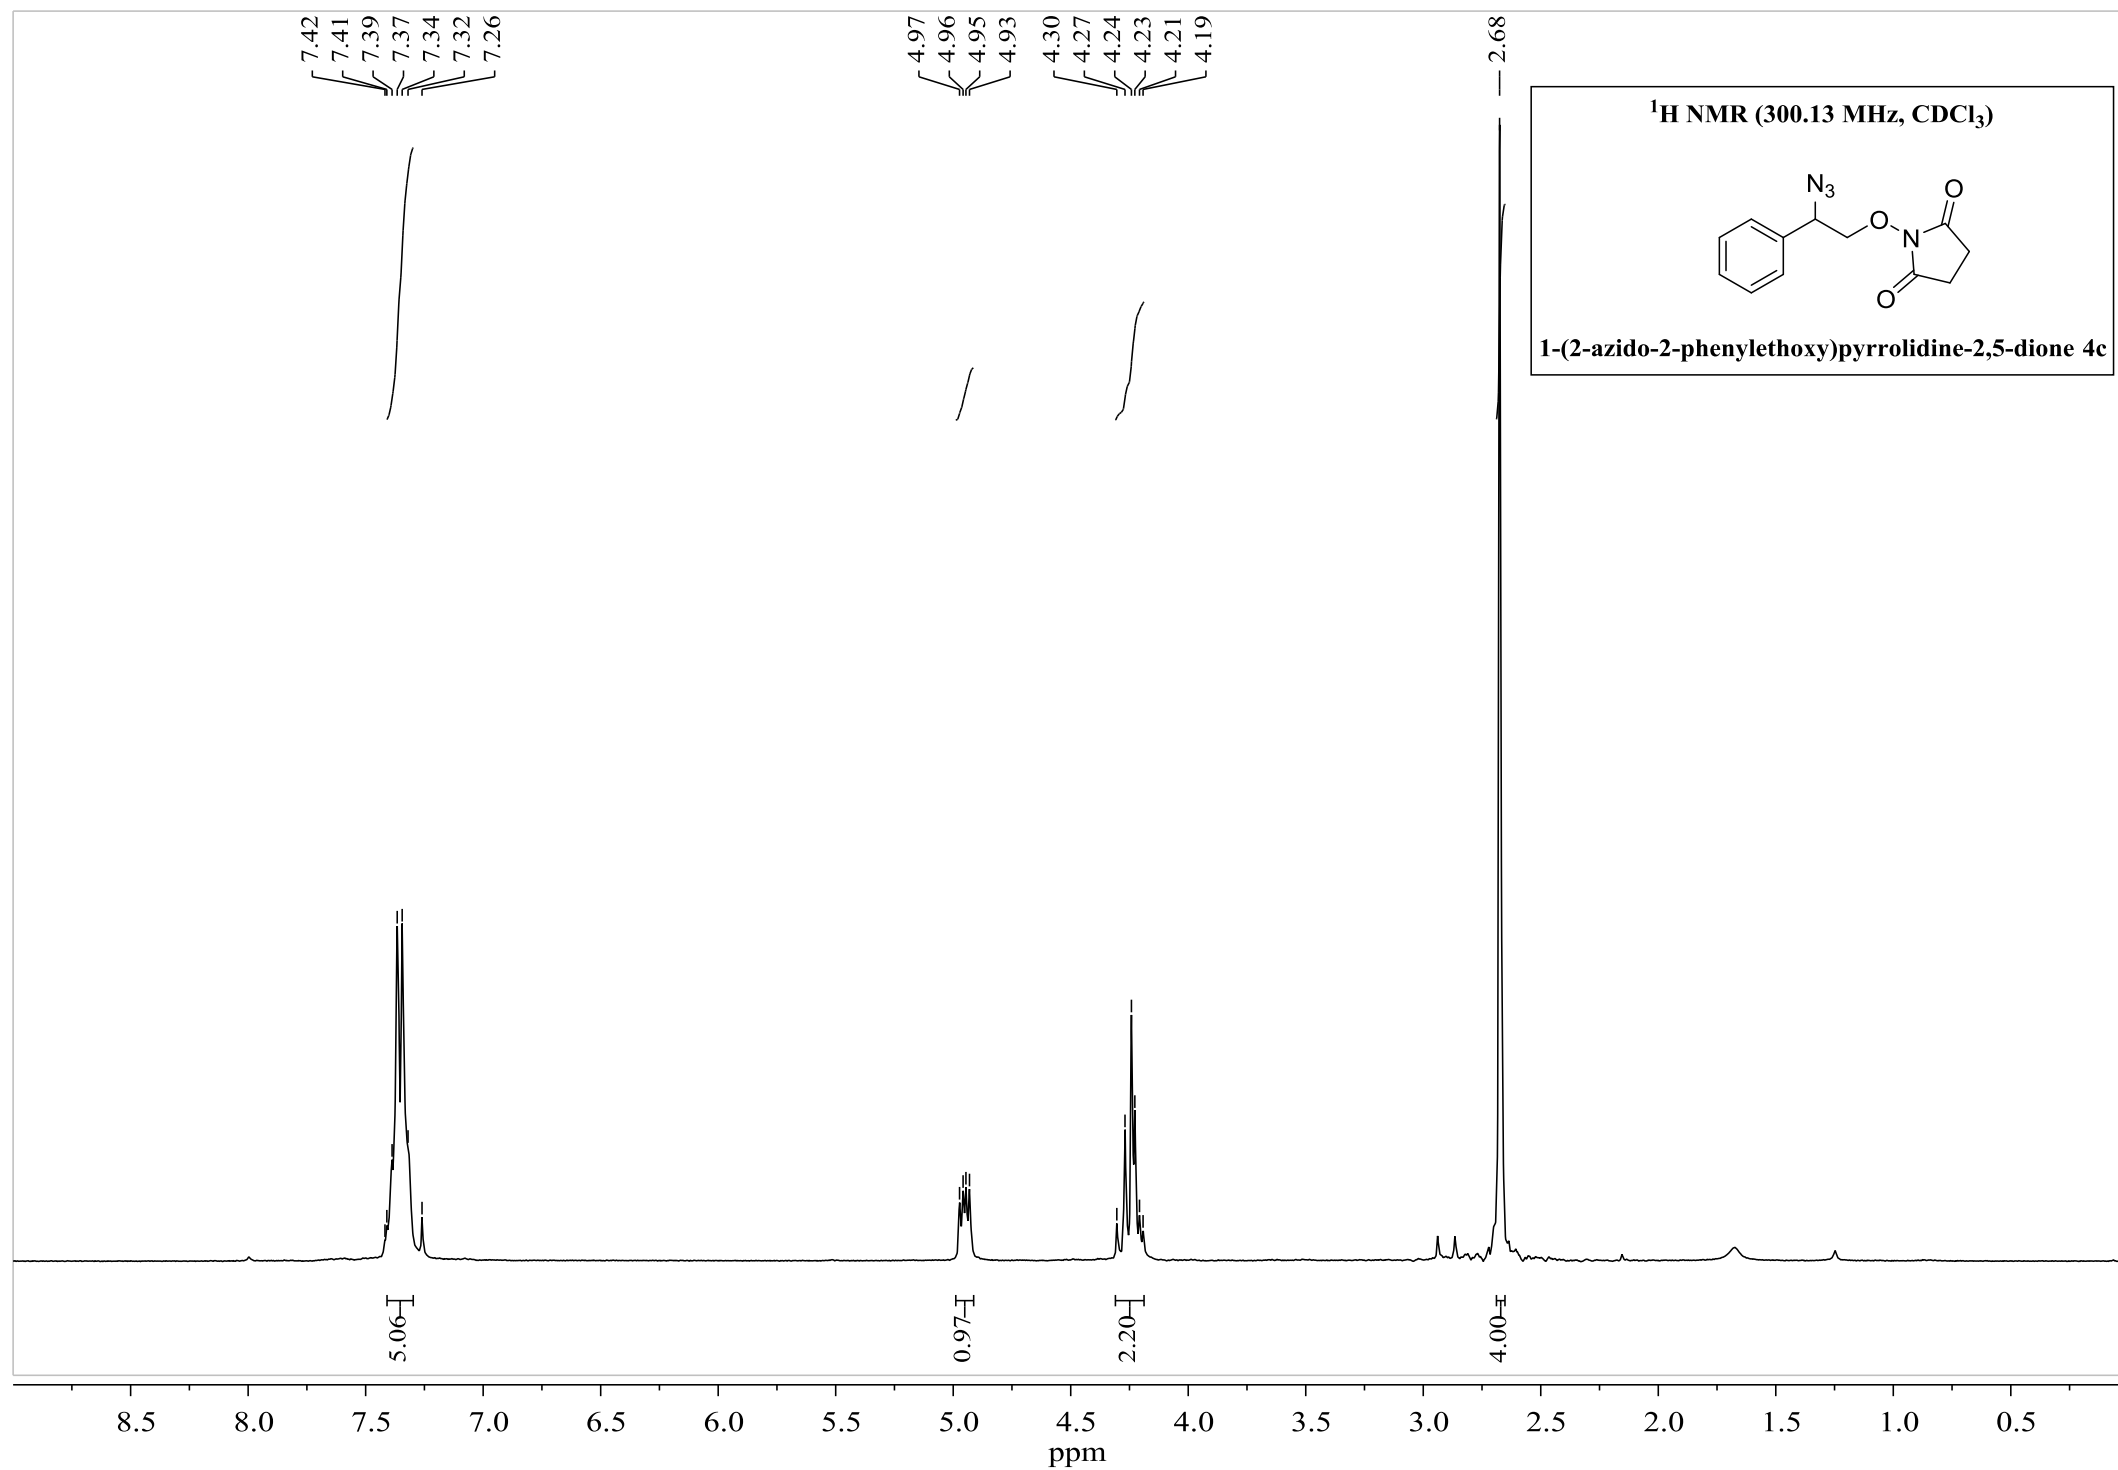

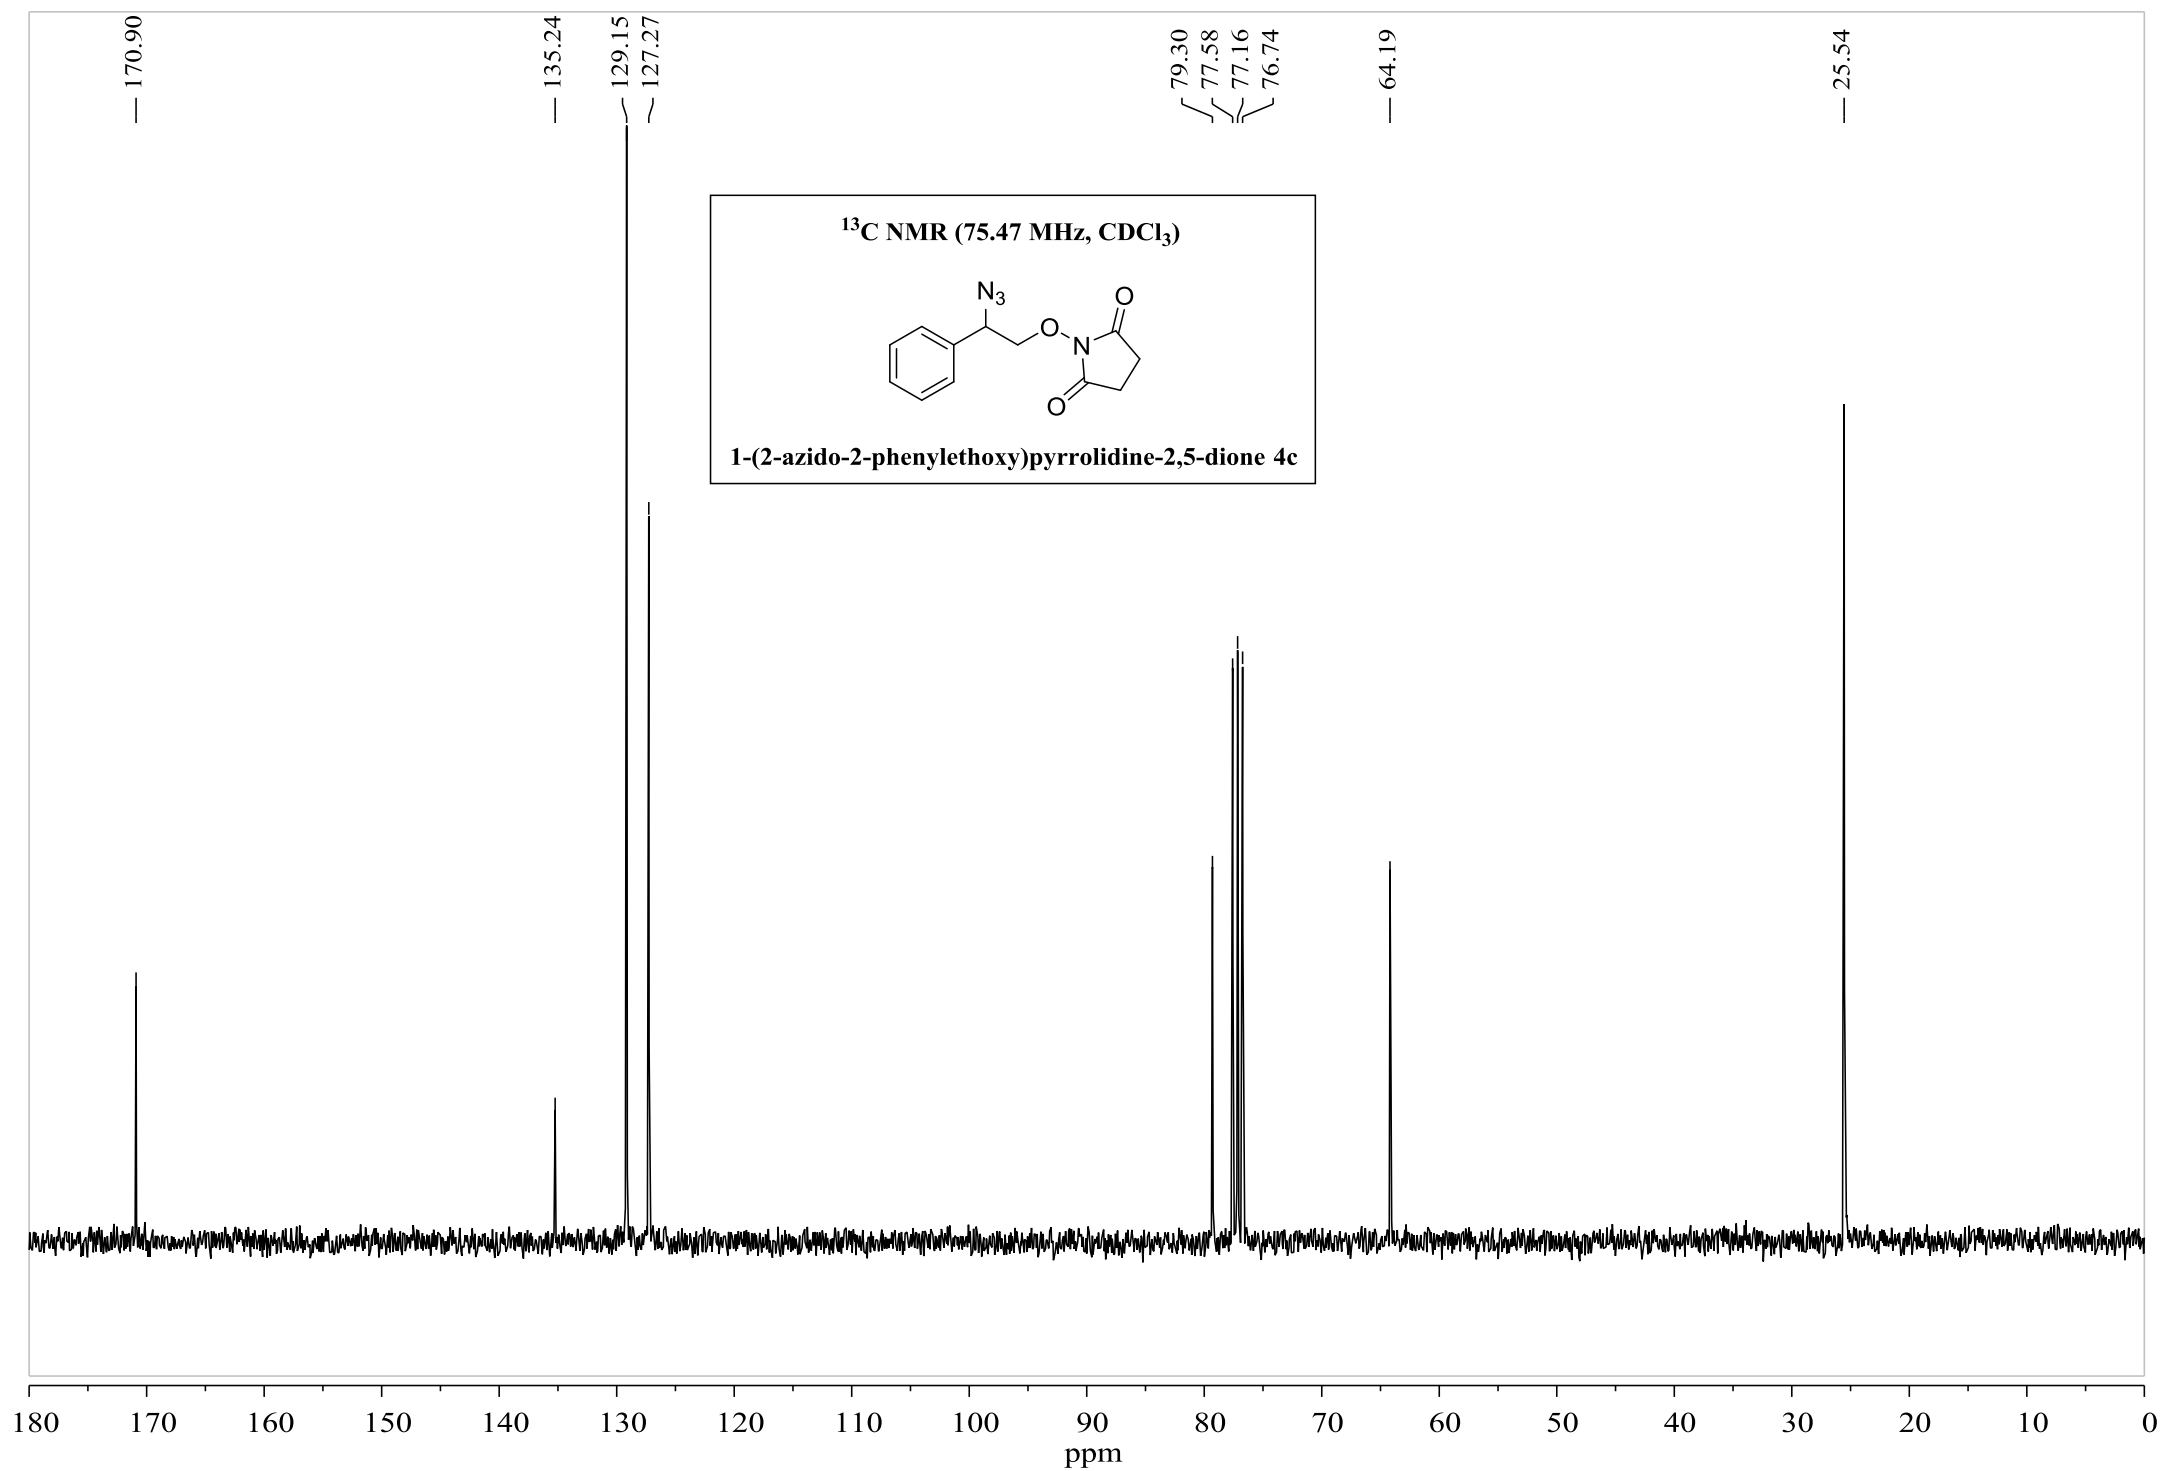

## Display Report

## Analysis Info

Analysis Name D:\Data\Kolotyrkina\2018\Pavel'ev\0321018.d  
Method tune\_low.m  
Sample Name /TERN NN-16  
Comment C17H14INO3 mH 408.0091 clb added

Acquisition Date 21.03.2018 17:43:26  
Operator BDAL@DE  
Instrument / Ser# micrOTOF 10248

## Acquisition Parameter

|             |            |                      |          |                  |           |
|-------------|------------|----------------------|----------|------------------|-----------|
| Source Type | ESI        | Ion Polarity         | Positive | Set Nebulizer    | 0.4 Bar   |
| Focus       | Not active |                      |          | Set Dry Heater   | 180 °C    |
| Scan Begin  | 50 m/z     | Set Capillary        | 4500 V   | Set Dry Gas      | 4.0 l/min |
| Scan End    | 3000 m/z   | Set End Plate Offset | -500 V   | Set Divert Valve | Waste     |

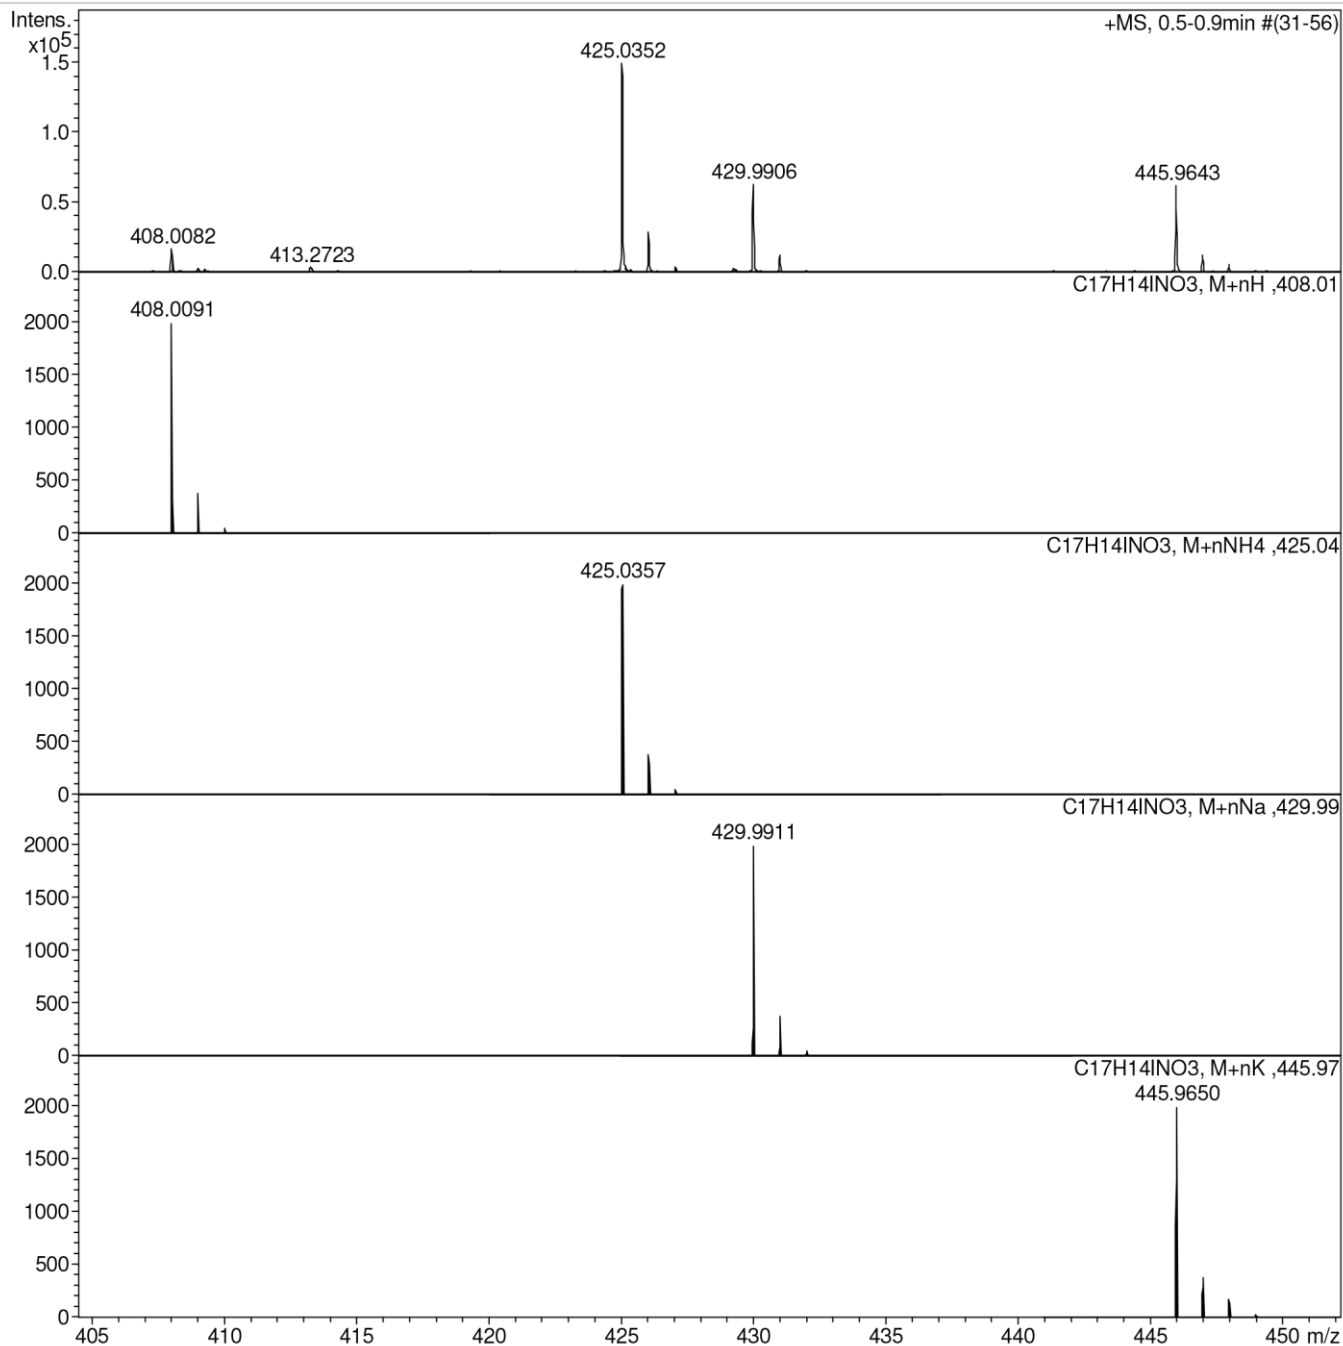

# HRMS (ESI) of 2-((1-iodo-1-phenylpropan-2-yl)oxy)isoindoline-1,3-dione 3ia

## Display Report

### Analysis Info

Analysis Name D:\Data\Kolotyrykina\2018\Pavel'ev\0321017.d  
Method tune\_low.m  
Sample Name /TERN C-800  
Comment C17H14INO3 mH 408.0091 clb added

Acquisition Date 21.03.2018 17:29:33

Operator BDAL@DE  
Instrument / Ser# microTOF 10248

### Acquisition Parameter

|             |            |                      |          |                  |           |
|-------------|------------|----------------------|----------|------------------|-----------|
| Source Type | ESI        | Ion Polarity         | Positive | Set Nebulizer    | 0.4 Bar   |
| Focus       | Not active |                      |          | Set Dry Heater   | 180 °C    |
| Scan Begin  | 50 m/z     | Set Capillary        | 4500 V   | Set Dry Gas      | 4.0 l/min |
| Scan End    | 3000 m/z   | Set End Plate Offset | -500 V   | Set Divert Valve | Waste     |

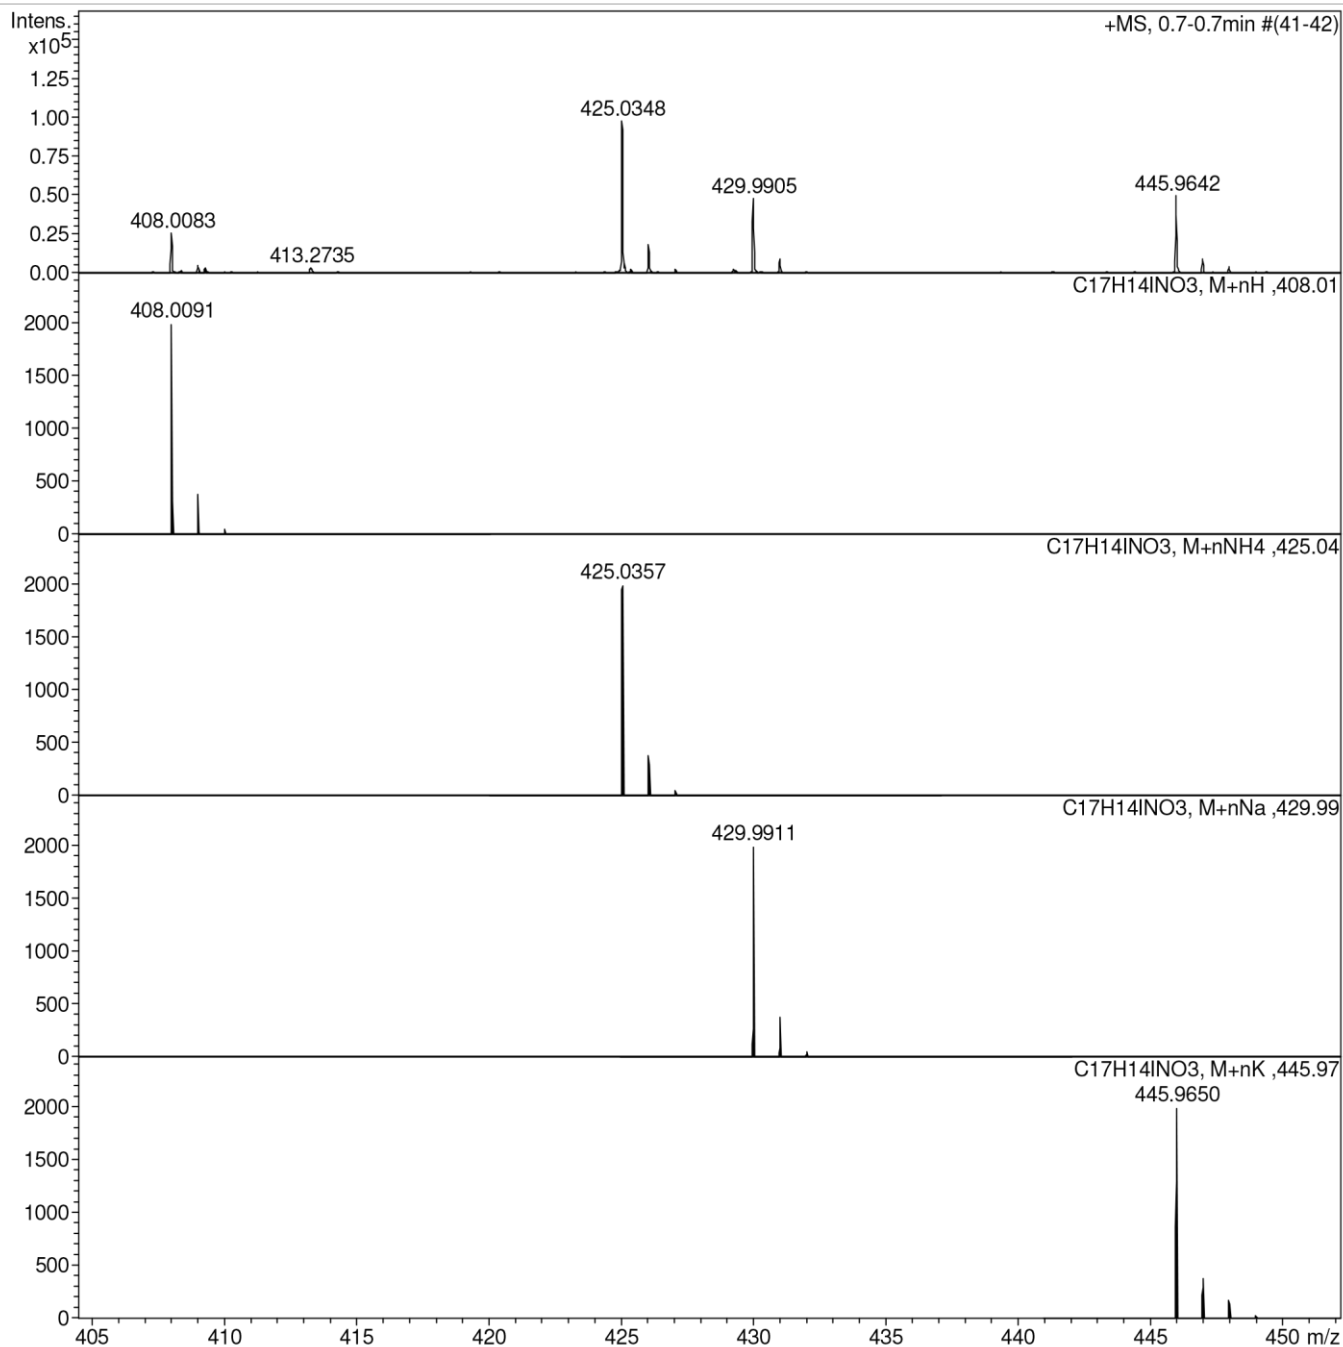

# HRMS (ESI) of 1-(2-(4-chlorophenyl)-2-iodoethoxy)pyrrolidine-2,5-dione 3cb

## Display Report

### Analysis Info

Analysis Name D:\Data\Kolotyrykina\2018\Pavel'ev\0321021.d  
Method tune\_low.m  
Sample Name /TERN NN-7  
Comment C12H11ClINO3 mH 379.9544 clb added

Acquisition Date 21.03.2018 17:59:24

Operator BDAL@DE  
Instrument / Ser# micrOTOF 10248

### Acquisition Parameter

|             |            |                      |          |                  |           |
|-------------|------------|----------------------|----------|------------------|-----------|
| Source Type | ESI        | Ion Polarity         | Positive | Set Nebulizer    | 0.4 Bar   |
| Focus       | Not active |                      |          | Set Dry Heater   | 180 °C    |
| Scan Begin  | 50 m/z     | Set Capillary        | 4500 V   | Set Dry Gas      | 4.0 l/min |
| Scan End    | 3000 m/z   | Set End Plate Offset | -500 V   | Set Divert Valve | Waste     |

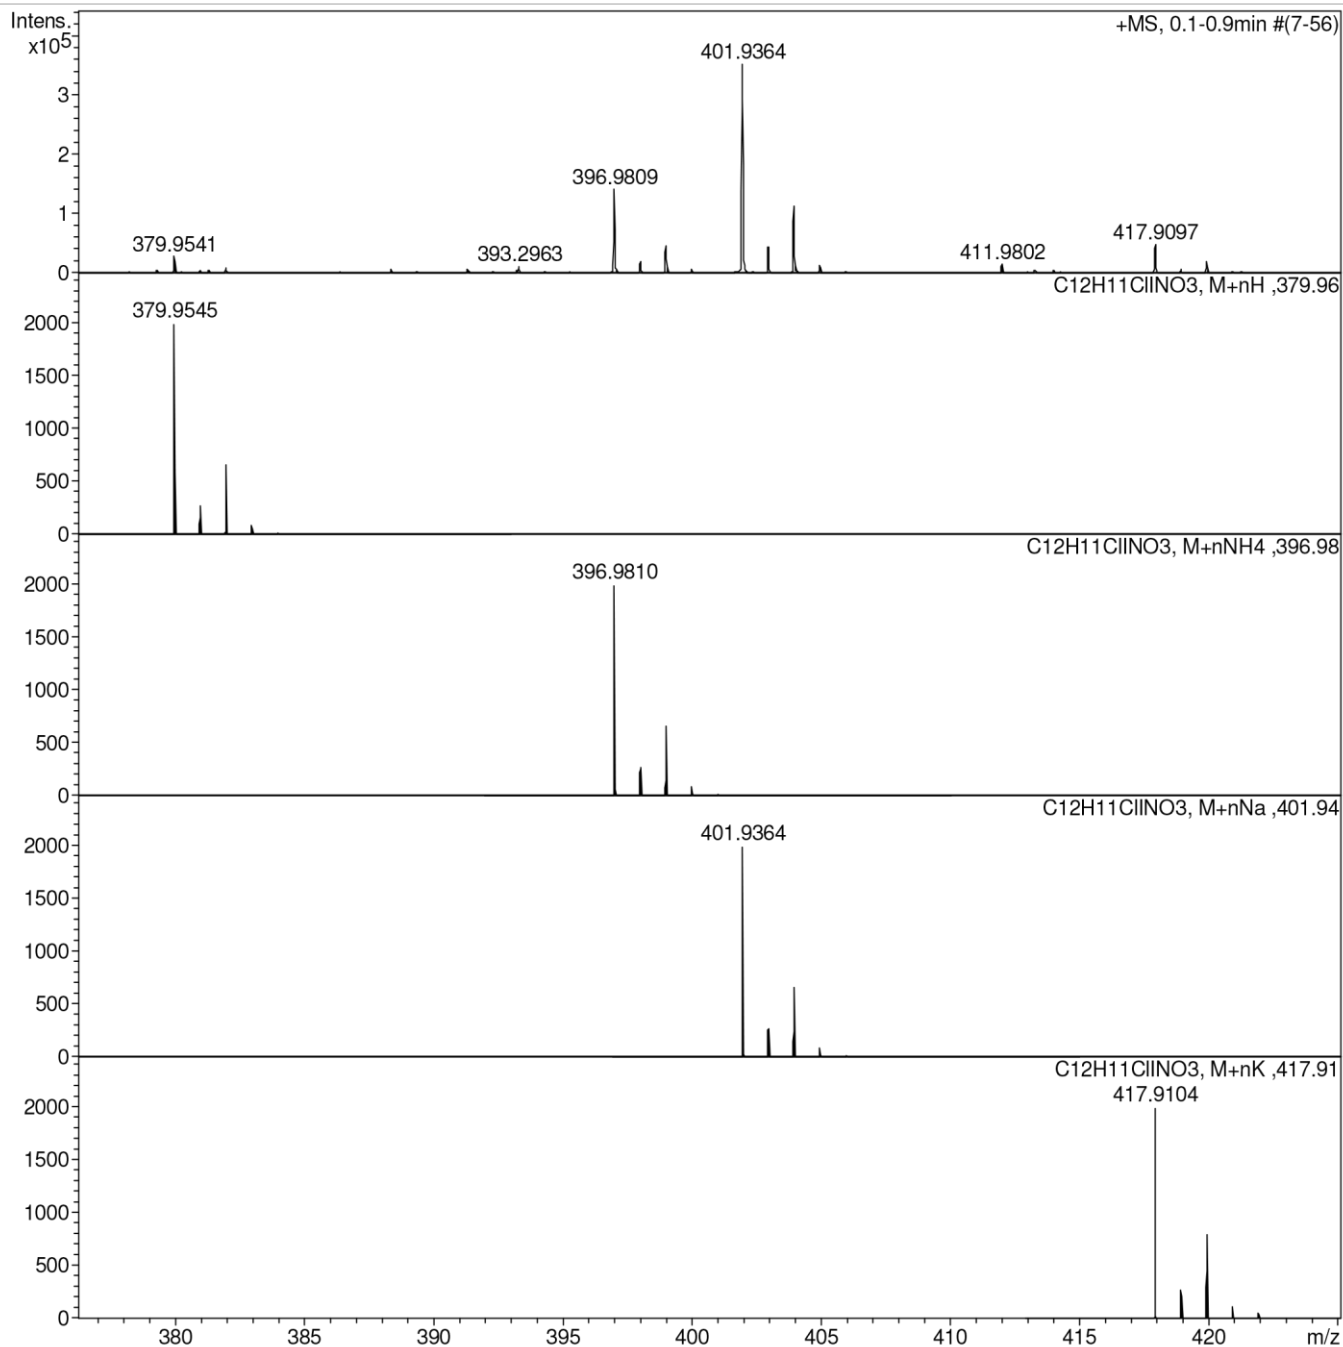

# HRMS (ESI) of 2-(2-methoxy-2-phenylethoxy)isoindoline-1,3-dione 4a

## Display Report

### Analysis Info

Analysis Name D:\Data\Kolotyrykina\2018\Pavel'ev\0515017.d  
 Method tune\_50-1600.m  
 Sample Name /TERN C891  
 Comment C17H15NO4 mH 298.1073 clb added

Acquisition Date 15.05.2018 17:14:10

Operator BDAL@DE  
 Instrument / Ser# microTOF 10248

### Acquisition Parameter

|             |            |                      |          |                  |           |
|-------------|------------|----------------------|----------|------------------|-----------|
| Source Type | ESI        | Ion Polarity         | Positive | Set Nebulizer    | 1.0 Bar   |
| Focus       | Not active |                      |          | Set Dry Heater   | 200 °C    |
| Scan Begin  | 50 m/z     | Set Capillary        | 4500 V   | Set Dry Gas      | 4.0 l/min |
| Scan End    | 1600 m/z   | Set End Plate Offset | -500 V   | Set Divert Valve | Waste     |

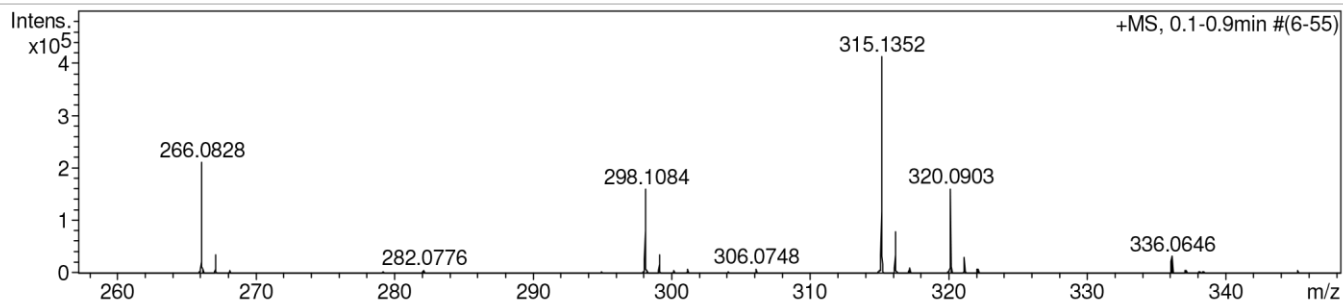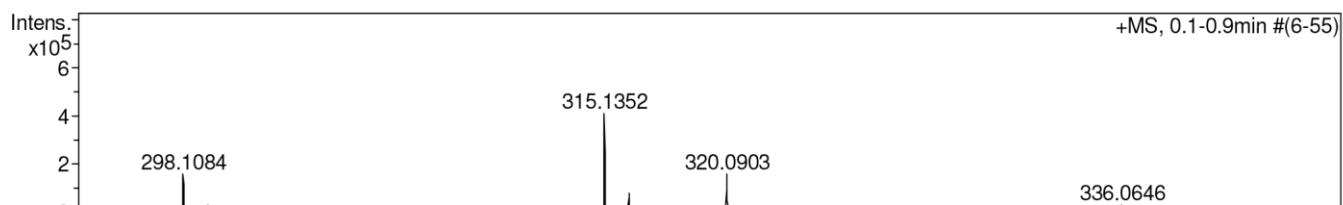

C17H15NO4, M+nH, 298.11

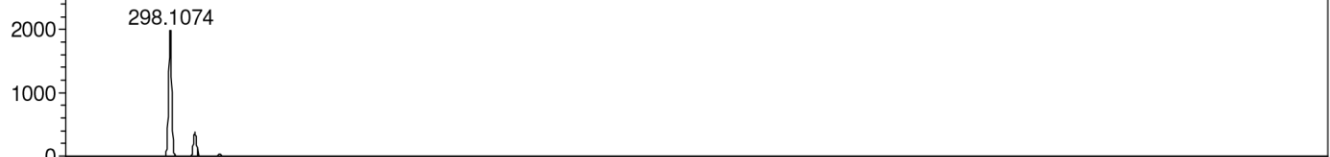

C17H15NO4, M+nNH4, 315.13

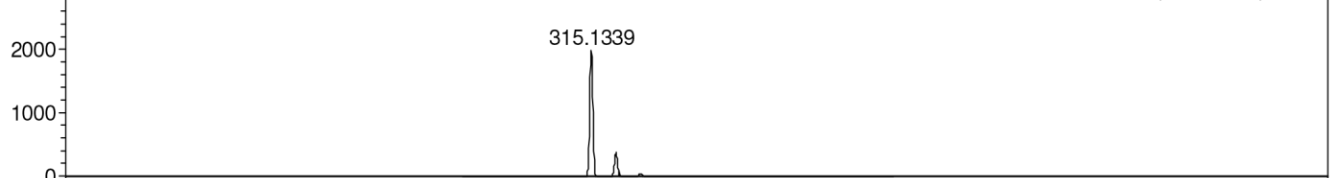

C17H15NO4, M+nNa, 320.09

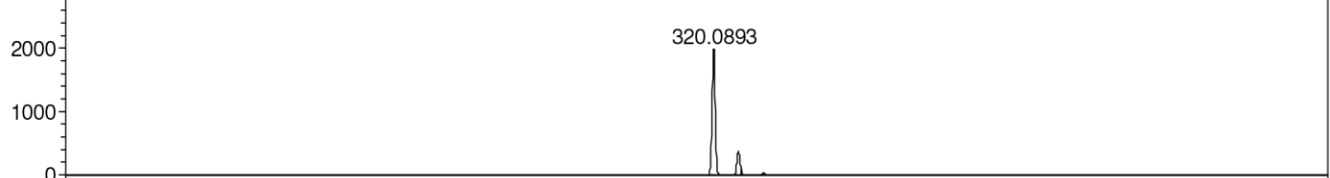

C17H15NO4, M+nK, 336.06

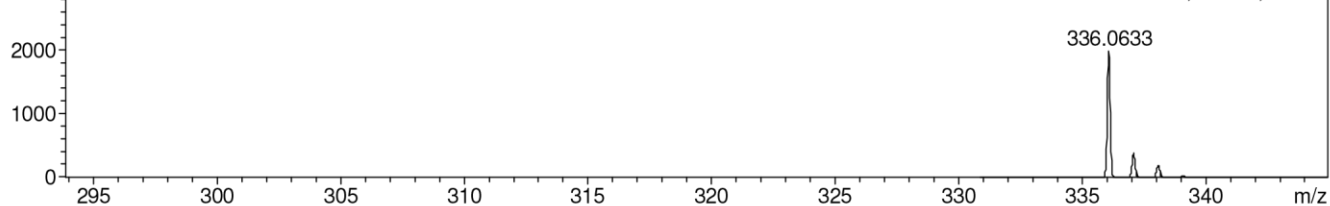



# HRMS (ESI) of (1-phenylethane-1,2-diyl-disulfonyl)dibenzene 4b

## Display Report

### Analysis Info

Analysis Name D:\Data\Chizhov\Terentiev\Paveliev\c-711\_&clblow.d  
 Method tune\_low.m  
 Sample Name /TERN C-711  
 Comment CH3CN 100 %, dil. 200, calibrant added

Acquisition Date 17.11.2017 17:41:57

Operator BDAL@DE  
 Instrument / Ser# microTOF 10248

### Acquisition Parameter

|             |            |                      |          |                  |           |
|-------------|------------|----------------------|----------|------------------|-----------|
| Source Type | ESI        | Ion Polarity         | Positive | Set Nebulizer    | 0.4 Bar   |
| Focus       | Not active |                      |          | Set Dry Heater   | 180 °C    |
| Scan Begin  | 50 m/z     | Set Capillary        | 4500 V   | Set Dry Gas      | 4.0 l/min |
| Scan End    | 3000 m/z   | Set End Plate Offset | -500 V   | Set Divert Valve | Waste     |

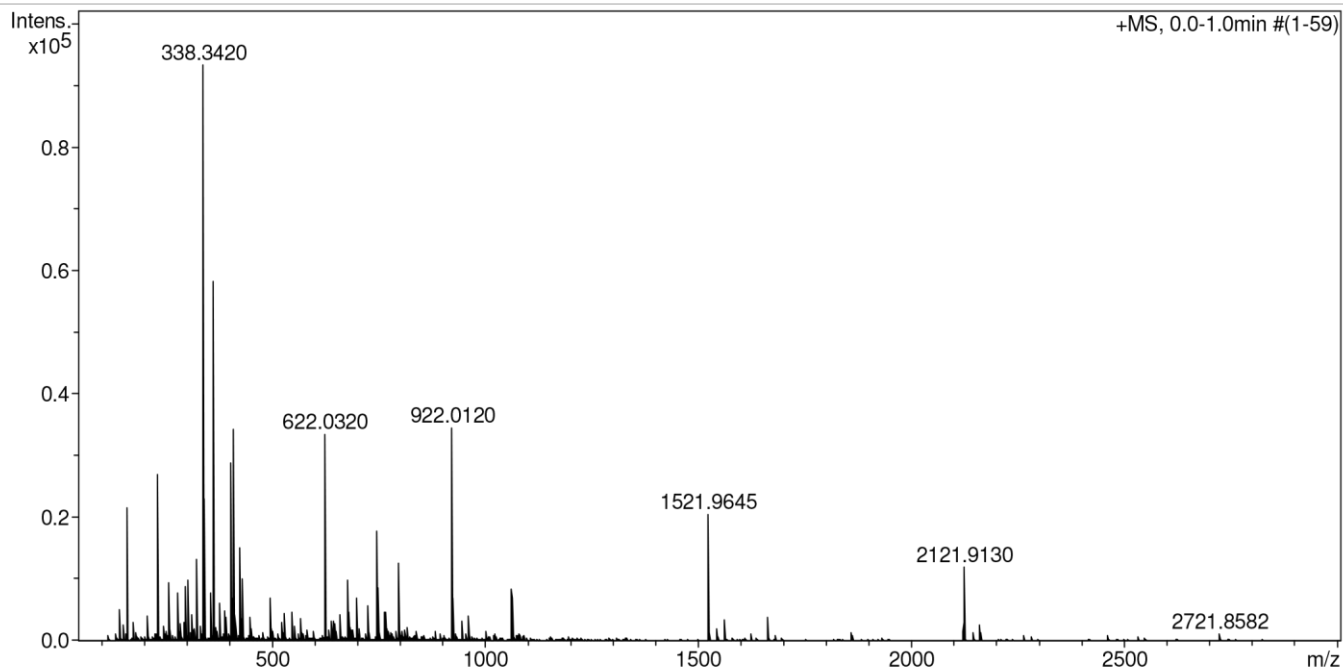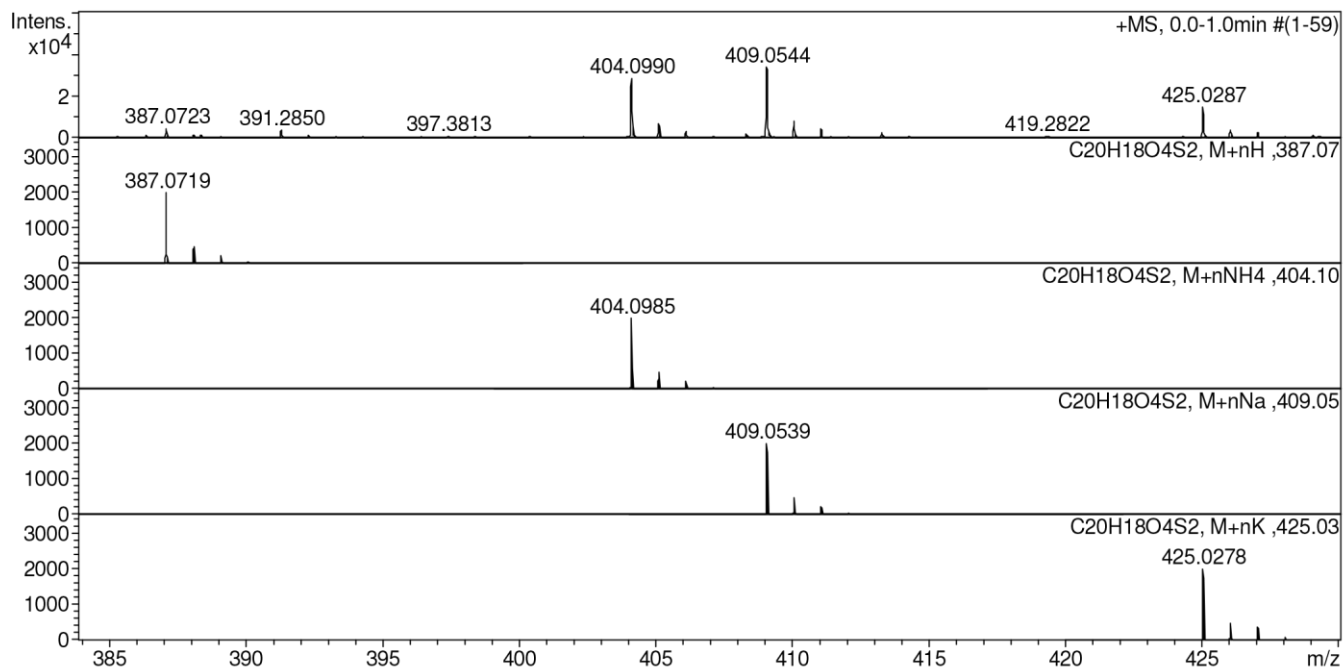

# 1-(2-azido-2-phenylethoxy)pyrrolidine-2,5-dione 4c

## Display Report

### Analysis Info

Analysis Name D:\Data\Kolotyrkina\2018\Pavel'ev\0517008.d  
Method tune\_50-1600.m  
Sample Name /TERN C889  
Comment C12H12N4O2 mH 261.0982 clb added

Acquisition Date 17.05.2018 10:28:44

Operator BDAL@DE  
Instrument / Ser# micrOTOF 10248

### Acquisition Parameter

|             |            |                      |          |                  |           |
|-------------|------------|----------------------|----------|------------------|-----------|
| Source Type | ESI        | Ion Polarity         | Positive | Set Nebulizer    | 1.0 Bar   |
| Focus       | Not active |                      |          | Set Dry Heater   | 200 °C    |
| Scan Begin  | 50 m/z     | Set Capillary        | 4500 V   | Set Dry Gas      | 4.0 l/min |
| Scan End    | 1600 m/z   | Set End Plate Offset | -500 V   | Set Divert Valve | Waste     |

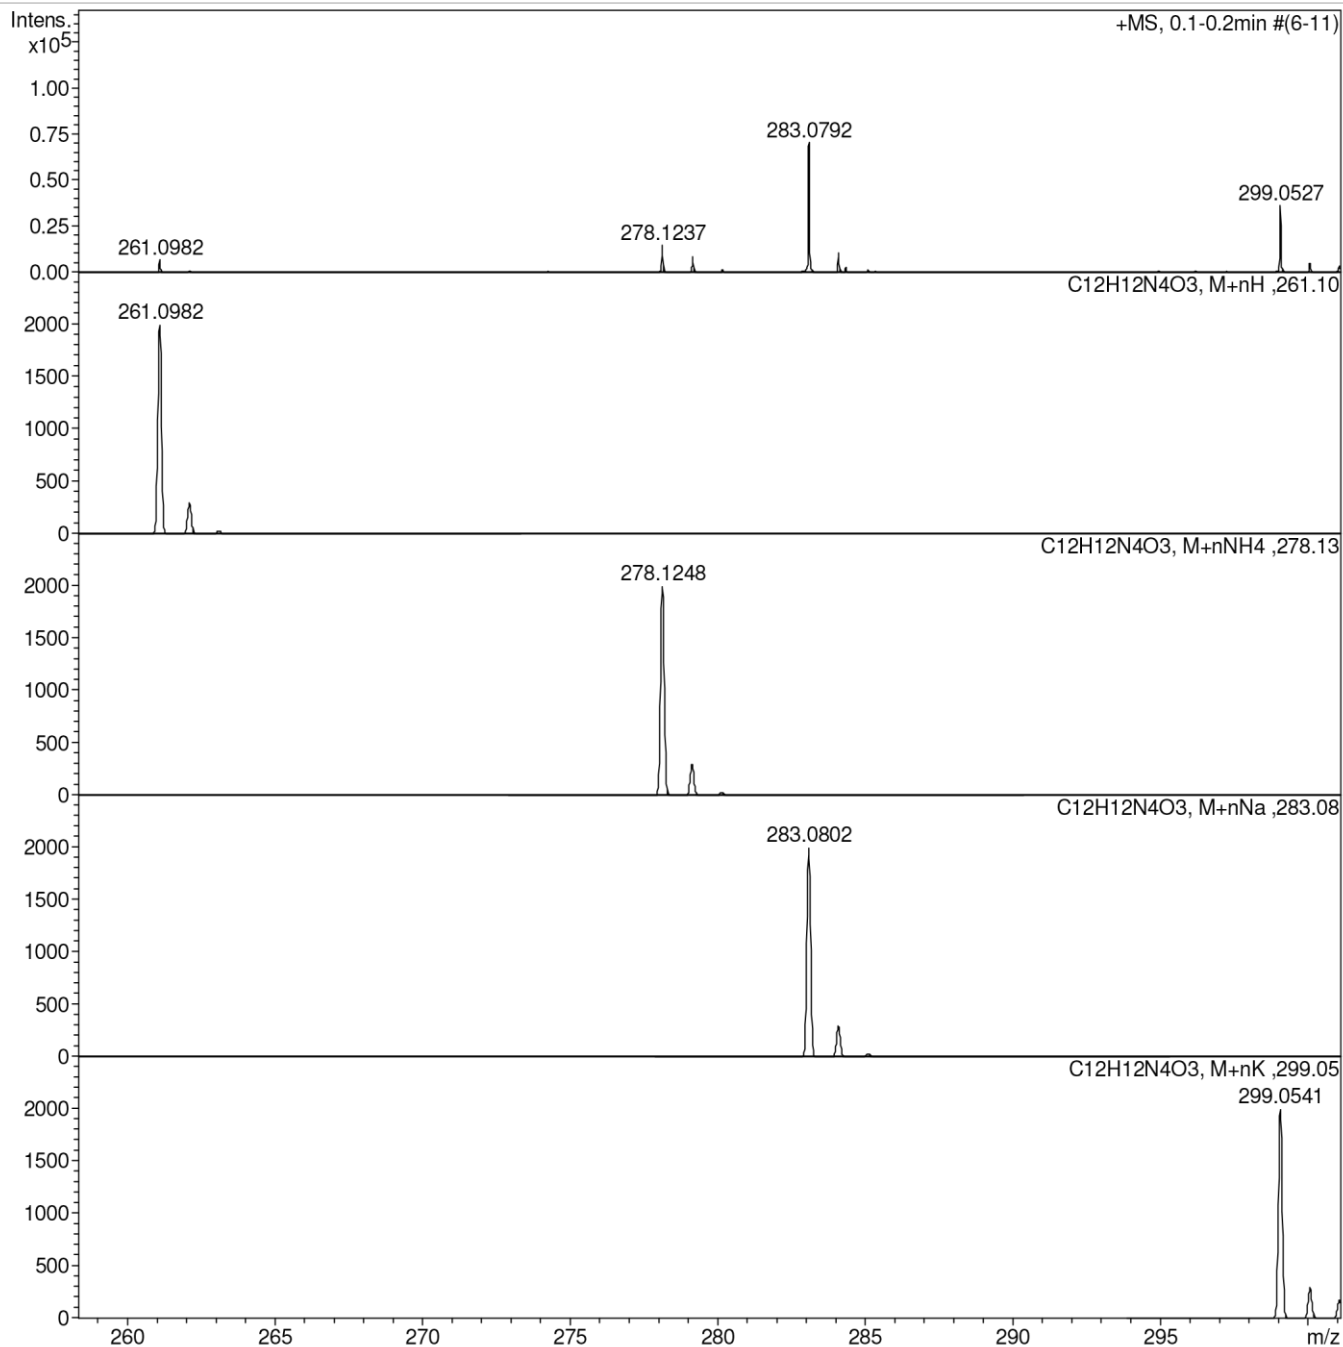

FT-IR spectrum of 2-(2-iodo-2-phenylethoxy)isoindoline-1,3-dione 3aa

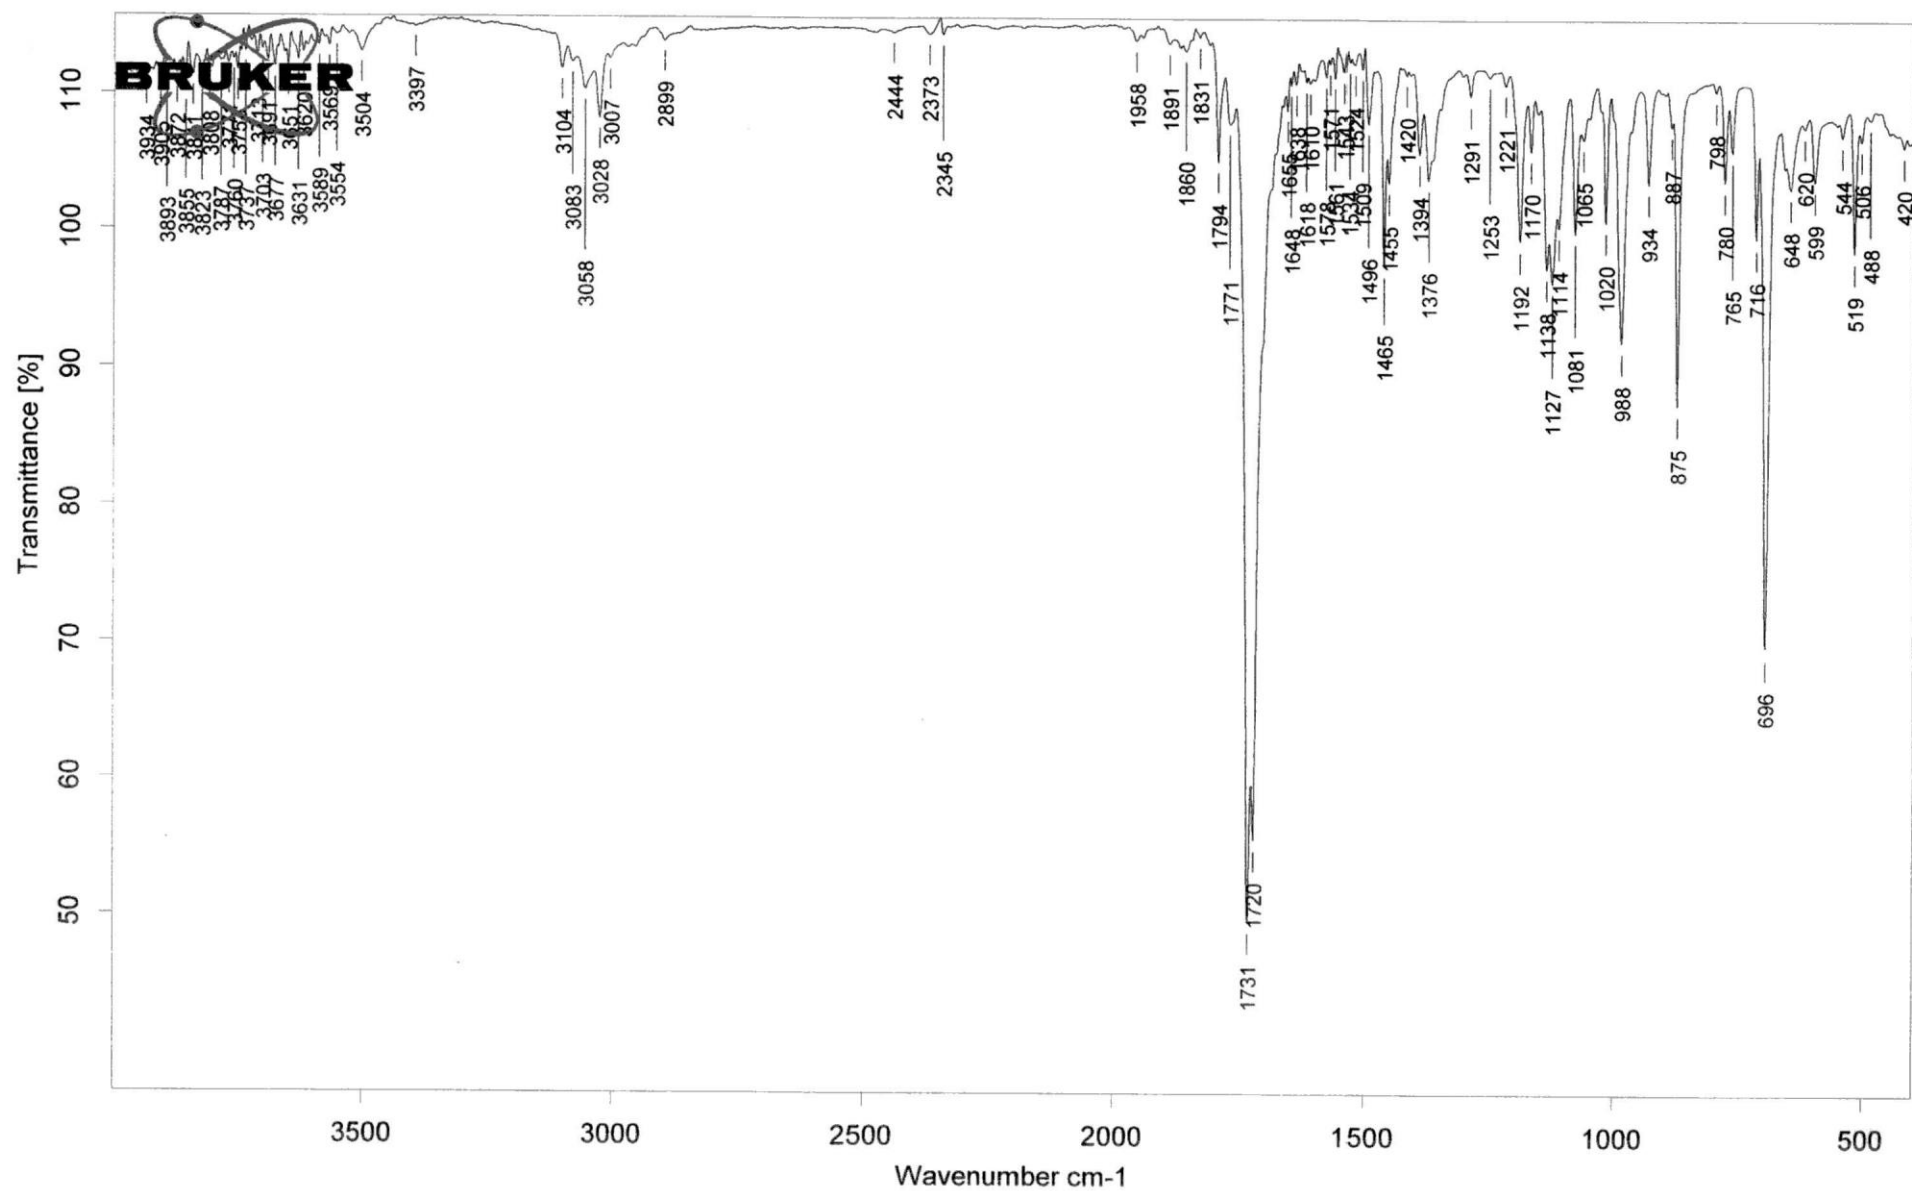

FT-IR (KBr pellet) spectrum of 2-(2-iodo-2-(*p*-tolyl)ethoxy)isoindoline-1,3-dione (mixture of regioisomers 4:1) 3ba

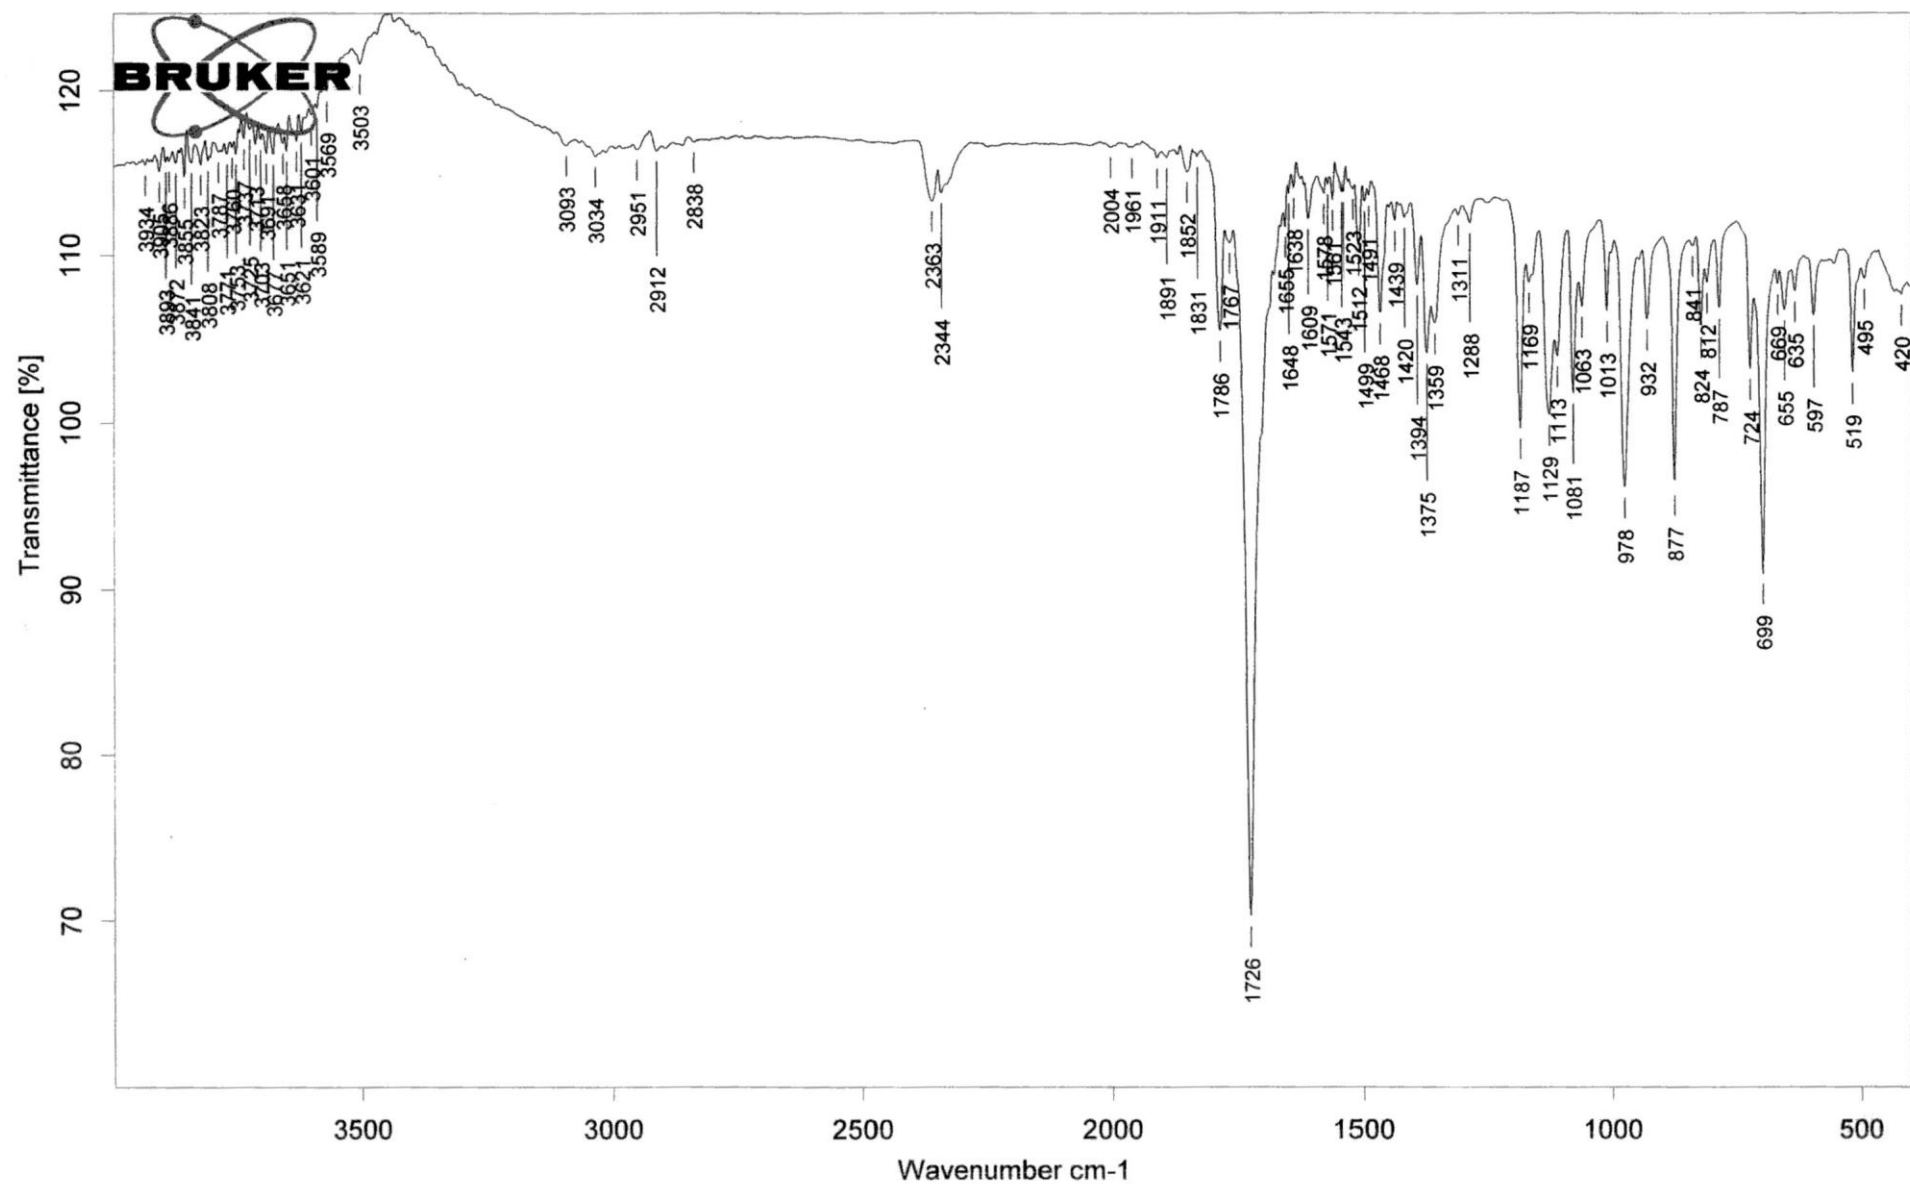

FT-IR (KBr pellet) spectrum of 2-(2-(4-chlorophenyl)-2-iodoethoxy)isoindoline-1,3-dione 3ca

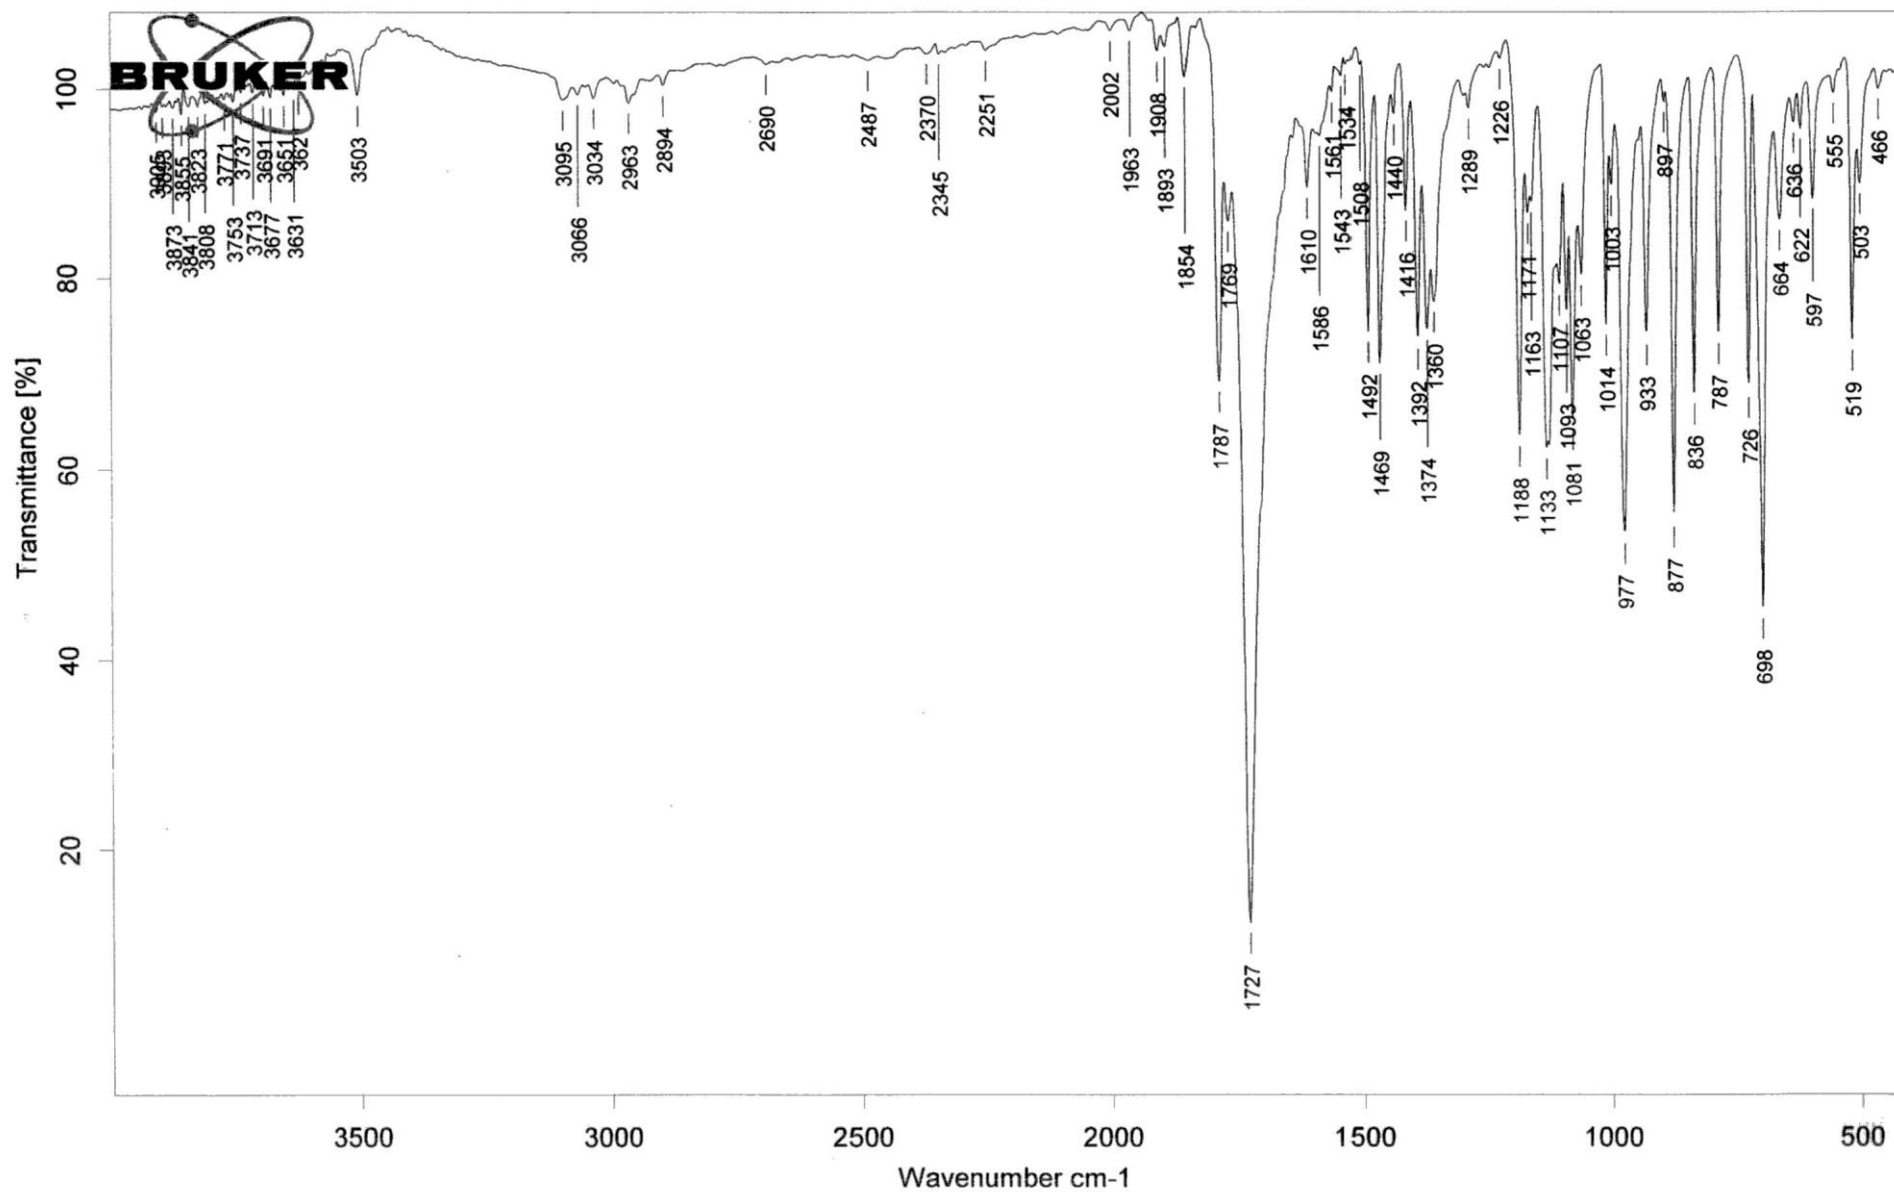

FT-IR (KBr pellet) spectrum of 2-(2-(4-fluorophenyl)-2-iodoethoxy)isoindoline-1,3-dione 3da

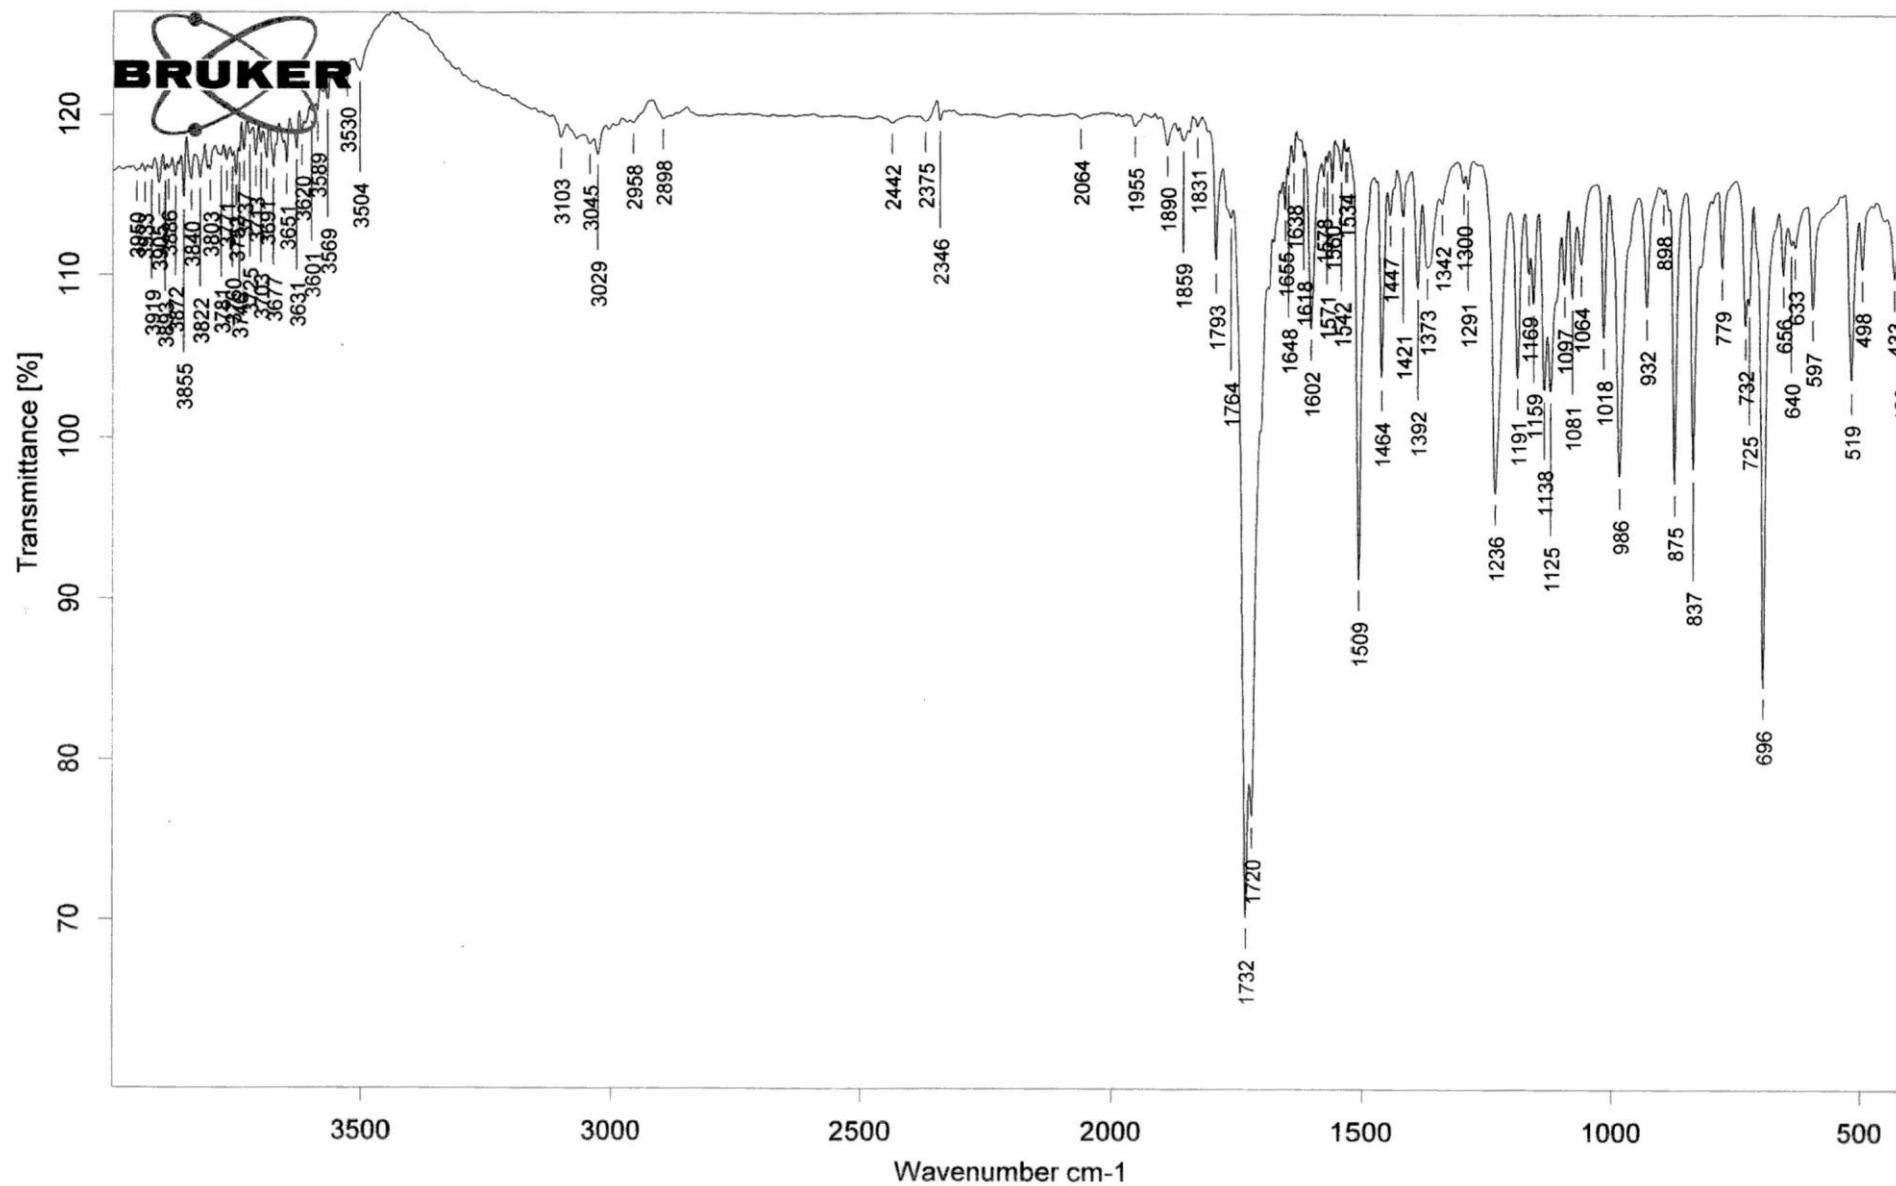

FT-IR (KBr pellet) spectrum of 2-(2-iodo-2-(*m*-tolyl)ethoxy)isoindoline-1,3-dione 3ea

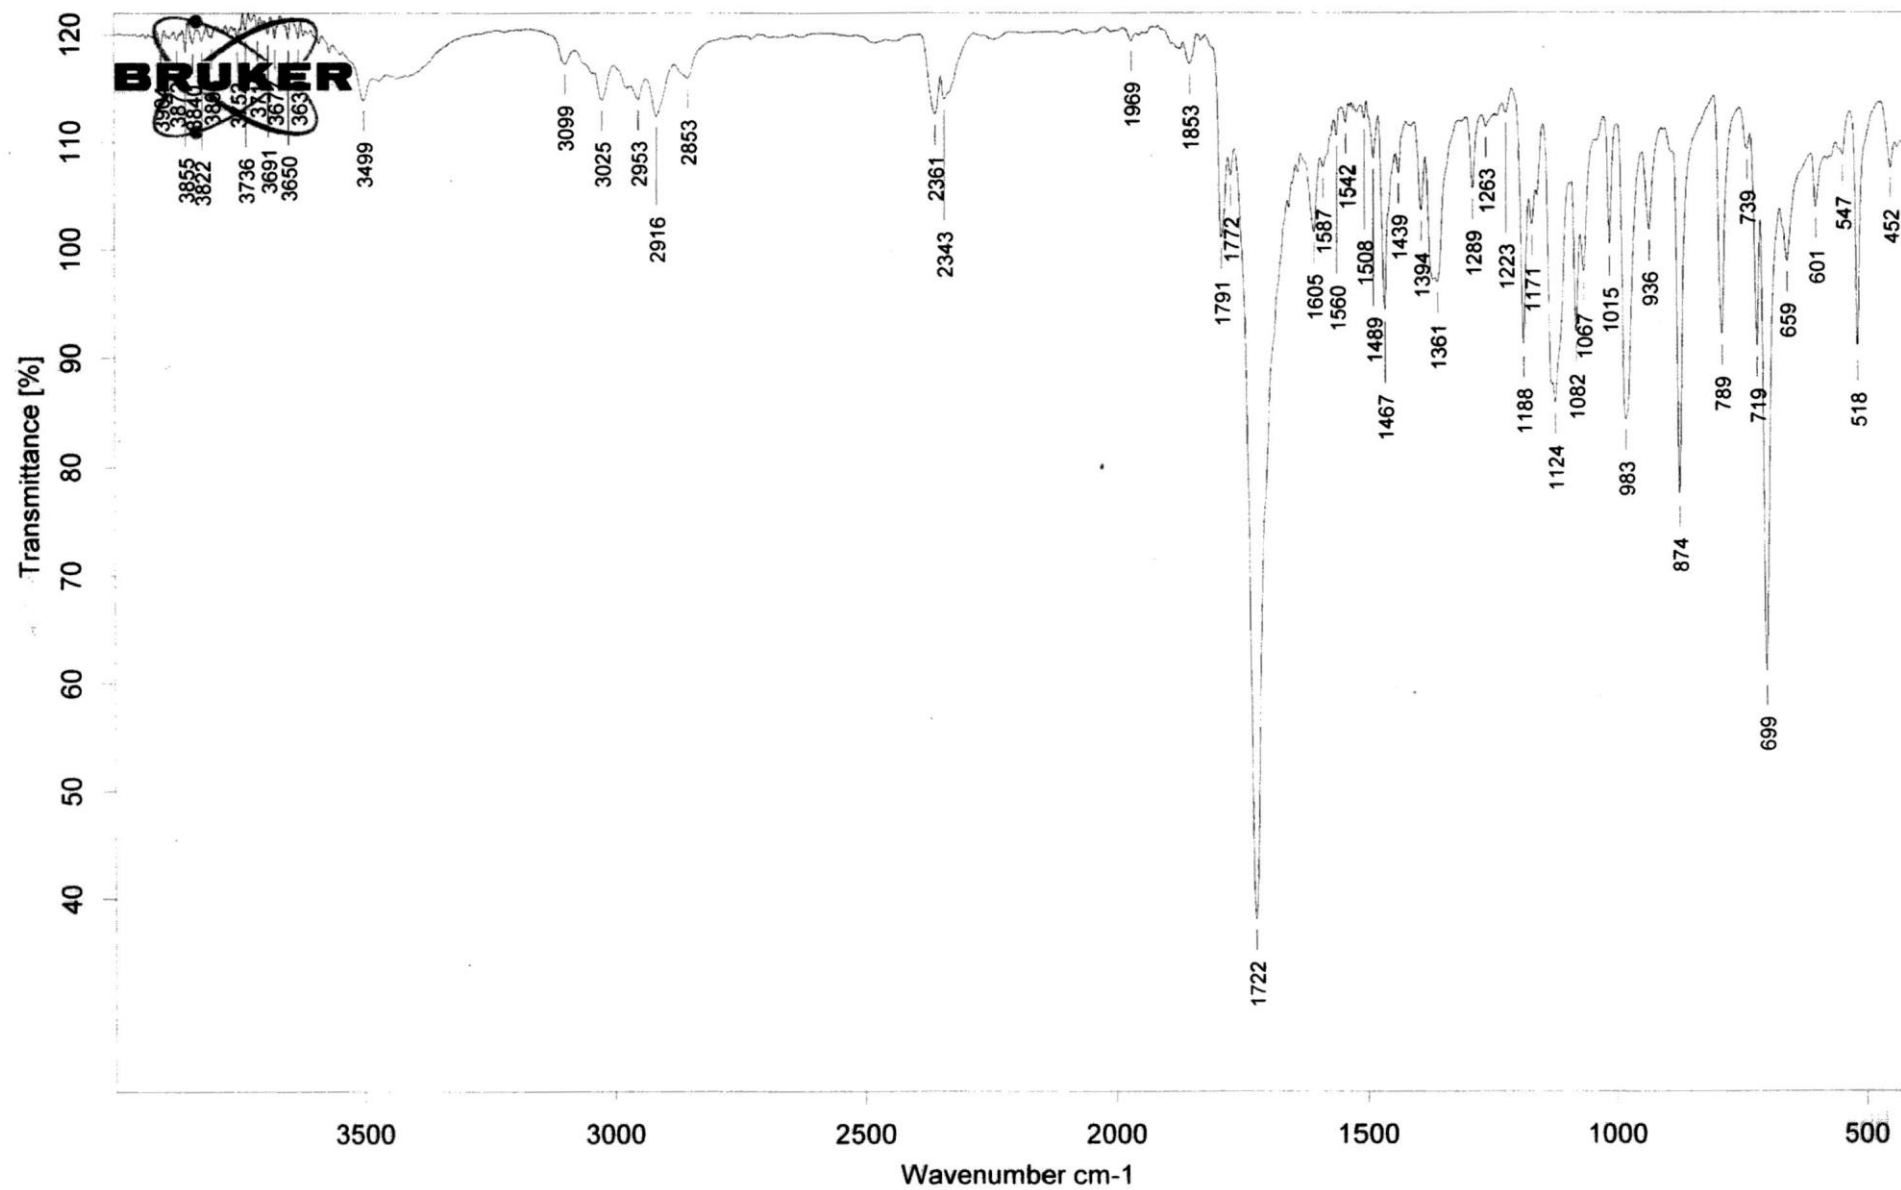

FT-IR (KBr pellet) spectrum of 2-(2-(3-bromophenyl)-2-iodoethoxy)isoindoline-1,3-dione 3fa

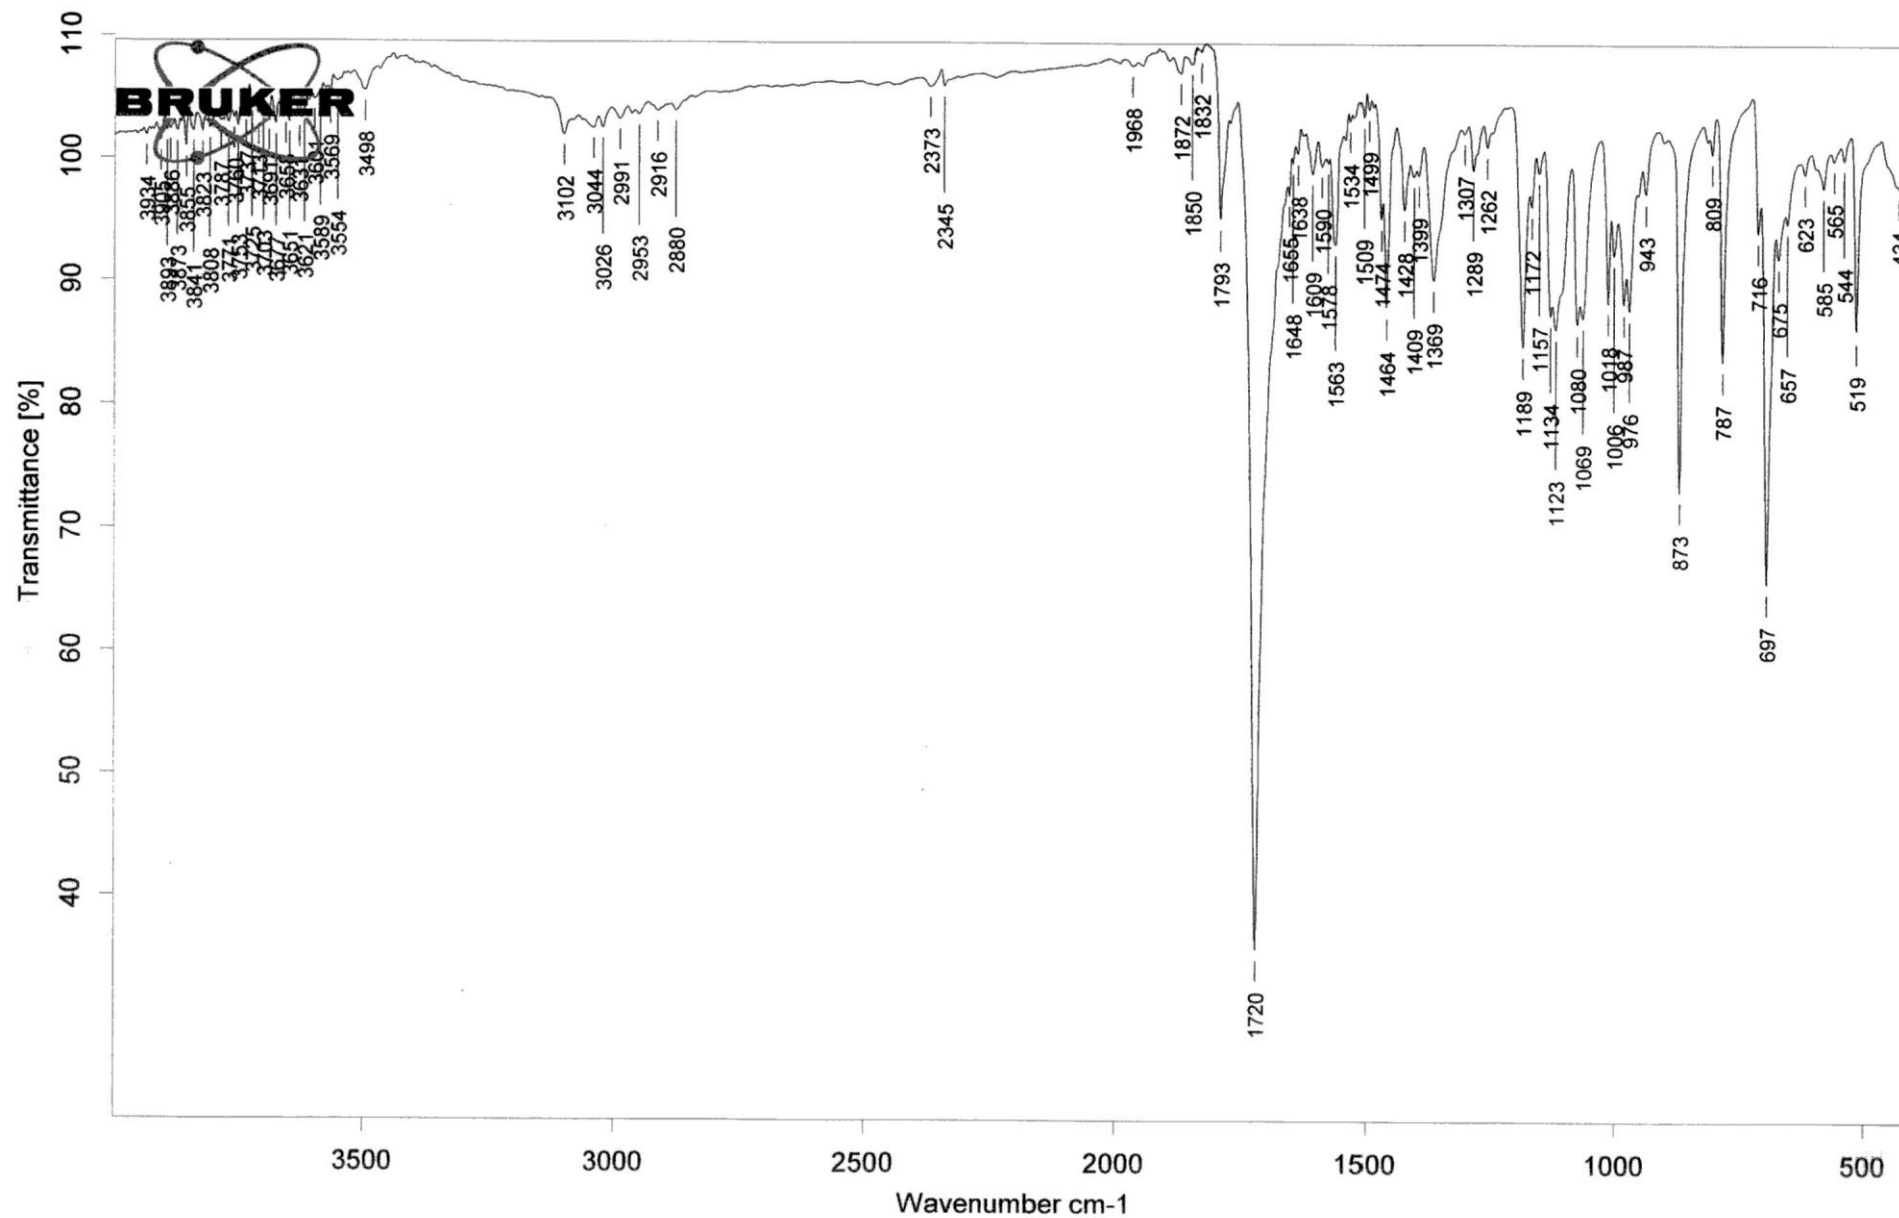



FT-IR (KBr pellet) spectrum of 2-(2-iodo-2-(*o*-tolyl)ethoxy)isoindoline-1,3-dione 3ga

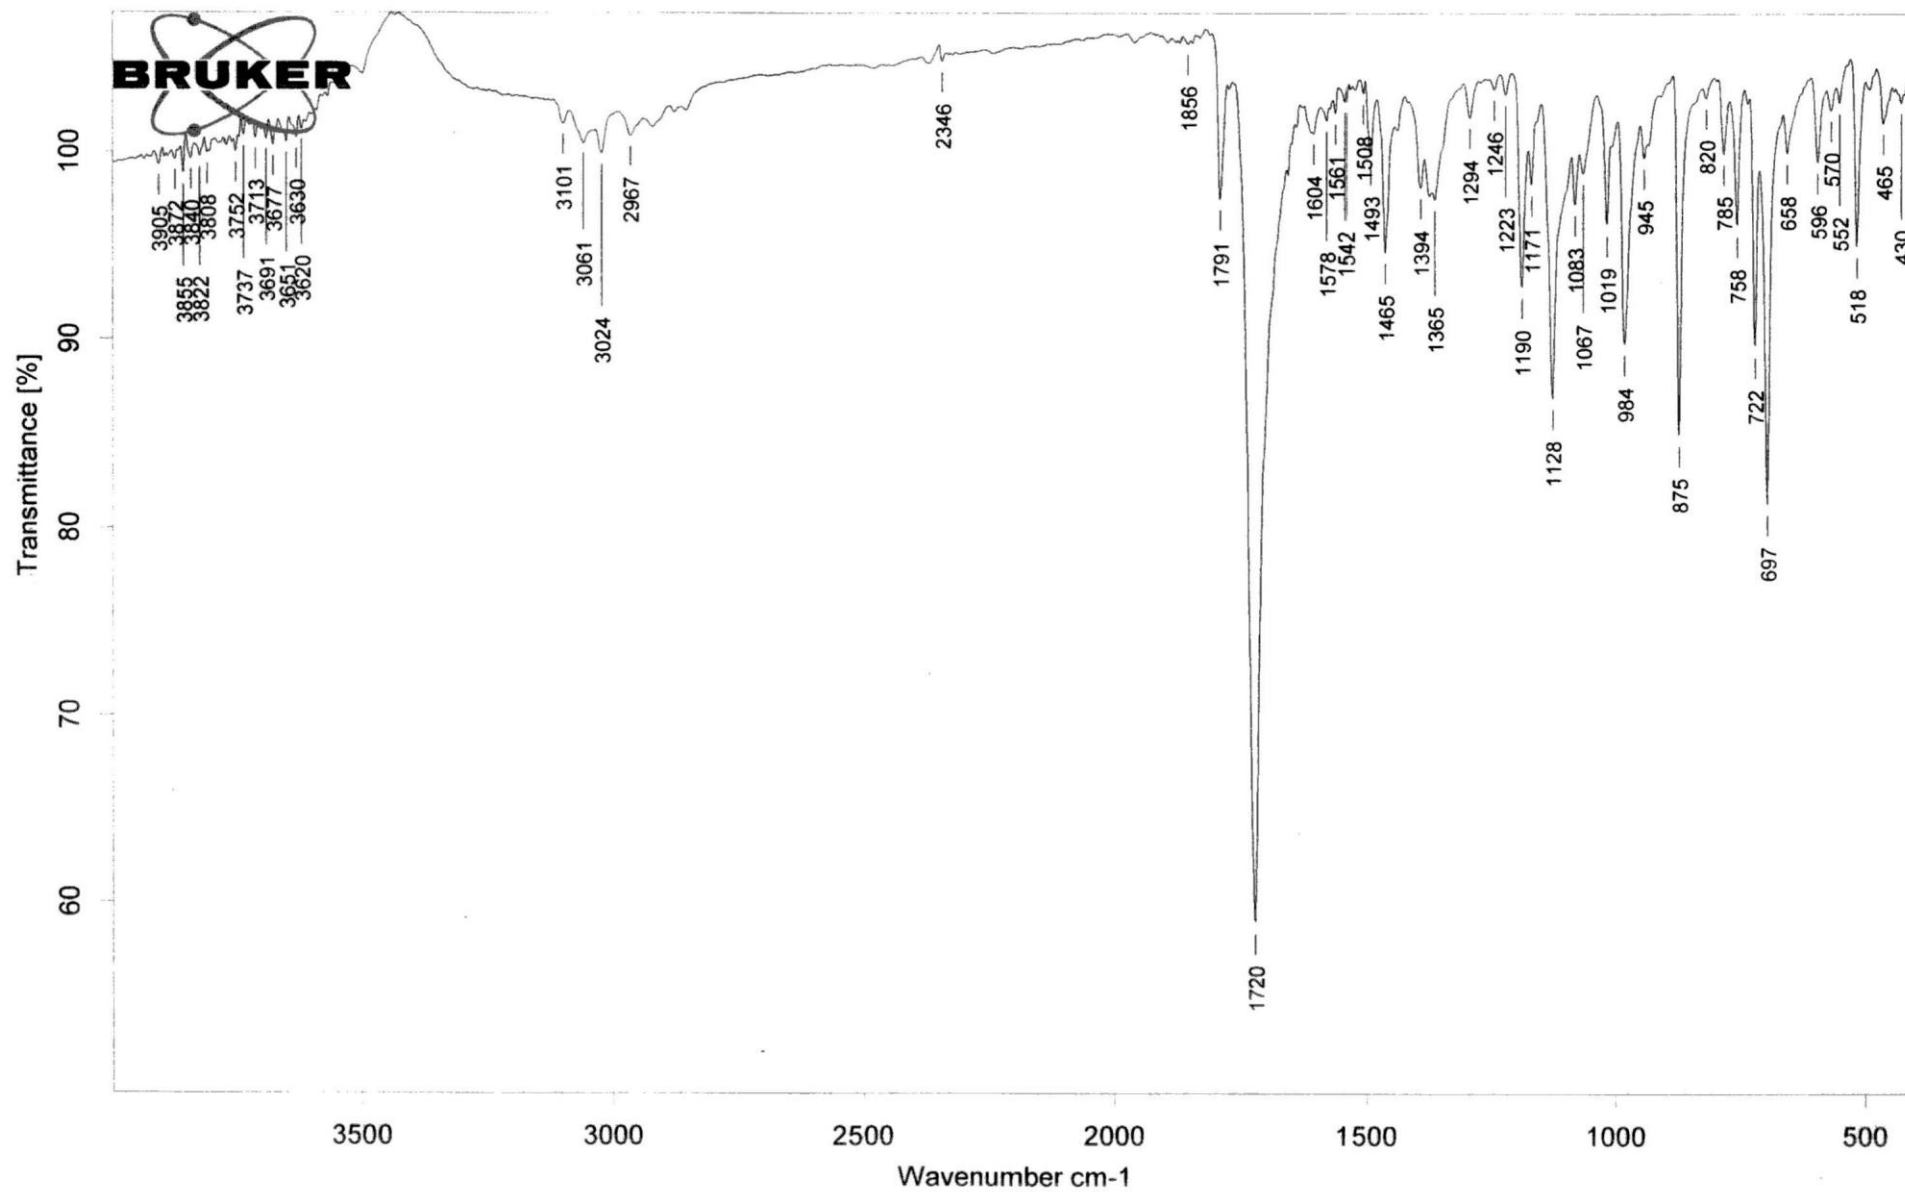

FT-IR (KBr pellet) spectrum of 2-(2-iodo-2-(perfluorophenyl)ethoxy)isoindoline-1,3-dione 3ha

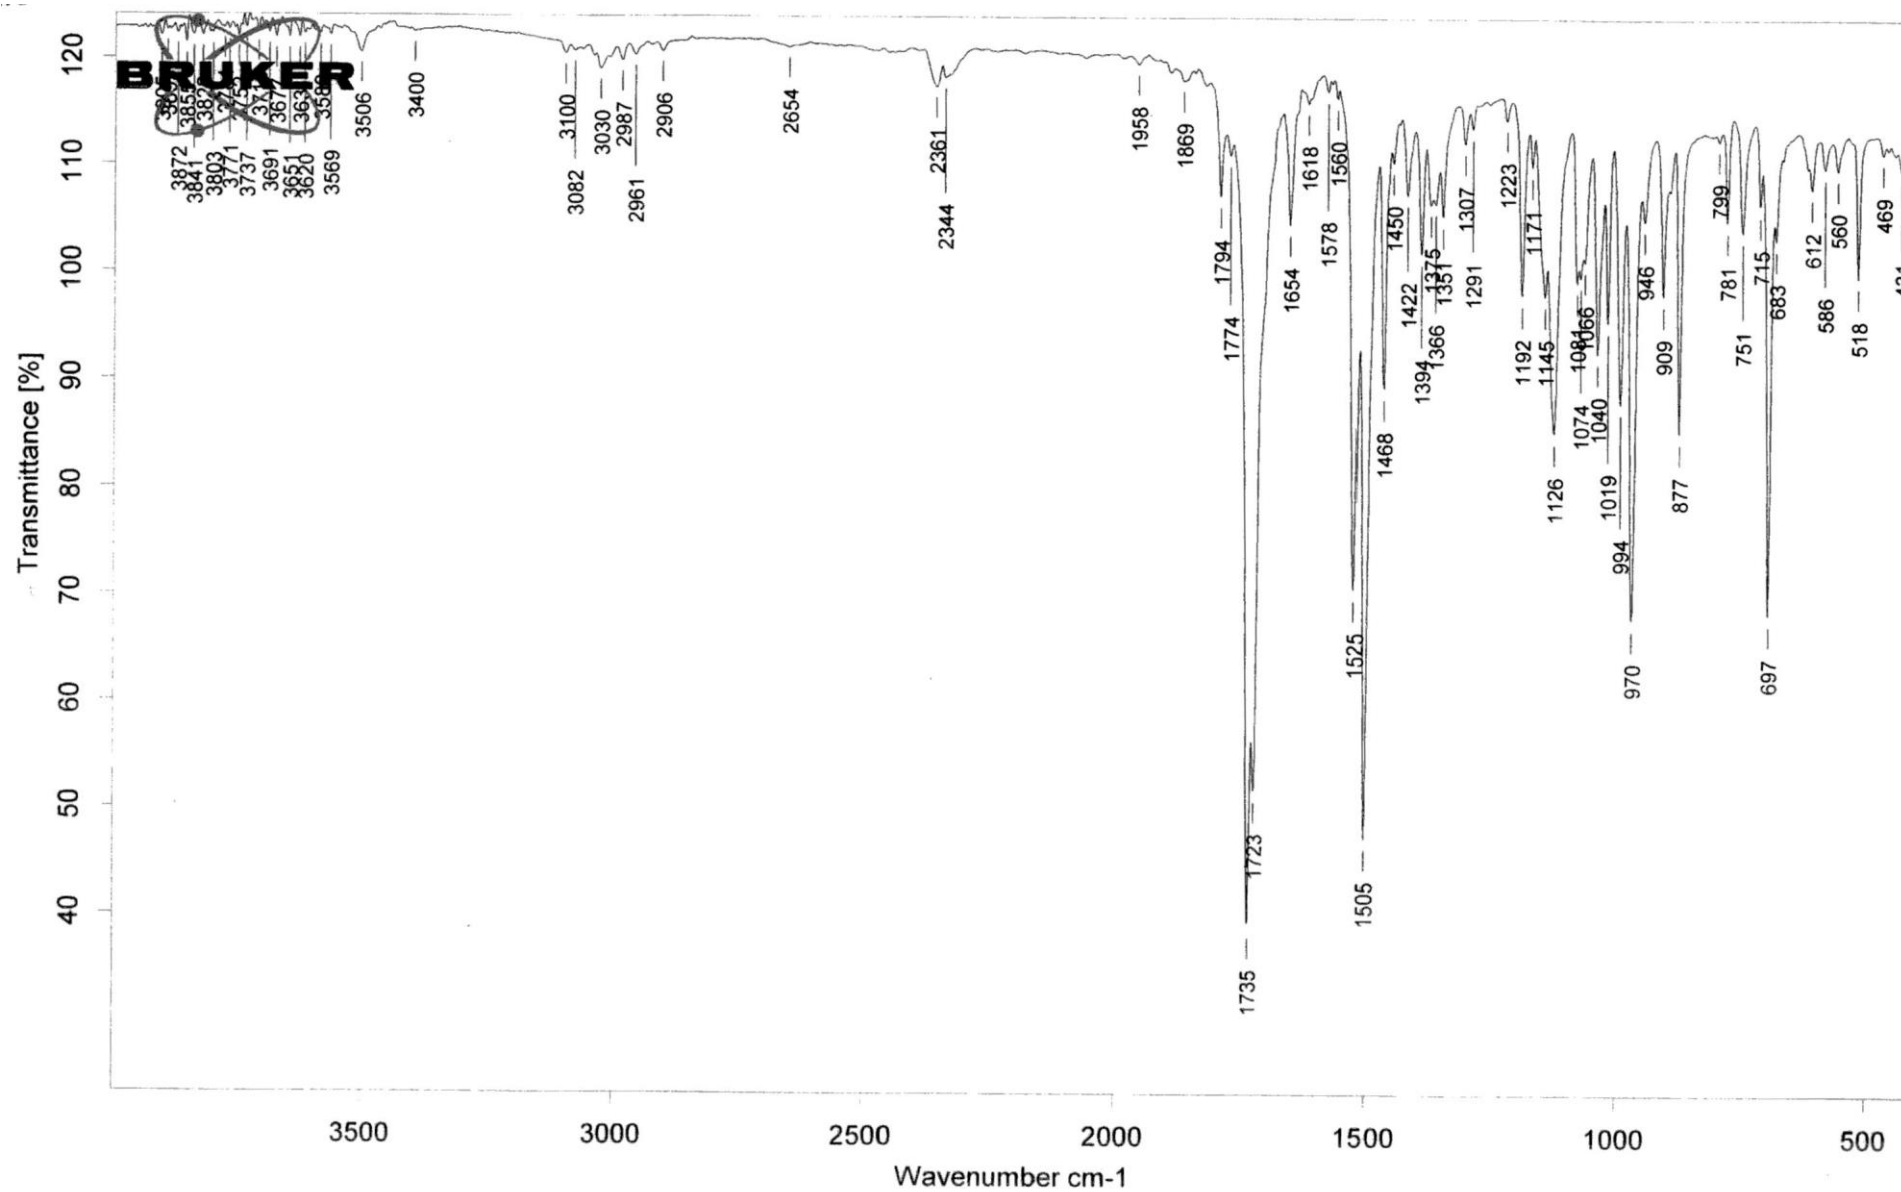

FT-IR (KBr pellet) spectrum of 2-((1-iodo-1-phenylpropan-2-yl)oxy)isoindoline-1,3-dione **3ia**

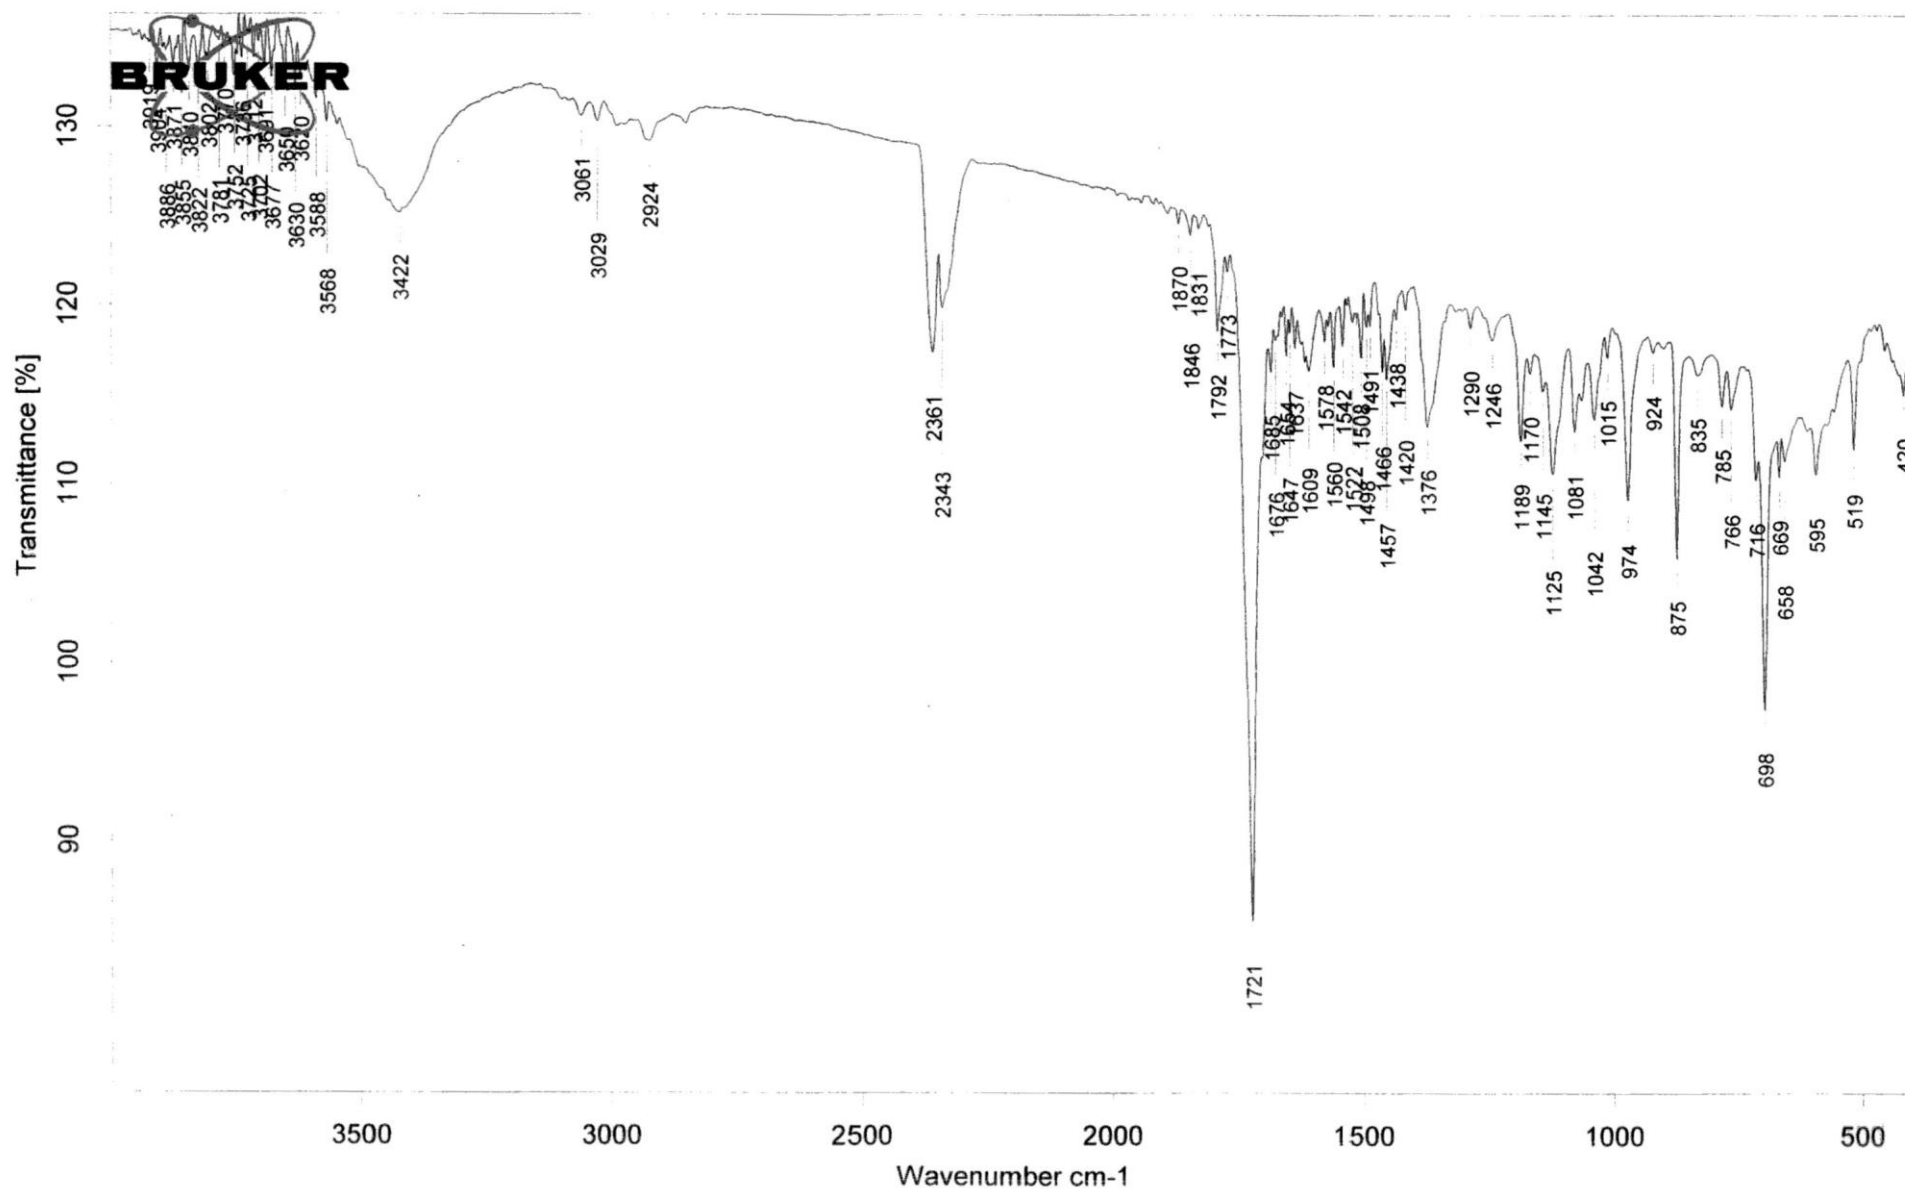

FT-IR (KBr pellet) spectrum of 2-(2-iodo-1,2-diphenylethoxy)isoindoline-1,3-dione 3ja

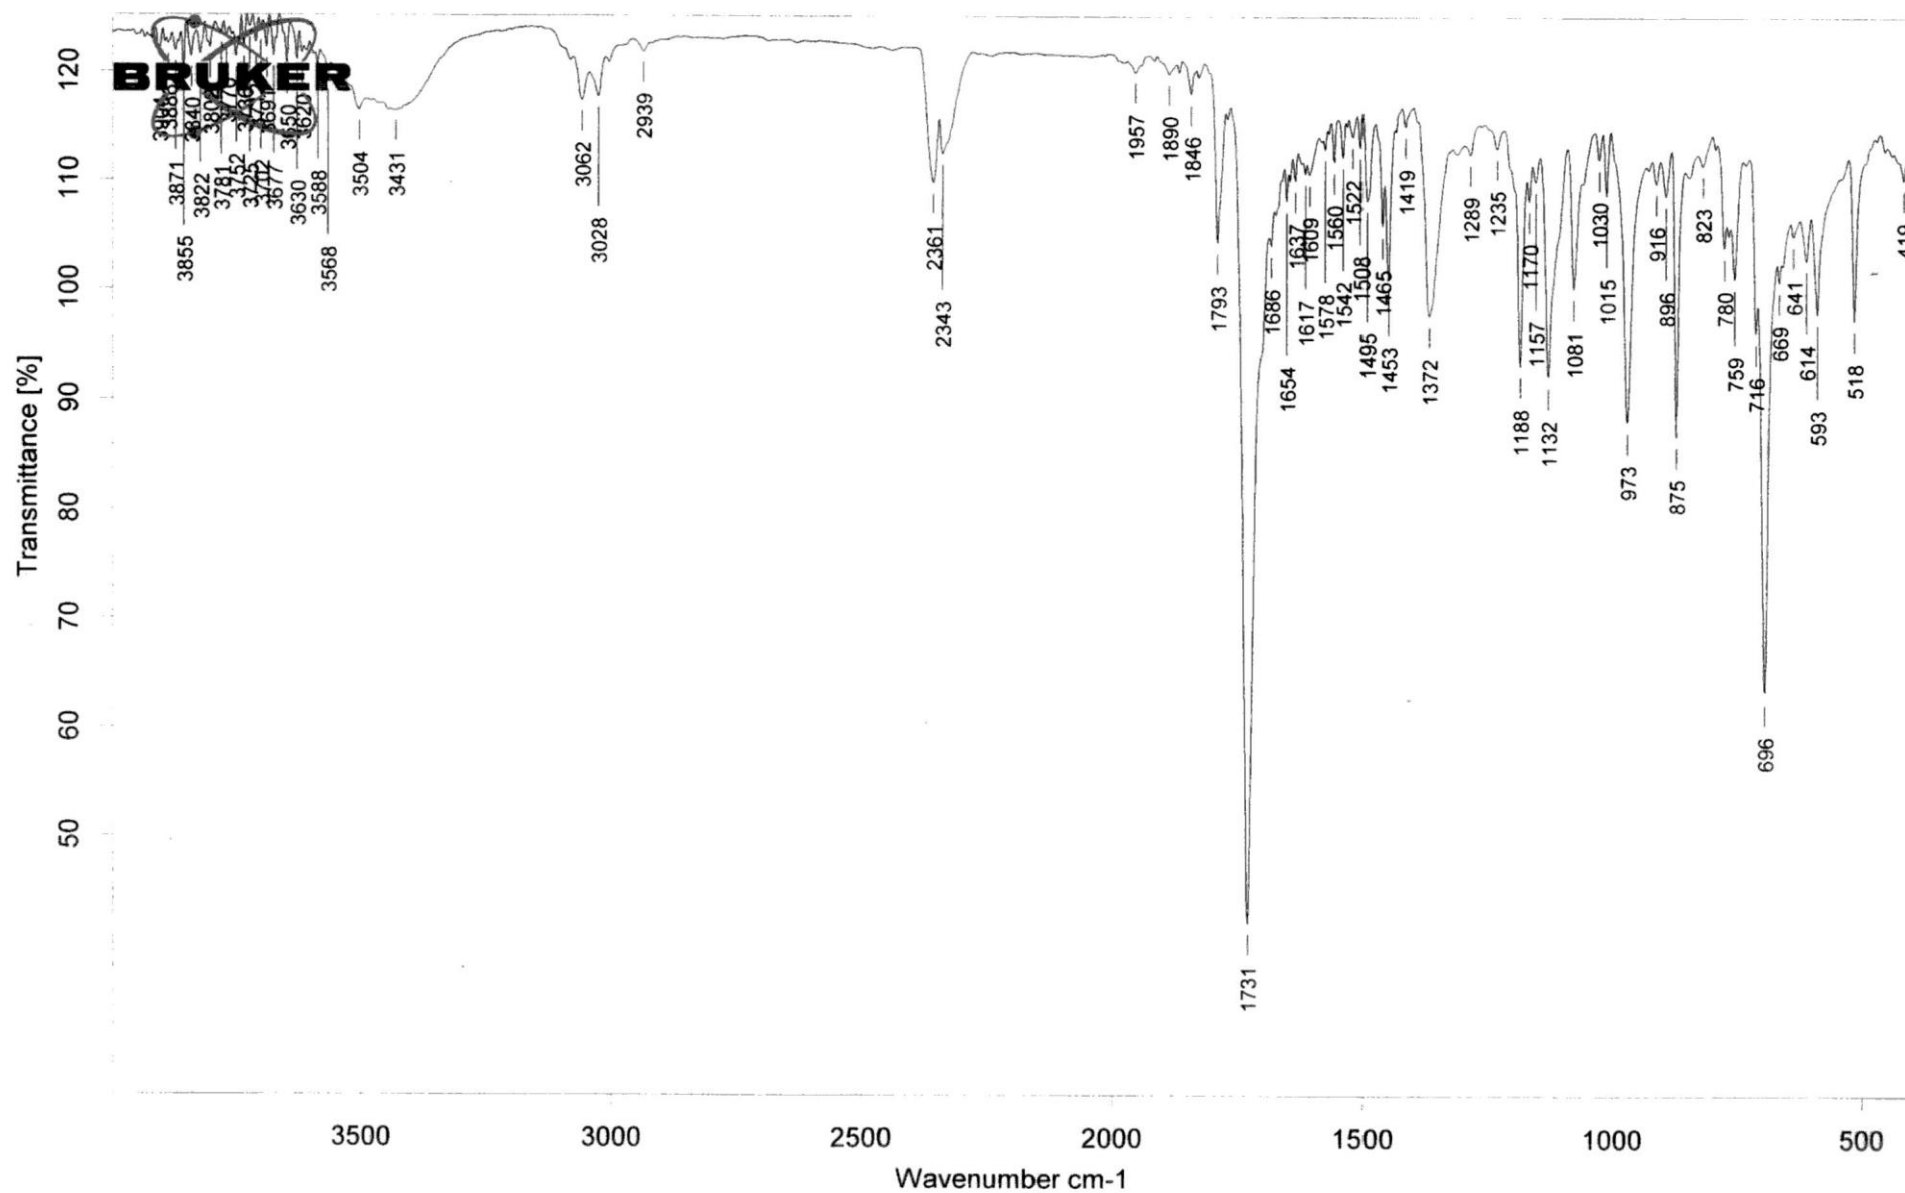

FT-IR (KBr pellet) spectrum of 2-((1-iodo-2,3-dihydro-1H-inden-2-yl)oxy)isoindoline-1,3-dione 3ka

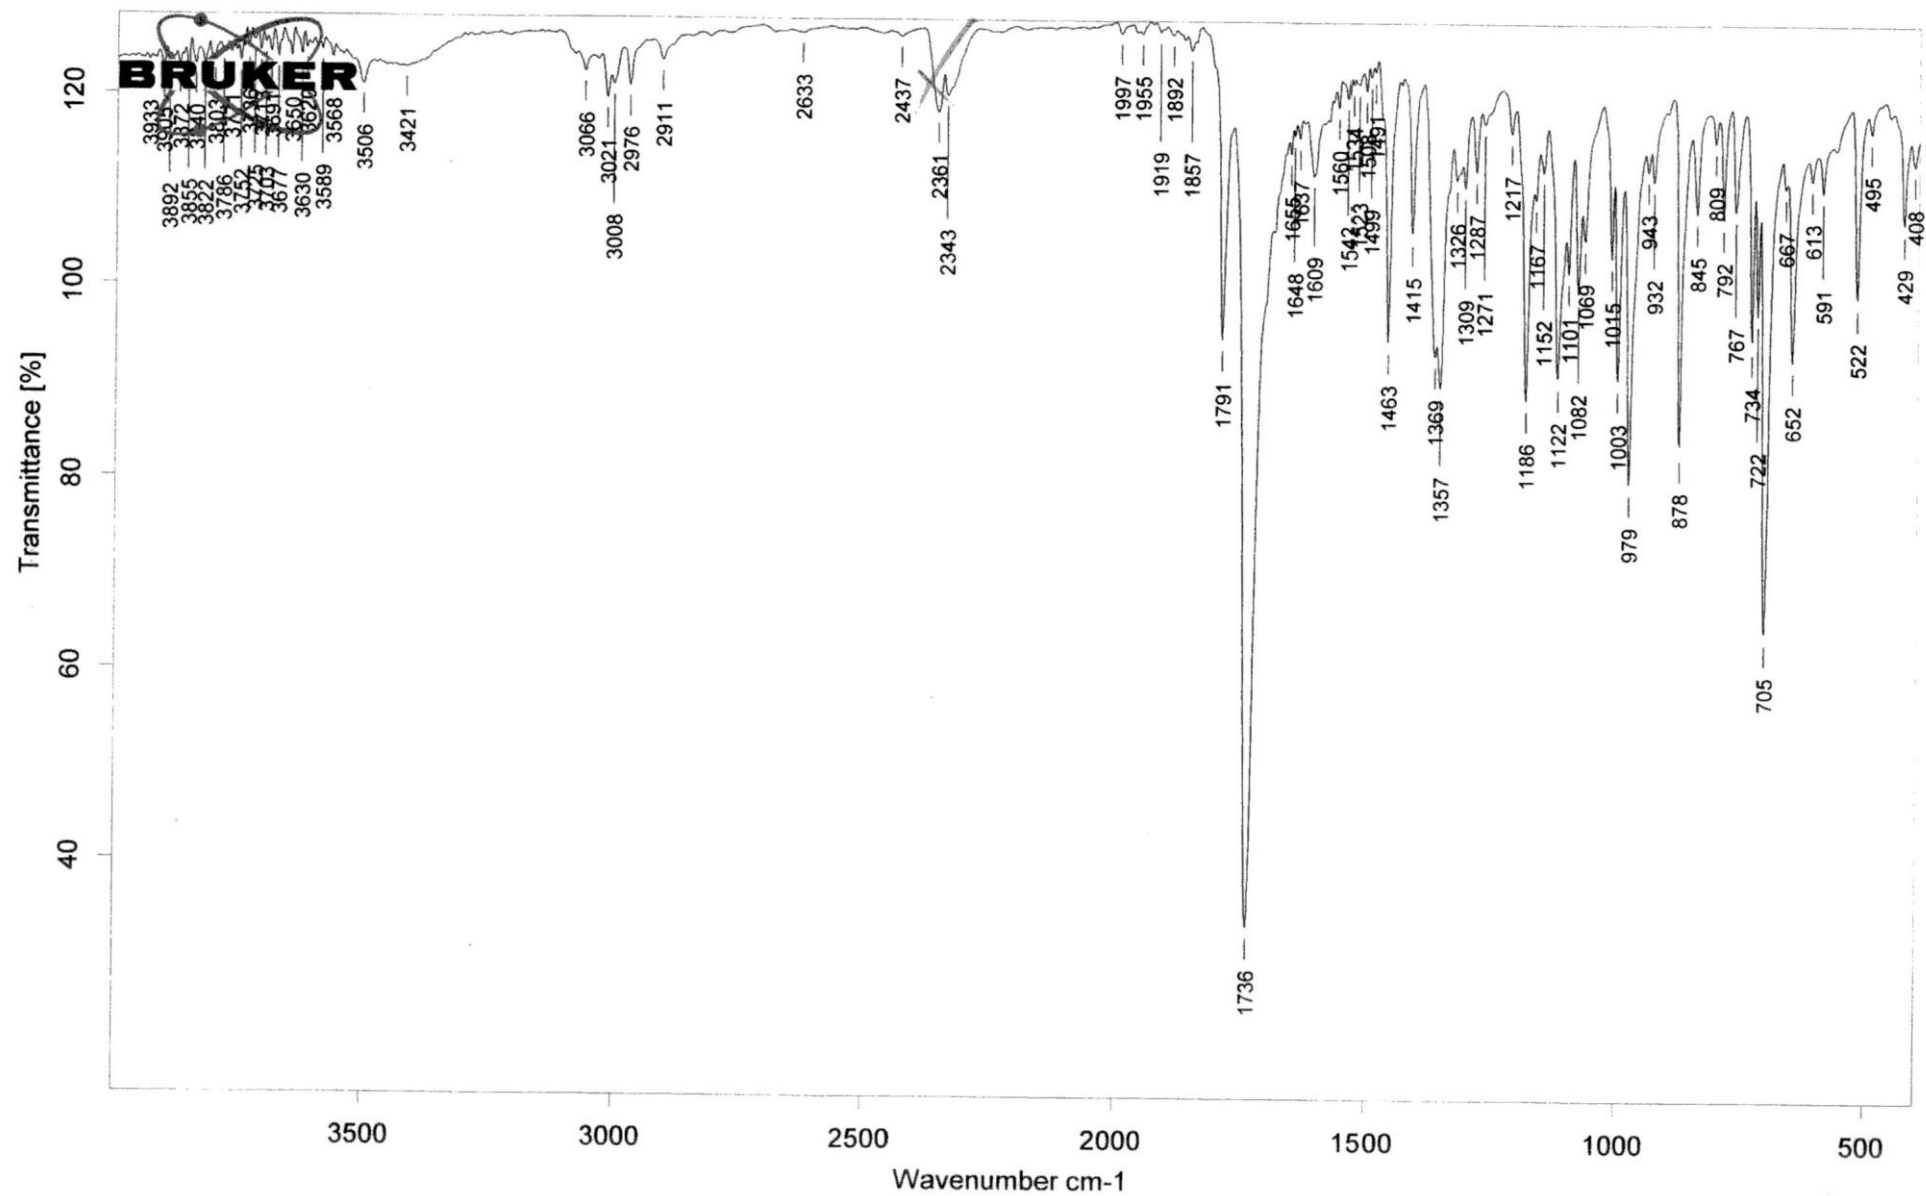

FT-IR (KBr pellet) spectrum of 1-(2-iodo-2-phenylethoxy)pyrrolidine-2,5-dione 3ab

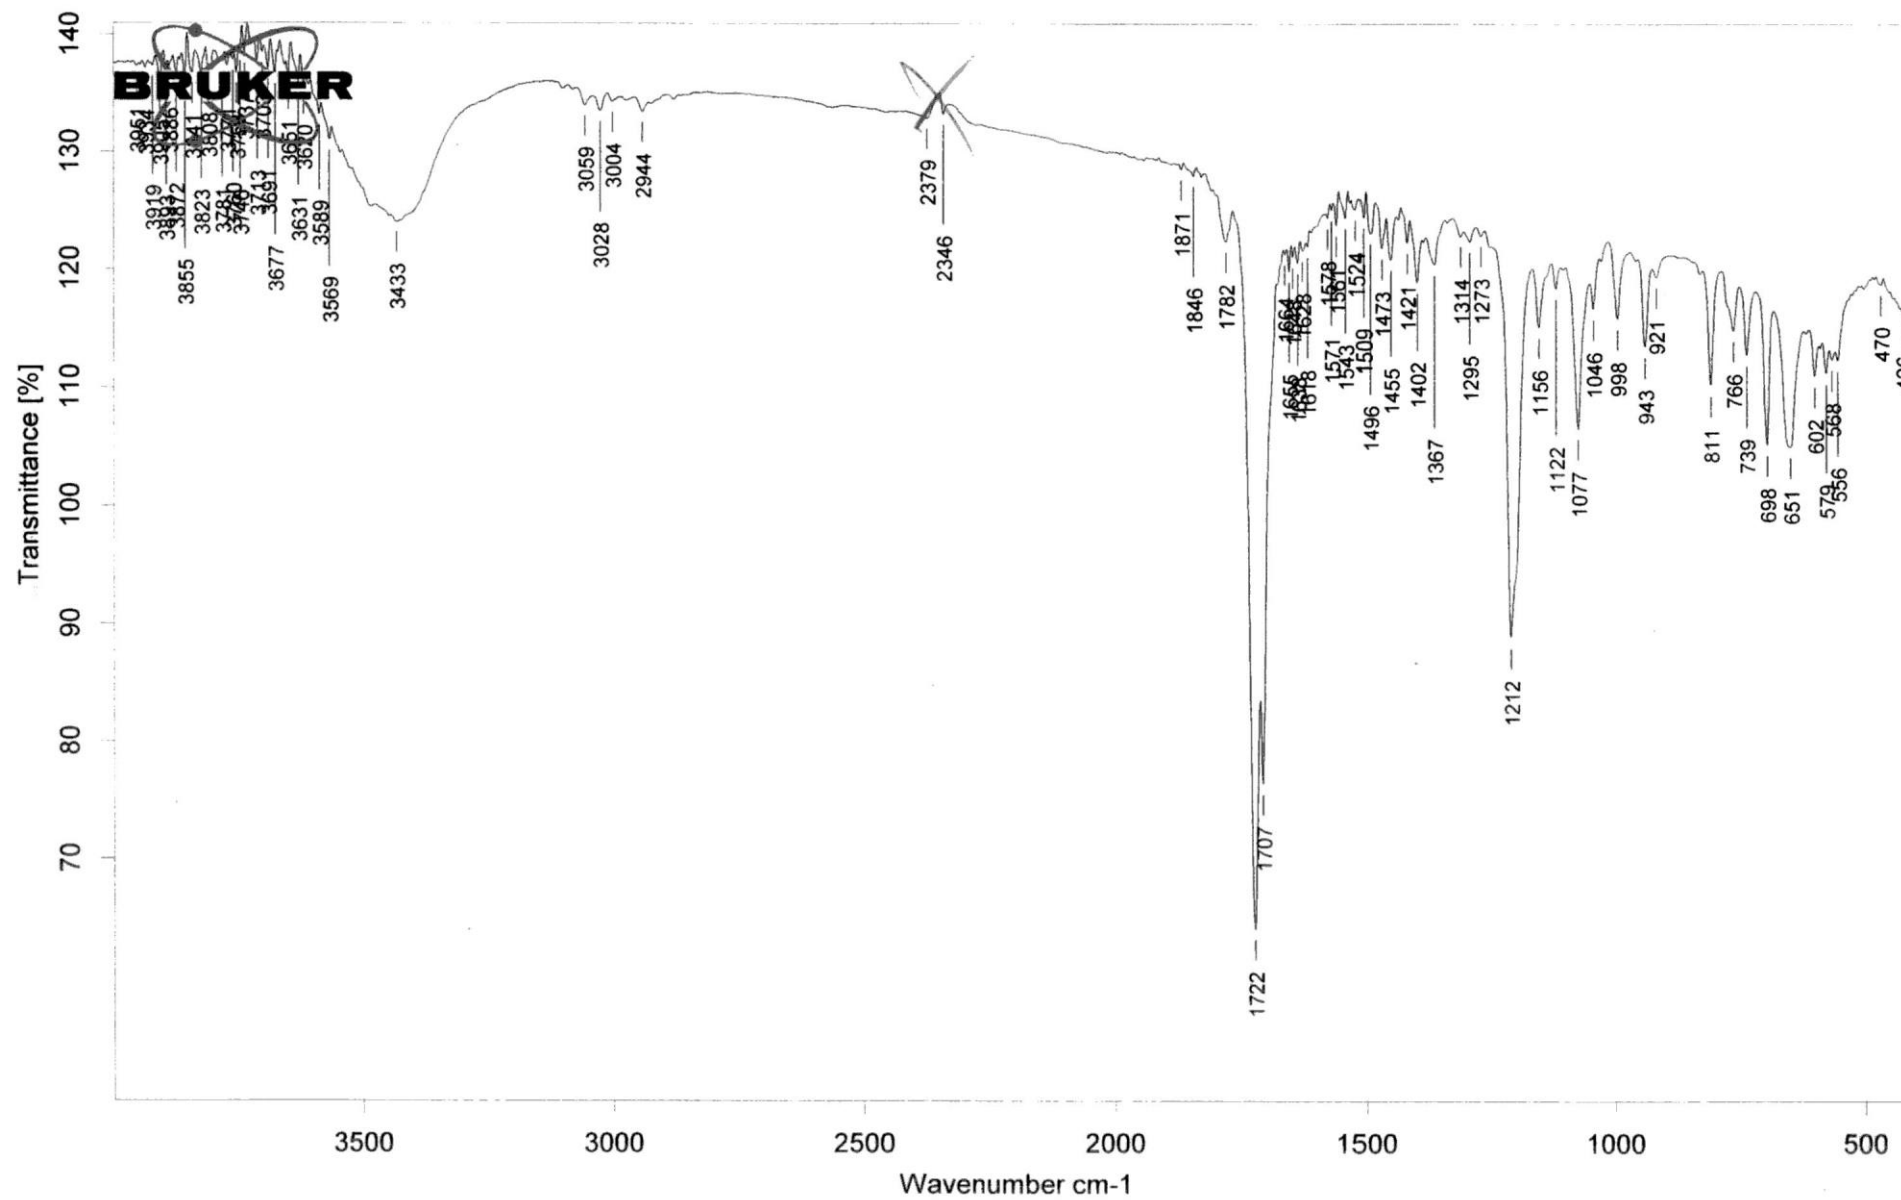

FT-IR (KBr pellet) spectrum of 1-(2-iodo-2-(*p*-tolyl)ethoxy)pyrrolidine-2,5-dione 3bb

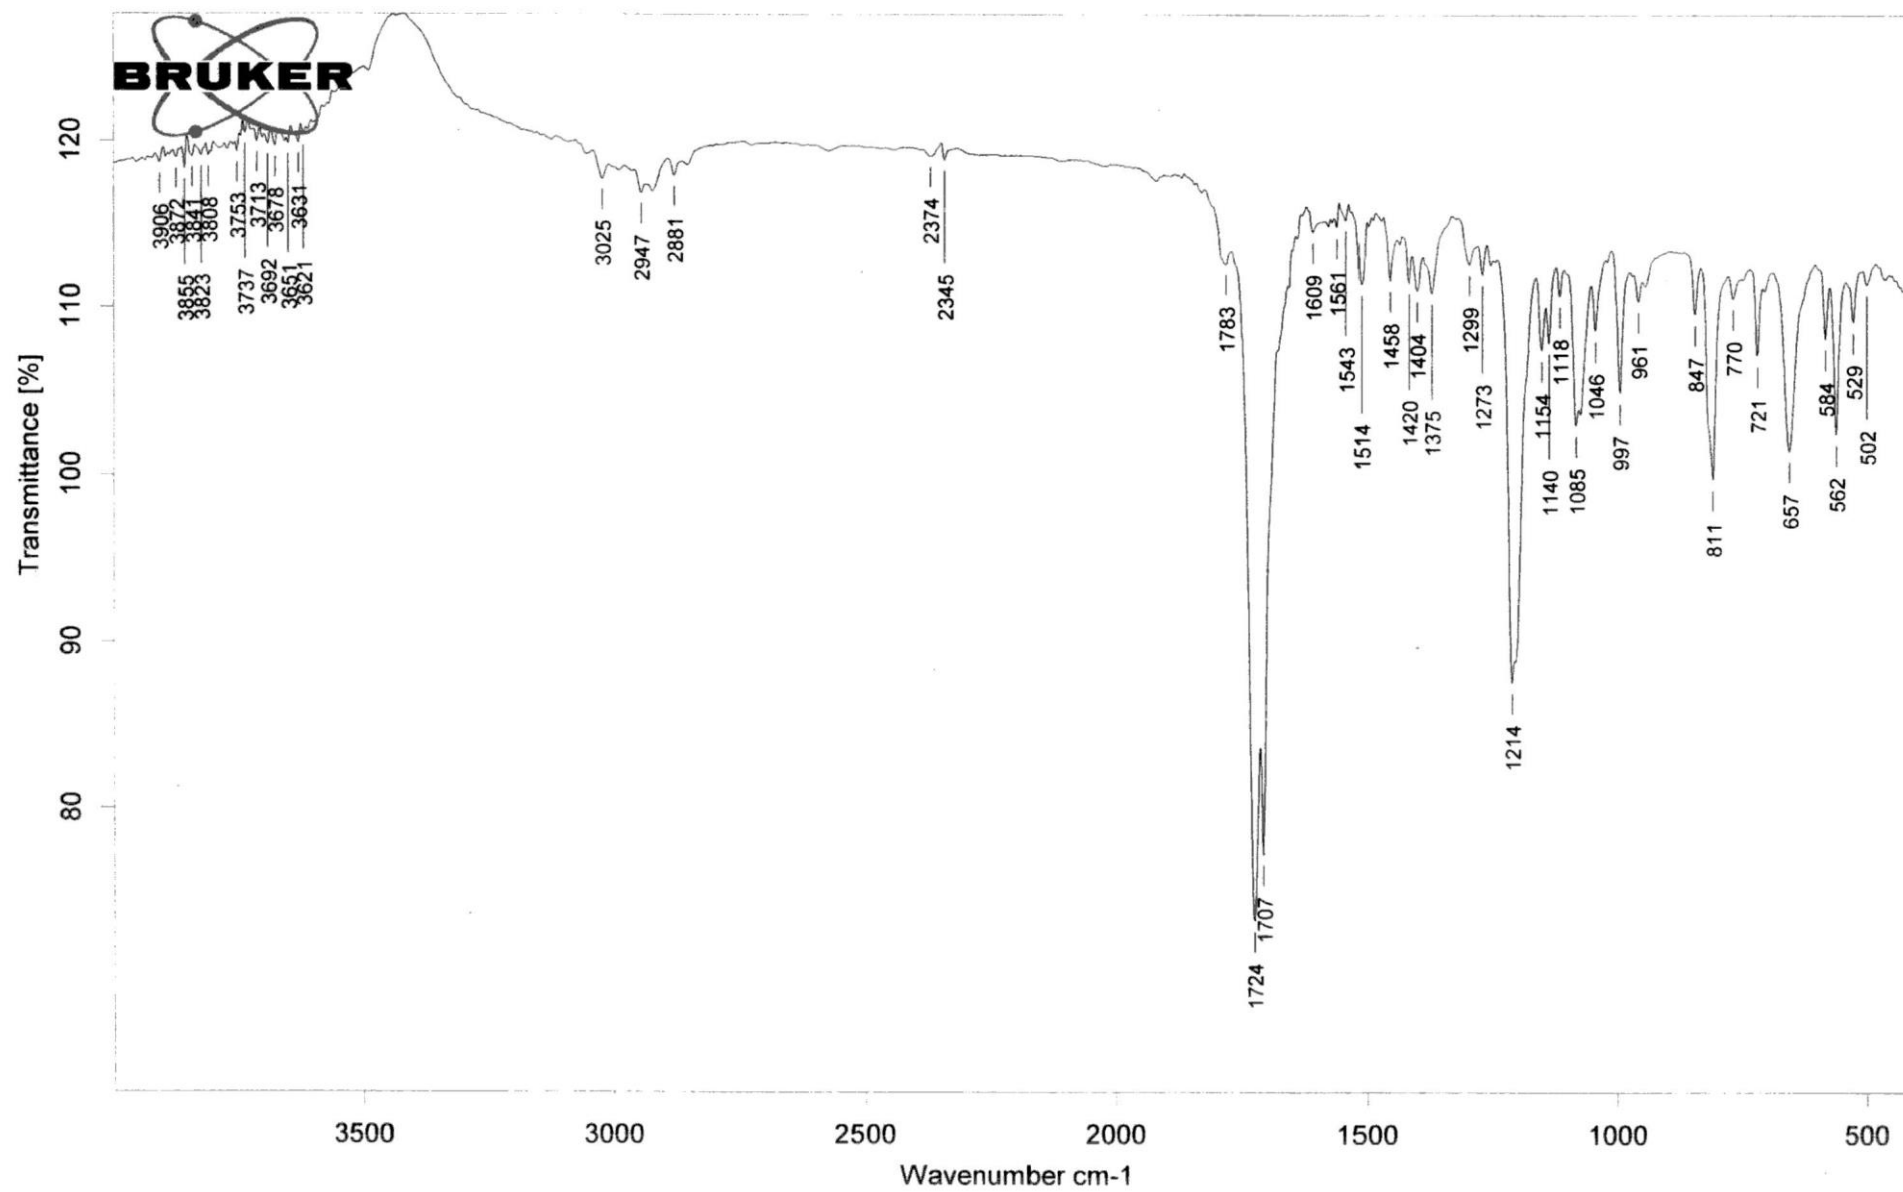

FT-IR (KBr pellet) spectrum of 1-(2-(4-chlorophenyl)-2-iodoethoxy)pyrrolidine-2,5-dione 3c

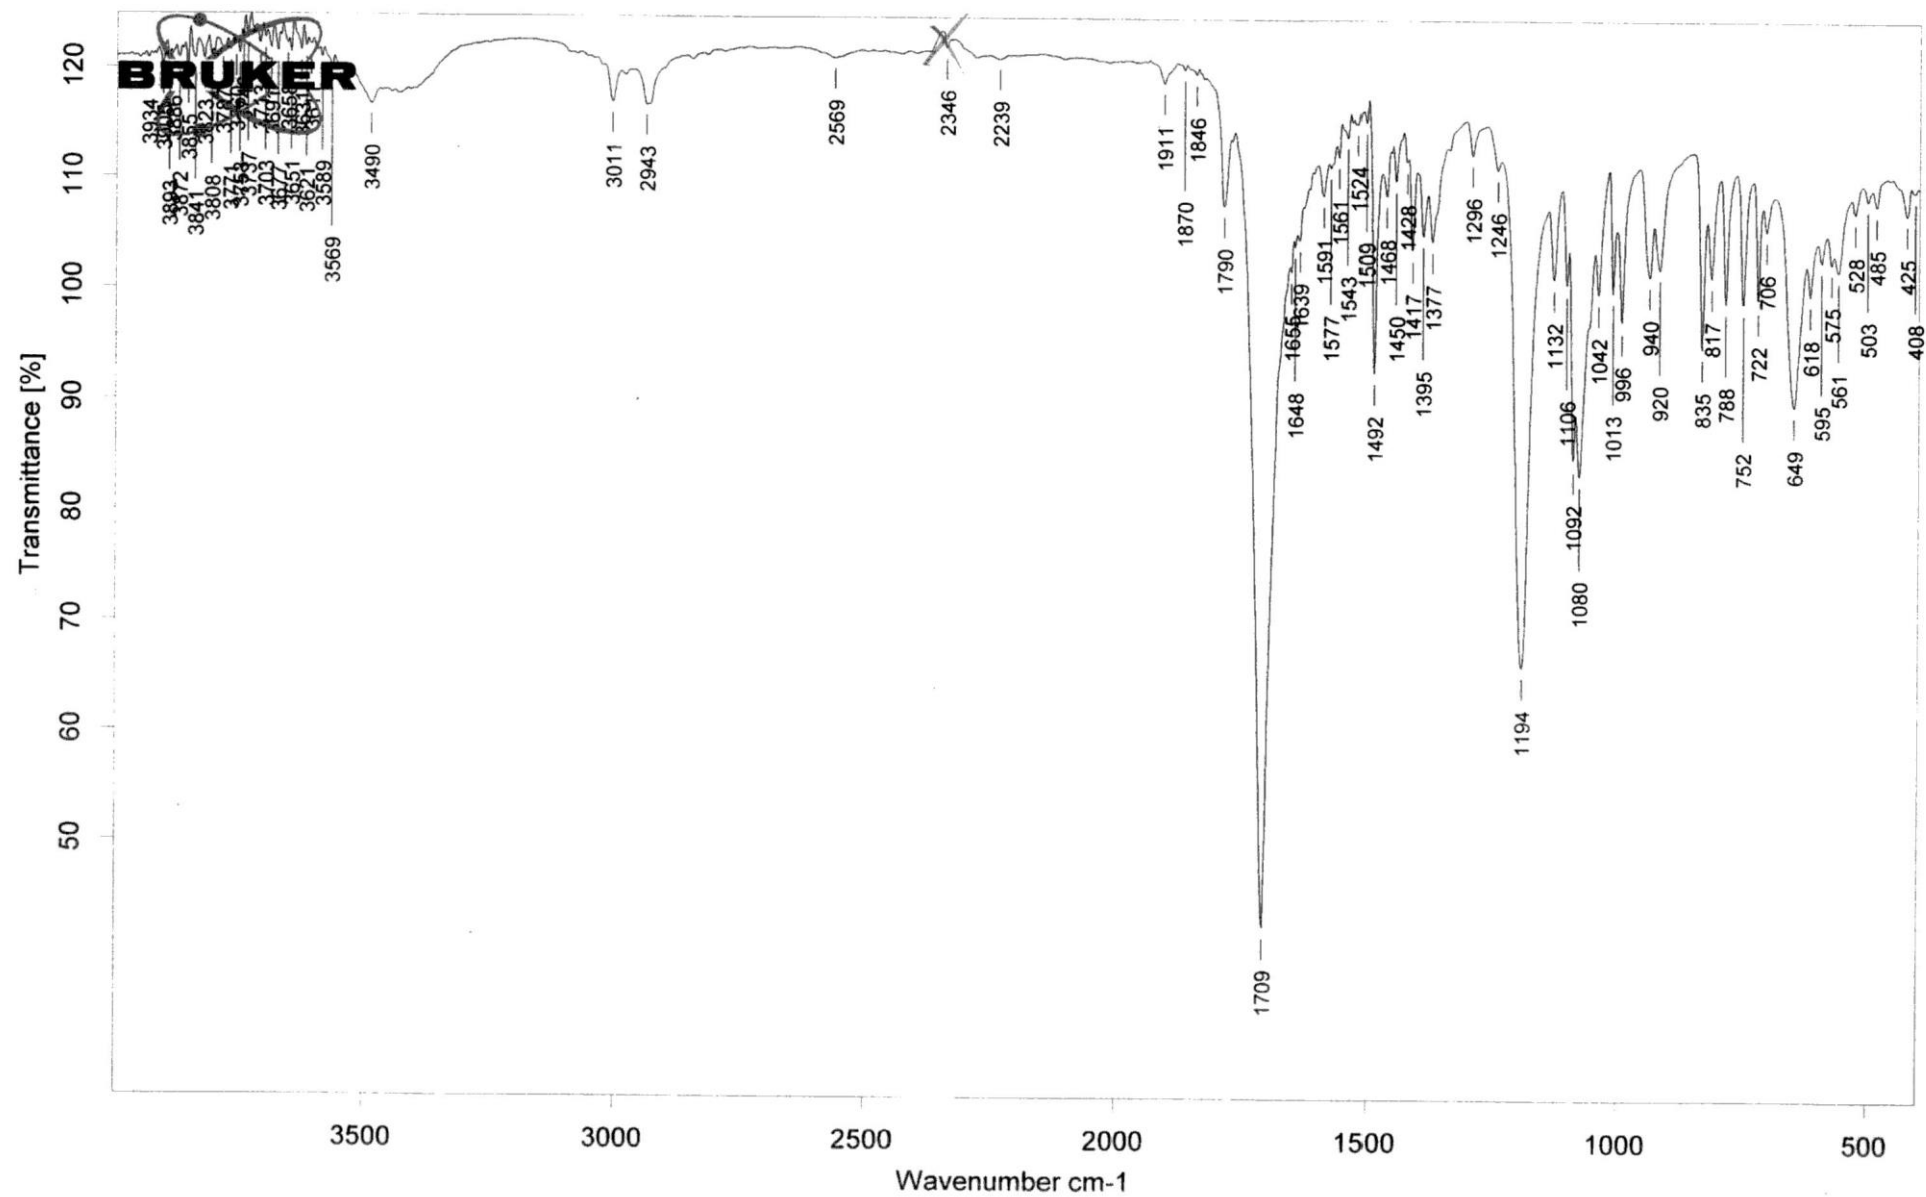



FT-IR (KBr pellet) spectrum of 1-(2-(4-fluorophenyl)-2-iodoethoxy)pyrrolidine-2,5-dione 3db

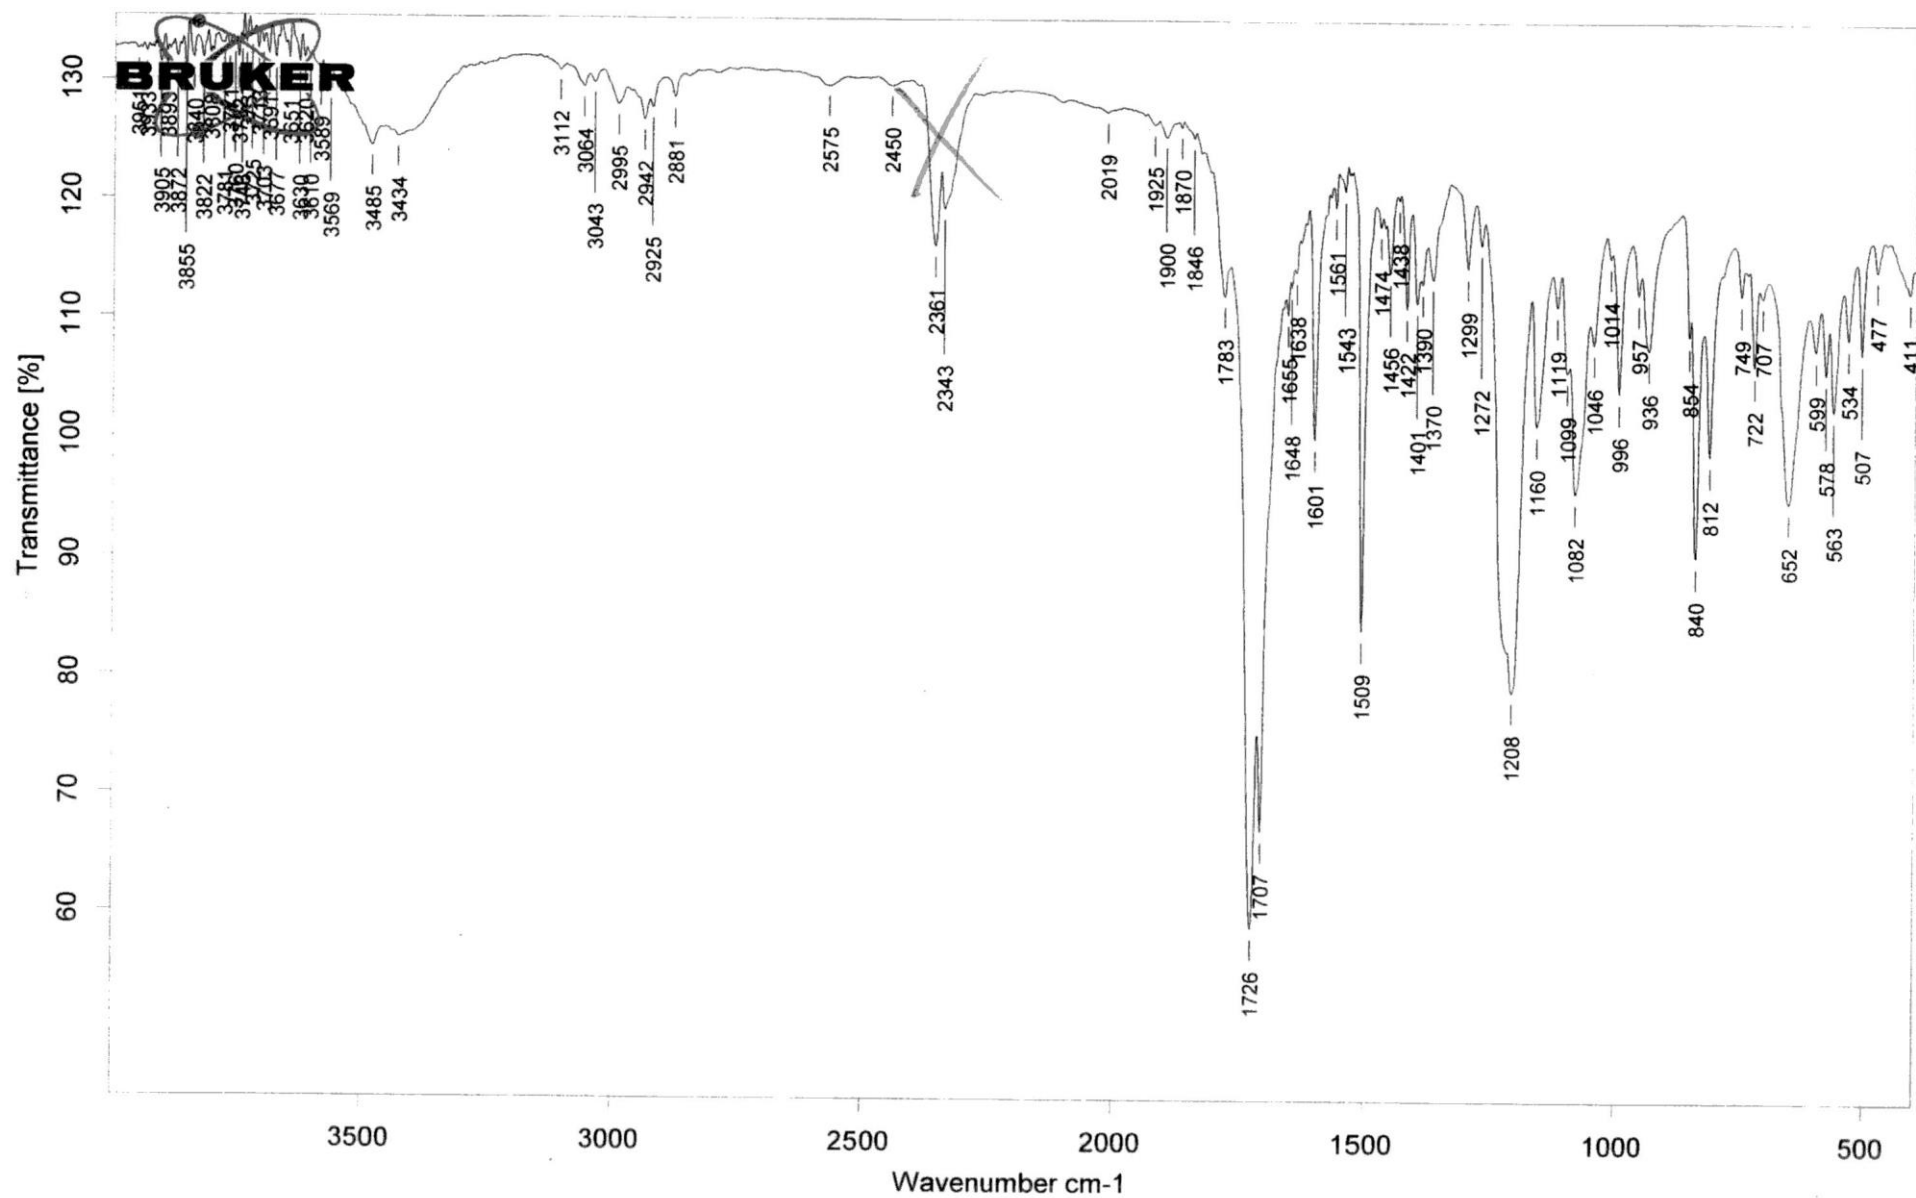

[illegible]

FT-IR (KBr pellet) spectrum of 1-(2-iodo-2-(perfluorophenyl)ethoxy)pyrrolidine-2,5-dione 3hb

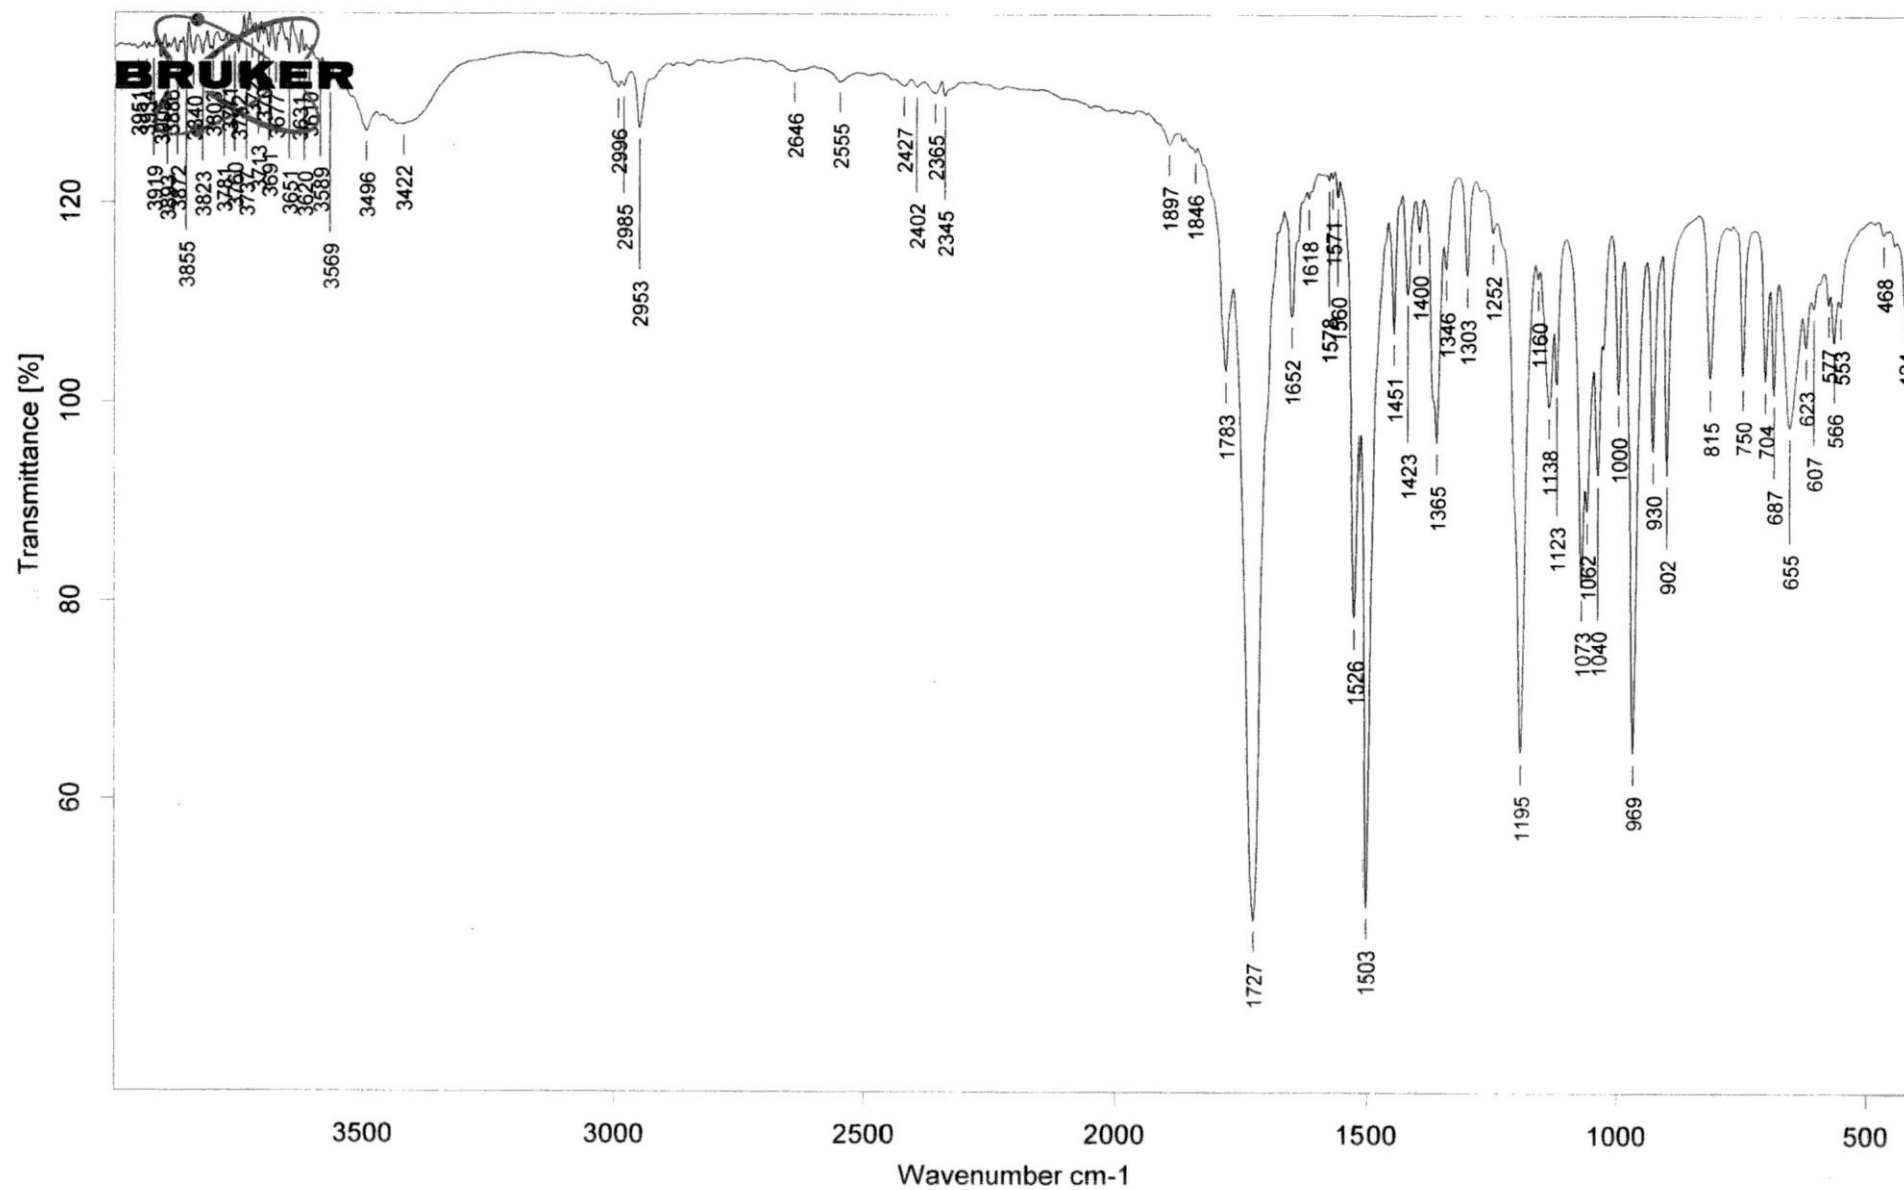

FT-IR (KBr pellet) spectrum of 1-((1-iodo-2,3-dihydro-1H-inden-2-yl)oxy)pyrrolidine-2,5-dione 3kb

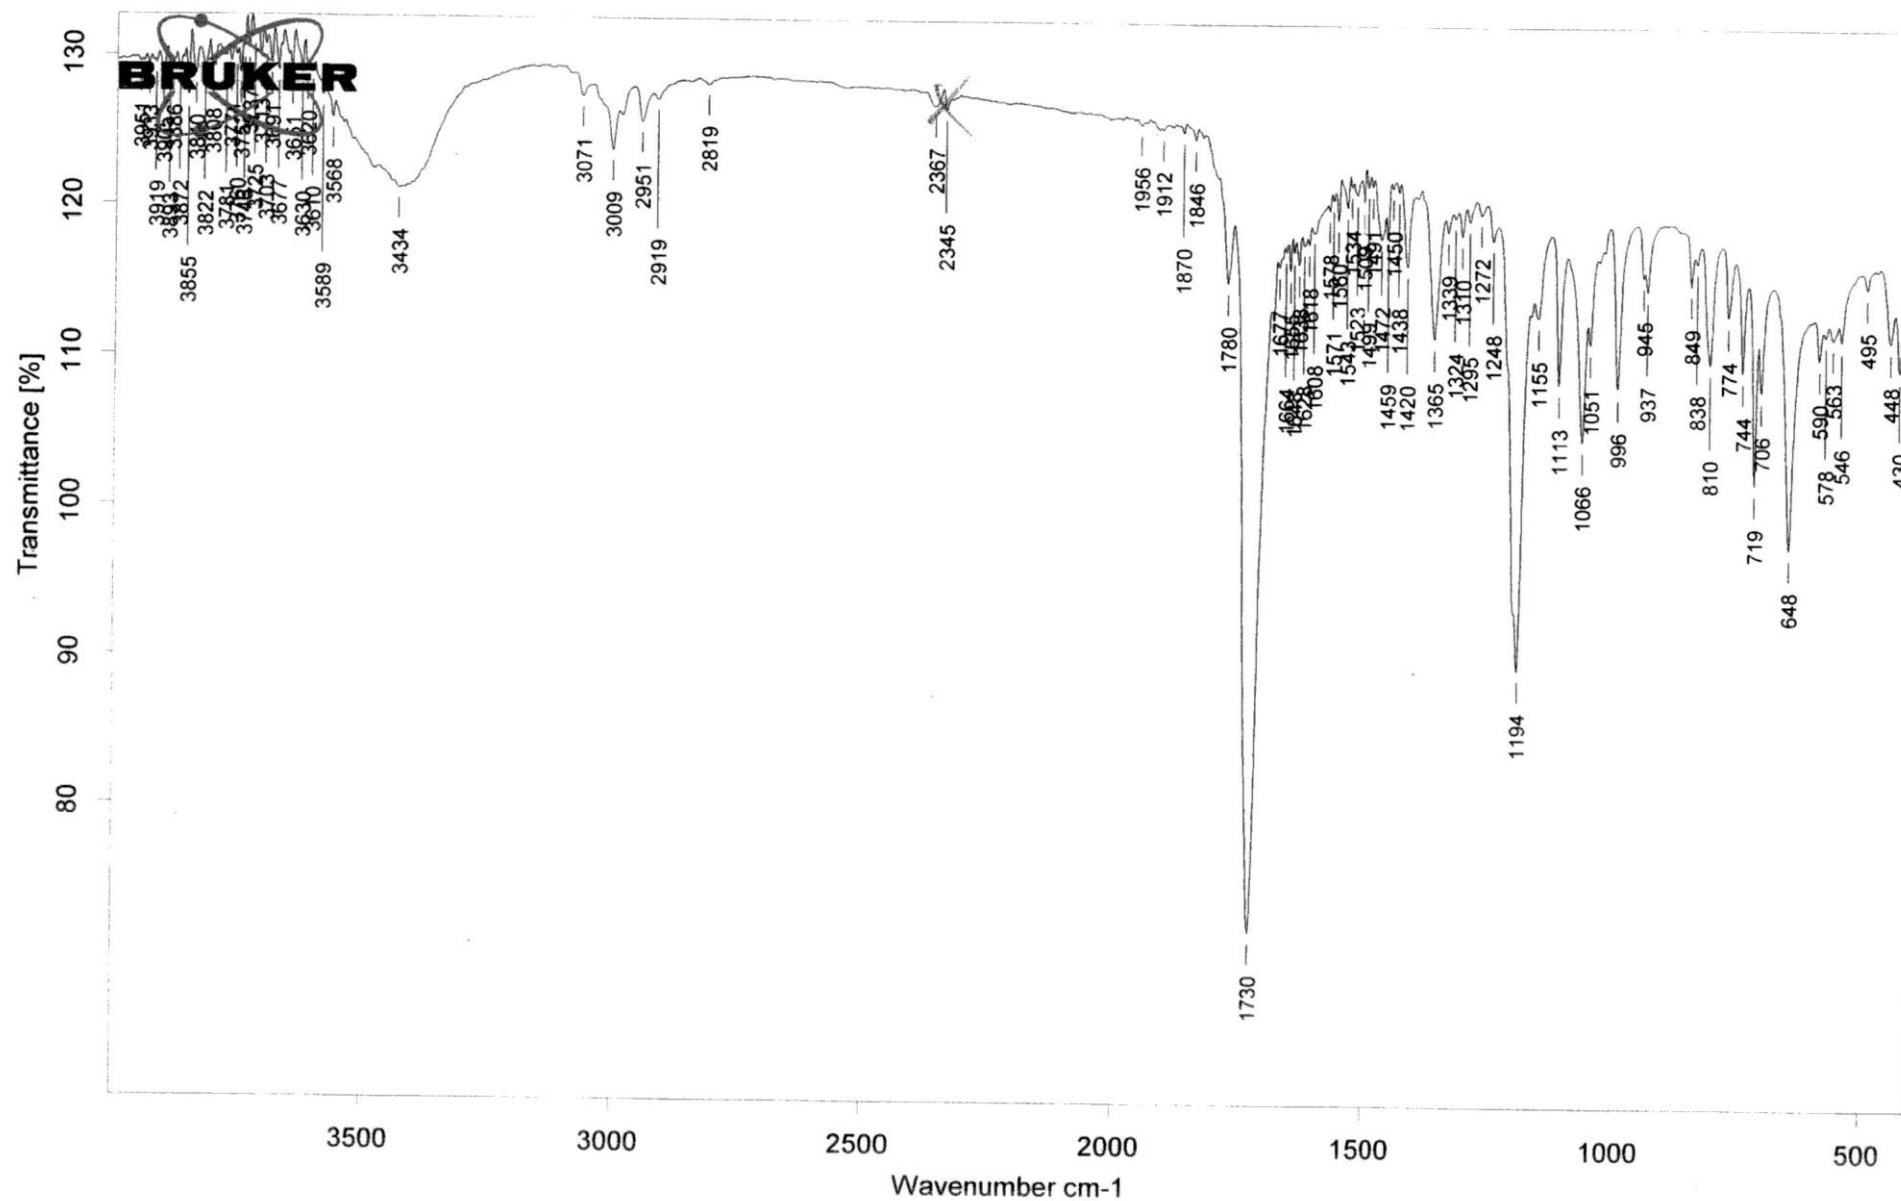

FT-IR (KBr pellet) spectrum of 2-(2-methoxy-2-phenylethoxy)isoindoline-1,3-dione 4a

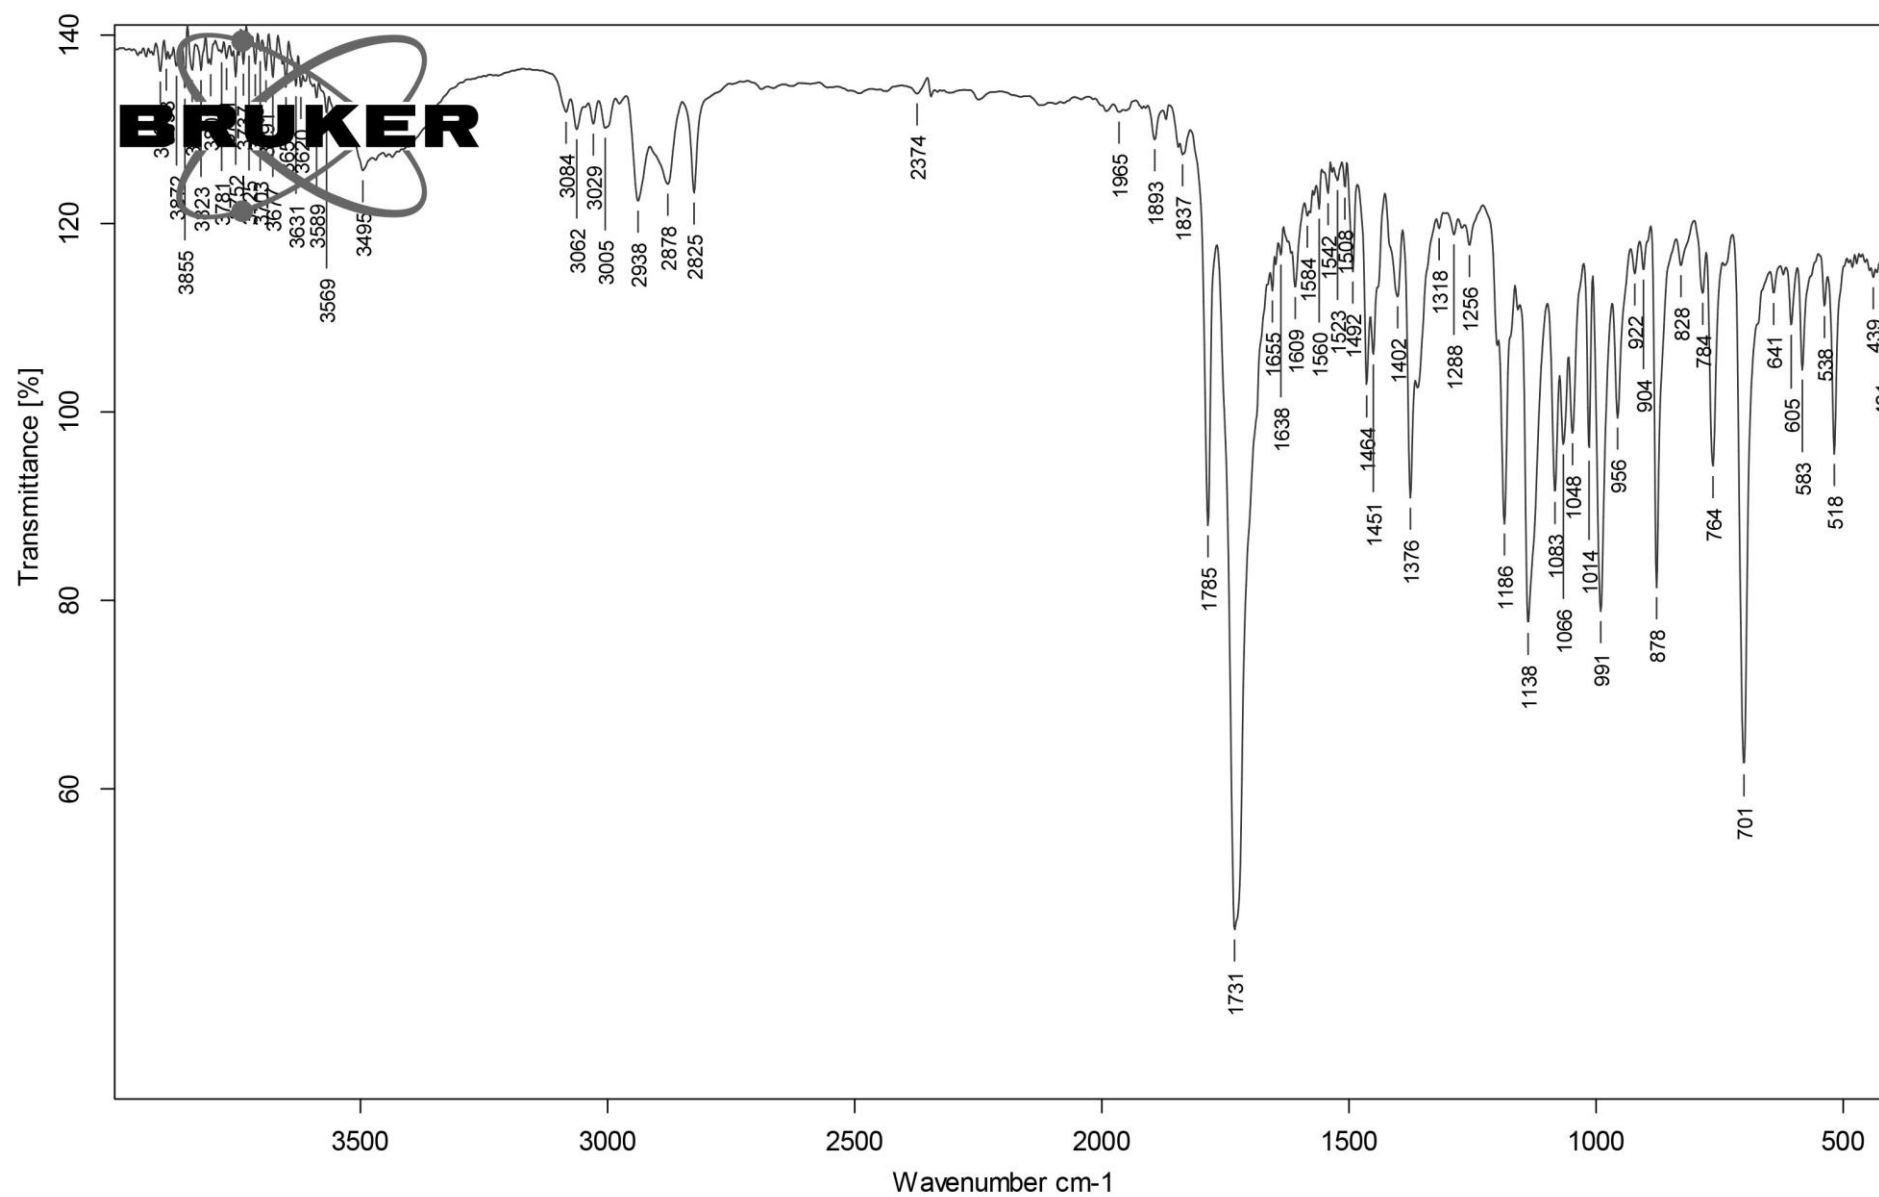

FT-IR (KBr pellet) spectrum of (1-phenylethane-1,2-diylbisulfonyl)dibenzene 4b

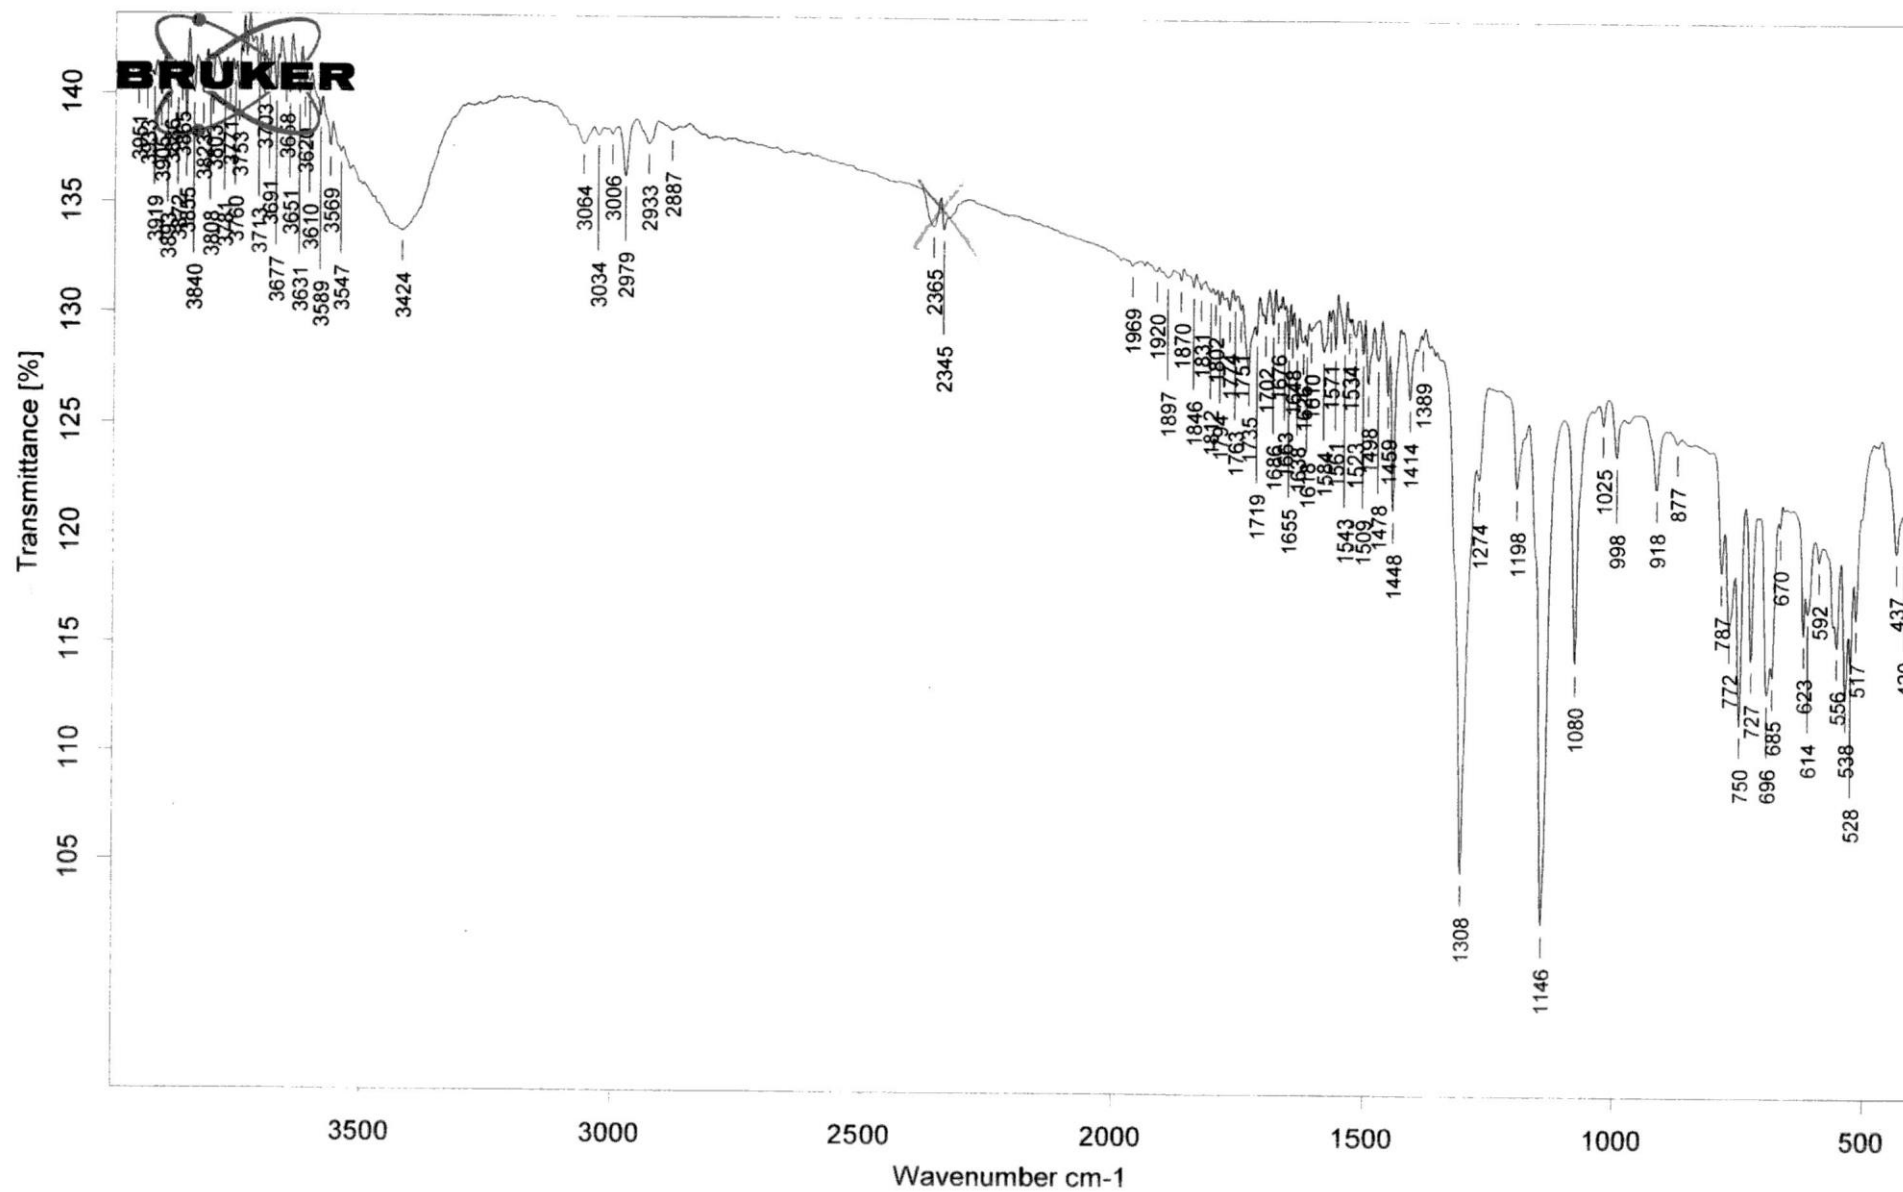

FT-IR (KBr pellet) spectrum of 1-(2-azido-2-phenylethoxy)pyrrolidine-2,5-dione **4c**

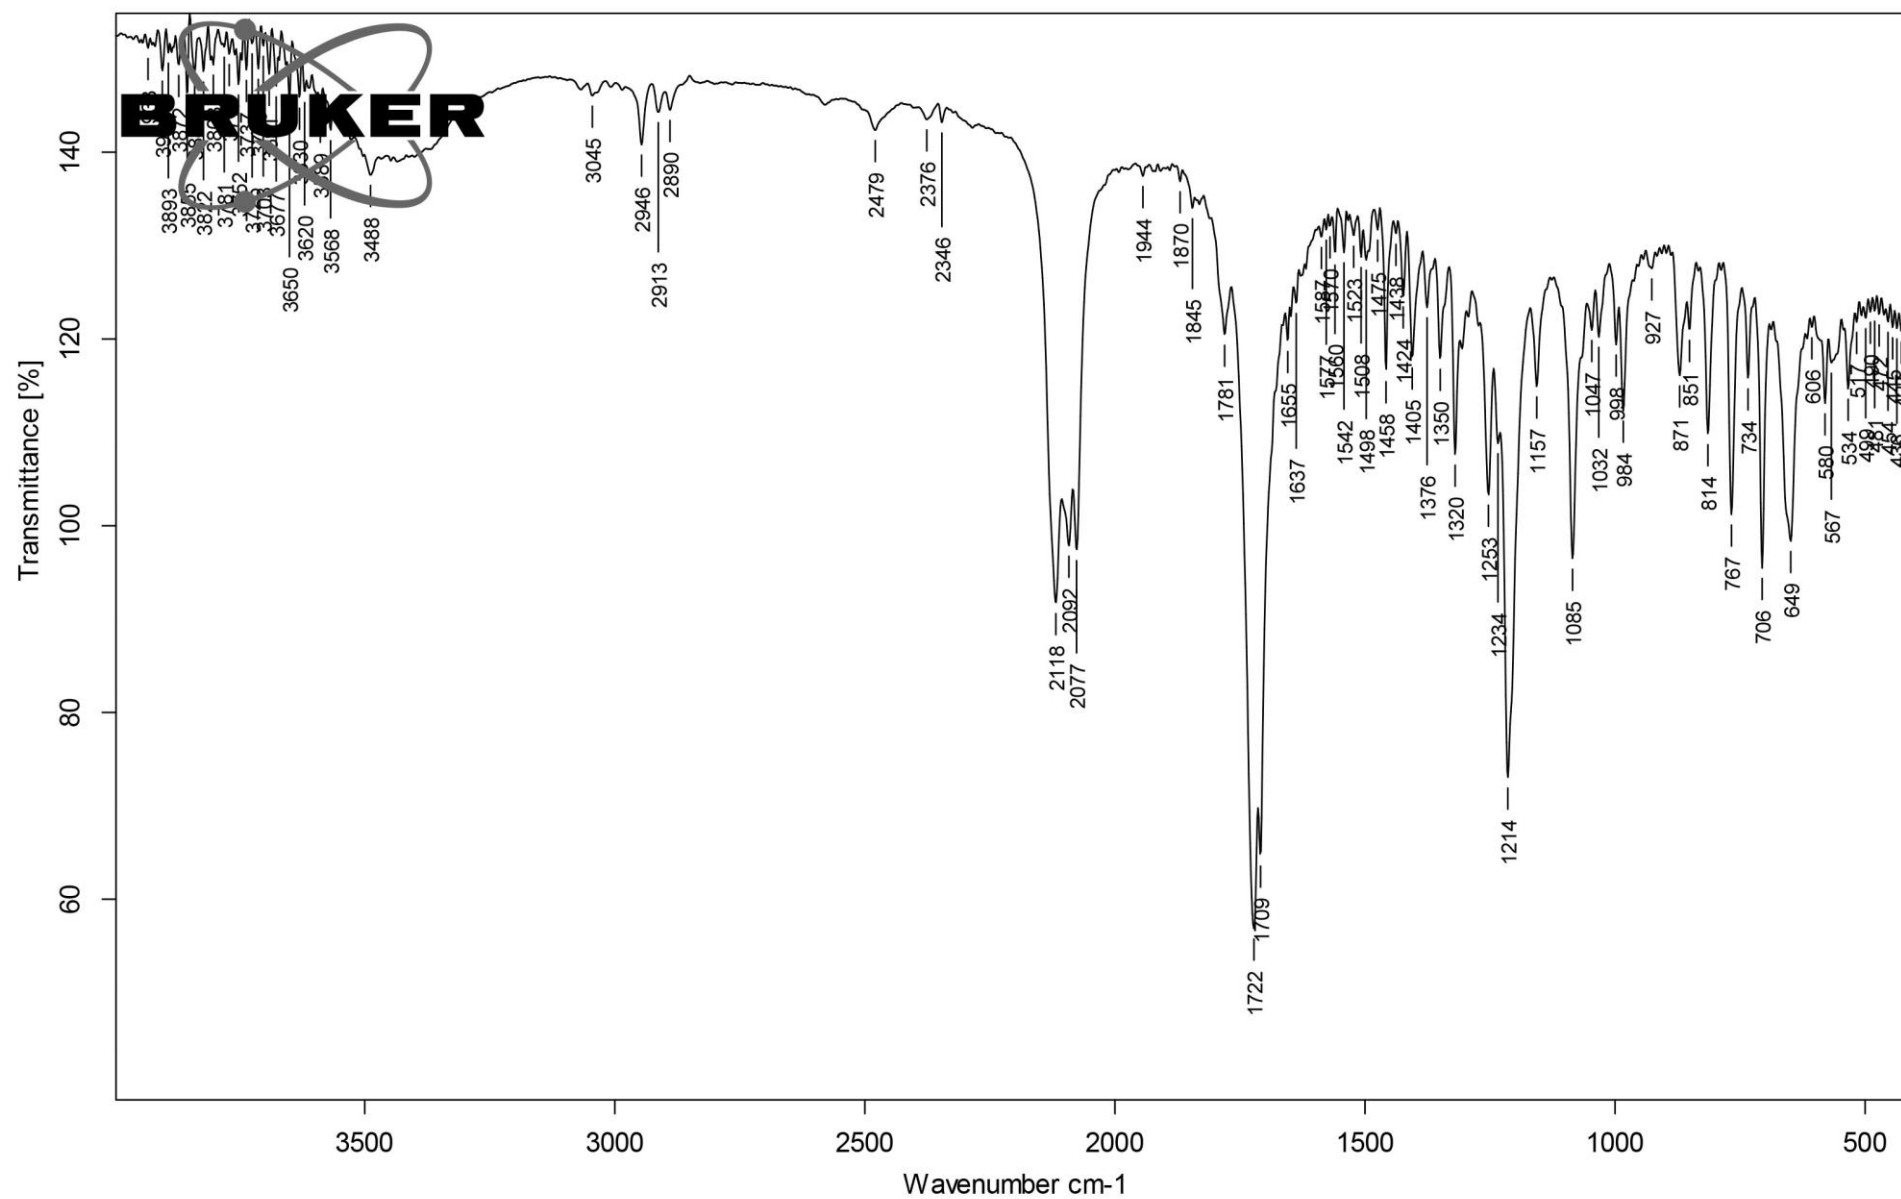

## Structure Determination by X-ray Crystallography

Intensity data for **3ca** were collected at the K4.4 station (“Belok”) of the Kurchatov Center for Synchrotron Radiation and Nanotechnology in Moscow (Russia) at a wavelength of 0.987 Å using a MAR CCD 165 detector. Data integration was carried out using the CCP4 software [1]. A multi-scan empirical absorption correction was applied to the data using SCALA [1]. The structures were solved by direct methods and refined by the full-matrix least squares method against  $F^2$  of all data, using SHELXL-2014 [2] and OLEX2 [3] software. Non-hydrogen atoms were found on difference Fourier maps and refined with anisotropic displacement parameters with an exception of disordered carbon and oxygen atoms. The positions of hydrogen atoms were calculated and included in refinement in isotropic approximation by the riding model with the  $U_{\text{iso}}(\text{H}) = 1.5U_{\text{eq}}(\text{C}_i)$  for methyl groups and  $1.2U_{\text{eq}}(\text{C}_{ii})$  for other atoms, where  $U_{\text{eq}}(\text{C})$  are equivalent thermal parameters of parent atoms. Analysis of Fourier difference maps has shown that Ph groups and ethylene bridge in **3ca** are disordered. The occupancy of corresponding atomic positions was refined as approximately 3:7. The nature of observed disorder can be related to presence of “unbalanced” racemate – a crystalline species, in which the ratio of ordered enantiomers is not unity [4]. Details of data collection and refinement are listed in Table S1. Molecular view of investigated compound in representation of atoms with thermal ellipsoids is given on Figure S1.

## References

1. Winn, M. D.; Ballard, C. C.; Cowtan, K. D.; Dodson, E. J.; Emsley, P.; Evans, P. R.; Keegan, R. M.; Krissinel, E. B.; Leslie, A. G.; McCoy, A.; McNicholas, S. J.; Murshudov, G. N.; Pannu, N. S.; Potterton, E. A.; Powell, H. R.; Read, R. J.; Vagin, A.; Wilson, K. S. *Acta Crystallogr., Sect. D: Biol. Crystallogr.* **2011**, 67, 235. doi: 10.1107/S0907444910045749
2. Sheldrick, G. M. *Acta Crystallogr., Sect. C: Struct. Chem.* **2015**, 71, 3. doi: 10.1107/S2053229614024218
3. Dolomanov, O. V.; Bourhis, L. J.; Gildea, R. J.; Howard, J. A. K.; Puschmann, H. *J. Appl. Crystallogr.* **2009**, 42, 339. doi: 10.1107/s0021889808042726
4. Levkin, P. A.; Torbeev, V. Yu.; Lenev, D. A.; Kostyanovsky, R. G. Homo- and Heterochirality in Crystals. In *Topics in Stereochemistry*; Denmark, S. E., Siegel, J. S., Ed.; John Wiley & Sons, Inc.: Hoboken, New Jersey, 2006; Vol. 25, pp 81-134.



**Table S1.** Crystallographic data for **3ca**

|                   |                                                    |                                                                                       |              |
|-------------------|----------------------------------------------------|---------------------------------------------------------------------------------------|--------------|
| Brutto formula    | C <sub>16</sub> H <sub>11</sub> ClINO <sub>3</sub> | d <sub>calc</sub> , g·cm <sup>-3</sup>                                                | 1.684        |
| Molecular weight  | 427.61                                             | μ, cm <sup>-1</sup>                                                                   | 48.84        |
| T, K              | 100                                                | F(000)                                                                                | 3328         |
| Space group       | Fdd2                                               | 2θ <sub>max</sub> , °                                                                 | 70           |
| Z                 | 16                                                 | Reflections collected                                                                 | 9382         |
| a, Å              | 27.181(5)                                          | Independent reflections                                                               | 2674         |
| b, Å              | 48.899(10)                                         | Reflections with I>2σ(I)                                                              | 2095         |
| c, Å              | 5.0757(10)                                         | Parameters                                                                            | 169          |
| α, °              | 90                                                 | R1 [I>2σ(I)]                                                                          | 0.0715       |
| β, °              | 90                                                 | wR <sub>2</sub> [all data]                                                            | 0.1728       |
| γ, °              | 90                                                 | GOF                                                                                   | 0.987        |
| V, Å <sup>3</sup> | 6746(2)                                            | Residual electron density, e·Å <sup>-3</sup><br>(ρ <sub>min</sub> /ρ <sub>max</sub> ) | 1.171/-0.960 |

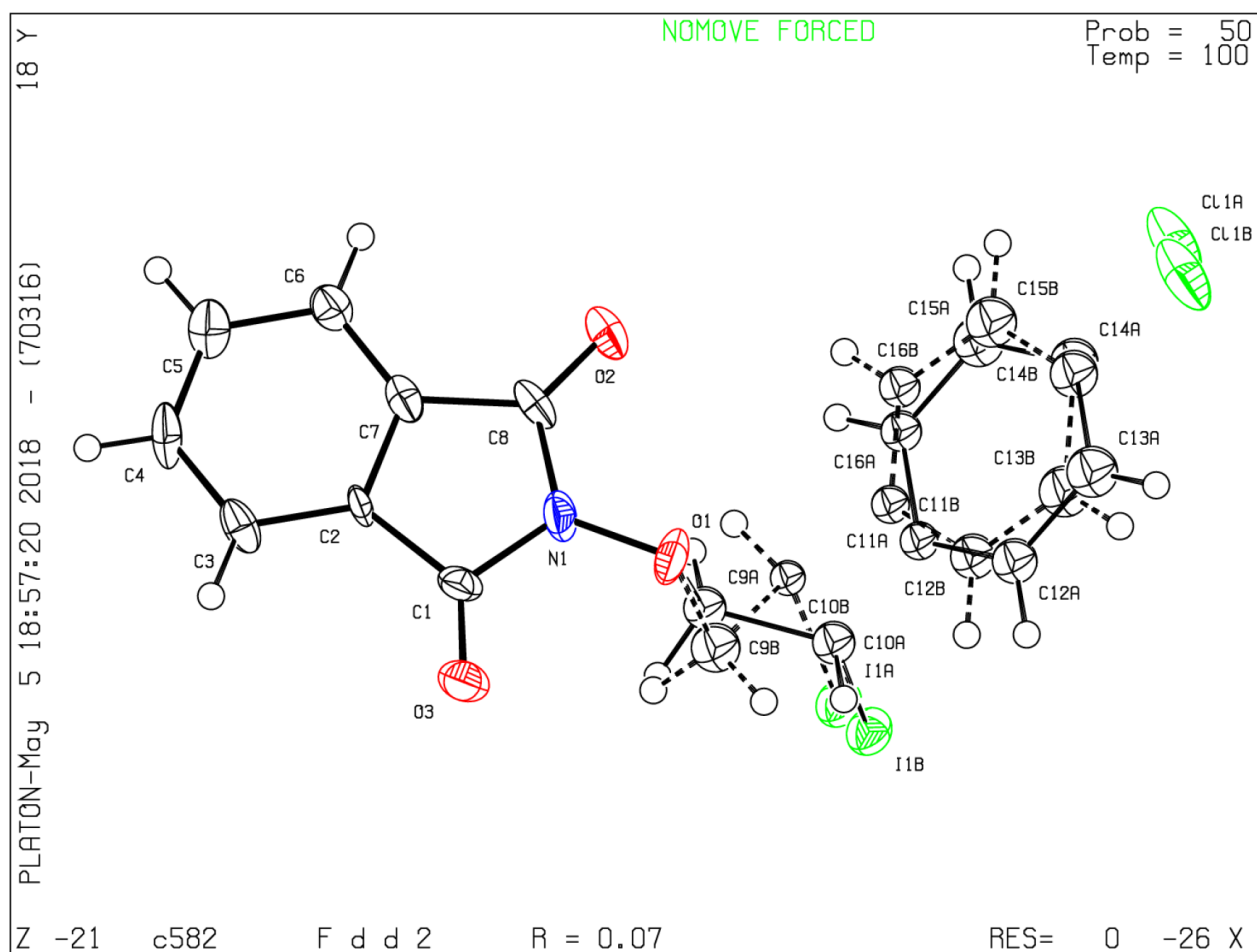**Figure S1.** Molecular structure of **3ca**. Atoms are presented as thermal ellipsoids (50% probability).
